# Supplementary material for: Construction of tetrahydro-β-carboline skeletons via Brønsted acid activation of imide carbonyl group: syntheses of indole alkaloids (±)-harmicine and (±)-10-desbromoarborescidine-A
Source: Royal Society of Chemistry journal article supplement (doi:10.1039/c2ra21734a), 2012-01-01
Supplement: c2ra21734a.pdf [file c2ra21734a.pdf]

# Construction of tetrahydro- $\beta$ -carboline skeleton *via* Brønsted acid activation of imide carbonyl group: Syntheses of indole alkaloids ( $\pm$ )-harmicine and ( $\pm$ )-10-desbromoarborescidine-A

Selvaraj Mangalaraj and Chinnasamy Ramaraj Ramanathan\*

*Department of Chemistry, Pondicherry University, Puducherry-605014, India.*

[crnrath.che@pondiuni.edu.in](mailto:crnrath.che@pondiuni.edu.in).

## Supporting Information

|   |                                                                                     |     |
|---|-------------------------------------------------------------------------------------|-----|
| A | General Information                                                                 | S2  |
| B | Synthesis of 6, 7, 8, 9                                                             | S3  |
| C | General procedure for the synthesis of imide derivative of tryptamine               | S6  |
| D | General procedure for the synthesis of imide derivative of substituted tryptamine   | S8  |
| E | General procedure for the synthesis of benzindolizino-indolones                     | S15 |
| F | General procedure for the synthesis of indoloindolizinones and indoloquinolizinones | S23 |
| G | Synthesis of ( $\pm$ )-harmicine                                                    | S30 |
| H | Synthesis of ( $\pm$ )-10-desbromoarborescidine-A                                   | S31 |
| I | Crystal structures                                                                  | S31 |
| J | References                                                                          | S32 |
| K | Spectral data                                                                       | S34 |

### (A) General Information

**Instrumentation.** All reactions were performed in oven-dried round bottom flasks. Stainless steel syringes or cannulae were used to transfer air and moisture sensitive liquids. Melting points reported in this paper are uncorrected and were determined using EZ Melt, Stanford Research Systems, USA. Infrared spectra were recorded on Thermo Nicolet 6700 FT-IR Spectrophotometer and are reported in frequency of absorption ( $\text{cm}^{-1}$ ). High resolution mass spectra (HRMS) were recorded on Q-TOF Micro mass spectrometer.  $^1\text{H}$  and  $^{13}\text{C}$  NMR were recorded on Bruker AVANCE 400 spectrometer. NMR spectra for all the samples were measured either in  $\text{CDCl}_3$  or  $\text{DMSO-}d_6$  or  $\text{acetone-}d_6$  using TMS as an internal standard. The chemical shifts are expressed in  $\delta$  ppm down field from the signal of internal TMS. Data are represented as follows : chemical shift, multiplicity (br = broad, s = singlet, d = doublet, t = triplet, q = quartet, p = pentet, dd = doublet of doublet, ddd = doublet of doublet of doublet, td = triplet of doublet, dt = doublet of triplet, sep = septet, m = multiplet), coupling constants in Hertz (Hz), and integration. Trifluoromethanesulphonic acid, 4-amino-1-butanol, oxalyl chloride, substituted phenyl hydrazine hydrochloride were purchased from Aldrich; remaining from local products and used without further purification. Column chromatography was performed on Merck silica gel 100-200 mesh, neutral alumina 70-230 mesh and TLC analysis was facilitated using phosphomolybdic acid stain in addition to UV light with Merck 60 F<sub>254</sub> pre-coated silica plates.

**Abbreviations used:** EtOAc – ethyl acetate, THF – tetrahydrofuran, MeOH – methanol, TEA – triethylamine, MS – molecular sieves, LAH – lithium aluminum hydride, TLC – thin layer chromatography.

## Representative Experimental procedures

### (B) Synthesis of 6, 7, 8, 9

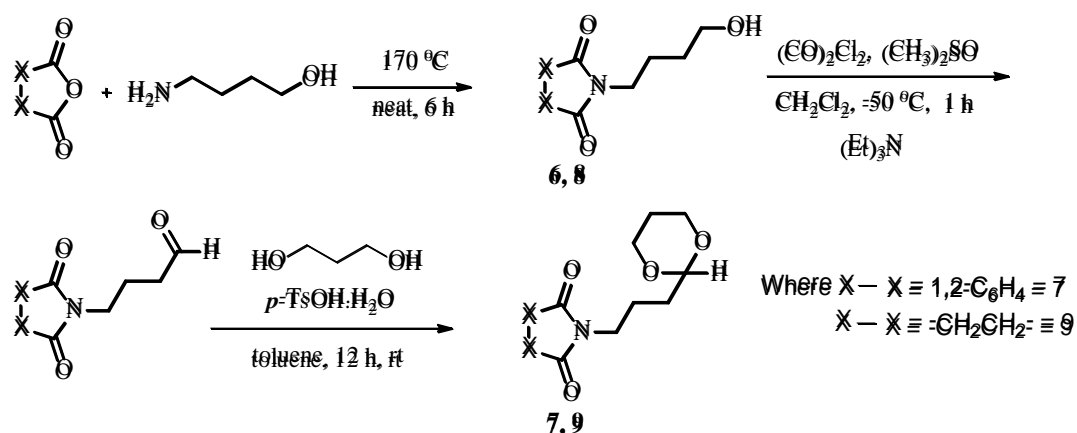

#### 2-(4-Hydroxybutyl)isoindoline-1,3-dione (6)<sup>1</sup>

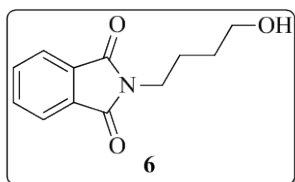

A mixture of finely powdered phthalic anhydride (8.308 g, 56.092 mmol) and 4-amino-1-butanol (5.000 g, 56.092 mmol) were heated at 170 °C with vigorous stirring under nitrogen atmosphere. After 6 h the reaction mixture was cooled to 80 °C and it was poured to 100 mL of ice-cold water. The product was extracted with CHCl<sub>3</sub> (4 x 100 mL), and the combined organic layer was washed with 5% NaHCO<sub>3</sub> solution (3 x 100 mL), and with water (3 x 100 mL). Organic layer was dried over anhydrous Na<sub>2</sub>SO<sub>4</sub>, filtered and the solvent was removed under vacuum to give the mixture, which was purified through silica gel column chromatography using ethyl acetate : hexane as eluent (2:5) to give 2-(4-hydroxybutyl)isoindoline-1,3-dione in 92% yield (11.314 g) as colorless solid. (m.p. : 45-46 °C, lit.<sup>1</sup> 47-49 °C); IR (KBr, cm<sup>-1</sup>) : 3471, 2938, 1771, 1710, 1399; <sup>1</sup>H-NMR (CDCl<sub>3</sub>, 400 MHz) : δ 7.84 (dd, *J* = 5.4, 3.0 Hz, 2H), 7.71 (dd, *J* = 5.4, 3.0 Hz, 2H), 3.74 (t, *J* = 7.2 Hz, 2H), 3.69 (t, *J* = 6.4 Hz, 2H), 1.82-1.75 (m, 2H), 1.66-1.59 (m, 2H); <sup>13</sup>C-NMR (CDCl<sub>3</sub>, 100 MHz): 168.63, 134.06, 132.23, 123.34, 62.43, 37.84, 29.90, 25.23.

#### 2-(3-(1,3-Dioxan-2-yl)propyl)isoindoline-1,3-dione (7)

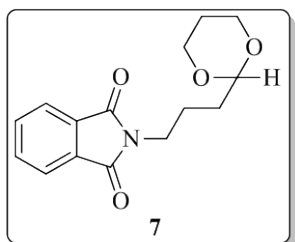

To a well stirred solution of oxalyl chloride (2.8 mL, 33.56 mmol) in 20 mL of CH<sub>2</sub>Cl<sub>2</sub>, a solution of anhydrous (CH<sub>3</sub>)<sub>2</sub>SO (5.7 mL, 80.24 mmol) in 20 mL of CH<sub>2</sub>Cl<sub>2</sub> was added under nitrogen atmosphere at -50 °C at such a rate that temperature was maintained

at  $-50\text{ }^{\circ}\text{C}$ . Stirring was continued for additional 15 min, then a solution of 2-(4-hydroxybutyl)isoindoline-1,3-dione (5.00 g, 22.82 mmol) in 40 mL of  $\text{CH}_2\text{Cl}_2$  was added while keeping the temperature at  $-50\text{ }^{\circ}\text{C}$ . The reaction mixture was stirred for another 1 h at  $-50\text{ }^{\circ}\text{C}$ , and triethylamine (21.42 mL, 153.56 mmol) was added. The mixture is allowed to warm to room temperature, and 200 mL of water was added and stirred for 30 min. The organic layer was separated and washed with water, dried over anhydrous  $\text{Na}_2\text{SO}_4$ , filtered and concentrated in vacuo. The crude 4-(1,3-dioxoisindolin-2-yl)butanal was obtained as viscous oil in 98% yield (4.84 g) and was stored under nitrogen atmosphere and used without further purification for the next step.

Propane-1,3-diol (4.2 g, 55.28 mmol) was added to a solution of 4-(1,3-dioxoisindolin-2-yl)butanal (4.0 g, 18.4 mmol) and *p*-toluenesulphonic acid monohydrate (0.348 g, 0.92 mmol) in toluene (200 mL) at room temperature. The solution was stirred for 12 h, then diluted with ethyl acetate (200 mL) and washed with saturated  $\text{NaHCO}_3$  (60 mL). The layers were separated and the aqueous layer was extracted with ethyl acetate (4 x 50 mL). The combined organic layers were dried over anhydrous  $\text{MgSO}_4$ , filtered and concentrated under reduced pressure. The residue was purified through column chromatography using silica gel and ethyl acetate : hexane as eluent (1:1) to give 2-(3-(1,3-dioxan-2-yl)propyl)isoindoline-1,3-dione in 84% yield (4.256 g) as colorless solid. (m.p. :  $86\text{--}87\text{ }^{\circ}\text{C}$ ); IR (KBr,  $\text{cm}^{-1}$ ) : 3064, 2949, 2843, 1764, 1715, 1613, 1143;  $^1\text{H-NMR}$  ( $\text{CDCl}_3$ , 400 MHz) : 7.82 (dd,  $J = 5.4, 3.0\text{ Hz}$ , 2H), 7.69 (dd,  $J = 5.4, 3.0\text{ Hz}$ , 2H), 4.55 (t,  $J = 5.0\text{ Hz}$ , 1H), 4.07 (dd,  $J = 5.0, 1.2\text{ Hz}$ , 1H), 4.03 (dd,  $J = 5.0, 1.2\text{ Hz}$ , 1H), 3.76 (dd,  $J = 2.4, 1.6\text{ Hz}$ , 1H), 3.73 (d,  $J = 2.4\text{ Hz}$ , 1H), 3.70 (t,  $J = 7.2\text{ Hz}$ , 2H), 2.10-1.98 (m, 1H), 1.84-1.76 (m, 2H), 1.65 (d,  $J = 5.0\text{ Hz}$ , 1H), 1.63-1.61 (m, 1H), 1.30 (d of sep,  $J = 13.2, 1.2\text{ Hz}$ , 1H);  $^{13}\text{C-NMR}$  ( $\text{CDCl}_3$ , 100 MHz) : 168.50, 133.97, 132.29, 123.27, 101.69, 66.97, 37.84, 32.49, 25.89, 23.24.

### 1-(4-Hydroxybutyl)pyrrolidine-2,5-dione (8)

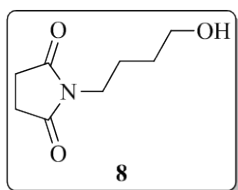

A mixture of finely powdered succinic anhydride (4.491 g, 44.873 mmol) and 4-amino-1-butanol (4.000 g, 44.873 mmol) were heated at  $170\text{ }^{\circ}\text{C}$  with vigorous stirring under nitrogen atmosphere. After 6 h the reaction mixture was cooled to room temperature and distilled under reduced pressure to give 1-(4-hydroxybutyl)pyrrolidine-2,5-dione in 70% yield (5.377 g) as

colorless viscous liquid. IR (KBr,  $\text{cm}^{-1}$ ) : 3448, 2942, 1764, 1695, 1250;  $^1\text{H-NMR}$  ( $\text{CDCl}_3$ , 400 MHz) :  $\delta$  3.67-3.62 (m, 2H), 3.56-3.51 (m, 2H), 2.69-2.68 (m, 4H), 1.69-1.61 (m, 2H), 1.58-1.51 (m, 2H);  $^{13}\text{C-NMR}$  ( $\text{CDCl}_3$ , 100 MHz) : 177.44, 62.16, 38.54, 29.69, 28.17, 24.24.

### 1-(3-(1,3-Dioxan-2-yl)propyl)pyrrolidine-2,5-dione (9)

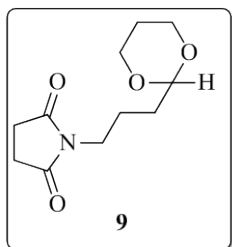

To a well stirred solution of oxalyl chloride (2.9 mL, 34.36 mmol) in 20 mL of  $\text{CH}_2\text{Cl}_2$ , a solution of anhydrous  $(\text{CH}_3)_2\text{SO}$  (5.8 mL, 82.16 mmol) in 20 mL of  $\text{CH}_2\text{Cl}_2$  was added under nitrogen atmosphere at  $-50^\circ\text{C}$  at such a rate that temperature was maintained at  $-50^\circ\text{C}$ . Stirring was continued for additional 15 min, then a solution of 1-(4-hydroxybutyl)pyrrolidine-2,5-dione (4.00 g, 23.37 mmol) in 40 mL of  $\text{CH}_2\text{Cl}_2$  was added while keeping the temperature at  $-50^\circ\text{C}$ . The reaction mixture was stirred for another 1 h at  $-50^\circ\text{C}$ , and triethylamine (21.93 mL, 157.23 mmol) was added. The mixture is allowed to warm to room temperature, and 200 mL of water was added and stirred for 30 min. The organic layer was separated and washed with water, dried over anhydrous  $\text{Na}_2\text{SO}_4$ , filtered and concentrated in vacuo. The crude 4-(2,5-dioxopyrrolidin-1-yl)butanal was obtained as viscous oil in 98% yield (3.87 g) and was stored under nitrogen atmosphere and used without further purification for the next step.

Propane-1,3-diol (4.73 g, 62.15 mmol) was added to a solution of 4-(2,5-dioxopyrrolidin-1-yl)butanal (3.5 g, 20.69 mmol) and *p*-toluenesulphonic acid monohydrate (0.196 g, 1.0344 mmol) in toluene (200 mL) at room temperature. The solution was stirred for 12 h, then diluted with ethyl acetate (200 mL) and washed with saturated  $\text{NaHCO}_3$  (60 mL). The layers were separated and the aqueous layer was extracted with ethyl acetate (4 x 50 mL). The combined organic layers were dried over anhydrous  $\text{MgSO}_4$ , filtered and concentrated under reduced pressure. The residue was purified through column chromatography using silica gel and ethyl acetate : hexane as eluent (1:1) to give 1-(3-(1,3-dioxan-2-yl)propyl)pyrrolidine-2,5-dione in 84% yield (4.256 g) as colorless solid. (m.p. :  $112-113^\circ\text{C}$ ); IR (KBr,  $\text{cm}^{-1}$ ) : 2861, 1763, 1695, 1238, 1145;  $^1\text{H-NMR}$  ( $\text{CDCl}_3$ , 400 MHz) :  $\delta$  4.51 (t,  $J = 5.0$  Hz, 1H), 4.05 (ddd,  $J = 12.4, 5.0, 1.2$  Hz, 2H), 3.72 (td,  $J = 12.4, 2.4$  Hz, 2H), 3.50 (t,  $J = 7.2$  Hz, 2H), 2.66 (s, 4H), 2.09-1.97 (m, 1H), 1.73-1.64 (m, 2H), 1.56 (dd,  $J = 8.8, 5.0$  Hz, 2H), 1.30 (d of sep,  $J = 13.5, 1.2$  Hz, 1H);  $^{13}\text{C-NMR}$  ( $\text{CDCl}_3$ , 100 MHz) : 177.17, 101.47, 66.82, 38.50, 32.28, 28.11, 25.72, 22.20.

### (C) General procedure for the synthesis of imide derivative of tryptamine

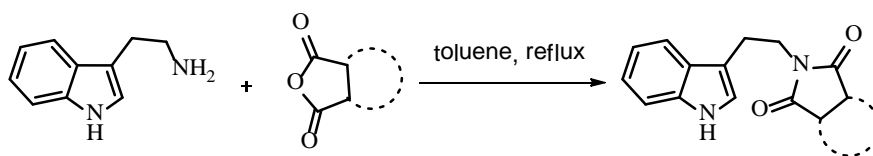

#### 2-(2-(1*H*-Indol-3-yl)ethyl)isoindoline-1,3-dione (**1a**)<sup>2</sup>

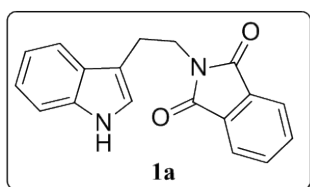

A suspension of phthalic anhydride (2.773 g, 18.725 mmol) in toluene in an oven dried round bottom flask fitted with Dean-Stark set up was heated at reflux until complete dissolution of the anhydride and no additional water was removed. To this solution was added tryptamine (3.000 g, 18.725 mmol) and refluxing was continued until the water evolution was completed (12 h). Reaction mixture was concentrated under reduced pressure to give a residue which was purified through neutral alumina column chromatography using ethyl acetate : hexane as eluent (1:4) to give 2-(2-(1*H*-indol-3-yl)ethyl)isoindoline-1,3-dione in 78% yield (4.240 g) as yellow solid. (m.p. : 166-167 °C, lit.<sup>2</sup> 166-168 °C); IR (KBr, cm<sup>-1</sup>) : 3383, 3044, 2942, 2858, 1767, 1703, 1233; <sup>1</sup>H-NMR (CDCl<sub>3</sub>, 400 MHz) : δ 8.05 (br s, 1H), 7.83 (dd, *J* = 5.4, 3.0 Hz, 2H), 7.74 (dt, *J* = 8.0, 0.8 Hz, 1H), 7.70 (dd, *J* = 5.4, 3.0 Hz, 2H), 7.34 (dt, *J* = 7.6, 0.8 Hz, 1H), 7.19 (td, *J* = 7.6, 1.2 Hz, 1H), 7.13 (td, *J* = 8.0, 1.2 Hz, 1H), 7.08 (d, *J* = 2.4 Hz, 1H), 4.04-3.99 (m, 2H), 3.19-3.15 (m, 2H); <sup>13</sup>C-NMR (CDCl<sub>3</sub>, 100 MHz) : 168.51, 136.37, 134.00, 132.34, 127.55, 123.31, 122.27, 122.14, 119.66, 119.01, 112.59, 111.24, 38.66, 24.60.

#### 1-(2-(1*H*-Indol-3-yl)ethyl)pyrrolidine-2,5-dione (**1i**)<sup>3</sup>

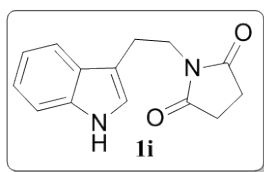

A suspension of succinic anhydride (1.874 g, 18.725 mmol) in toluene in an oven dried round bottom flask fitted with Dean-Stark set up was heated at reflux until complete dissolution of the anhydride and no additional water was removed. To this solution was added tryptamine (3.000 g, 18.725 mmol) and refluxing was continued until the water evolution was completed (12 h). Reaction mixture was concentrated under reduced pressure to give a residue which was purified through neutral alumina column chromatography using ethyl acetate : hexane as eluent (1:4) to give 1-(2-(1*H*-indol-3-yl)ethyl)pyrrolidine-2,5-dione in 71% yield (3.211 g) as tan solid. (m.p. : 166-167 °C, lit.<sup>3</sup> 163-166 °C); IR (KBr, cm<sup>-1</sup>) : 3265, 3052, 2925, 1764, 1694, 1401, 1339; <sup>1</sup>H-NMR (CDCl<sub>3</sub>, 400 MHz) : δ 8.04 (br s, 1H), 7.66 (d, *J* = 8.0 Hz, 1H),

7.34 (d,  $J = 8.0$  Hz, 1H), 7.19 (t,  $J = 7.6$  Hz, 1H), 7.13 (t,  $J = 7.6$  Hz, 1H), 7.08 (d,  $J = 1.9$  Hz, 1H), 3.83 (t,  $J = 7.6$  Hz, 2H), 3.06 (t,  $J = 7.6$  Hz, 2H), 2.61 (s, 4H);  $^{13}\text{C}$ -NMR ( $\text{CDCl}_3$ , 100 MHz) : 177.38, 136.29, 127.64, 122.27, 122.23, 119.67, 118.77, 112.41, 111.30, 39.65, 28.29, 23.45.

### 1-(2-(1*H*-Indol-3-yl)ethyl)piperidine-2,6-dione (**1r**)<sup>4</sup>

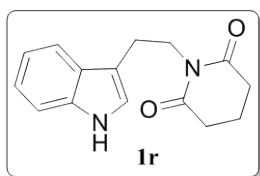

A suspension of glutaric anhydride (2.136 g, 18.725 mmol) in toluene in an oven dried round bottom flask fitted with Dean-Stark set up was heated at reflux until complete dissolution of the anhydride and no additional water was removed. To this solution was added tryptamine (3.000 g, 18.725 mmol) and refluxing was continued until the water evolution was completed (12 h). Reaction mixture was concentrated under reduced pressure to give a residue which was purified through neutral alumina column chromatography using ethyl acetate : hexane as eluent (1:4) to give 1-(2-(1*H*-indol-3-yl)ethyl)piperidine-2,6-dione in 67% yield (3.215 g) as tan solid. (m.p. : 174-175 °C), IR (KBr,  $\text{cm}^{-1}$ ) : 3333, 2971, 2958, 1718, 1665, 1456, 1354;  $^1\text{H}$ -NMR ( $\text{CDCl}_3$ , 400 MHz) :  $\delta$  8.02 (br s, 1H), 7.77 (d,  $J = 7.6$  Hz, 1H), 7.34 (d,  $J = 8.0$  Hz, 1H), 7.20-7.12 (m, 2H), 7.06 (d,  $J = 1.7$  Hz, 1H), 4.07 (t,  $J = 8.0$  Hz, 2H), 2.98 (t,  $J = 8.0$  Hz, 2H), 2.61 (t,  $J = 6.4$  Hz, 4H), 1.87 (p, 6.4 Hz, 2H);  $^{13}\text{C}$ -NMR ( $\text{CDCl}_3$ , 100 MHz) : 172.67, 136.27, 127.78, 122.25, 122.13, 119.56, 119.25, 113.06, 111.17, 40.45, 32.99, 23.84, 17.26.

### 2-(2-(1*H*-Indol-3-yl)ethyl)hexahydro-1*H*-isoindole-1,3(2*H*)-dione (**1q**)

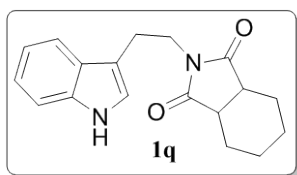

A suspension of hexahydrophthalic anhydride (2.887 g, 18.725 mmol) in toluene in an oven dried round bottom flask fitted with Dean-Stark set up was heated at reflux until complete dissolution of the anhydride and no additional water was removed. To this solution was added tryptamine (3.000 g, 18.725 mmol) and refluxing was continued until the water evolution was completed (12 h). Reaction mixture was concentrated under reduced pressure to give a residue which was purified through neutral alumina column chromatography using ethyl acetate : hexane as eluent (1:4) to give 2-(2-(1*H*-indol-3-yl)ethyl)hexahydro-1*H*-isoindole-1,3(2*H*)-dione in 63% yield (3.496 g) as pale orange solid. (m.p. : 145-146 °C); IR (KBr,  $\text{cm}^{-1}$ ) : 3364, 2944, 2860, 1766, 1694, 1401, 1341;  $^1\text{H}$ -NMR ( $\text{CDCl}_3$ , 400 MHz) :  $\delta$  8.02 (br s, 1H), 7.69 (d,  $J = 7.6$  Hz, 1H), 7.34 (d,  $J = 8.0$  Hz, 1H), 7.18 (t,  $J = 7.2$  Hz, 1H), 7.15-7.11 (m, 1H), 7.07 (d,  $J = 1.8$  Hz, 1H), 3.82 (t,  $J = 7.6$  Hz, 2H), 3.07

(t,  $J = 7.6$  Hz, 2H), 2.78-2.72 (m, 2H), 1.79-1.77 (m, 2H), 1.64-1.61 (m, 2H), 1.42-1.31 (m, 4H);  $^{13}\text{C}$ -NMR ( $\text{CDCl}_3$ , 100 MHz) : 179.98, 136.25, 127.63, 122.28, 122.13, 119.55, 118.93, 112.17, 111.21, 39.73, 39.12, 23.69, 23.37, 21.62.

#### (D) General procedure for the synthesis of imide derivative of substituted tryptamine

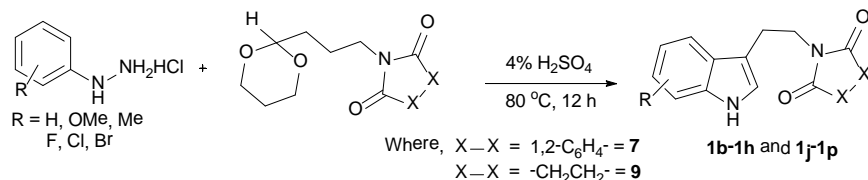

#### 2-(2-(5-Methoxy-1*H*-indol-3-yl)ethyl)isoindoline-1,3-dione (**1f**)<sup>5</sup>

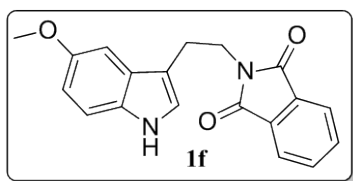

A mixture of (4-methoxyphenyl)hydrazine hydrochloride (349 mg, 1.998 mmol) and 2-(3-(1,3-dioxan-2-yl)propyl)isoindoline-1,3-dione (550 mg, 1.998 mmol) in 100 mL of 4%  $\text{H}_2\text{SO}_4$  was heated at reflux for 12 h. The reaction mixture was cooled to room temperature and treated with aqueous  $\text{NaHCO}_3$ . The tryptamine product was extracted with  $\text{CH}_2\text{Cl}_2$  (4 x 50 mL). The combined organic layer was dried over anhydrous  $\text{Na}_2\text{SO}_4$ , filtered and the solvent was evaporated under reduced pressure. The residue was purified through neutral alumina column chromatography using ethyl acetate : hexane (1:4) as eluent to give 2-(2-(5-methoxy-1*H*-indol-3-yl)ethyl)isoindoline-1,3-dione in 67% yield (429 mg) as yellow solid. (m.p. : 160-161 °C); IR (KBr,  $\text{cm}^{-1}$ ) : 3390, 2999, 2939, 2835, 1765, 1704, 1579, 1398, 1211, 1097;  $^1\text{H}$ -NMR ( $\text{CDCl}_3$ , 400 MHz) :  $\delta$  7.95 (br s, 1H), 7.83 (dd,  $J = 5.4$ , 3.0 Hz, 2H), 7.70 (dd,  $J = 5.4$ , 3.0 Hz, 2H), 7.22 (d,  $J = 8.8$  Hz, 1H), 7.16 (d,  $J = 2.4$  Hz, 1H), 7.06 (d,  $J = 2.4$  Hz, 1H), 6.83 (dd,  $J = 8.8$ , 2.4 Hz, 1H), 4.02-3.98 (m, 2H), 3.86 (s, 3H), 3.14-3.10 (m, 2H);  $^{13}\text{C}$ -NMR ( $\text{CDCl}_3$ , 100 MHz) : 168.39, 154.08, 133.87, 132.19, 131.30, 127.81, 123.16, 122.74, 112.57, 112.20, 111.89, 100.31, 55.82, 38.44, 24.50.

#### 2-(2-(7-Methyl-1*H*-indol-3-yl)ethyl)isoindoline-1,3-dione (**1g**)

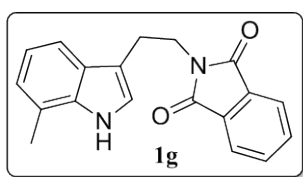

A mixture of *o*-tolylhydrazine hydrochloride (317 mg, 1.998 mmol) and 2-(3-(1,3-dioxan-2-yl)propyl)isoindoline-1,3-dione (550 mg, 1.998 mmol) in 100 mL of 4%  $\text{H}_2\text{SO}_4$  was heated at reflux for 12 h. The reaction mixture was cooled to room temperature and treated with aqueous  $\text{NaHCO}_3$ . The tryptamine product was extracted with



CH<sub>2</sub>Cl<sub>2</sub> (4 x 50 mL). The combined organic layer was dried over anhydrous Na<sub>2</sub>SO<sub>4</sub>, filtered and the solvent was evaporated under reduced pressure. The residue was purified through neutral alumina column chromatography using ethyl acetate : hexane (1:4) as eluent to give 2-(2-(7-methyl-1*H*-indol-3-yl)ethyl)isoindoline-1,3-dione in 64% yield (389 mg) as orange solid. (m.p. : 208-209 °C); IR (KBr, cm<sup>-1</sup>) : 3391, 3045, 2931, 2857, 1760, 1703, 1438, 1072; <sup>1</sup>H-NMR (CDCl<sub>3</sub>, 400 MHz) : δ 7.95 (br s, 1H), 7.83 (dd, *J* = 5.4, 3.0 Hz, 2H), 7.70 (dd, *J* = 5.4, 3.0 Hz, 2H), 7.60 (d, *J* = 7.6 Hz, 1H), 7.11 (d, *J* = 2.0 Hz, 1H), 7.06 (t, *J* = 7.6 Hz, 1H), 6.99 (d, *J* = 7.0 Hz, 1H), 4.03-3.99 (m, 2H), 3.15 (t, *J* = 7.6 Hz, 2H), 2.48 (s, 3H); <sup>13</sup>C-NMR (CDCl<sub>3</sub>, 100 MHz) : 168.52, 135.97, 134.00, 132.35, 127.08, 123.32, 122.82, 121.86, 120.39, 119.90, 116.76, 113.08, 38.68, 24.75, 16.71.

### 2-(2-(5,7-Dimethyl-1*H*-indol-3-yl)ethyl)isoindoline-1,3-dione (1h)

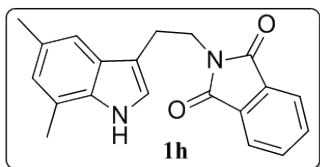

A mixture of (2,4-dimethylphenyl)hydrazine hydrochloride (345 mg, 1.998 mmol) and 2-(3-(1,3-dioxan-2-yl)propyl)isoindoline-1,3-dione (550 mg, 1.998 mmol) in 100 mL of 4% H<sub>2</sub>SO<sub>4</sub> was heated at reflux for 12 h. The reaction mixture was cooled to room temperature and treated with aqueous NaHCO<sub>3</sub>. The tryptamine product was extracted with CH<sub>2</sub>Cl<sub>2</sub> (4 x 50 mL). The combined organic layer was dried over anhydrous Na<sub>2</sub>SO<sub>4</sub>, filtered and the solvent was evaporated under reduced pressure. The residue was purified through neutral alumina column chromatography using ethyl acetate : hexane (1:4) as eluent to give 2-(2-(5,7-dimethyl-1*H*-indol-3-yl)ethyl)isoindoline-1,3-dione in 59% yield (375 mg) as pale brown solid. (m.p. : 221-222 °C); IR (KBr, cm<sup>-1</sup>) : 3380, 2919, 2856, 1766, 1705, 1608, 1442, 1086; <sup>1</sup>H-NMR (CDCl<sub>3</sub>, 400 MHz) : δ 7.87 (br s, 1H), 7.83 (dd, *J* = 5.4, 3.0 Hz, 2H), 7.70 (dd, *J* = 5.4, 3.0 Hz, 2H), 7.34 (s, 1H), 7.06 (d, *J* = 1.7 Hz, 1H), 6.82 (s, 1H), 3.99 (t, *J* = 7.6 Hz, 2H), 3.12 (t, *J* = 7.6 Hz, 2H), 2.43 (s, 3H), 2.40 (s, 3H); <sup>13</sup>C-NMR (CDCl<sub>3</sub>, 100 MHz) : 168.53, 134.27, 133.96, 132.35, 129.12, 127.33, 124.54, 123.27, 122.02, 120.05, 116.25, 112.55, 38.79, 24.73, 21.54, 16.64.

### 2-(2-(5-Fluoro-1*H*-indol-3-yl)ethyl)isoindoline-1,3-dione (1b)<sup>6</sup>

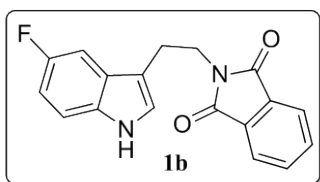

A mixture of (4-fluorophenyl)hydrazine hydrochloride (325 mg, 1.998 mmol) and 2-(3-(1,3-dioxan-2-yl)propyl)isoindoline-1,3-dione (550 mg, 1.998 mmol) in 100 mL of 4% H<sub>2</sub>SO<sub>4</sub> was heated at reflux for 12 h. The reaction mixture was cooled to room

temperature and treated with aqueous NaHCO<sub>3</sub>. The tryptamine product was extracted with CH<sub>2</sub>Cl<sub>2</sub> (4 x 50 mL). The combined organic layer was dried over anhydrous Na<sub>2</sub>SO<sub>4</sub>, filtered and the solvent was evaporated under reduced pressure. The residue was purified through neutral alumina column chromatography using ethyl acetate : hexane (1:4) as eluent to give 2-(2-(5-fluoro-1*H*-indol-3-yl)ethyl)isoindoline-1,3-dione in 75% yield (462 mg) as pale yellow solid. (m.p. : 125-126 °C, lit.<sup>6</sup> 122-124 °C); IR (KBr, cm<sup>-1</sup>) : 3390, 3048, 2934, 1766, 1702, 1448, 1402, 1247, 716; <sup>1</sup>H-NMR (CDCl<sub>3</sub>, 400 MHz) : δ 8.04 (br s, 1H), 7.83 (dd, *J* = 5.4, 3.0 Hz, 2H), 7.70 (dd, *J* = 5.4, 3.0 Hz, 2H), 7.34 (dd, *J* = 9.6, 2.4 Hz, 1H), 7.24 (t, *J* = 4.4 Hz, 1H), 7.12 (d, *J* = 2.0 Hz, 1H), 6.91 (td, *J* = 9.0, 2.4 Hz, 1H), 3.98 (t, *J* = 7.6 Hz, 2H), 3.10 (t, *J* = 7.6 Hz, 2H); <sup>13</sup>C-NMR (CDCl<sub>3</sub>, 100 MHz) : 168.33, 157.81 (d, *J* = 233.5 Hz, 1C), 133.90, 132.68, 132.12, 127.82 (d, *J* = 9.8 Hz, 1C), 123.79, 123.19, 112.63 (d, *J* = 4.6 Hz, 1C), 111.72 (d, *J* = 9.5 Hz, 1C), 110.52 (d, *J* = 26.2 Hz, 1C), 103.75 (d, *J* = 23.3 Hz, 1C), 38.33, 24.33.

### 2-(2-(5-Chloro-1*H*-indol-3-yl)ethyl)isoindoline-1,3-dione (1c)

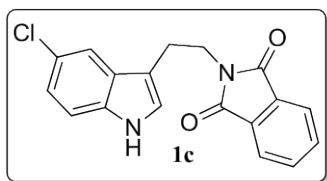

A mixture of (4-chlorophenyl)hydrazine hydrochloride (358 mg, 1.998 mmol) and 2-(3-(1,3-dioxan-2-yl)propyl)isoindoline-1,3-dione (550 mg, 1.998 mmol) in 100 mL of 4% H<sub>2</sub>SO<sub>4</sub> was heated at reflux for 12 h. The reaction mixture was cooled to room temperature and treated with aqueous NaHCO<sub>3</sub>. The tryptamine product was extracted with CH<sub>2</sub>Cl<sub>2</sub> (4 x 50 mL). The combined organic layer was dried over anhydrous Na<sub>2</sub>SO<sub>4</sub>, filtered and the solvent was evaporated under reduced pressure. The residue was purified through neutral alumina column chromatography using ethyl acetate : hexane (1:4) as eluent to give 2-(2-(5-chloro-1*H*-indol-3-yl)ethyl)isoindoline-1,3-dione in 62% yield (402 mg) as pale yellow solid. (m.p. : 195-196 °C); IR (KBr, cm<sup>-1</sup>) : 3340, 1769, 1702, 1610, 1450, 1402, 1238, 721; <sup>1</sup>H-NMR (CDCl<sub>3</sub>, 400 MHz) : δ 8.05 (br s, 1H), 7.83 (dd, *J* = 5.4, 3.0 Hz, 2H), 7.70 (dd, *J* = 5.4, 3.0 Hz, 2H), 7.64 (d, *J* = 1.3 Hz, 1H), 7.24 (d, *J* = 8.0 Hz, 1H), 7.13-7.11 (m, 2H), 3.98 (t, *J* = 7.6 Hz, 2H), 3.11 (t, *J* = 7.6 Hz, 2H); <sup>13</sup>C-NMR (CDCl<sub>3</sub>, 100 MHz) : 168.47, 134.67, 134.06, 132.24, 128.70, 125.46, 123.56, 123.35, 122.57, 118.48, 112.47, 112.26, 38.56, 24.35.

### 2-(2-(5-Bromo-1*H*-indol-3-yl)ethyl)isoindoline-1,3-dione (1d)

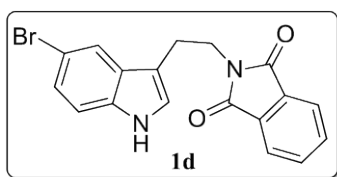

A mixture of (4-bromophenyl)hydrazine hydrochloride (430 mg, 1.943 mmol) and 2-(3-(1,3-dioxan-2-yl)propyl)isoindoline-1,3-dione (535 mg, 1.943 mmol) in 100 mL of 4% H<sub>2</sub>SO<sub>4</sub> was heated at reflux for 12 h. The reaction mixture was cooled to room temperature and treated with aqueous NaHCO<sub>3</sub>. The tryptamine product was extracted with CH<sub>2</sub>Cl<sub>2</sub> (4 x 50 mL). The combined organic layer was dried over anhydrous Na<sub>2</sub>SO<sub>4</sub>, filtered and the solvent was evaporated under reduced pressure. The residue was purified through neutral alumina column chromatography using ethyl acetate : hexane (1:4) as eluent to give 2-(2-(5-bromo-1*H*-indol-3-yl)ethyl)isoindoline-1,3-dione in 72% yield (517 mg) as pale orange solid. (m.p. : 212-213 °C); IR (KBr, cm<sup>-1</sup>) : 3318, 3048, 2934, 2860, 1764, 1695, 1458, 1389, 1230, 719; <sup>1</sup>H-NMR (CDCl<sub>3</sub>, 400 MHz) : δ 8.05 (br s, 1H), 7.82 (dd, *J* = 5.4, 3.0 Hz, 2H), 7.79-7.78 (m, 1H), 7.70 (dd, *J* = 5.4, 3.0 Hz, 2H), 7.23 (dd, *J* = 8.8, 1.6 Hz, 1H), 7.19 (dd, *J* = 8.8, 0.4 Hz, 1H), 7.09 (d, *J* = 2.3 Hz, 1H), 4.00-3.96 (m, 2H), 3.13-3.09 (m, 2H); <sup>13</sup>C-NMR (DMSO-*d*<sub>6</sub>, 100 MHz) : 167.75, 134.82, 134.33, 131.52, 128.90, 124.77, 123.36, 122.95, 120.31, 113.42, 111.00, 110.53, 38.16, 23.52.

### 2-(2-(7-Fluoro-1*H*-indol-3-yl)ethyl)isoindoline-1,3-dione (1e)

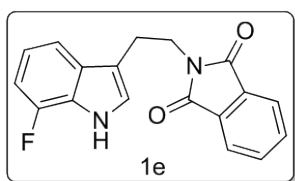

A mixture of (2-fluorophenyl)hydrazine hydrochloride (325 mg, 1.998 mmol) and 2-(3-(1,3-dioxan-2-yl)propyl)isoindoline-1,3-dione (550 mg, 1.998 mmol) in 100 mL of 4% H<sub>2</sub>SO<sub>4</sub> was heated at reflux for 12 h. The reaction mixture was cooled to room temperature and treated with aqueous NaHCO<sub>3</sub>. The tryptamine product was extracted with CH<sub>2</sub>Cl<sub>2</sub> (4 x 50 mL). The combined organic layer was dried over anhydrous Na<sub>2</sub>SO<sub>4</sub>, filtered and the solvent was evaporated under reduced pressure. The residue was purified through neutral alumina column chromatography using ethyl acetate : hexane (1:4) as eluent to give 2-(2-(5-fluoro-1*H*-indol-3-yl)ethyl)isoindoline-1,3-dione in 68% yield (419 mg) as orange solid. (m.p. : 199-200 °C); IR (KBr, cm<sup>-1</sup>) : 3358, 2944, 1768, 1704, 1429, 1228, 715; <sup>1</sup>H-NMR (CDCl<sub>3</sub>, 400 MHz) : δ 8.24 (br s, 1H), 7.83 (dd, *J* = 5.4, 3.0 Hz, 2H), 7.70 (dd, *J* = 5.4, 3.0 Hz, 2H), 7.47 (d, *J* = 8.0 Hz, 1H), 7.11 (d, *J* = 2.4 Hz, 1H), 7.01 (td, *J* = 8.0, 4.8 Hz, 1H), 6.91-6.86 (m, 1H), 4.02-3.98 (m, 2H), 3.16-3.13 (m, 2H); <sup>13</sup>C-NMR (CDCl<sub>3</sub>, 100 MHz) : 168.48, 149.69 (d, *J* = 242.3 Hz, 1C), 134.05, 132.26, 131.31 (d, *J* = 5.2 Hz, 1C), 124.68 (d, *J* = 13.2 Hz, 1C), 123.34, 122.85, 119.90 (d, *J* = 6.3 Hz, 1C), 114.76 (d, *J* = 3.5 Hz, 1C), 113.41 (d, *J* = 2.2 Hz, 1C), 107.08 (d, *J* = 15.9 Hz, 1C), 38.52, 24.57.

### 1-(2-(5-Methoxy-1*H*-indol-3-yl)ethyl)pyrrolidine-2,5-dione (**1n**)<sup>4</sup>

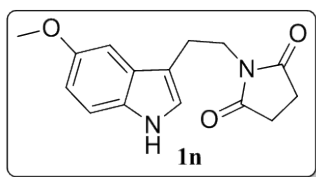

A mixture of (4-methoxyphenyl)hydrazine hydrochloride (231 mg, 1.320 mmol) and 1-(3-(1,3-dioxan-2-yl)propyl)pyrrolidine-2,5-dione (300 mg, 1.320 mmol) in 100 mL of 4% H<sub>2</sub>SO<sub>4</sub> was heated at reflux for 12 h. The reaction mixture was cooled to room temperature and treated with aqueous NaHCO<sub>3</sub>. The tryptamine product was extracted with CH<sub>2</sub>Cl<sub>2</sub> (4 x 50 mL). The combined organic layer was dried over anhydrous Na<sub>2</sub>SO<sub>4</sub>, filtered and the solvent was evaporated under reduced pressure. The residue was purified through neutral alumina column chromatography using ethyl acetate : hexane (1:4) as eluent to give 1-(2-(5-methoxy-1*H*-indol-3-yl)ethyl)pyrrolidine-2,5-dione in 61% yield (219 mg) as pale tan solid. (m.p. : 169-170 °C); IR (KBr, cm<sup>-1</sup>) : 3424, 2951, 1761, 1696, 1487, 1404, 1227, 1153; <sup>1</sup>H-NMR (CDCl<sub>3</sub>, 400 MHz) : δ 7.98 (br s, 1H), 7.28 (d, *J* = 6.1 Hz, 1H), 7.18 (d, *J* = 2.4 Hz, 1H), 7.09 (d, *J* = 2.1 Hz, 1H), 6.89 (dd, *J* = 8.8, 2.4 Hz, 1H), 3.93 (s, 3H), 3.85 (t, *J* = 8.0 Hz, 2H), 3.05 (t, *J* = 8.0 Hz, 2H), 2.67 (s, 4H); <sup>13</sup>C-NMR (CDCl<sub>3</sub>, 100 MHz) : 177.31, 154.08, 131.24, 127.86, 122.84, 112.49, 111.95, 111.91, 100.24, 55.87, 39.29, 28.18, 23.40.

### 1-(2-(7-Methyl-1*H*-indol-3-yl)ethyl)pyrrolidine-2,5-dione (**1o**)<sup>4</sup>

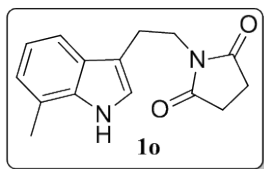

A mixture of *o*-tolylhydrazine hydrochloride (349 mg, 2.200 mmol) and 1-(3-(1,3-dioxan-2-yl)propyl)pyrrolidine-2,5-dione (500 mg, 2.200 mmol) in 100 mL of 4% H<sub>2</sub>SO<sub>4</sub> was heated at reflux for 12 h. The reaction mixture was cooled to room temperature and treated with aqueous NaHCO<sub>3</sub>. The tryptamine product was extracted with CH<sub>2</sub>Cl<sub>2</sub> (4 x 50 mL). The combined organic layer was dried over anhydrous Na<sub>2</sub>SO<sub>4</sub>, filtered and the solvent was evaporated under reduced pressure. The residue was purified through neutral alumina column chromatography using ethyl acetate : hexane (1:4) as eluent to give 1-(2-(7-methyl-1*H*-indol-3-yl)ethyl)pyrrolidine-2,5-dione in 66% yield (372 mg) as colorless solid. (m.p. : 172-173 °C); IR (KBr, cm<sup>-1</sup>) : 3272, 1770, 1694, 1405, 1343; <sup>1</sup>H-NMR (CDCl<sub>3</sub>, 400 MHz) : δ 7.97 (br s, 1H), 7.51 (d, *J* = 8.0 Hz, 1H), 7.09 (d, *J* = 2.2 Hz, 1H), 7.06 (t, *J* = 8.0 Hz, 1H), 6.99 (d, *J* = 7.2 Hz, 1H), 3.85-3.81 (m, 2H), 3.07-3.03 (m, 2H), 2.62 (s, 4H), 2.47 (s, 3H); <sup>13</sup>C-NMR (CDCl<sub>3</sub>, 100 MHz) : 177.39, 135.88, 127.15, 122.76, 121.96, 120.45, 119.86, 116.47, 112.83, 39.67, 28.27, 23.58, 16.69.

### 1-(2-(5,7-Dimethyl-1*H*-indol-3-yl)ethyl)pyrrolidine-2,5-dione (**1p**)

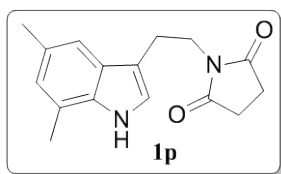

A mixture of (2,4-dimethylphenyl)hydrazine hydrochloride (380 mg, 2.200 mmol) and 1-(3-(1,3-dioxan-2-yl)propyl)pyrrolidine-2,5-dione (500 mg, 2.200 mmol) in 100 mL of 4% H<sub>2</sub>SO<sub>4</sub> was heated at reflux for 12 h. The reaction mixture was cooled to room temperature and treated with aqueous NaHCO<sub>3</sub>. The tryptamine product was extracted with CH<sub>2</sub>Cl<sub>2</sub> (4 x 50 mL). The combined organic layer was dried over anhydrous Na<sub>2</sub>SO<sub>4</sub>, filtered and the solvent was evaporated under reduced pressure. The residue was purified through neutral alumina column chromatography using ethyl acetate : hexane (1:4) as eluent to give 1-(2-(5,7-dimethyl-1*H*-indol-3-yl)ethyl)pyrrolidine-2,5-dione in 55% yield (327 mg) as pale yellow solid. (m.p. : 192-193 °C); IR (KBr, cm<sup>-1</sup>) : 3348, 3125, 2860, 1769, 1691, 1405, 1264; <sup>1</sup>H-NMR (CDCl<sub>3</sub>, 400 MHz) : δ 7.84 (br s, 1H), 7.28 (s, 1H), 7.05 (d, *J* = 2.2 Hz, 1H), 6.83 (s, 1H), 3.83-3.79 (m, 2H), 3.03-3.00 (m, 2H), 2.62 (s, 4H), 2.43 (s, 6H); <sup>13</sup>C-NMR (CDCl<sub>3</sub>, 100 MHz) : 177.26, 134.09, 128.98, 127.27, 124.42, 121.95, 119.97, 115.88, 112.25, 39.58, 28.15, 23.47, 21.45, 16.51.

### 1-(2-(5-Fluoro-1*H*-indol-3-yl)ethyl)pyrrolidine-2,5-dione (**1j**)<sup>4</sup>

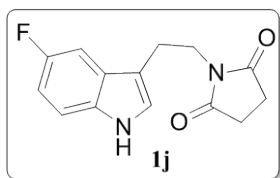

A mixture of (4-fluorophenyl)hydrazine hydrochloride (122 mg, 0.748 mmol) and 1-(3-(1,3-dioxan-2-yl)propyl)pyrrolidine-2,5-dione (170 mg, 0.748 mmol) in 100 mL of 4% H<sub>2</sub>SO<sub>4</sub> was heated at reflux for 12 h. The reaction mixture was cooled to room temperature and treated with aqueous NaHCO<sub>3</sub>. The tryptamine product was extracted with CH<sub>2</sub>Cl<sub>2</sub> (4 x 50 mL). The combined organic layer was dried over anhydrous Na<sub>2</sub>SO<sub>4</sub>, filtered and the solvent was evaporated under reduced pressure. The residue was purified through neutral alumina column chromatography using ethyl acetate : hexane (1:4) as eluent to give 1-(2-(5-fluoro-1*H*-indol-3-yl)ethyl)pyrrolidine-2,5-dione in 73% yield (142 mg) as tan solid. (m.p. : 136-137 °C); IR (KBr, cm<sup>-1</sup>) : 3344, 2935, 2860, 1773, 1697, 1486, 1404, 1260, 1152, 805; <sup>1</sup>H-NMR (CDCl<sub>3</sub>, 400 MHz) : δ 8.14 (br s, 1H), 7.30-7.23 (m, 2H), 7.10 (d, *J* = 1.4 Hz, 1H), 6.92 (td, *J* = 9.0, 2.2 Hz, 1H), 3.79 (t, *J* = 7.6 Hz, 2H), 2.99 (t, *J* = 7.6 Hz, 2H), 2.63 (s, 4H); <sup>13</sup>C-NMR (CDCl<sub>3</sub>, 100 MHz) : 177.35, 157.96 (d, *J* = 234.0 Hz, 1C), 132.77, 128.03 (d, *J* = 9.0 Hz, 1C), 124.03, 112.60 (d, *J* = 4.0 Hz, 1C), 111.97 (d, *J* = 9.0 Hz, 1C), 110.66 (d, *J* = 27.0 Hz, 1C), 103.64 (d, *J* = 23.0 Hz, 1C), 39.46, 28.27, 23.38.

### 1-(2-(5-Chloro-1*H*-indol-3-yl)ethyl)pyrrolidine-2,5-dione (**1k**)

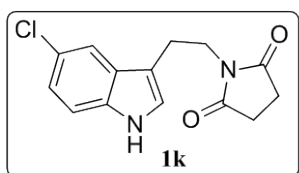

A mixture of (4-chlorophenyl)hydrazine hydrochloride (197 mg, 1.100 mmol) and 1-(3-(1,3-dioxan-2-yl)propyl)pyrrolidine-2,5-dione (250 mg, 1.100 mmol) in 100 mL of 4% H<sub>2</sub>SO<sub>4</sub> was heated at reflux for 12 h. The reaction mixture was cooled to room temperature and treated with aqueous NaHCO<sub>3</sub>. The tryptamine product was extracted with CH<sub>2</sub>Cl<sub>2</sub> (4 x 50 mL). The combined organic layer was dried over anhydrous Na<sub>2</sub>SO<sub>4</sub>, filtered and the solvent was evaporated under reduced pressure. The residue was purified through neutral alumina column chromatography using ethyl acetate : hexane (1:4) as eluent to give 1-(2-(5-chloro-1*H*-indol-3-yl)ethyl)pyrrolidine-2,5-dione in 71% yield (216 mg) as pale yellow solid. (m.p. : 145-146 °C); IR (KBr, cm<sup>-1</sup>) : 3420, 2922, 1763, 1686, 1462, 1409, 1267; <sup>1</sup>H-NMR (CDCl<sub>3</sub>, 400 MHz) : δ 8.20 (br s, 1H), 7.59 (d, *J* = 1.9 Hz, 1H), 7.28 (d, *J* = 0.8 Hz, 1H), 7.14 (dd, *J* = 8.6, 1.9 Hz, 1H), 7.10 (d, *J* = 2.2 Hz, 1H), 3.82 (t, *J* = 7.6 Hz, 2H), 3.03 (t, *J* = 7.6 Hz, 2H), 2.64 (s, 4H); <sup>13</sup>C-NMR (CDCl<sub>3</sub>, 100 MHz) : 177.39, 134.58, 128.77, 125.38, 123.67, 122.52, 118.14, 112.38, 112.28, 39.59, 28.24, 23.22.

### 1-(2-(5-Bromo-1*H*-indol-3-yl)ethyl)pyrrolidine-2,5-dione (1l)<sup>4</sup>

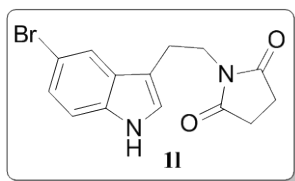

A mixture of (4-bromophenyl)hydrazine hydrochloride (171 mg, 0.770 mmol) and 1-(3-(1,3-dioxan-2-yl)propyl)pyrrolidine-2,5-dione (175 mg, 0.770 mmol) in 100 mL of 4% H<sub>2</sub>SO<sub>4</sub> was heated at reflux for 12 h. The reaction mixture was cooled to room temperature and treated with aqueous NaHCO<sub>3</sub>. The tryptamine product was extracted with CH<sub>2</sub>Cl<sub>2</sub> (4 x 50 mL). The combined organic layer was dried over anhydrous Na<sub>2</sub>SO<sub>4</sub>, filtered and the solvent was evaporated under reduced pressure. The residue was purified through neutral alumina column chromatography using ethyl acetate : hexane (1:4) as eluent to give 1-(2-(5-bromo-1*H*-indol-3-yl)ethyl)pyrrolidine-2,5-dione in 53% yield (131 mg) as tan solid. (m.p. : 138-139 °C); IR (KBr, cm<sup>-1</sup>) : 3318, 2919, 2854, 1767, 1699, 1336, 666; <sup>1</sup>H-NMR (CDCl<sub>3</sub>, 400 MHz) : δ 8.28 (br s, 1H), 7.71 (s, 1H), 7.25-7.18 (m, 2H), 7.04 (s, 1H), 3.78 (t, *J* = 7.2 Hz, 2H), 2.99 (t, *J* = 7.2 Hz, 2H), 2.61 (s, 4H); <sup>13</sup>C-NMR (CDCl<sub>3</sub>, 100 MHz) : 177.43, 134.84, 129.42, 124.97, 123.54, 121.15, 112.86, 112.80, 112.13, 39.65, 28.22, 23.17.

### 1-(2-(7-Fluoro-1*H*-indol-3-yl)ethyl)pyrrolidine-2,5-dione (1m)

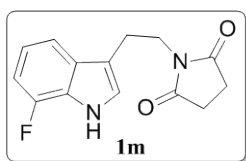

A mixture of (2-fluorophenyl)hydrazine hydrochloride (122 mg, 0.748 mmol) and 1-(3-(1,3-dioxan-2-yl)propyl)pyrrolidine-2,5-dione (170 mg, 0.748 mmol) in 100 mL of 4% H<sub>2</sub>SO<sub>4</sub> was heated at reflux for 12

h. The reaction mixture was cooled to room temperature and treated with aqueous NaHCO<sub>3</sub>. The tryptamine product was extracted with CH<sub>2</sub>Cl<sub>2</sub> (4 x 50 mL). The combined organic layer was dried over anhydrous Na<sub>2</sub>SO<sub>4</sub>, filtered and the solvent was evaporated under reduced pressure. The residue was purified through neutral alumina column chromatography using ethyl acetate : hexane (1:4) as eluent to give 1-(2-(7-fluoro-1*H*-indol-3-yl)ethyl)pyrrolidine-2,5-dione in 69% yield (98 mg) as pale yellow solid. (m.p. : 170-171 °C); IR (KBr, cm<sup>-1</sup>) : 3282, 2943, 1770, 1699, 1448, 1336, 796; <sup>1</sup>H-NMR (CDCl<sub>3</sub>, 400 MHz) : δ 8.29 (br s, 1H), 7.41 (d, *J* = 8.0 Hz, 1H), 7.10 (d, *J* = 2.3 Hz, 1H), 7.03 (td, *J* = 8.0, 4.8 Hz, 1H), 6.92-6.87 (m, 1H), 3.84-3.80 (m, 2H), 3.06-3.03 (m, 2H), 2.62 (s, 4H); <sup>13</sup>C-NMR (CDCl<sub>3</sub>, 100 MHz) : 177.33, 149.73 (d, *J* = 243.0 Hz, 1C), 131.39 (d, *J* = 5.0 Hz, 1C), 124.65 (d, *J* = 13.0 Hz, 1C), 122.93, 119.97 (d, *J* = 6.0 Hz, 1C), 114.57 (d, *J* = 4.0 Hz, 1C), 113.30 (d, *J* = 2.0 Hz, 1C), 107.08 (d, *J* = 16.0 Hz, 1C), 39.51, 28.29, 23.46.

### (E) General procedure for the synthesis of benzindolizino indolones.

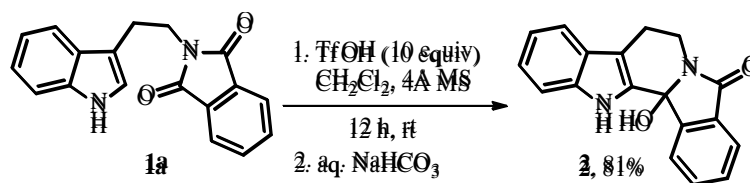

### 13b-Hydroxy-7,8,13,13b-tetrahydro-5*H*-benzo[1,2]indolizino[8,7-*b*]indol-5-one (2)

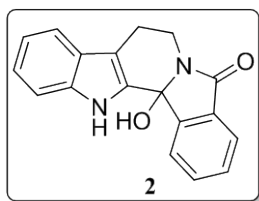

A 50 mL two neck round bottom flask fitted with condenser and rubber septum was charged with 2-(2-(1*H*-indol-3-yl)ethyl)isoindoline-1,3-dione (110 mg, 0.379 mmol), 4Å molecular sieves (50 mg), magnetic stir bar and anhydrous dichloromethane (20 mL) under nitrogen atmosphere. To this mixture was added trifluoromethanesulfonic acid (335 μL, 3.789 mmol) with stirring at room temperature. After 12 h the reaction mixture was quenched with aqueous NaHCO<sub>3</sub>. Organic layer was separated and aqueous layer was extracted with ethyl acetate (3 x 50 mL). The combined organic layer was washed with aqueous NaHCO<sub>3</sub>, dried over anhydrous Na<sub>2</sub>SO<sub>4</sub> and filtered. The solvent was removed under reduced pressure. The crude mixture was purified through neutral alumina column chromatography using ethyl acetate as eluent to give 13b-hydroxy-7,8,13,13b-tetrahydro-5*H*-benzo[1,2]indolizino[8,7-*b*]indol-5-one in 81% yield (86 mg) as colorless solid. (m.p. : 163-

164 °C); IR (KBr,  $\text{cm}^{-1}$ ) : 3350, 3226, 2924, 1682, 1409, 1300;  $^1\text{H-NMR}$  ( $\text{DMSO-}d_6$ , 400 MHz) :  $\delta$  11.51 (br s, 1H), 8.32 (d,  $J = 7.6$  Hz, 1H), 7.72 (t,  $J = 7.6$  Hz, 1H), 7.68 (d,  $J = 7.6$  Hz, 1H), 7.55 (t,  $J = 7.2$  Hz, 1H), 7.42 (d,  $J = 7.6$  Hz, 1H), 7.36 (d,  $J = 8.4$  Hz, 1H), 7.26 (s, 1H), 7.13-7.09 (m, 1H), 6.98 (t,  $J = 7.2$  Hz, 1H), 4.41 (dd,  $J = 13.0, 5.6$  Hz, 1H), 3.47 (td,  $J = 12.1, 4.4$  Hz, 1H), 2.79 (dd,  $J = 15.6, 4.4$  Hz, 1H), 2.73-2.65 (m, 1H);  $^{13}\text{C-NMR}$  ( $\text{DMSO-}d_6$ , 100 MHz) : 166.70, 147.07, 136.56, 133.14, 132.64, 130.38, 129.76, 125.64, 123.78, 122.92, 122.42, 119.12, 118.99, 111.71, 109.06, 84.23, 35.10, 21.63; HRMS (ESI) ( $m/z$ ) :  $[\text{M}+\text{Na}]^+$  Found 313.0958; Calculated 313.0953; for  $\text{C}_{18}\text{H}_{14}\text{N}_2\text{O}_2\text{Na}$ .

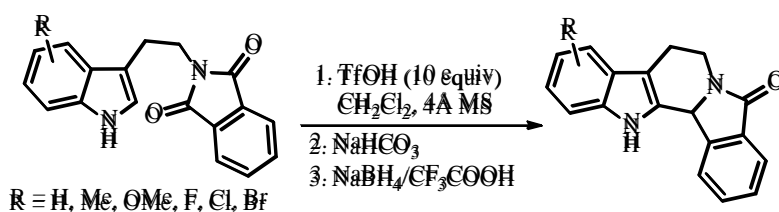

### 7,8,13,13b-Tetrahydro-5H-benzo[1,2]indolizino[8,7-b]indol-5-one (2a)<sup>3</sup>

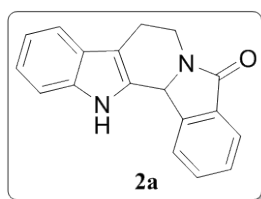

A 50 mL two neck round bottom flask fitted with condenser and rubber septum was charged with 2-(2-(1H-indol-3-yl)ethyl)isoindoline-1,3-dione (110 mg, 0.379 mmol), 4Å molecular sieves (50 mg), magnetic stir bar and anhydrous dichloromethane (20 mL) under nitrogen atmosphere. To this mixture was added trifluoromethanesulfonic acid (335  $\mu\text{L}$ , 3.789 mmol) with stirring at room temperature. After 12 h the reaction mixture was neutralized with solid  $\text{NaHCO}_3$  (350 mg, 4.168 mmol). After 15 min., to this crude reaction mixture was added  $\text{NaBH}_4$  (64 mg, 1.705 mmol) and  $\text{CF}_3\text{COOH}$  (392  $\mu\text{L}$ , 5.115 mmol) under nitrogen atmosphere with vigorous stirring at room temperature. After 12 h the reaction mixture was quenched with aqueous  $\text{NaHCO}_3$ . Organic layer was separated and aqueous layer was extracted with ethyl acetate (3 x 50 mL). The combined organic layer was washed with aqueous  $\text{NaHCO}_3$ , dried over anhydrous  $\text{Na}_2\text{SO}_4$  and filtered. The solvent was removed under reduced pressure. The crude mixture was purified through neutral alumina column chromatography using ethyl acetate : hexane (4:1) mixture as eluent to give 7,8,13,13b-tetrahydro-5H-benzo[1,2]indolizino[8,7-b]indol-5-one in 83% yield (86 mg) as pale yellow solid. (m.p. : 215-216 °C, lit.<sup>3</sup> 212-214 °C); IR (KBr,  $\text{cm}^{-1}$ ) : 3225, 2932, 2841, 1670, 1461;  $^1\text{H-NMR}$  ( $\text{CDCl}_3$ , 400 MHz) :  $\delta$  8.51 (br s, 1H), 7.90 (d,  $J = 7.6$  Hz, 1H), 7.84 (d,  $J = 7.6$  Hz, 1H), 7.61 (td,  $J = 7.6, 1.0$  Hz, 1H), 7.49 (t,  $J = 8.0$  Hz, 2H), 7.37 (d,  $J = 8.0$  Hz, 1H), 7.18 (td,



$J = 8.0, 1.0$  Hz, 1H), 7.10 (td,  $J = 7.6, 1.0$  Hz, 1H), 5.84 (s, 1H), 4.87 (dd,  $J = 13.2, 5.6$  Hz, 1H), 3.41 (ddd,  $J = 13.2, 11.2, 5.2$  Hz, 1H), 3.02-2.93 (m, 1H), 2.87 (dd,  $J = 15.2, 5.2$  Hz, 1H);  $^{13}\text{C}$ -NMR ( $\text{CDCl}_3$ , 100 MHz) : 168.36, 143.07, 136.72, 132.68, 132.04, 130.18, 129.04, 126.92, 124.61, 122.75, 122.33, 120.20, 118.82, 111.24, 109.59, 57.22, 38.36, 21.83.

### 10-Methoxy-7,8,13,13b-tetrahydro-5H-benzo[1,2]indolizino[8,7-b]indol-5-one (2f)

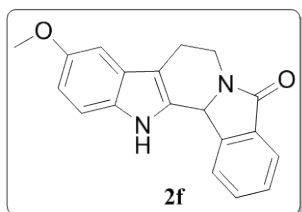

A 50 mL two neck round bottom flask fitted with condenser and rubber septum was charged with 2-(2-(5-methoxy-1H-indol-3-yl)ethyl)isoindoline-1,3-dione (100 mg, 0.312 mmol), 4 Å molecular sieves (50 mg), magnetic stir bar and anhydrous dichloromethane (20 mL) under nitrogen atmosphere. After 15 min to this mixture was added trifluoromethanesulfonic acid (276  $\mu\text{L}$ , 3.121 mmol) with stirring at room temperature. After 12 h the reaction mixture was neutralized with solid  $\text{NaHCO}_3$  (288 mg, 3.433 mmol). After 15 min., to this crude reaction mixture was added  $\text{NaBH}_4$  (53 mg, 1.404 mmol) and  $\text{CF}_3\text{COOH}$  (323  $\mu\text{L}$ , 4.213 mmol) under nitrogen atmosphere with vigorous stirring at room temperature. After 12 h the reaction mixture was quenched with aqueous  $\text{NaHCO}_3$ . Organic layer was separated and aqueous layer was extracted with ethyl acetate (3 x 50 mL). The combined organic layer was washed with aqueous  $\text{NaHCO}_3$ , dried over anhydrous  $\text{Na}_2\text{SO}_4$  and filtered. The solvent was removed under reduced pressure. The crude mixture was purified through neutral alumina column chromatography using ethyl acetate : hexane (4:1) mixture as eluent to give 10-methoxy-7,8,13,13b-tetrahydro-5H-benzo[1,2]indolizino[8,7-b]indol-5-one in 74% yield (70 mg) as pale yellow solid. (m.p. : 230-231  $^\circ\text{C}$ ); IR (KBr,  $\text{cm}^{-1}$ ) : 3246, 3057, 2838, 1674, 1473, 1405, 1206, 861;  $^1\text{H}$ -NMR ( $\text{DMSO}-d_6$ , 400 MHz) :  $\delta$  11.18 (br s, 1H), 8.27 (dd,  $J = 7.6, 0.6$  Hz, 1H), 7.73 (d,  $J = 7.6$  Hz, 1H), 7.70 (dd,  $J = 7.6, 1.1$  Hz, 1H), 7.55 (t,  $J = 7.6$  Hz, 1H), 7.27 (d,  $J = 8.7$  Hz, 1H), 6.91 (d,  $J = 2.4$  Hz, 1H), 6.73 (dd,  $J = 8.7, 2.4$  Hz, 1H), 6.03 (s, 1H), 4.58 (dd,  $J = 13.2, 5.6$  Hz, 1H), 3.73 (s, 3H), 3.37 (dd,  $J = 11.6, 4.8$  Hz, 1H), 2.80 (dd,  $J = 15.2, 4.8$  Hz, 1H), 2.71-2.64 (m, 1H);  $^{13}\text{C}$ -NMR ( $\text{DMSO}-d_6$ , 100 MHz) : 167.05, 153.27, 143.62, 131.81, 131.63, 131.43, 131.40, 128.55, 126.46, 123.71, 123.06, 111.88, 111.36, 106.94, 100.11, 56.61, 55.28, 37.67, 21.42; HRMS (ESI) (m/z) :  $[\text{M}+\text{H}]^+$  Found 305.1302; Calculated 305.1290; for  $\text{C}_{19}\text{H}_{17}\text{N}_2\text{O}_2$ .

## 12-Methyl-7,8,13,13b-tetrahydro-5H-benzo[1,2]indolizino[8,7-b]indol-5-one (2g)

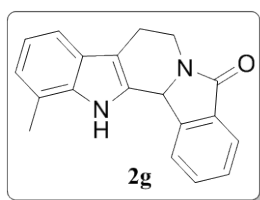

A 50 mL two neck round bottom flask fitted with condenser and rubber septum was charged with 2-(2-(7-methyl-1*H*-indol-3-yl)ethyl)isoindoline-1,3-dione (120 mg, 0.394 mmol), 4Å molecular sieves (50 mg), magnetic stir bar and anhydrous dichloromethane (20 mL) under nitrogen atmosphere. To this mixture was added trifluoromethanesulfonic acid (349 µL, 3.943 mmol) with stirring at room temperature. After 12 h the reaction mixture was neutralized with solid NaHCO<sub>3</sub> (364 mg, 4.337 mmol). After 15 min., to this crude reaction mixture was added NaBH<sub>4</sub> (67 mg, 1.774 mmol) and CF<sub>3</sub>COOH (408 µL, 5.323 mmol) under nitrogen atmosphere with vigorous stirring at room temperature. After 12 h the reaction mixture was quenched with aqueous NaHCO<sub>3</sub>. Organic layer was separated and aqueous layer was extracted with ethyl acetate (3 x 50 mL). The combined organic layer was washed with aqueous NaHCO<sub>3</sub>, dried over anhydrous Na<sub>2</sub>SO<sub>4</sub> and filtered. The solvent was removed under reduced pressure. The crude mixture was purified through neutral alumina column chromatography using ethyl acetate : hexane (4:1) mixture as eluent to give 12-methyl-7,8,13,13b-tetrahydro-5*H*-benzo[1,2]indolizino[8,7-*b*]indol-5-one in 66% yield (75 mg) as pale yellow solid. (m.p. : 204-205 °C); IR (KBr, cm<sup>-1</sup>) : 3266, 3046, 2848, 2788, 1666, 1464, 1407; <sup>1</sup>H-NMR (CDCl<sub>3</sub>, 400 MHz) : δ 8.09 (br s, 1H), 7.91 (d, *J* = 7.6 Hz, 1H), 7.83 (d, *J* = 7.2 Hz, 1H), 7.64 (t, *J* = 6.8 Hz, 1H), 7.52 (t, *J* = 7.6 Hz, 1H), 7.33 (d, *J* = 7.6 Hz, 1H), 7.04 (t, *J* = 7.6 Hz, 1H), 7.00 (d, *J* = 6.8 Hz, 1H), 5.85 (s, 1H), 4.86 (dd, *J* = 13.2, 5.6 Hz, 1H), 3.42-3.36 (m, 1H), 3.02-2.93 (m, 1H), 2.86 (dd, *J* = 15.4, 4.8 Hz, 1H), 2.52 (s, 3H); <sup>13</sup>C-NMR (CDCl<sub>3</sub>, 100 MHz) : 168.26, 143.09, 136.23, 132.76, 132.03, 129.93, 129.03, 126.56, 124.70, 123.50, 122.20, 120.53, 120.33, 116.58, 110.39, 57.20, 38.35, 21.93, 16.84; HRMS (ESI) (m/z) : [M+H]<sup>+</sup> Found 289.1355; Calculated 289.1341; for C<sub>19</sub>H<sub>17</sub>N<sub>2</sub>O.

## 10,12-Dimethyl-7,8,13,13b-tetrahydro-5H-benzo[1,2]indolizino[8,7-b]indol-5-one (2h)

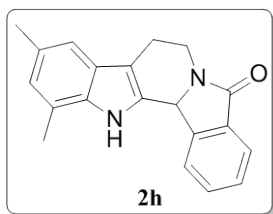

A 50 mL two neck round bottom flask fitted with condenser and rubber septum was charged with 2-(2-(5,7-dimethyl-1*H*-indol-3-

yl)ethyl)isoindoline-1,3-dione (120 mg, 0.377 mmol), 4Å molecular sieves (50 mg), magnetic stir bar and anhydrous dichloromethane (20 mL) under nitrogen atmosphere. To this mixture was added trifluoromethanesulfonic acid (334 µL, 3.769 mmol) with stirring at room temperature. After 12 h the reaction mixture was neutralized with solid NaHCO<sub>3</sub> (348 mg, 4.146 mmol). After 15 min., to this crude reaction mixture was added NaBH<sub>4</sub> (64 mg, 1.696 mmol) and CF<sub>3</sub>COOH (390 µL, 5.088 mmol) under nitrogen atmosphere with vigorous stirring at room temperature. After 12 h the reaction mixture was quenched with aqueous NaHCO<sub>3</sub>. Organic layer was separated and aqueous layer was extracted with ethyl acetate (3 x 50 mL). The combined organic layer was washed with aqueous NaHCO<sub>3</sub>, dried over anhydrous Na<sub>2</sub>SO<sub>4</sub> and filtered. The solvent was removed under reduced pressure. The crude mixture was purified through neutral alumina column chromatography using ethyl acetate : hexane (4:1) mixture as eluent to give 10,12-dimethyl-7,8,13,13b-tetrahydro-5H-benzo[1,2]indolizino[8,7-b]indol-5-one in 60% yield (68 mg) as pale yellow solid. (m.p. : 200-201 °C); IR (KBr, cm<sup>-1</sup>) : 3271, 2851, 1666, 1409; <sup>1</sup>H-NMR (CDCl<sub>3</sub>, 400 MHz) : δ 8.03 (br s, 1H), 7.90 (d, *J* = 7.6 Hz, 1H), 7.83 (d, *J* = 7.6 Hz, 1H), 7.63 (t, *J* = 7.4 Hz, 1H), 7.50 (t, *J* = 7.4 Hz, 1H), 7.12 (s, 1H), 6.84 (s, 1H), 5.83 (s, 1H), 4.85 (dd, *J* = 13.2, 6.0 Hz, 1H), 3.42-3.34 (m, 1H), 2.98-2.90 (m, 1H), 2.83 (dd, *J* = 15.4, 4.8 Hz, 1H), 2.48 (s, 3H), 2.39 (s, 3H); <sup>13</sup>C-NMR (CDCl<sub>3</sub>, 100 MHz) : 168.29, 143.20, 134.59, 132.74, 132.00, 130.02, 129.81, 128.96, 126.84, 125.16, 124.61, 122.30, 119.99, 116.20, 109.87, 57.30, 38.39, 21.94, 21.49, 16.78; HRMS (ESI) (*m/z*) : [M+H]<sup>+</sup> Found 303.1498; Calculated 303.1497; for C<sub>20</sub>H<sub>19</sub>N<sub>2</sub>O.

### 10-Fluoro-7,8,13,13b-tetrahydro-5H-benzo[1,2]indolizino[8,7-b]indol-5-one (2b)

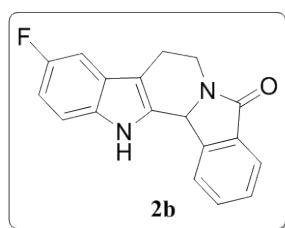

A 50 mL two neck round bottom flask fitted with condenser and rubber septum was charged with 2-(2-(5-fluoro-1H-indol-3-yl)ethyl)isoindoline-1,3-dione (125 mg, 0.405 mmol), 4Å molecular sieves (50 mg), magnetic stir bar and anhydrous dichloromethane (20 mL) under nitrogen atmosphere. To this mixture was added trifluoromethanesulfonic acid (359 µL, 4.054 mmol) with stirring at room temperature. After 12 h the reaction mixture was neutralized with solid NaHCO<sub>3</sub> (375 mg, 4.460 mmol). After 15 min., to this crude reaction mixture was added NaBH<sub>4</sub> (69 mg, 1.824 mmol) and CF<sub>3</sub>COOH (419 µL, 5.473 mmol) under nitrogen atmosphere with vigorous stirring at room temperature. After 12 h the reaction mixture was quenched with aqueous NaHCO<sub>3</sub>. Organic

layer was separated and aqueous layer was extracted with ethyl acetate (3 x 50 mL). The combined organic layer was washed with aqueous NaHCO<sub>3</sub>, dried over anhydrous Na<sub>2</sub>SO<sub>4</sub> and filtered. The solvent was removed under reduced pressure. The crude mixture was purified through neutral alumina column chromatography using ethyl acetate : hexane (4:1) mixture as eluent to give 10-fluoro-7,8,13,13b-tetrahydro-5*H*-benzo[1,2]indolizino[8,7-*b*]indol-5-one in 79% yield (94 mg) as pale yellow solid. (m.p. : 251-252 °C); IR (KBr, cm<sup>-1</sup>) : 3216, 2949, 1671, 1471, 1419, 727; <sup>1</sup>H-NMR (DMSO-*d*<sub>6</sub>, 400MHz) : δ 11.46 (br s, 1H), 8.27 (d, *J* = 8.0 Hz, 1H), 7.72 (dd, *J* = 14.0, 8.0 Hz, 2H), 7.55 (t, *J* = 8.0 Hz, 1H), 7.38 (dd, *J* = 10.0, 5.0 Hz, 1H), 7.18 (dd, *J* = 11.2, 4.0 Hz, 1H), 6.93 (td, *J* = 10.0, 3.0 Hz, 1H), 6.06 (s, 1H), 4.58 (dd, *J* = 13.2, 5.0 Hz, 1H), 3.40-3.36 (m, 1H) [to assign this proton the compound was recorded in acetone-*d*<sub>6</sub>, the value obtained was 3.27 (ddd, *J* = 13.2, 10.8, 5.6 Hz, 1H)], 2.81 (dd, *J* = 16.0, 4.0 Hz, 1H), 2.71-2.62 (m, 1H); <sup>13</sup>C-NMR (DMSO-*d*<sub>6</sub>, 100MHz) : 167.03, 156.80 (d, *J* = 230.4 Hz, 1C), 143.37, 132.98 (d, *J* = 4.3 Hz, 1C), 131.86, 131.63, 128.63, 126.38 (d, *J* = 10.0 Hz, 1C), 123.60, 123.09, 112.16 (d, *J* = 9.7 Hz, 1C), 109.55, 109.29, 107.47 (d, *J* = 4.6 Hz, 1C), 103.03 (d, *J* = 23.2 Hz, 1C), 56.52, 37.54, 21.29; HRMS (ESI) (m/z) : [M+H]<sup>+</sup> Found 293.1099; Calculated 293.1090; for C<sub>18</sub>H<sub>14</sub>N<sub>2</sub>OF.

### 10-Chloro-7,8,13,13b-tetrahydro-5*H*-benzo[1,2]indolizino[8,7-*b*]indol-5-one (2c)

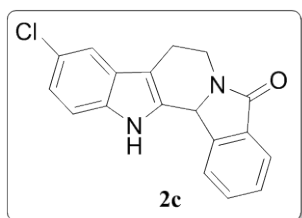

A 50 mL two neck round bottom flask fitted with condenser and rubber septum was charged with 2-(2-(5-chloro-1*H*-indol-3-yl)ethyl)isoindoline-1,3-dione (120 mg, 0.370 mmol), 4Å molecular sieves (50 mg), magnetic stir bar and anhydrous dichloromethane (20 mL) under nitrogen atmosphere. To this mixture was added trifluoromethanesulfonic acid (330 μL, 3.695 mmol) with stirring at room temperature. After 12 h the reaction mixture was neutralized with solid NaHCO<sub>3</sub> (341 mg, 4.065 mmol). After 15 min., to this crude reaction mixture was added NaBH<sub>4</sub> (63 mg, 1.663 mmol) and CF<sub>3</sub>COOH (382 μL, 4.988 mmol) under nitrogen atmosphere with vigorous stirring at room temperature. After 12 h the reaction mixture was quenched with aqueous NaHCO<sub>3</sub>. Organic layer was separated and aqueous layer was extracted with ethyl acetate (3 x 50 mL). The combined organic layer was washed with aqueous NaHCO<sub>3</sub>, dried over anhydrous Na<sub>2</sub>SO<sub>4</sub> and filtered. The solvent was removed under reduced pressure. The crude mixture was purified through neutral alumina column chromatography using ethyl

acetate : hexane (4:1) mixture as eluent to give 10-chloro-7,8,13,13b-tetrahydro-5H-benzo[1,2]indolizino[8,7-b]indol-5-one in 78% yield (89 mg) as pale yellow solid. (m.p. : 242-243 °C), IR (KBr, cm<sup>-1</sup>) : 3220, 2939, 1671, 1468, 1413, 725; <sup>1</sup>H-NMR (DMSO-*d*<sub>6</sub>, 400MHz) : δ 11.57 (br s, 1H), 8.27 (d, *J* = 7.6 Hz, 1H), 7.72 (dd, *J* = 14.4, 7.6 Hz, 2H), 7.55 (t, *J* = 7.6 Hz, 1H), 7.47 (d, *J* = 1.6 Hz, 1H), 7.40 (d, *J* = 8.8 Hz, 1H), 7.08 (dd, *J* = 8.8, 1.6 Hz, 1H), 6.07 (s, 1H), 4.58 (dd, *J* = 13.0, 5.6 Hz, 1H), 3.45-3.39 (m, 1H), [to assign this proton the compound was recorded in acetone-*d*<sub>6</sub>, the value obtained was 3.45 (ddd, *J* = 13.2, 11.2, 5.2 Hz, 1H)], 2.82 (dd, *J* = 15.2, 4.0 Hz, 1H), 2.71-2.63 (m, 1H); <sup>13</sup>C-NMR (DMSO-*d*<sub>6</sub>, 100 MHz) : 167.12, 146.36, 134.92, 132.78, 131.97, 131.69, 128.75, 127.34, 123.77, 123.53, 123.21, 121.44, 117.58, 112.82, 107.24, 56.54, 37.58, 21.27; HRMS (ESI) : [M+H]<sup>+</sup> Found 309.0780; Calculated 309.0795; for C<sub>18</sub>H<sub>14</sub>N<sub>2</sub>OCl.

### 10-Bromo-7,8,13,13b-tetrahydro-5H-benzo[1,2]indolizino[8,7-b]indol-5-one (2d)

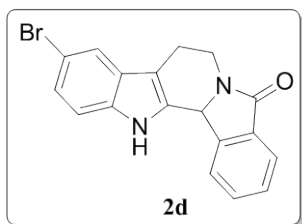

A 50 mL two neck round bottom flask fitted with condenser and rubber septum was charged with 2-(2-(5-bromo-1H-indol-3-yl)ethyl)isoindoline-1,3-dione (120 mg, 0.389 mmol), 4Å molecular sieves (50 mg), magnetic stir bar and anhydrous dichloromethane (20 mL) under nitrogen atmosphere. To this mixture was added trifluoromethanesulfonic acid (344 μL, 3.892 mmol) with stirring at room temperature. After 12 h the reaction mixture was neutralized with solid NaHCO<sub>3</sub> (360 mg, 4.281 mmol). After 15 min., to this crude reaction mixture was added NaBH<sub>4</sub> (66 mg, 1.751 mmol) and CF<sub>3</sub>COOH (402 μL, 5.254 mmol) under nitrogen atmosphere with vigorous stirring at room temperature. After 12 h the reaction mixture was quenched with aqueous NaHCO<sub>3</sub>. Organic layer was separated and aqueous layer was extracted with ethyl acetate (3 x 50 mL). The combined organic layer was washed with aqueous NaHCO<sub>3</sub>, dried over anhydrous Na<sub>2</sub>SO<sub>4</sub> and filtered. The solvent was removed under reduced pressure. The crude mixture was purified through neutral alumina column chromatography using ethyl acetate : hexane (4:1) mixture as eluent to give 10-bromo-7,8,13,13b-tetrahydro-5H-benzo[1,2]indolizino[8,7-b]indol-5-one in 73% yield (100 mg) as pale brown solid. (m.p. : 238-239 °C); IR (KBr, cm<sup>-1</sup>) : 3235, 2844, 1672, 1466, 1414, 726; <sup>1</sup>H-NMR (DMSO-*d*<sub>6</sub>, 400 MHz) : δ 11.59 (br s, 1H), 8.27 (d, *J* = 7.6 Hz, 1H), 7.72 (dd, *J* = 14.5, 7.6 Hz, 2H), 7.61 (d, *J* = 1.7 Hz, 1H), 7.55 (t, *J* = 7.6 Hz, 1H), 7.36 (d, *J* = 8.6 Hz, 1H), 7.20 (dd, *J* = 8.6, 1.7 Hz,

1H), 6.07 (s, 1H), 4.57 (dd,  $J = 13.1, 6.0$  Hz, 1H), 3.40-3.38 (m, 1H), [to assign this proton the compound was recorded again in acetone- $d_6$ , the value obtained was 3.36 (ddd,  $J = 12.8, 11.2, 4.8$  Hz)], 2.83 (dd,  $J = 15.5, 4.0$  Hz, 1H), 2.70-2.64 (m, 1H);  $^{13}\text{C}$ -NMR (DMSO- $d_6$ , 100 MHz) : 167.11, 143.34, 135.16, 132.60, 131.97, 131.68, 128.75, 128.02, 123.97, 123.76, 123.20, 120.59, 113.29, 111.43, 107.14, 56.50, 37.57, 21.25; HRMS (ESI) (m/z) :  $[\text{M}+\text{H}]^+$  Found 353.0307; Calculated 353.0289; for  $\text{C}_{18}\text{H}_{14}\text{N}_2\text{OBr}$ .

## 12-Fluoro-7,8,13,13b-tetrahydro-5H-benzo[1,2]indolizino[8,7-b]indol-5-one (2e)

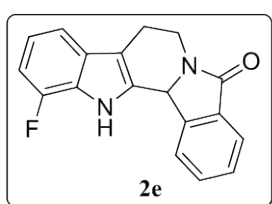

A 50 mL two neck round bottom flask fitted with condenser and rubber septum was charged with 2-(2-(7-fluoro-1H-indol-3-yl)ethyl)isoindoline-1,3-dione (125 mg, 0.405 mmol), 4Å molecular sieves (50 mg), magnetic stir bar and anhydrous dichloromethane (20 mL) under nitrogen atmosphere. To this mixture was added trifluoromethanesulfonic acid (359  $\mu\text{L}$ , 4.054 mmol) with stirring at room temperature. After 12 h the reaction mixture was neutralized with solid  $\text{NaHCO}_3$  (375 mg, 4.460 mmol). After 15 min., to this crude reaction mixture was added  $\text{NaBH}_4$  (69 mg, 1.824 mmol) and  $\text{CF}_3\text{COOH}$  (419  $\mu\text{L}$ , 5.473 mmol) under nitrogen atmosphere with vigorous stirring at room temperature. After 12 h the reaction mixture was quenched with aqueous  $\text{NaHCO}_3$ . Organic layer was separated and aqueous layer was extracted with ethyl acetate (3 x 50 mL). The combined organic layer was washed with aqueous  $\text{NaHCO}_3$ , dried over anhydrous  $\text{Na}_2\text{SO}_4$  and filtered. The solvent was removed under reduced pressure. The crude mixture was purified through neutral alumina column chromatography using ethyl acetate : hexane (4:1) mixture as eluent to give 12-fluoro-7,8,13,13b-tetrahydro-5H-benzo[1,2]indolizino[8,7-b]indol-5-one in 71% yield (84 mg) as pale yellow solid. (m.p. : 230-231 °C); IR (KBr,  $\text{cm}^{-1}$ ) : 3185, 3046, 1674, 1471, 1237, 719;  $^1\text{H}$ -NMR (DMSO- $d_6$ , 400 MHz) :  $\delta$  11.81 (br s, 1H), 8.45 (dd,  $J = 7.6, 0.6$  Hz, 1H), 7.74 (d,  $J = 7.6$  Hz, 1H), 7.71 (dd,  $J = 7.6, 1.2$  Hz, 1H), 7.55 (t,  $J = 7.6$  Hz, 1H), 7.25 (dd,  $J = 6.4, 2.0$  Hz, 1H), 6.99-6.91 (m, 2H), 6.06 (s, 1H), 4.59 (dd,  $J = 13.2, 5.6$  Hz, 1H), 3.40-3.37 (m, 1H), [to assign this proton the compound was recorded again in acetone- $d_6$ , the value obtained was 3.54 (ddd,  $J = 13.2, 11.2, 5.2$  Hz, 1H)], 2.84 (dd,  $J = 15.6, 4.4$  Hz, 1H), 2.74-2.65 (m, 1H);  $^{13}\text{C}$ -NMR (DMSO- $d_6$ , 100 MHz) : 167.31, 149.04 (d,  $J = 241.3$  Hz, 1C), 143.50, 132.33, 132.04, 131.62, 130.16 (d,  $J = 5.9$  Hz, 1C), 128.73, 124.11, 123.96, 123.11, 119.39 (d,  $J = 6.1$  Hz, 1C), 114.47 (d,  $J = 3.0$  Hz, 1C), 108.60 (d,  $J = 2.0$  Hz, 1C), 106.63 (d,  $J = 16.2$  Hz, 1C),

56.66, 37.68, 21.60; HRMS (ESI) (m/z) : [M+H]<sup>+</sup> Found 293.1087; Calculated 293.1090; for C<sub>18</sub>H<sub>14</sub>N<sub>2</sub>OF.

### (F) General procedure for the synthesis of indoloindolizinones and indoloquinolizinones

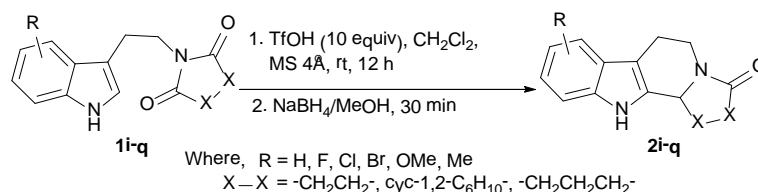

### 5,6,11,11b-Tetrahydro-1*H*-indolizino[8,7-*b*]indol-3(2*H*)-one (2i)<sup>7</sup>

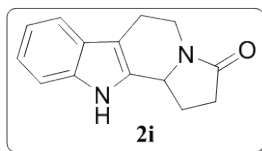

A 50 mL two neck round bottom flask was charged with 1-(2-(1*H*-indol-3-yl)ethyl)pyrrolidine-2,5-dione (150 mg, 0.619 mmol), 4Å molecular sieves (50 mg), anhydrous CH<sub>2</sub>Cl<sub>2</sub> (20 mL), and a stir bar. The flask was capped with a rubber septum and maintained in nitrogen atmosphere. Trifluoromethanesulfonic acid (548 μL, 6.191 mmol) was added and stirred at room temperature for 12 h. To this reaction mixture was added NaBH<sub>4</sub> (105 mg, 2.786 mmol), methanol (3 mL) and stirred for 0.5 h under nitrogen atmosphere. Then the reaction mixture was quenched with aqueous NaHCO<sub>3</sub>. Organic layer was separated and aqueous layer was extracted with ethyl acetate (3 x 50 mL). The combined organic layer was washed with aqueous NaHCO<sub>3</sub>, dried over anhydrous Na<sub>2</sub>SO<sub>4</sub> and filtered. The solvent was removed under reduced pressure. The crude mixture was purified through neutral alumina column chromatography using ethyl acetate : hexane (4:1) as eluent to give 5,6,11,11b-tetrahydro-1*H*-indolizino[8,7-*b*]indol-3(2*H*)-one in 82% yield (113 mg) as off white solid. (m.p. : 251-252 °C, lit<sup>7</sup> 250 °C); IR (KBr, cm<sup>-1</sup>) : 3444, 3076, 2853, 1659, 1450, 1304; <sup>1</sup>H-NMR (CDCl<sub>3</sub>, 400 MHz) : δ 8.13 (br s, 1H), 7.49 (d, *J* = 7.6 Hz, 1H), 7.34 (d, *J* = 8.0 Hz, 1H), 7.19 (t, *J* = 7.6 Hz, 1H), 7.13 (t, *J* = 7.2 Hz, 1H), 4.96-4.92 (m, 1H), 4.57-4.52 (m, 1H), 3.08-3.01 (m, 1H), 2.92-2.80 (m, 2H), 2.65-2.48 (m, 3H), 1.99-1.93 (m, 1H); <sup>13</sup>C-NMR (CDCl<sub>3</sub>, 100 MHz) : 173.33, 136.39, 133.28, 126.92, 122.37, 120.01, 118.57, 111.09, 108.45, 54.38, 37.72, 31.75, 25.81, 21.14.

### 8-Methoxy-5,6,11,11b-tetrahydro-1*H*-indolizino[8,7-*b*]indol-3(2*H*)-one (2n)<sup>4</sup>

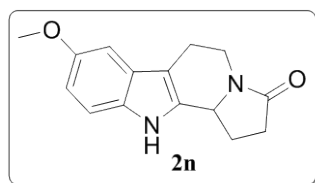

A 50 mL two neck round bottom flask was charged with 1-(2-(5-methoxy-1*H*-indol-3-yl)ethyl)pyrrolidine-2,5-dione (100 mg, 0.367 mmol), 4Å molecular sieves (50 mg), anhydrous CH<sub>2</sub>Cl<sub>2</sub> (20 mL), and a stir bar. The flask was capped with a rubber septum and maintained in nitrogen atmosphere. Trifluoromethanesulfonic acid (325 µL, 3.672 mmol) was added and stirred at room temperature for 12 h. To this reaction mixture was added NaBH<sub>4</sub> (63 mg, 1.653 mmol), methanol (3 mL) and stirred for 0.5 h under nitrogen atmosphere. Then the reaction mixture was quenched with aqueous NaHCO<sub>3</sub>. Organic layer was separated and aqueous layer was extracted with ethyl acetate (3 x 50 mL). The combined organic layer was washed with aqueous NaHCO<sub>3</sub>, dried over anhydrous Na<sub>2</sub>SO<sub>4</sub> and filtered. The solvent was removed under reduced pressure. The crude mixture was purified through neutral alumina column chromatography using ethyl acetate : hexane (4:1) as eluent to give 8-methoxy-5,6,11,11b-tetrahydro-1*H*-indolizino[8,7-*b*]indol-3(2*H*)-one in 80% yield (75 mg) as off white solid. (m.p. : 220-221 °C); IR (KBr, cm<sup>-1</sup>) : 3255, 2983, 2909, 2838, 1669, 1441, 1303, 1134; <sup>1</sup>H-NMR (CDCl<sub>3</sub>, 400 MHz) : δ 7.91 (br s, 1H), 7.22 (d, *J* = 8.8 Hz, 1H), 6.94 (d, *J* = 2.4 Hz, 1H), 6.84 (dd, *J* = 8.8, 2.4 Hz, 1H), 4.92 (t, *J* = 7.2 Hz, 1H), 4.56-4.51 (m, 1H), 3.85 (s, 3H), 3.07-3.00 (m, 1H), 2.89-2.75 (m, 2H), 2.67-2.48 (m, 3H), 2.02-1.89 (m, 1H); <sup>13</sup>C-NMR (CDCl<sub>3</sub>, 100 MHz) : 173.37, 154.48, 134.17, 131.42, 127.40, 112.30, 111.84, 108.33, 100.72, 56.07, 54.47, 37.75, 31.77, 25.83, 21.23.

#### 10-Methyl-5,6,11,11b-tetrahydro-1*H*-indolizino[8,7-*b*]indol-3(2*H*)-one (2o)<sup>4</sup>

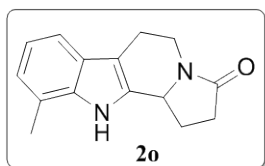

A 50 mL two neck round bottom flask was charged with 1-(2-(7-methyl-1*H*-indol-3-yl)ethyl)pyrrolidine-2,5-dione (125 mg, 0.488 mmol), 4Å molecular sieves (50 mg), anhydrous CH<sub>2</sub>Cl<sub>2</sub> (20 mL), and a stir bar. The flask was capped with a rubber septum and maintained in nitrogen atmosphere. Trifluoromethanesulfonic acid (432 µL, 4.877 mmol) was added and stirred at room temperature for 12 h. To this reaction mixture was added NaBH<sub>4</sub> (83 mg, 2.195 mmol), methanol (3 mL) and stirred for 0.5 h under nitrogen atmosphere. Then the reaction mixture was quenched with aqueous NaHCO<sub>3</sub>. Organic layer was separated and aqueous layer was extracted with ethyl acetate (3 x 50 mL). The combined organic layer was washed with aqueous NaHCO<sub>3</sub>, dried over anhydrous Na<sub>2</sub>SO<sub>4</sub> and filtered. The solvent was removed under reduced pressure. The crude mixture was purified through neutral alumina column chromatography using ethyl acetate : hexane (4:1) as eluent to give 10-methyl-5,6,11,11b-tetrahydro-1*H*-indolizino[8,7-*b*]indol-3(2*H*)-one in 70% yield (82 mg) as



colorless solid. (m.p. : 278-279 °C); IR (KBr, cm<sup>-1</sup>) : 3248, 2971, 2920, 2837, 1665, 1440, 1305; <sup>1</sup>H-NMR (CDCl<sub>3</sub>, 400 MHz) : δ 7.92 (br s, 1H), 7.35 (d, *J* = 8.0 Hz, 1H), 7.06 (t, *J* = 8.0 Hz, 1H), 7.00 (d, *J* = 7.2 Hz, 1H), 4.98-4.94 (m, 1H), 4.53 (ddd, *J* = 13.2, 5.2, 2.0 Hz, 1H), 3.07-3.00 (m, 1H), 2.88 (ddd, *J* = 15.2, 5.2, 2.0 Hz, 1H), 2.85-2.79 (m, 1H), 2.68-2.51 (m, 3H), 2.49 (s, 3H), 2.03-1.93 (m, 1H); <sup>13</sup>C-NMR (CDCl<sub>3</sub>, 100 MHz) : 172.43, 135.61, 134.46, 126.09, 121.68, 120.29, 118.84, 115.49, 106.39, 53.81, 36.95, 31.13, 25.74, 20.91, 16.92.

### 8,10-Dimethyl-5,6,11,11b-tetrahydro-1*H*-indolizino[8,7-*b*]indol-3(2*H*)-one (2p)

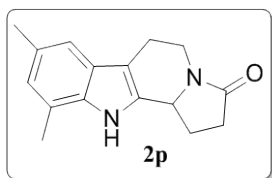

A 50 mL two neck round bottom flask was charged with 1-(2-(5,7-dimethyl-1*H*-indol-3-yl)ethyl)pyrrolidine-2,5-dione (100 mg, 0.370 mmol), 4Å molecular sieves (50 mg), anhydrous CH<sub>2</sub>Cl<sub>2</sub> (20 mL), and a stir bar. The flask was capped with a rubber septum and maintained in nitrogen atmosphere. Trifluoromethanesulfonic acid (327 μL, 3.699 mmol) was added and stirred at room temperature for 12 h. To this reaction mixture was added NaBH<sub>4</sub> (63 mg, 1.665 mmol), methanol (3 mL) and stirred for 0.5 h under nitrogen atmosphere. Then the reaction mixture was quenched with aqueous NaHCO<sub>3</sub>. Organic layer was separated and aqueous layer was extracted with ethyl acetate (3 x 50 mL). The combined organic layer was washed with aqueous NaHCO<sub>3</sub>, dried over anhydrous Na<sub>2</sub>SO<sub>4</sub> and filtered. The solvent was removed under reduced pressure. The crude mixture was purified through neutral alumina column chromatography using ethyl acetate : hexane (4:1) as eluent to give 8,10-dimethyl-5,6,11,11b-tetrahydro-1*H*-indolizino[8,7-*b*]indol-3(2*H*)-one in 65% yield (61 mg) as pale blue solid. (m.p. : 252-253 °C); IR (KBr, cm<sup>-1</sup>) : 3264, 2907, 2719, 1665, 1431, 1368; <sup>1</sup>H-NMR (CDCl<sub>3</sub>, 400 MHz) : δ 7.83 (br s, 1H), 7.13 (s, 1H), 6.84 (s, 1H), 4.96-4.92 (m, 1H), 4.52 (ddd, *J* = 12.8, 5.5, 1.6 Hz, 1H), 3.06-2.98 (m, 1H), 2.84 (ddd, *J* = 15.6, 5.5, 1.6 Hz, 1H), 2.80-2.79 (m, 1H), 2.65-2.57 (m, 2H), 2.54-2.50 (m, 1H), 2.45 (s, 3H), 2.42 (s, 3H), 1.98-1.91 (m, 1H); <sup>13</sup>C-NMR (CDCl<sub>3</sub>, 100 MHz) : 173.24, 134.09, 133.02, 129.48, 126.65, 124.61, 119.81, 115.83, 108.43, 54.39, 37.66, 31.69, 25.86, 21.36, 21.15, 16.65; HRMS (ESI) : [M+H]<sup>+</sup> Found 255.1509; Calculated 255.1497; for C<sub>16</sub>H<sub>19</sub>N<sub>2</sub>O.

### 8-Fluoro-5,6,11,11b-tetrahydro-1*H*-indolizino[8,7-*b*]indol-3(2*H*)-one (2j)<sup>4</sup>

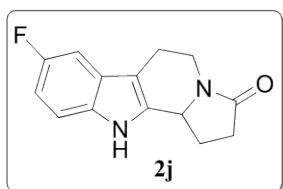

A 50 mL two neck round bottom flask was charged with 1-(2-(5-fluoro-1*H*-indol-3-yl)ethyl)pyrrolidine-2,5-dione (100 mg, 0.384 mmol), 4Å molecular sieves (50 mg), anhydrous CH<sub>2</sub>Cl<sub>2</sub> (20 mL), and a stir bar. The flask was capped with a rubber septum and maintained in nitrogen atmosphere. Trifluoromethanesulfonic acid (340 μL, 3.842 mmol) was added and stirred at room temperature for 12 h. To this reaction mixture was added NaBH<sub>4</sub> (65 mg, 1.729 mmol), methanol (3 mL) and stirred for 0.5 h under nitrogen atmosphere. Then the reaction mixture was quenched with aqueous NaHCO<sub>3</sub>. Organic layer was separated and aqueous layer was extracted with ethyl acetate (3 x 50 mL). The combined organic layer was washed with aqueous NaHCO<sub>3</sub>, dried over anhydrous Na<sub>2</sub>SO<sub>4</sub> and filtered. The solvent was removed under reduced pressure. The crude mixture was purified through neutral alumina column chromatography using ethyl acetate : hexane (4:1) as eluent to give 8-fluoro-5,6,11,11*b*-tetrahydro-1*H*-indolizino[8,7-*b*]indol-3(2*H*)-one in 65% yield (61 mg) as off white solid. (m.p. : 276-277 °C); IR (KBr, cm<sup>-1</sup>) : 3244, 2978, 2924, 2865, 1658, 1439, 1306, 799; <sup>1</sup>H-NMR (acetone-*d*<sub>6</sub>, 400 MHz) : δ 10.3 (br s, 1H), 7.38 (dd, *J* = 9.0, 4.4 Hz, 1H), 7.20 (dd, *J* = 9.6, 2.4 Hz, 1H), 6.91 (td, *J* = 9.0, 2.4 Hz, 1H), 5.02-4.98 (m, 1H), 4.44 (ddd, *J* = 12.8, 5.6, 1.2 Hz, 1H), 3.08-3.00 (m, 1H), 2.81-2.70 (m, 2H), 2.69-2.64 (m, 1H), 2.58-2.49 (m, 1H), 2.35 (ddd, *J* = 16.4, 9.6, 2.4 Hz, 1H), 2.01-1.93 (m, 1H); <sup>13</sup>C-NMR (DMSO-*d*<sub>6</sub>, 100 MHz) : 172.33, 156.82 (d, *J* = 230.0 Hz, 1C), 136.82, 132.74, 126.69 (d, *J* = 9.8 Hz, 1C), 112.00 (d, *J* = 9.7 Hz, 1C), 108.82 (d, *J* = 25.7 Hz, 1C), 106.36 (d, *J* = 4.4 Hz, 1C), 102.79 (d, *J* = 23.1 Hz, 1C), 53.60, 36.80, 31.00, 25.30, 20.69.

### 8-Chloro-5,6,11,11*b*-tetrahydro-1*H*-indolizino[8,7-*b*]indol-3(2*H*)-one (2k)

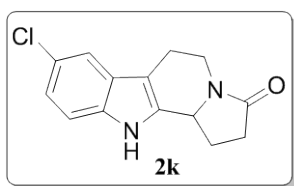

A 50 mL two neck round bottom flask was charged with 1-(2-(5-chloro-1*H*-indol-3-yl)ethyl)pyrrolidine-2,5-dione (140 mg, 0.506 mmol), 4Å molecular sieves (50 mg), anhydrous CH<sub>2</sub>Cl<sub>2</sub> (20 mL), and a stir bar. The flask was capped with a rubber septum and maintained in nitrogen atmosphere. Trifluoromethanesulfonic acid (448 μL, 5.059 mmol) was added and stirred at room temperature for 12 h. To this reaction mixture was added NaBH<sub>4</sub> (86 mg, 2.277 mmol), methanol (3 mL) and stirred for 0.5 h under nitrogen atmosphere. Then the reaction mixture was quenched with aqueous NaHCO<sub>3</sub>. Organic layer was separated and aqueous layer was extracted with ethyl acetate (3 x 50 mL). The combined organic layer was washed with aqueous NaHCO<sub>3</sub>, dried over anhydrous Na<sub>2</sub>SO<sub>4</sub> and filtered. The solvent was removed under reduced pressure. The crude mixture was

purified through neutral alumina column chromatography using ethyl acetate : hexane (4:1) as eluent to give 8-chloro-5,6,11,11b-tetrahydro-1*H*-indolizino[8,7-*b*]indol-3(2*H*)-one in 88% yield (116 mg) as pale brown solid. (m.p. : 241-242 °C); IR (KBr, cm<sup>-1</sup>) : 3256, 2978, 2913, 2852, 2353, 1659, 1438, 1262, 641; <sup>1</sup>H-NMR (CDCl<sub>3</sub>, 400 MHz) : δ 7.88 (br s, 1H), 7.45 (d, *J* = 1.6 Hz, 1H), 7.25 (d, *J* = 6.8 Hz, 1H), 7.14 (dd, *J* = 8.6, 1.6 Hz, 1H), 4.94-4.90 (m, 1H), 4.53 (ddd, *J* = 13.2, 6.0, 1.6 Hz, 1H), 3.03 (td, *J* = 11.6, 6.0 Hz, 1H), 2.84 (ddd, *J* = 15.4, 6.0, 2.0 Hz, 1H), 2.81-2.74 (m, 1H), 2.68-2.49 (m, 3H), 2.04-1.90 (m, 1H); <sup>13</sup>C-NMR (DMSO-*d*<sub>6</sub>, 100 MHz) : 172.38, 136.57, 134.61, 127.63, 123.29, 120.88, 117.26, 112.68, 106.06, 53.55, 36.77, 31.01, 25.26, 20.60; HRMS (ESI) : [M+H]<sup>+</sup> Found 261.0784; Calculated 261.0795; for C<sub>14</sub>H<sub>14</sub>N<sub>2</sub>OCl.

### 8-Bromo-5,6,11,11b-tetrahydro-1*H*-indolizino[8,7-*b*]indol-3(2*H*)-one (2l)<sup>4</sup>

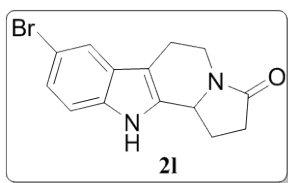

A 50 mL two neck round bottom flask was charged with 1-(2-(5-bromo-1*H*-indol-3-yl)ethyl)pyrrolidine-2,5-dione (80 mg, 0.249 mmol), 4Å molecular sieves (50 mg), anhydrous CH<sub>2</sub>Cl<sub>2</sub> (20 mL), and a stir bar. The flask was capped with a rubber septum and maintained in nitrogen atmosphere. Trifluoromethanesulfonic acid (220 μL, 2.491 mmol) was added and stirred at room temperature for 12 h. To this reaction mixture was added NaBH<sub>4</sub> (42 mg, 1.121 mmol), methanol (3 mL) and stirred for 0.5 h under nitrogen atmosphere. Then the reaction mixture was quenched with aqueous NaHCO<sub>3</sub>. Organic layer was separated and aqueous layer was extracted with ethyl acetate (3 x 50 mL). The combined organic layer was washed with aqueous NaHCO<sub>3</sub>, dried over anhydrous Na<sub>2</sub>SO<sub>4</sub> and filtered. The solvent was removed under reduced pressure. The crude mixture was purified through neutral alumina column chromatography using ethyl acetate : hexane (4:1) as eluent to give 8-bromo-5,6,11,11b-tetrahydro-1*H*-indolizino[8,7-*b*]indol-3(2*H*)-one in 85% yield (65 mg) as off white solid. (m.p. : 260-261 °C); IR (KBr, cm<sup>-1</sup>) : 3260, 2966, 2844, 1661, 1437, 1304, 793; <sup>1</sup>H-NMR (CDCl<sub>3</sub>, 400 MHz) : δ 8.10 (br s, 1H), 7.61 (s, 1H), 7.27 (d, *J* = 5.6 Hz, 1H), 7.20 (d, *J* = 8.5 Hz, 1H), 4.94-4.90 (m, 1H), 4.52 (dd, *J* = 13.6, 5.6 Hz, 1H), 3.02 (td, *J* = 11.2, 5.6 Hz, 1H), 2.83 (dd, *J* = 16.0, 5.6 Hz, 1H), 2.79-2.74 (m, 1H), 2.67-2.48 (m, 3H), 1.99-1.89 (m, 1H); <sup>13</sup>C-NMR (DMSO-*d*<sub>6</sub>, 100 MHz) : 172.32, 136.37, 134.83, 128.32, 123.40, 120.27, 113.15, 111.20, 105.96, 53.50, 36.74, 31.00, 25.25, 20.58.

### 10-Fluoro-5,6,11,11b-tetrahydro-1*H*-indolizino[8,7-*b*]indol-3(2*H*)-one (2m)

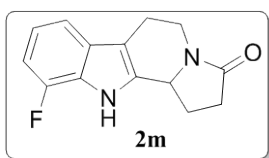

A 50 mL two neck round bottom flask was charged with 1-(2-(7-fluoro-1*H*-indol-3-yl)ethyl)pyrrolidine-2,5-dione (100 mg, 0.384 mmol), 4Å molecular sieves (50 mg), anhydrous CH<sub>2</sub>Cl<sub>2</sub> (20 mL), and a stir bar. The flask was capped with a rubber septum and maintained in nitrogen atmosphere. Trifluoromethanesulfonic acid (340 μL, 3.842 mmol) was added and stirred at room temperature for 12 h. To this reaction mixture was added NaBH<sub>4</sub> (65 mg, 1.729 mmol), methanol (3 mL) and stirred for 0.5 h under nitrogen atmosphere. Then the reaction mixture was quenched with aqueous NaHCO<sub>3</sub>. Organic layer was separated and aqueous layer was extracted with ethyl acetate (3 x 50 mL). The combined organic layer was washed with aqueous NaHCO<sub>3</sub>, dried over anhydrous Na<sub>2</sub>SO<sub>4</sub> and filtered. The solvent was removed under reduced pressure. The crude mixture was purified through neutral alumina column chromatography using ethyl acetate : hexane (4:1) as eluent to give 10-fluoro-5,6,11,11b-tetrahydro-1*H*-indolizino[8,7-*b*]indol-3(2*H*)-one in 81% yield (76 mg) as pale brown solid. (m.p. : 219-220 °C); IR (KBr, cm<sup>-1</sup>) : 3221, 2924, 2855, 1672, 1437, 1352, 726; <sup>1</sup>H-NMR (acetone-*d*<sub>6</sub>, 400 MHz) : δ 10.3 (br s, 1H), 7.13 (d, *J* = 7.8 Hz, 1H), 6.85 (td, *J* = 7.8, 4.7 Hz, 1H), 6.73 (dd, *J* = 11.5, 7.8 Hz, 1H), 4.87-4.83 (m, 1H), 4.27 (ddd, *J* = 13.0, 5.8, 1.0 Hz, 1H), 2.91-2.83 (m, 1H), 2.65-2.52 (m, 3H), 2.41-2.32 (m, 1H), 2.17 (ddd, *J* = 16.3, 9.4, 2.4 Hz, 1H), 1.84-1.76 (m, 1H); <sup>13</sup>C-NMR (DMSO-*d*<sub>6</sub>, 100 MHz) : 172.41, 149.13 (d, *J* = 239.1 Hz, 1C), 135.95, 130.43, 123.61 (d, *J* = 12.8 Hz, 1C), 119.07, 114.17, 107.15, 106.08 (d, *J* = 15.8 Hz, 1C), 53.61, 36.74, 31.04, 25.48, 20.89; HRMS (ESI) (m/z) : [M+H]<sup>+</sup> Found 245.1100; Calculated 245.1090; for C<sub>14</sub>H<sub>14</sub>N<sub>2</sub>OF.

### 1,2,3,6,7,12b-Hexahydroindolo[2,3-*a*]quinolizin-4(12*H*)-one (2r)<sup>8</sup>

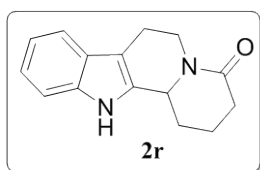

A 50 mL two neck round bottom flask was charged with 1-(2-(1*H*-indol-3-yl)ethyl)piperidine-2,6-dione (150 mg, 0.585 mmol), 4Å molecular sieves (50 mg), anhydrous CH<sub>2</sub>Cl<sub>2</sub> (20 mL), and a stir bar. The flask was capped with a rubber septum and maintained in nitrogen atmosphere. Trifluoromethanesulfonic acid (518 μL, 5.853 mmol) was added and stirred at room temperature for 12 h. To this reaction mixture was added NaBH<sub>4</sub> (100 mg, 2.634 mmol), methanol (3 mL) and stirred for 0.5 h under nitrogen atmosphere. Then the reaction mixture was quenched with aqueous NaHCO<sub>3</sub>. Organic layer was separated and aqueous layer was extracted with ethyl acetate (3 x 50 mL). The combined organic layer was washed with aqueous NaHCO<sub>3</sub>, dried over anhydrous Na<sub>2</sub>SO<sub>4</sub> and filtered. The solvent was removed under reduced pressure. The crude mixture was purified through neutral alumina column

chromatography using ethyl acetate : hexane (4:1) as eluent to give 1,2,3,6,7,12b-hexahydroindolo[2,3-*a*]quinolizin-4(12*H*)-one in 87% yield (122 mg) as off white solid. (m.p. : 239-240 °C, lit.<sup>8</sup> 240-241 °C); IR (KBr, cm<sup>-1</sup>) : 3265, 3052, 1596, 1434, 1262; <sup>1</sup>H-NMR (DMSO-*d*<sub>6</sub>, 400 MHz) : δ 10.92 (br s, 1H), 7.39 (d, *J* = 7.6 Hz, 1H), 7.31 (d, *J* = 8.0 Hz, 1H), 7.06 (t, *J* = 7.2 Hz, 1H), 6.97 (t, *J* = 7.2 Hz, 1H), 4.91 (dd, *J* = 12.4, 4.4 Hz, 1H), 4.78 (dd, *J* = 10.4, 4.4 Hz, 1H), 2.78 (td, *J* = 12.0, 4.0 Hz, 1H), 2.71-2.54 (m, 3H), 2.39-2.22 (m, 2H), 1.82-1.75 (m, 2H), 1.67-1.57 (m, 1H); <sup>13</sup>C-NMR (CDCl<sub>3</sub>, 100 MHz) : 169.19, 136.23, 133.32, 126.93, 122.18, 119.87, 118.43, 110.93, 109.67, 54.39, 40.15, 32.45, 29.10, 21.01, 19.42.

### 2,3,4,4a,7,8,13b,13c-Octahydro-1*H*-benzo[1,2]indolizino[8,7-*b*]indol-5(13*H*)-one (2q)

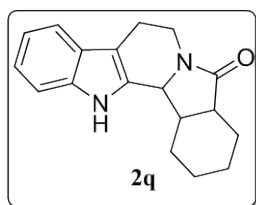

A 50 mL two neck round bottom flask was charged with 2-(2-(1*H*-indol-3-yl)ethyl)hexahydro-1*H*-isoindole-1,3(2*H*)-dione (80 mg, 0.270 mmol), 4Å molecular sieves (50 mg), anhydrous CH<sub>2</sub>Cl<sub>2</sub> (20 mL), and a stir bar. The flask was capped with a rubber septum and maintained in nitrogen atmosphere. Trifluoromethanesulfonic acid (239 μL, 2.699 mmol) was added and stirred at room temperature for 12 h. To this reaction mixture was added NaBH<sub>4</sub> (46 mg, 1.215 mmol), methanol (3 mL) and stirred for 0.5 h under nitrogen atmosphere. Then the reaction mixture was quenched with aqueous NaHCO<sub>3</sub>. Organic layer was separated and aqueous layer was extracted with ethyl acetate (3 x 50 mL). The combined organic layer was washed with aqueous NaHCO<sub>3</sub>, dried over anhydrous Na<sub>2</sub>SO<sub>4</sub> and filtered. The solvent was removed under reduced pressure. The crude mixture was purified through neutral alumina column chromatography using ethyl acetate : hexane (4:1) as eluent to give 2,3,4,4a,7,8,13b,13c-octahydro-1*H*-benzo[1,2]indolizino[8,7-*b*]indol-5(13*H*)-one in 62% yield (47 mg) as pale yellow solid. (m.p. : 248-249 °C); IR (KBr, cm<sup>-1</sup>) : 3293, 2929, 2851, 1668, 1430, 1250; <sup>1</sup>H-NMR (CDCl<sub>3</sub>, 400 MHz) : δ 7.94 (br s, 1H), 7.51 (d, *J* = 8.0 Hz, 1H), 7.34 (d, *J* = 8.0 Hz, 1H), 7.18 (t, *J* = 7.6 Hz, 1H), 7.13 (t, *J* = 7.6 Hz, 1H), 4.85 (d, *J* = 4.8 Hz, 1H), 4.54 (dd, *J* = 12.8, 5.6 Hz, 1H), 2.98 (td, *J* = 11.6, 4.4 Hz, 1H), 2.88 (dd, *J* = 15.2, 4.4 Hz, 1H), 2.84-2.80 (m, 1H), 2.76 (t, *J* = 5.6 Hz, 1H), 2.68-2.64 (m, 1H), 2.32 (d, *J* = 14.0 Hz, 1H), 1.56-1.46 (m, 3H), 1.28-1.24 (m, 1H), 1.12-1.01 (m, 2H), 0.83-0.74 (m, 1H); <sup>13</sup>C-NMR (CDCl<sub>3</sub>, 100 MHz) : 173.87, 136.53, 130.20, 127.02, 122.27, 119.93, 118.46, 111.02, 110.43,

56.47, 43.13, 38.25, 37.45, 29.84, 23.85, 23.19, 22.77, 21.25; HRMS (ESI) (m/z) : [M+H]<sup>+</sup>  
Found 281.1652; Calculated 281.1654; for C<sub>18</sub>H<sub>21</sub>N<sub>2</sub>O.

### (G) Synthesis of (±)-harmicine

#### 2,3,5,6,11,11b-hexahydro-1*H*-indolizino[8,7-*b*]indole (4)<sup>9</sup>

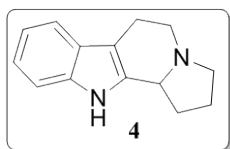

Lithium aluminium hydride (252 mg, 6.629 mmol) was weighed into a pre-dried two neck round bottom flask fitted with a condenser under nitrogen atmosphere. 5,6,11,11b-tetrahydro-1*H*-indolizino[8,7-*b*]indol-3(2*H*)-one (100 mg, 0.442 mmol) was added to the reaction flask under nitrogen atmosphere. Anhydrous tetrahydrofuran was added to the reaction mixture at 0 °C and the reaction mixture was stirred at room temperature for 24 h. After checking TLC, *tert*-butyl methyl ether (25.0 mL) was added and the reaction was quenched by careful addition of saturated aqueous sodium potassium tartrate solution. The mixture was stirred for 1 h before the addition of anhydrous Na<sub>2</sub>SO<sub>4</sub> prior to filtration through celite pad. The filtrate was evaporated under reduced pressure to give of 2,3,5,6,11,11b-hexahydro-1*H*-indolizino[8,7-*b*]indole, 73 mg (78%), as colorless solid. (m.p. : 171-172 °C, lit.<sup>9</sup> 174-175 °C); IR (KBr, cm<sup>-1</sup>) : 3433, 3054, 2940, 2842, 1453, 1305, 743; <sup>1</sup>H-NMR (CDCl<sub>3</sub>, 400 MHz) : δ 7.85 (br s, 1H), 7.48 (d, *J* = 7.6 Hz, 1H), 7.31 (d, *J* = 7.8 Hz, 1H), 7.14 (td, *J* = 7.2, 1.0 Hz, 1H), 7.09 (td, *J* = 7.6, 1.0 Hz, 1H), 4.26-4.23 (m, 1H), 3.33 (ddd, *J* = 13.2, 5.6, 2.4 Hz, 1H), 3.12-3.05 (m, 1H), 2.99-2.87 (m, 3H), 2.69-2.64 (m, 1H), 2.31-2.28 (m, 1H), 1.96-1.83 (m, 3H); <sup>13</sup>C-NMR (CDCl<sub>3</sub>, 100 MHz) : 136.10, 135.57, 127.52, 121.57, 119.55, 118.27, 110.84, 108.03, 57.09, 49.41, 46.10, 29.55, 23.58, 17.95.

### Synthesis of (±)-10-desbromoarborescidine-A

#### 1,2,3,4,6,7,12,12b-Octahydroindolo[2,3-*a*]quinolizine (5)<sup>10</sup>

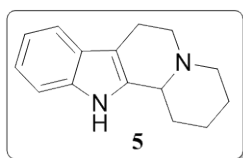

Lithium aluminium hydride (710 mg, 18.727 mmol) was weighed into a pre-dried two neck round bottom flask fitted with a condenser under nitrogen atmosphere. 1,2,3,6,7,12b-hexahydroindolo[2,3-*a*]quinolizin-4(12*H*)-one (300 mg, 1.248 mmol) was added to the reaction flask under nitrogen atmosphere. Anhydrous tetrahydrofuran was added to the reaction mixture at 0 °C and the reaction mixture was heated to reflux for 24 h. After checking TLC, *tert*-butyl methyl ether (25.0 mL) was added and the reaction was quenched by careful addition of

saturated aqueous sodium potassium tartrate solution. The mixture was stirred for 1 h before the addition of anhydrous  $\text{Na}_2\text{SO}_4$  prior to filtration through celite pad. The filtrate was evaporated under reduced pressure to give 1,2,3,4,6,7,12,12b-octahydroindolo[2,3-a]quinolizine, 178 mg (63%), as colorless solid. (m.p. : 144-145 °C, lit.<sup>10</sup> 146-148 °C); IR (KBr,  $\text{cm}^{-1}$ ) : 3191, 2922, 2848, 1448, 1321, 735;  $^1\text{H-NMR}$  ( $\text{CDCl}_3$ , 400 MHz) :  $\delta$  7.72 (br s, 1H), 7.47 (d,  $J = 7.6$  Hz, 1H), 7.30 (d,  $J = 7.8$  Hz, 1H), 7.15-7.07 (m, 2H), 3.24 (d,  $J = 11.0$  Hz, 1H), 3.10-2.98 (m, 3H), 2.75-2.59 (m, 2H), 2.39 (td,  $J = 11.0, 4.0$  Hz, 1H), 2.07 (dd,  $J = 12.0, 2.4$  Hz, 1H), 1.91 (dt,  $J = 12.0, 3.2$  Hz, 1H), 1.80-1.71 (m, 2H), 1.60 (ddd,  $J = 24.0, 12.0, 3.2$  Hz, 1H), 1.55-1.45 (m, 1H);  $^{13}\text{C-NMR}$  ( $\text{CDCl}_3$ , 100 MHz) : 136.09, 135.27, 127.64, 121.37, 119.47, 118.23, 110.83, 108.26, 60.37, 55.89, 53.69, 30.13, 25.88, 24.46, 21.73.

### (H) Crystal structures

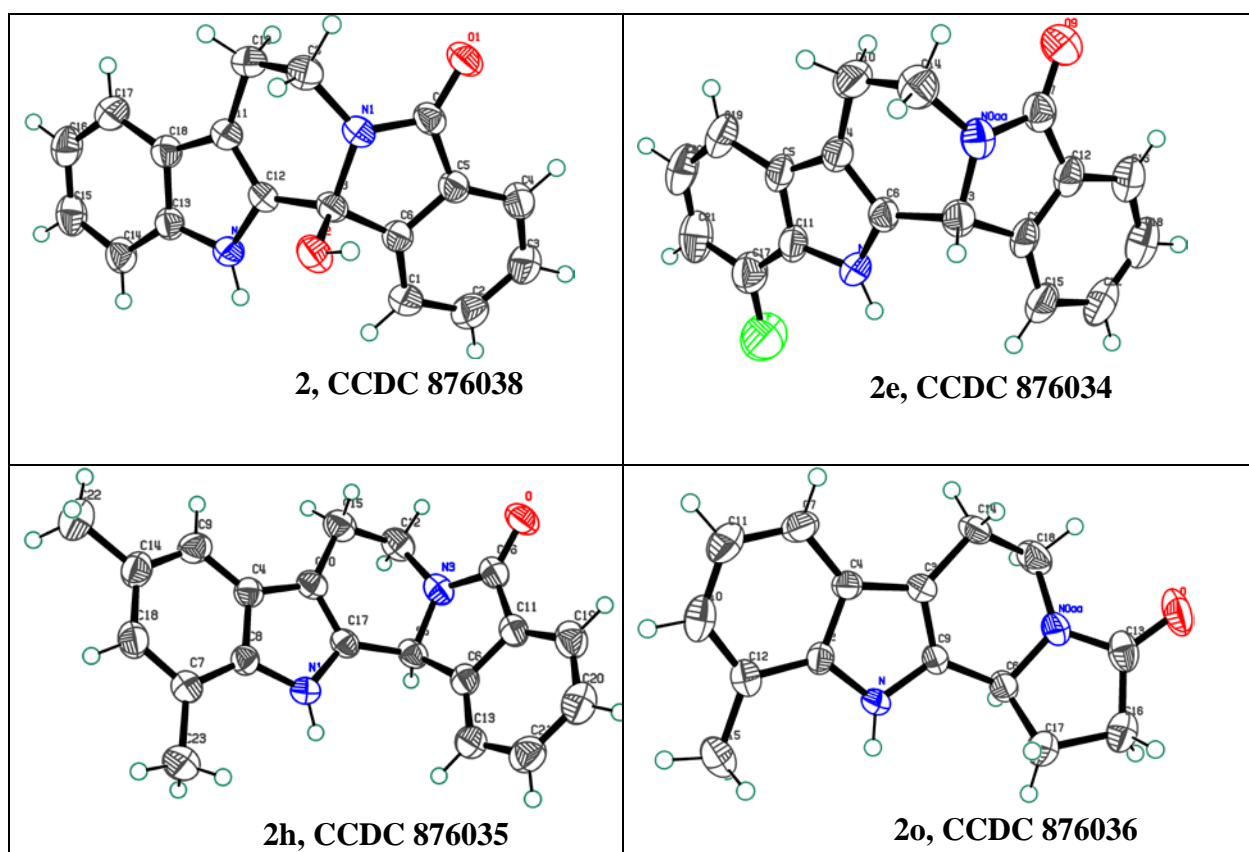

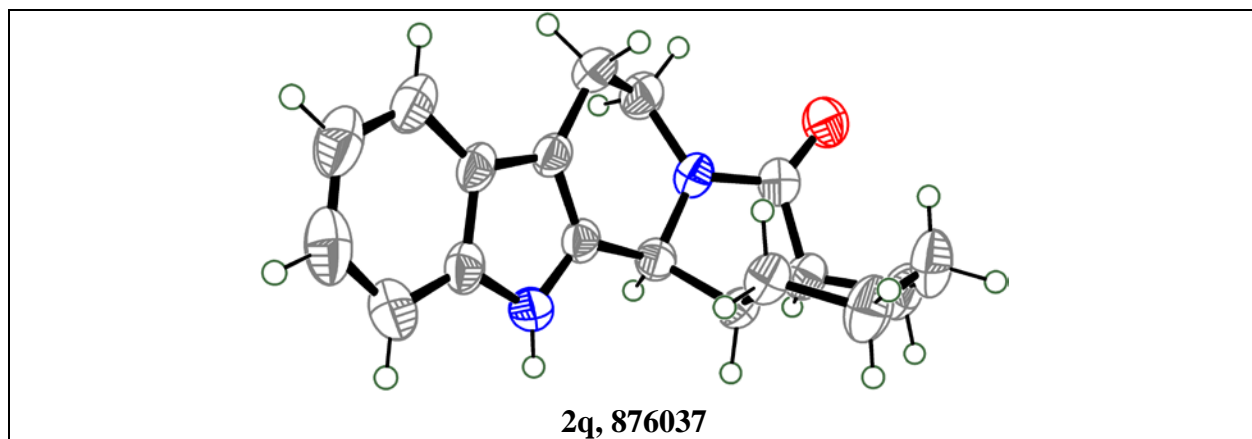

## (I) References

1. J. C. Eriks, H. Van der Goot, G. J. Sterk, H. Timmerman, *J. Med.Chem.*, 1992, **35**, 3239.
2. Y. Liu, S. Luo, X. Fu, F. Fang, Z. Zhuang, W. Xiong, X. Jia, H. Zhai, *Org. Lett.*, 2006, **8**, 115.
3. B. Hoefgen, M. Decker, P. Mohr, A. M. Schramm, S. A. F. Rostom, H. E. Subbagh, P. M. Schweikert, D. R. Rudolf, M. U. Kassack, J. Lehmann, *J. Med. Chem.*, 2006, **49**, 760.
4. I. T. Raheem, P. S. Thiara, E. A. Peterson, E. N. Jacobsen, *J. Am. Chem. Soc.*, 2007, **129**, 13404.
5. A. M. Schmidt, P. Eilbracht, *Org. Biomol. Chem.*, 2005, **3**, 2333.
6. C. Hu, H. Qin, Y. Cui, Y. Jia, *Tetrahedron*. 2009, **65**, 9075.
7. W. A. da Silva, M. T. Rodrigues. Jr, N. Shankaraiah, R. B. Ferreira, C. K. Z. Andrade, R. A. Pilli, L. S. Santos, *Org. Lett.*, 2009, **11**, 3238.
8. E. Airiau, N. Girard, A. Mann, J. Salvadori, M. Taddei, *Org. Lett.*, 2009, **11**, 5314.
9. (a) W.-H. Chiou, G.-H. Lin, C.-C. Hsu, S. J. Chaterpaul, I. Ojima, *Org. Lett.*, 2009, **11**, 2659. (b) T. S. Kam, K. M. Sim, *Phytochemistry*. 1998, **47**, 145.
10. (a) S. M. Allin, C. I. Thomas, J. E. Allard, K. Doyle, M. R. J. Elsegood, *Eur. J. Org. Chem.*, 2005, 4179. (b) M. Chbani, M. Pais, *J. Nat. Prod.*, 1993, **56**, 99.



PROTON CDC13 {D:\CRR} crr 1

7.8536  
7.8459  
7.8399  
7.8323  
7.7247  
7.7171  
7.7111  
7.7034

3.7608  
3.7431  
3.7252  
3.7128  
3.6968  
3.6809  
1.8235  
1.8051  
1.7987  
1.7869  
1.7806  
1.7688  
1.7498  
1.6554  
1.6398  
1.6348  
1.6239  
1.6188  
1.6111  
1.6028  
1.5853

Current Data Parameters  
NAME SMR-I-53-2  
EXPNO 1  
PROCNO 1

F2 - Acquisition Parameters  
Date\_ 20100321  
Time 18.14  
INSTRUM spect  
PROBHD 5 mm BBO BB-1H  
PULPROG zg30  
TD 32768  
SOLVENT CDC13  
NS 16  
DS 2  
SWH 8223.685 Hz  
FIDRES 0.250967 Hz  
AQ 1.9923444 sec  
RG 362  
DW 60.800 usec  
DE 6.00 usec  
TE 296.7 K  
D1 2.00000000 sec  
TD0 1

==== CHANNEL f1 =====  
NUC1 1H  
P1 14.00 usec  
PL1 -0.90 dB  
SFO1 400.1324710 MHz

F2 - Processing parameters  
SI 32768  
SF 400.1300045 MHz  
WDW EM  
SSB 0  
LB 0.30 Hz  
GB 0  
PC 1.00

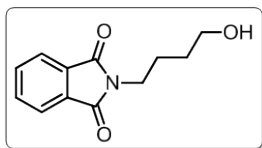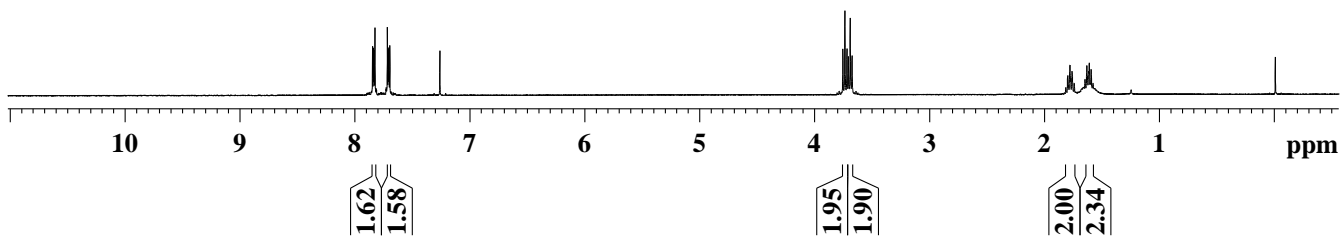

C13CPD CDC13 {D:\CRR} KOPAL 1

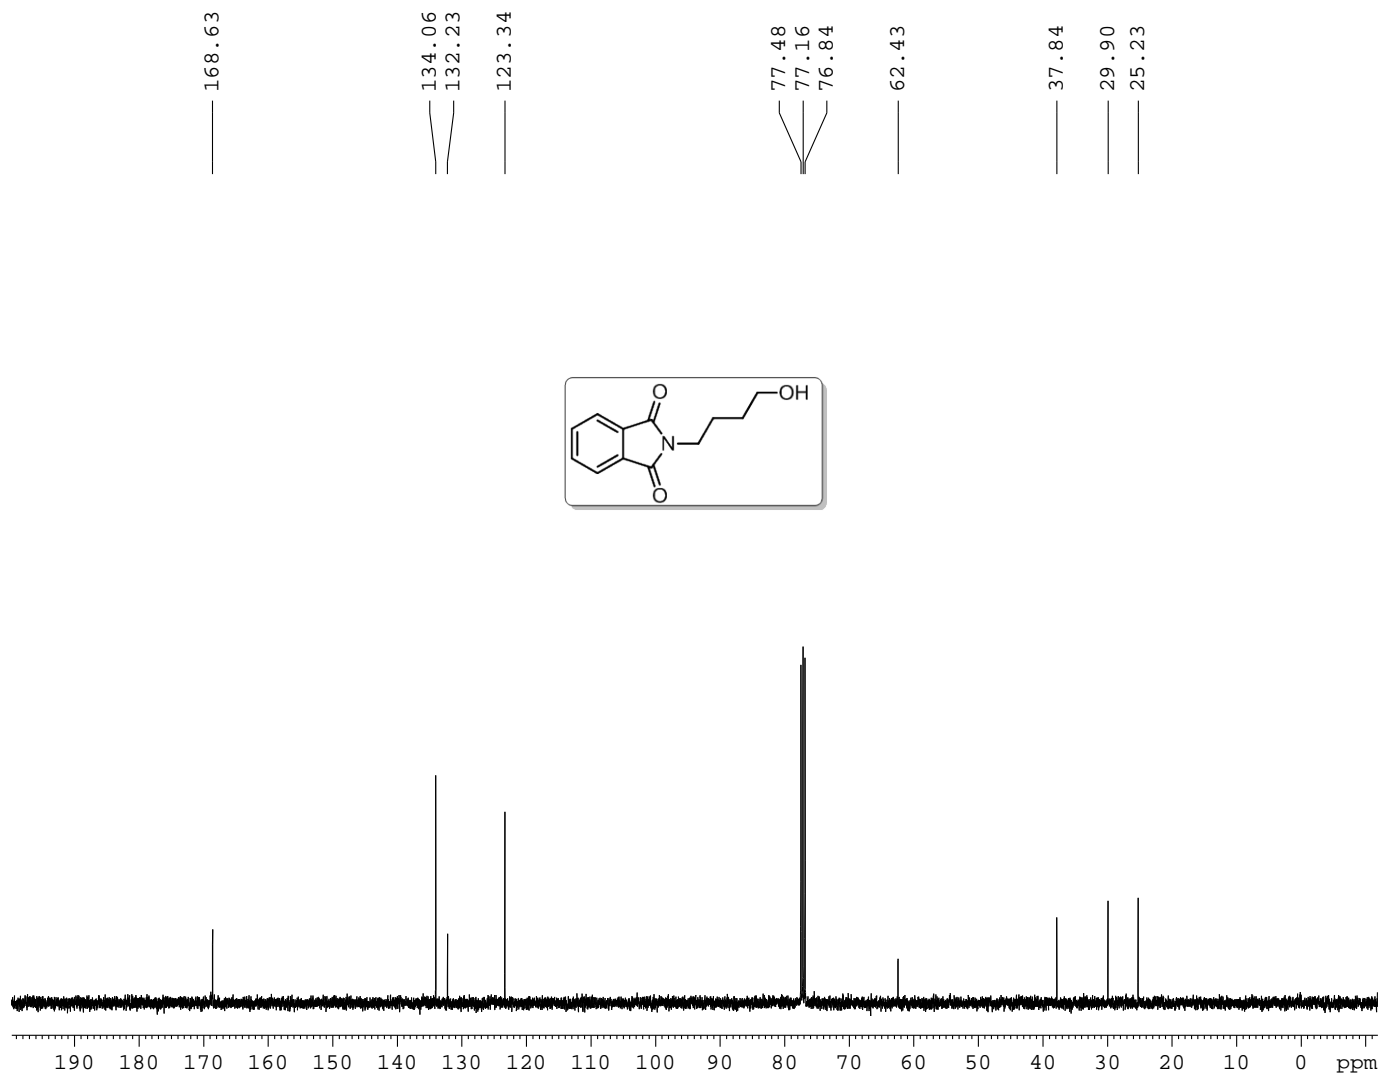

Current Data Parameters  
NAME SMR-PHOH  
EXPNO 2  
PROCNO 1

F2 - Acquisition Parameters  
Date\_ 20101102  
Time 13.15  
INSTRUM spect  
PROBHD 5 mm BBO BB-1H  
PULPROG zgpg30  
TD 65536  
SOLVENT CDC13  
NS 87  
DS 4  
SWH 24038.461 Hz  
FIDRES 0.366798 Hz  
AQ 1.3631988 sec  
RG 57  
DW 20.800 usec  
DE 6.00 usec  
TE 298.1 K  
D1 2.00000000 sec  
d11 0.03000000 sec  
DELTA 1.89999998 sec  
TD0 1

==== CHANNEL f1 =====  
NUC1 13C  
P1 9.50 usec  
PL1 -0.60 dB  
SFO1 100.6228298 MHz

==== CHANNEL f2 =====  
CPDPRG2 waltz16  
NUC2 1H  
PCPD2 90.00 usec  
PL12 15.60 dB  
PL13 15.60 dB  
PL2 -0.90 dB  
SFO2 400.1316005 MHz

F2 - Processing parameters  
SI 32768  
SF 100.6127546 MHz  
WDW EM  
SSB 0  
LB 1.00 Hz  
GB 0  
PC 1.40

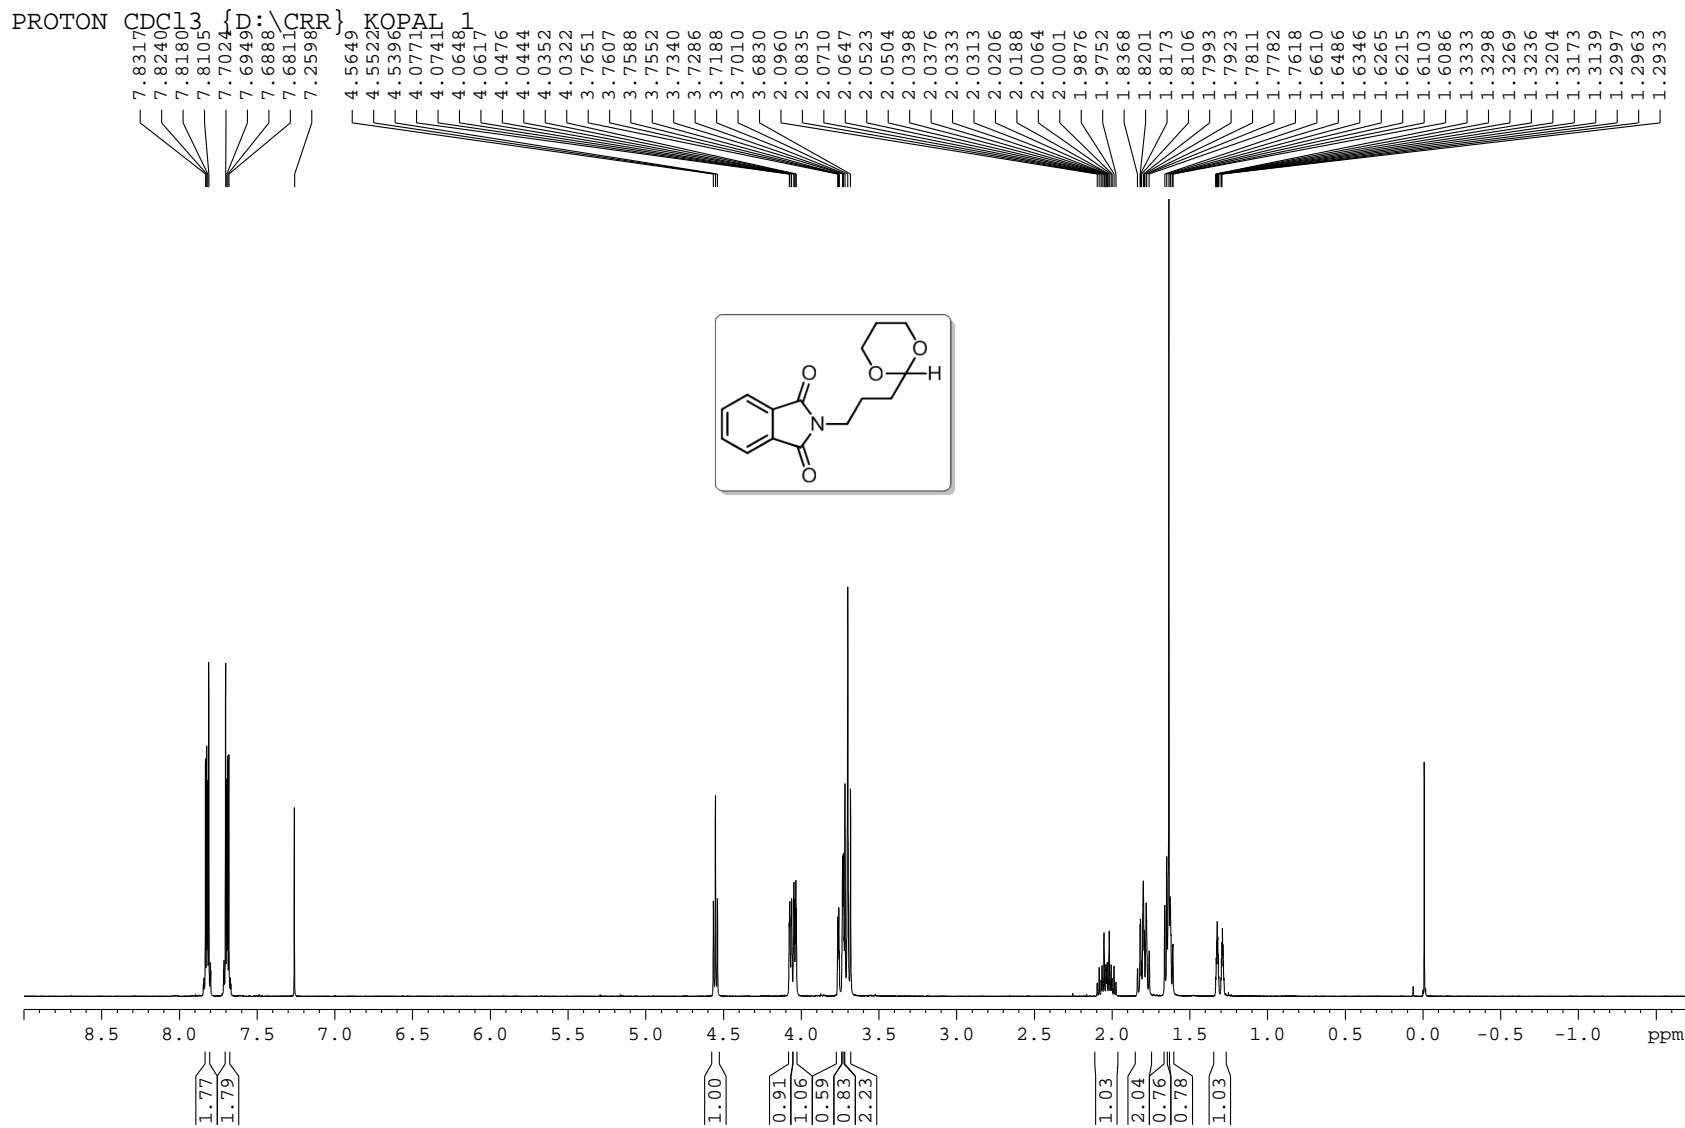

PROTON CDC13 {D:\CRR} KOPAL 1

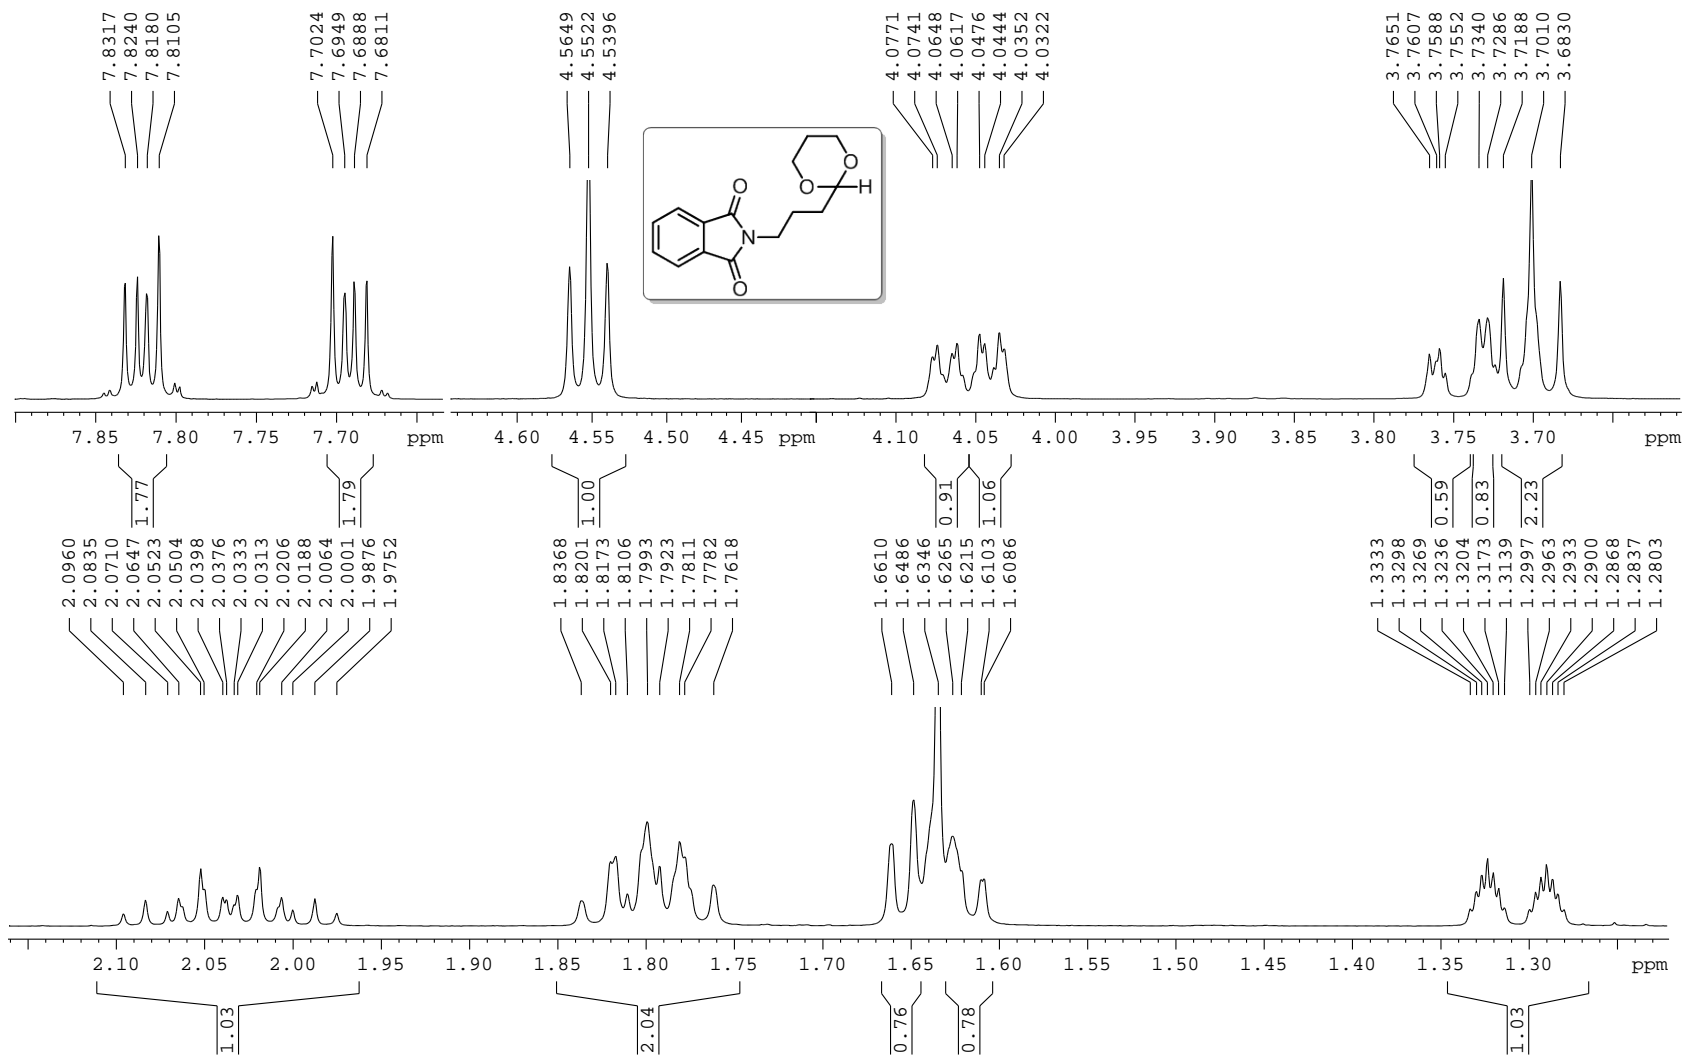

C13CPD CDC13 {D:\CRR} KOPAL 1

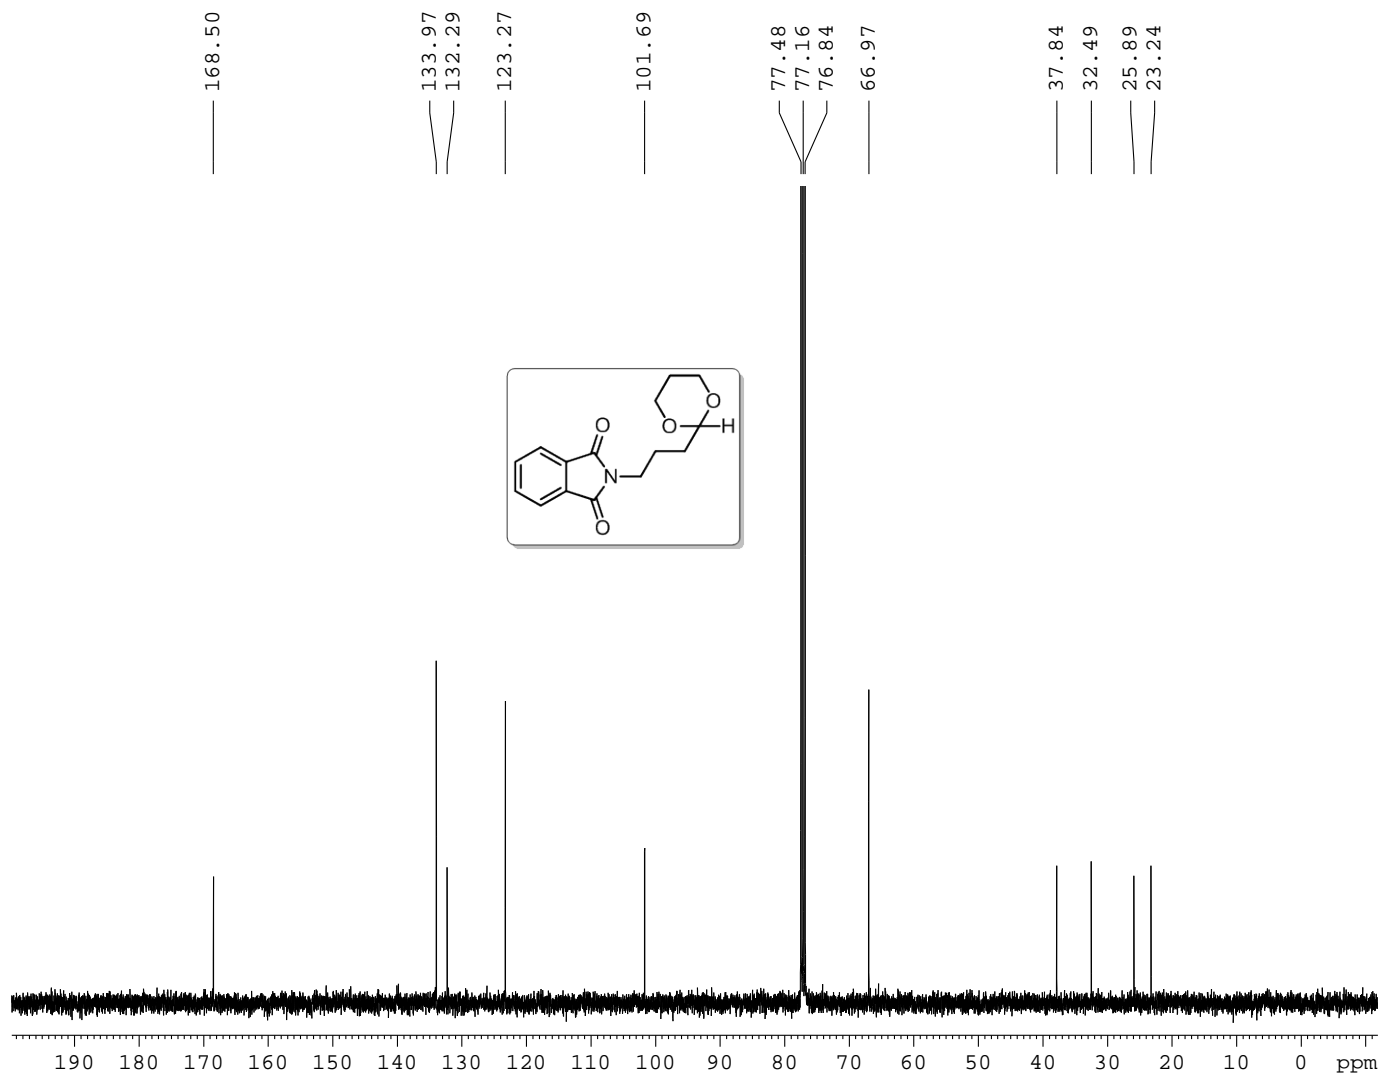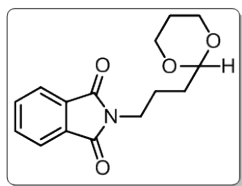

Current Data Parameters  
NAME SMR-PR  
EXPNO 2  
PROCNO 1

F2 - Acquisition Parameters  
Date\_ 20120307  
Time 11.29  
INSTRUM spect  
PROBHD 5 mm BBO BB-1H  
PULPROG zgpg30  
TD 65536  
SOLVENT CDC13  
NS 256  
DS 4  
SWH 24038.461 Hz  
FIDRES 0.366798 Hz  
AQ 1.3631988 sec  
RG 50.8  
DW 20.800 usec  
DE 6.00 usec  
TE 295.5 K  
D1 2.00000000 sec  
d11 0.03000000 sec  
DELTA 1.899999998 sec  
TD0 1

==== CHANNEL f1 =====  
NUC1 13C  
P1 9.50 usec  
PL1 -0.60 dB  
SFO1 100.6228298 MHz

==== CHANNEL f2 =====  
CPDPRG2 waltz16  
NUC2 1H  
PCPD2 90.00 usec  
PL12 15.60 dB  
PL13 15.60 dB  
PL2 -0.90 dB  
SFO2 400.1316005 MHz

F2 - Processing parameters  
SI 32768  
SF 100.6127546 MHz  
WDW EM  
SSB 0  
LB 1.00 Hz  
GB 0  
PC 1.40

S37

PROTON CDC13 {D:\CRR} KOPAL 1

8.0543  
7.8439  
7.8363  
7.8303  
7.8227  
7.7546  
7.7537  
7.7519  
7.7352  
7.7338  
7.7324  
7.7079  
7.7004  
7.6944  
7.6867  
7.3584  
7.3562  
7.3542  
7.3385  
7.3361  
7.3340  
7.2601  
7.2095  
7.2065  
7.1919  
7.1891  
7.1719  
7.1688  
7.1470  
7.1440  
7.1270  
7.1246  
7.1096  
7.1070  
7.0917  
7.0858

4.0368  
4.0211  
4.0175  
4.0130  
3.9978  
3.1863  
3.1849  
3.1711  
3.1667  
3.1649  
3.1618  
3.1474  
3.1457

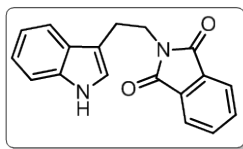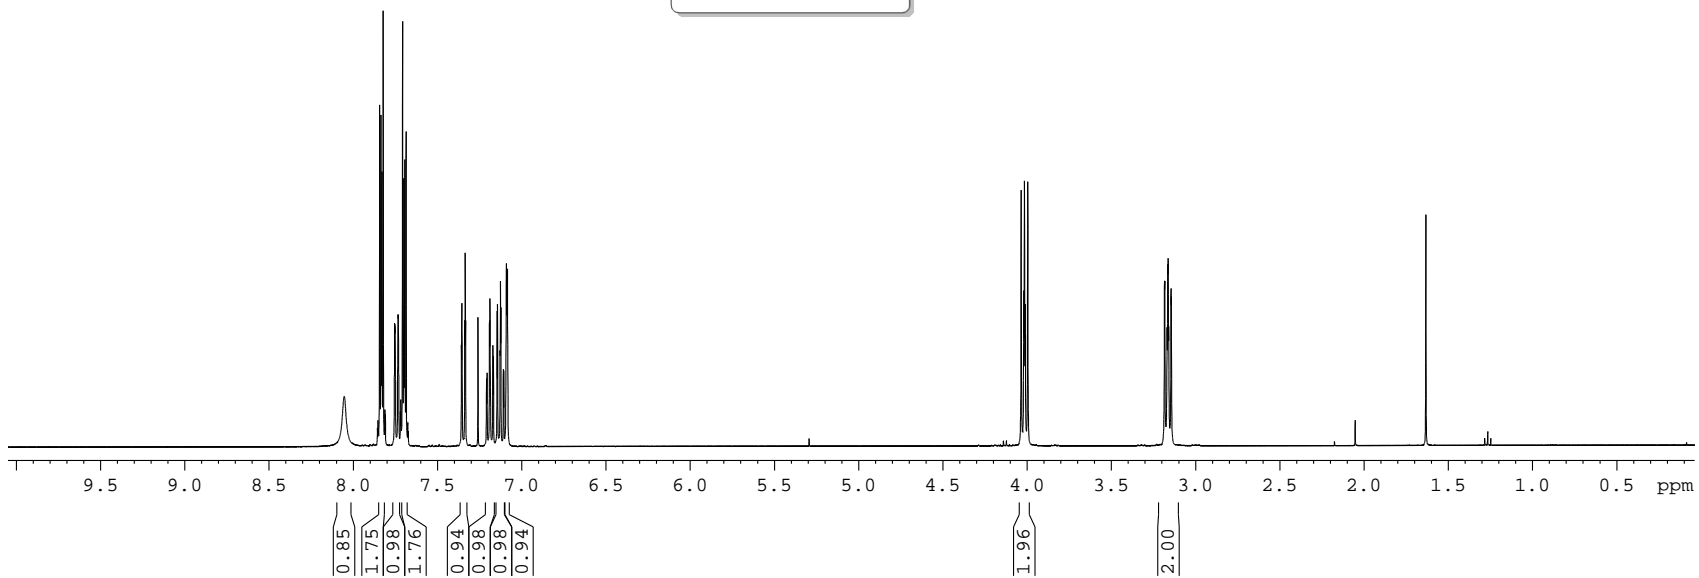

C13CPD CDC13 {D:\CRR} KOPAL 1

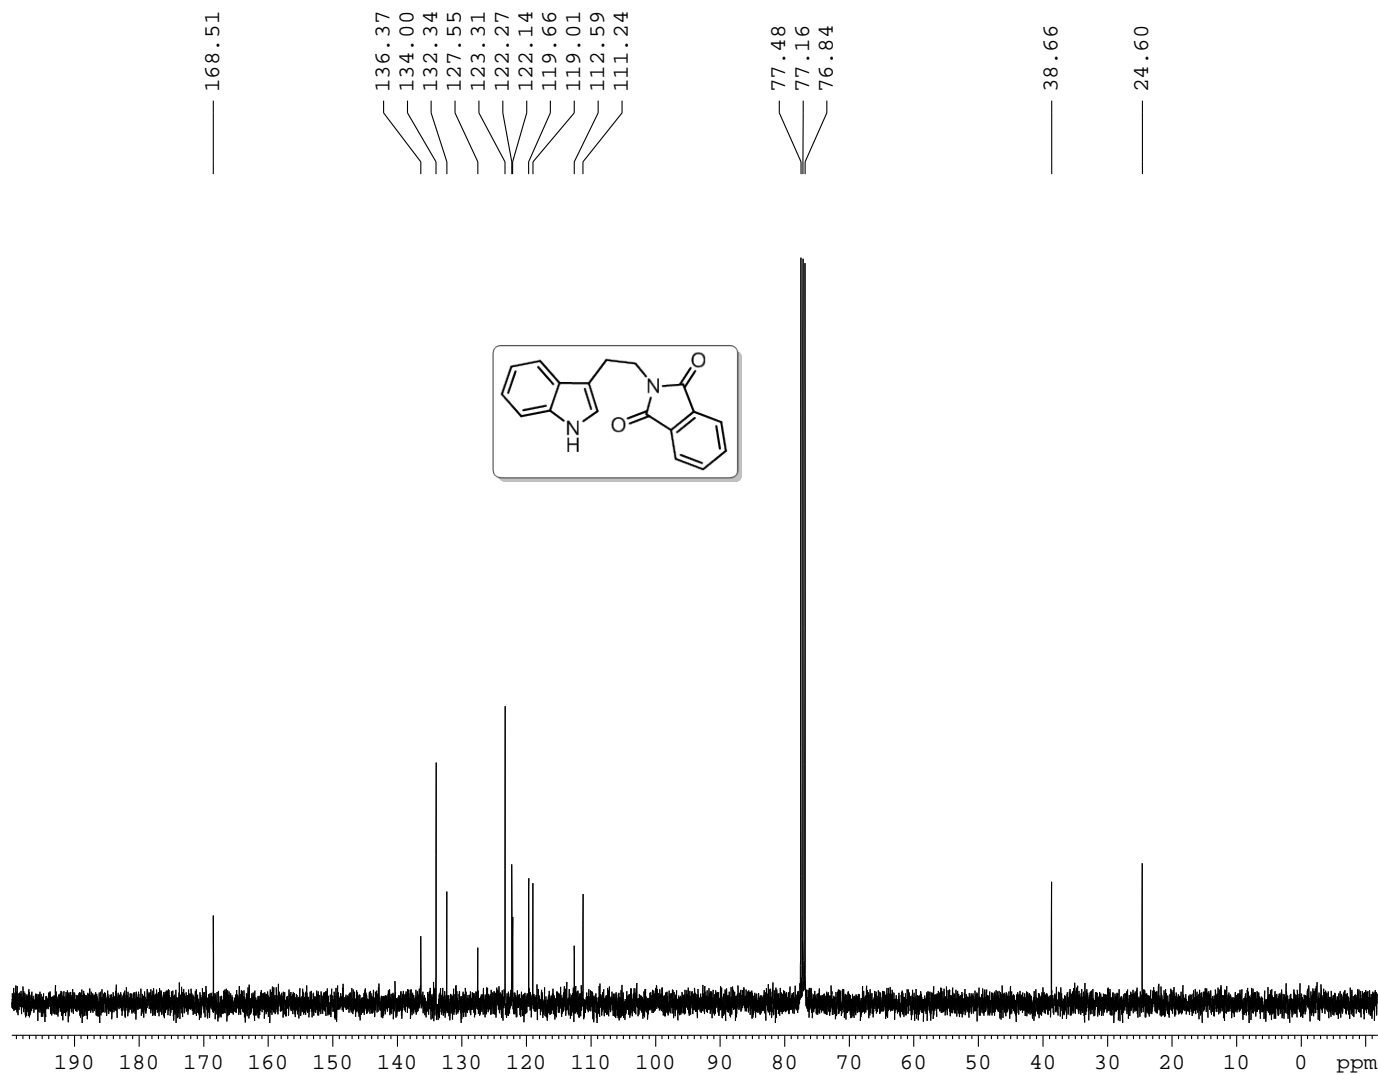

Current Data Parameters  
NAME SMR-PHIM  
EXPNO 2  
PROCNO 1

F2 - Acquisition Parameters  
Date\_ 20101102  
Time 13.29  
INSTRUM spect  
PROBHD 5 mm BBO BB-1H  
PULPROG zgpg30  
TD 65536  
SOLVENT CDC13  
NS 106  
DS 4  
SWH 24038.461 Hz  
FIDRES 0.366798 Hz  
AQ 1.3631988 sec  
RG 912  
DW 20.800 usec  
DE 6.00 usec  
TE 298.0 K  
D1 2.00000000 sec  
d11 0.03000000 sec  
DELTA 1.89999998 sec  
TD0 1

==== CHANNEL f1 =====  
NUC1 13C  
P1 9.50 usec  
PL1 -0.60 dB  
SFO1 100.6228298 MHz

==== CHANNEL f2 =====  
CPDPRG2 waltz16  
NUC2 1H  
PCPD2 90.00 usec  
PL12 15.60 dB  
PL13 15.60 dB  
PL2 -0.90 dB  
SFO2 400.1316005 MHz

F2 - Processing parameters  
SI 32768  
SF 100.6127547 MHz  
WDW EM  
SSB 0  
LB 1.00 Hz  
GB 0  
PC 1.40

PROTON CDC13 {D:\CRR} KOPAL 1

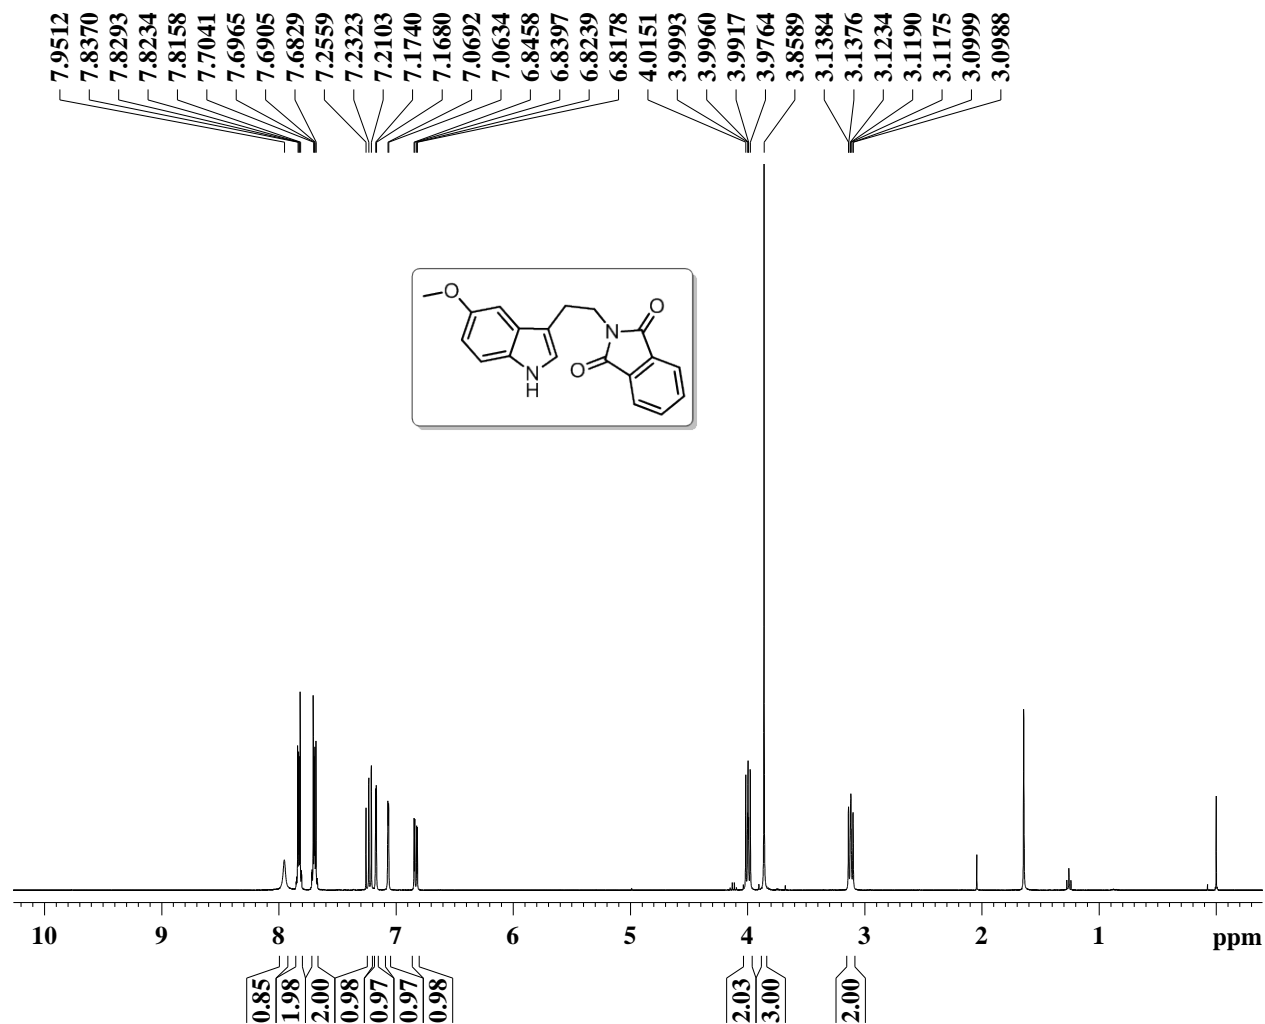

Current Data Parameters  
NAME SMR-1-156-1  
EXPNO 1  
PROCNO 1

F2 - Acquisition Parameters  
Date\_ 20101229  
Time 12.48  
INSTRUM spect  
PROBHD 5 mm BBO BB-1H  
PULPROG zg30  
TD 65536  
SOLVENT CDCl3  
NS 12  
DS 2  
SWH 8223.685 Hz  
FIDRES 0.125483 Hz  
AQ 3.9846387 sec  
RG 228  
DW 60.800 usec  
DE 6.000 usec  
TE 297.0 K  
D1 1.00000000 sec  
TD0 1

==== CHANNEL f1 =====  
NUC1 1H  
P1 14.00 usec  
PL1 -0.90 dB  
SFO1 400.1324710 MHz

F2 - Processing parameters  
SI 32768  
SF 400.1300056 MHz  
WDW EM  
SSB 0  
LB 0.30 Hz  
GB 0  
PC 1.00



C13CPD CDC13 {D:\CRR} KOPAL 1

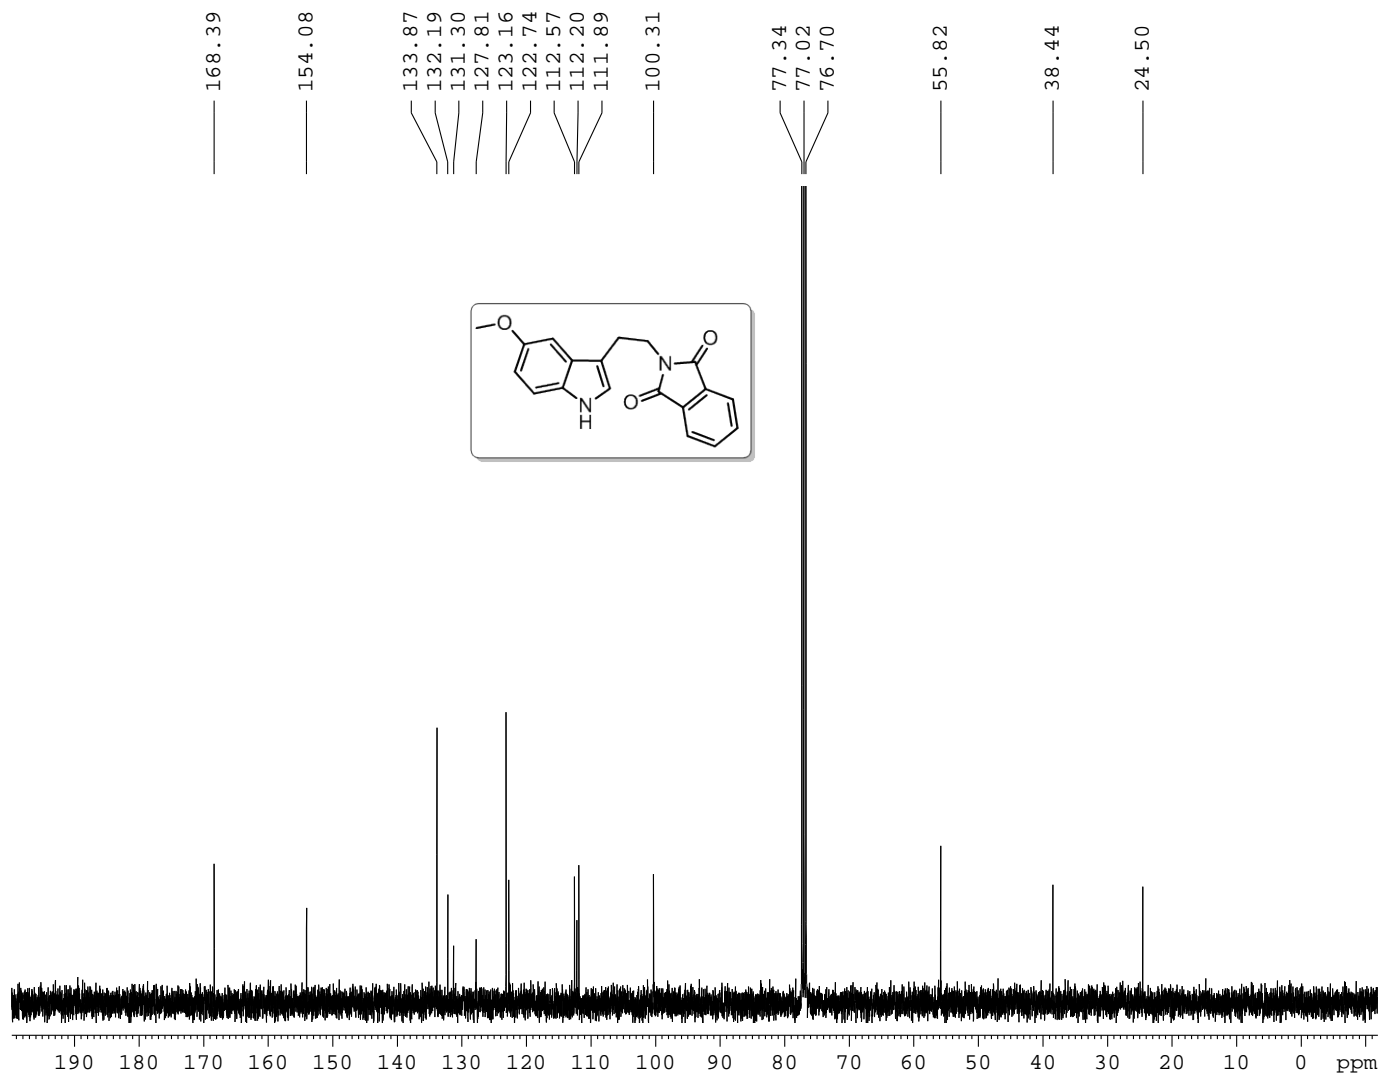

Current Data Parameters  
NAME SMR-1-156-1  
EXPNO 2  
PROCNO 1

F2 - Acquisition Parameters  
Date\_ 20101229  
Time 12.53  
INSTRUM spect  
PROBHD 5 mm BBO BB-1H  
PULPROG zgpg30  
TD 65536  
SOLVENT CDC13  
NS 63  
DS 4  
SWH 24038.461 Hz  
FIDRES 0.366798 Hz  
AQ 1.3631988 sec  
RG 1440  
DW 20.800 usec  
DE 6.00 usec  
TE 297.6 K  
D1 2.00000000 sec  
d11 0.03000000 sec  
DELTA 1.89999998 sec  
TD0 1

==== CHANNEL f1 =====  
NUC1 13C  
P1 9.50 usec  
PL1 -0.60 dB  
SFO1 100.6228298 MHz

==== CHANNEL f2 =====  
CPDPRG2 waltz16  
NUC2 1H  
PCPD2 90.00 usec  
PL12 15.60 dB  
PL13 15.60 dB  
PL2 -0.90 dB  
SFO2 400.1316005 MHz

F2 - Processing parameters  
SI 32768  
SF 100.6127690 MHz  
WDW EM  
SSB 0  
LB 1.00 Hz  
GB 0  
PC 1.40

S41

PROTON CDCl3 {D:\CRR} KOPAL 1

7.9477  
7.8486  
7.8409  
7.8352  
7.8276  
7.7126  
7.7050  
7.6991  
7.6915  
7.6120  
7.5925  
7.2599  
7.1135  
7.1083  
7.0786  
7.0604  
7.0413  
7.0049  
6.9873

4.0312  
4.0119  
4.0073  
3.9921

3.1747  
3.1548  
3.1358

2.4755

1.5912

1.2610

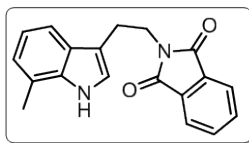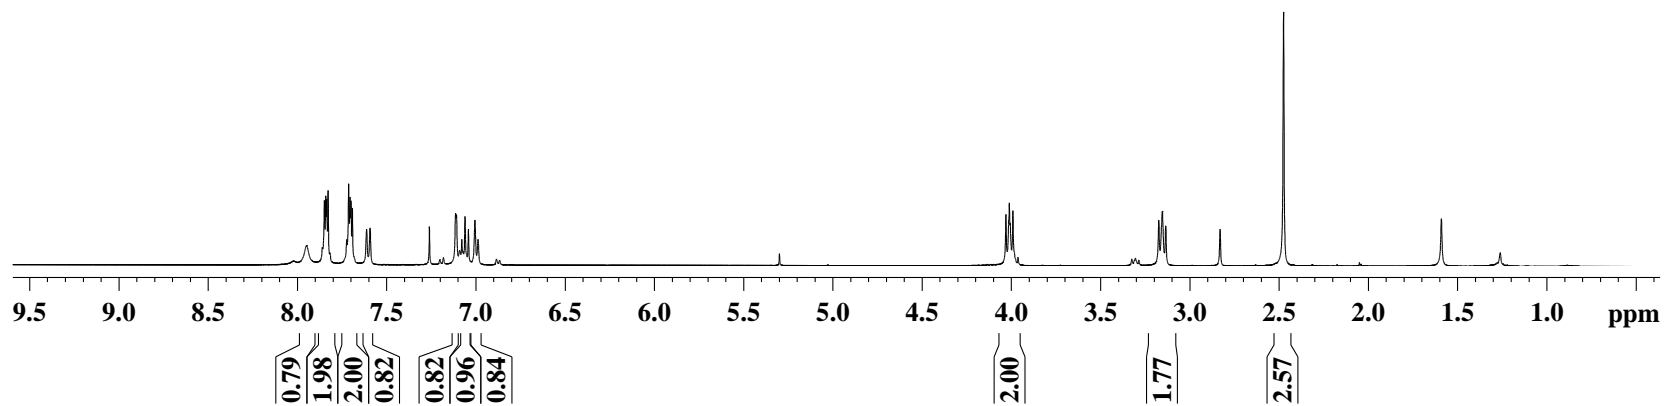

C13CPD CDC13 {D:\CRR} KOPAL 1

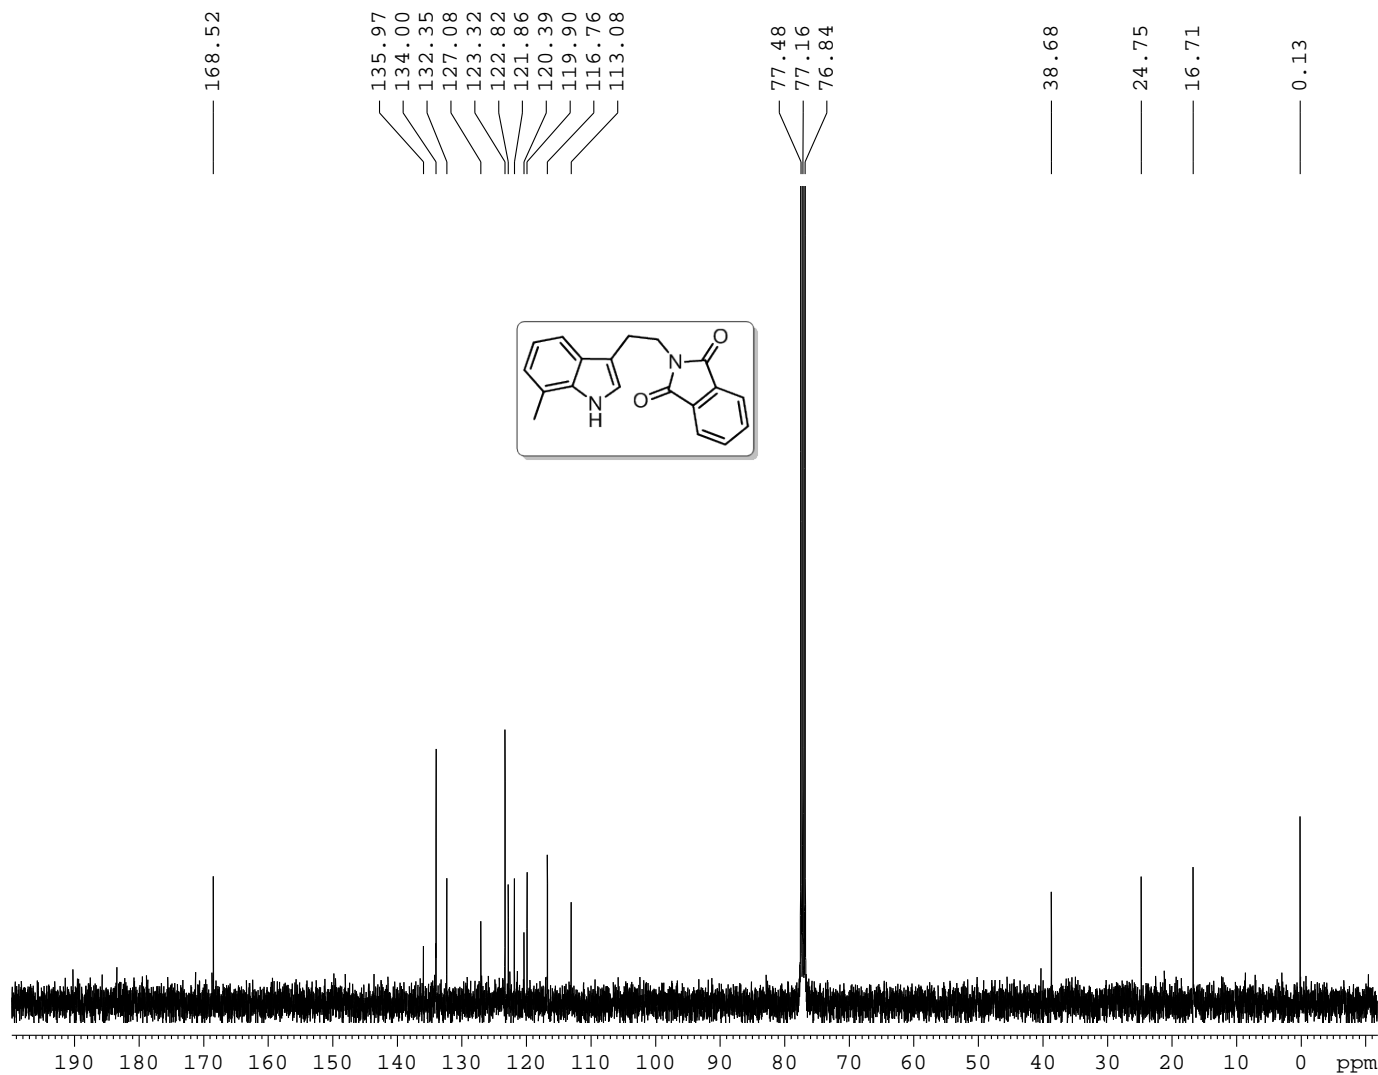

Current Data Parameters  
NAME SMR-I-10-Me  
EXPNO 1  
PROCNO 1

F2 - Acquisition Parameters  
Date\_ 20110621  
Time 11.10  
INSTRUM spect  
PROBHD 5 mm BBO BB-1H  
PULPROG zgpg30  
TD 65536  
SOLVENT CDC13  
NS 256  
DS 4  
SWH 24038.461 Hz  
FIDRES 0.366798 Hz  
AQ 1.3631988 sec  
RG 812  
DW 20.800 usec  
DE 6.00 usec  
TE 296.3 K  
D1 2.00000000 sec  
d11 0.03000000 sec  
DELTA 1.89999998 sec  
TD0 1

==== CHANNEL f1 =====  
NUC1 13C  
P1 9.50 usec  
PL1 -0.60 dB  
SFO1 100.6228298 MHz

==== CHANNEL f2 =====  
CPDPRG2 waltz16  
NUC2 1H  
PCPD2 90.00 usec  
PL12 15.60 dB  
PL13 15.60 dB  
PL2 -0.90 dB  
SFO2 400.1316005 MHz

F2 - Processing parameters  
SI 32768  
SF 100.6127540 MHz  
WDW EM  
SSB 0  
LB 1.00 Hz  
GB 0  
PC 1.40

PROTON CDC13 {D:\CRR} KOPAL 1

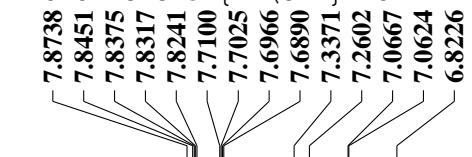

5.2975

4.0159  
3.9968  
3.9771

3.1416  
3.1218  
3.1029

2.4285  
2.4026

1.6296

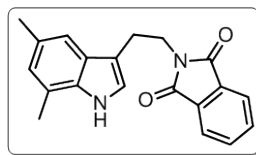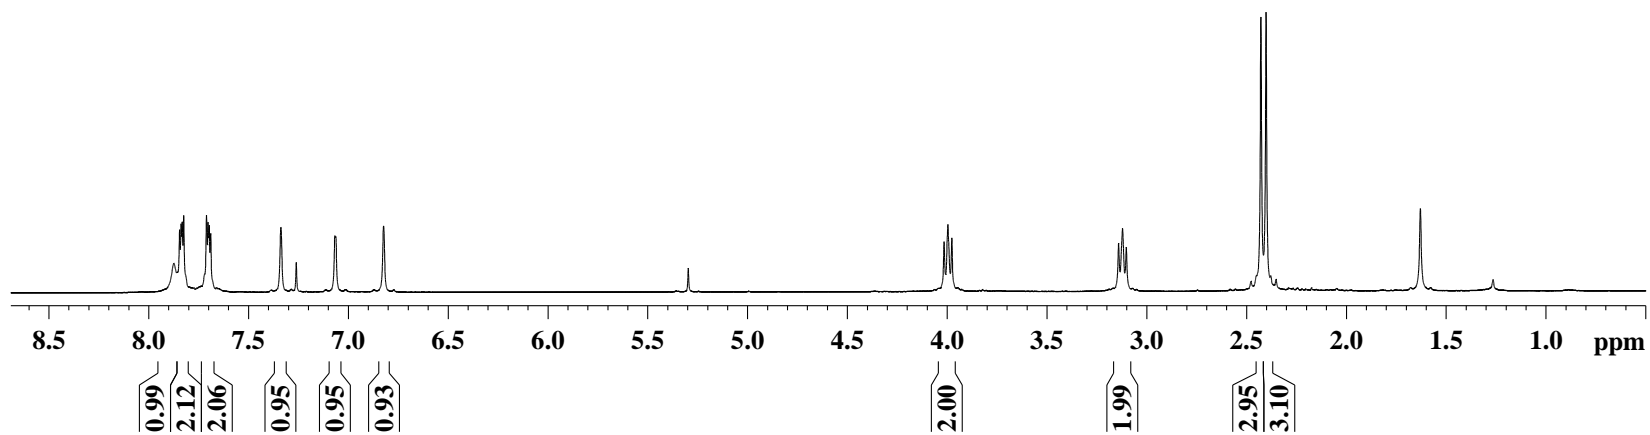

C13CPD CDC13 {D:\CRR} KOPAL 1

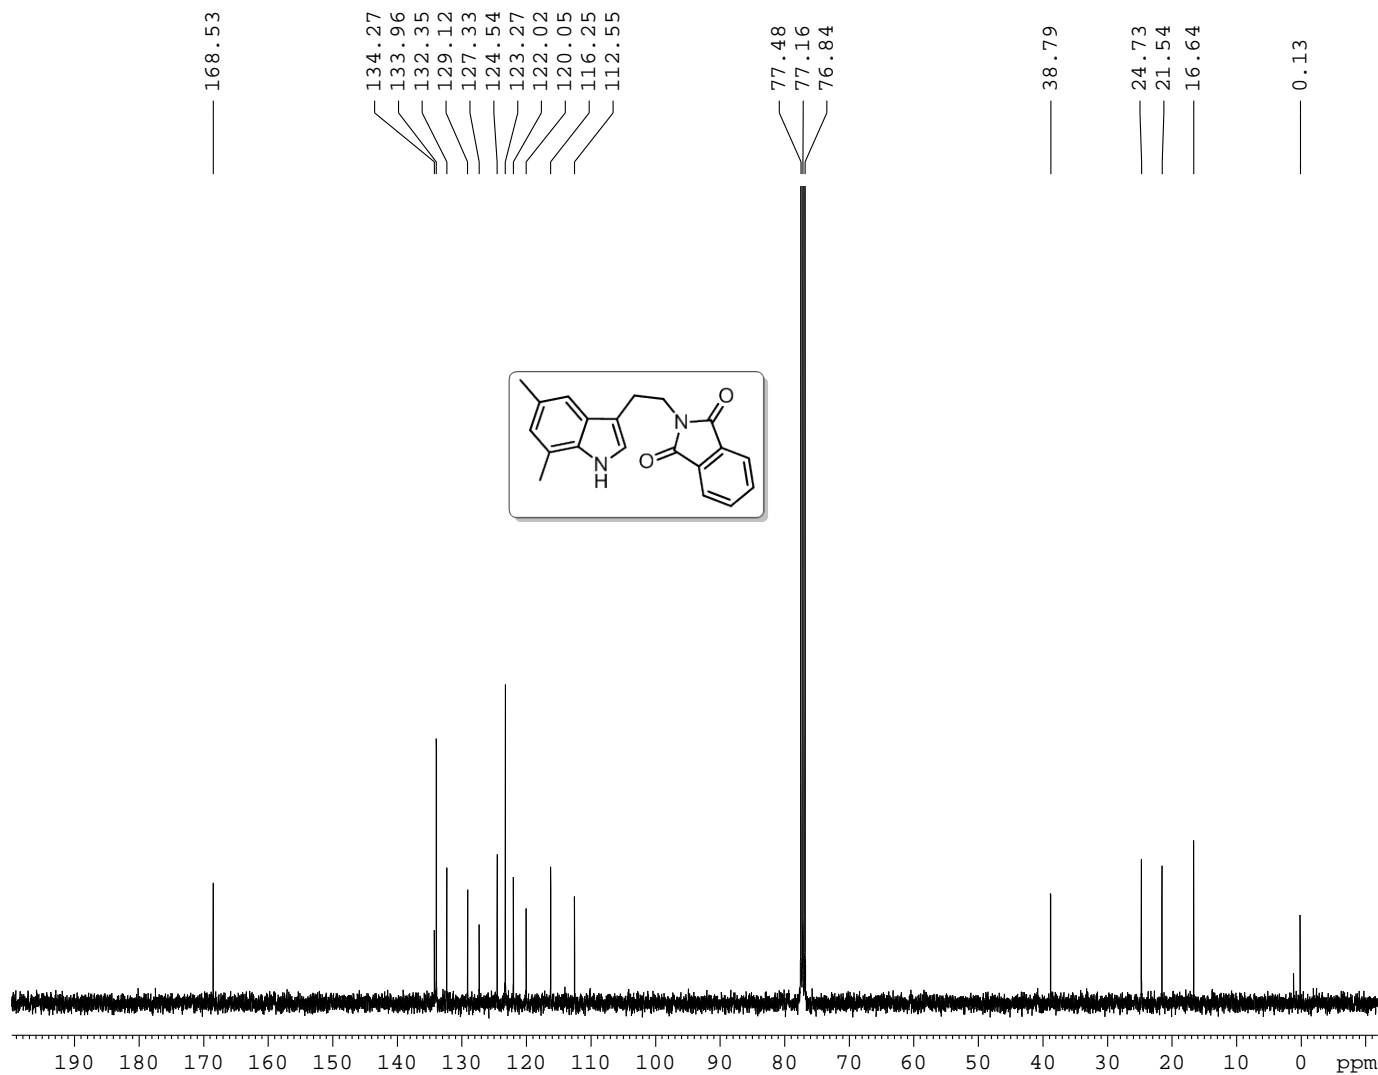

Current Data Parameters  
NAME SMR-I-100-Di  
EXPNO 1  
PROCNO 1

F2 - Acquisition Parameters  
Date\_ 20110621  
Time 11.30  
INSTRUM spect  
PROBHD 5 mm BBO BB-1H  
PULPROG zgpg30  
TD 65536  
SOLVENT CDC13  
NS 256  
DS 4  
SWH 24038.461 Hz  
FIDRES 0.366798 Hz  
AQ 1.3631988 sec  
RG 45.2  
DW 20.800 usec  
DE 6.00 usec  
TE 296.2 K  
D1 2.00000000 sec  
d11 0.03000000 sec  
DELTA 1.89999998 sec  
TD0 1

==== CHANNEL f1 =====  
NUC1 13C  
P1 9.50 usec  
PL1 -0.60 dB  
SFO1 100.6228298 MHz

==== CHANNEL f2 =====  
CPDPRG2 waltz16  
NUC2 1H  
PCPD2 90.00 usec  
PL12 15.60 dB  
PL13 15.60 dB  
PL2 -0.90 dB  
SFO2 400.1316005 MHz

F2 - Processing parameters  
SI 32768  
SF 100.6127561 MHz  
WDW EM  
SSB 0  
LB 1.00 Hz  
GB 0  
PC 1.40

S45

PROTON CDC13 {D:\CRR} KOPAL 1

7.8389  
7.8313  
7.8254  
7.8178  
7.7113  
7.7037  
7.6978  
7.6902  
7.3633  
7.3574  
7.3394  
7.3337  
7.2600  
7.2507  
7.2394  
7.2287  
7.1273  
7.1222  
6.9432  
6.9371  
6.9206  
6.9146  
6.8981  
6.8921

4.0012  
3.9823  
3.9629

3.1243  
3.1045  
3.0861

1.6093

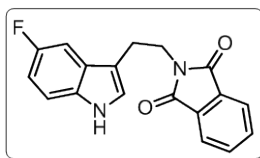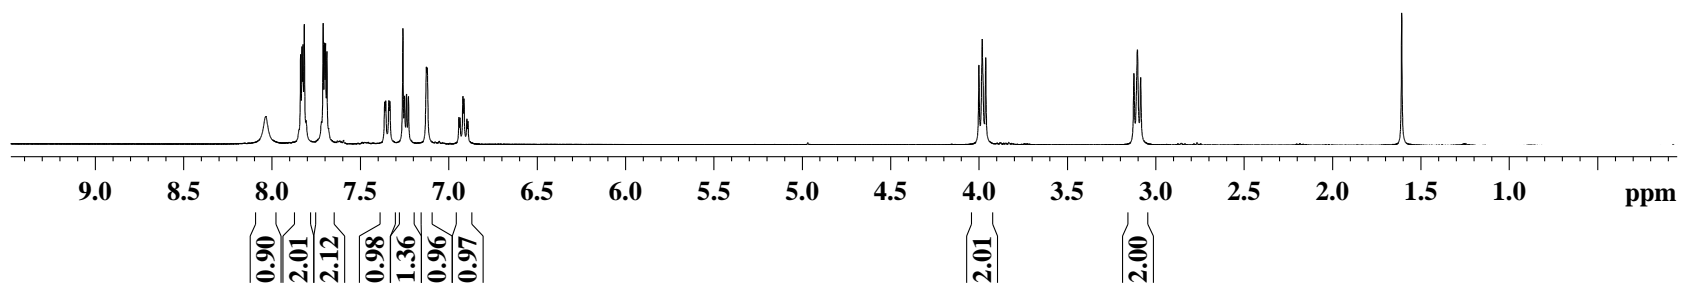

C13CPD CDC13 {D:\CRR} KOPAL 1

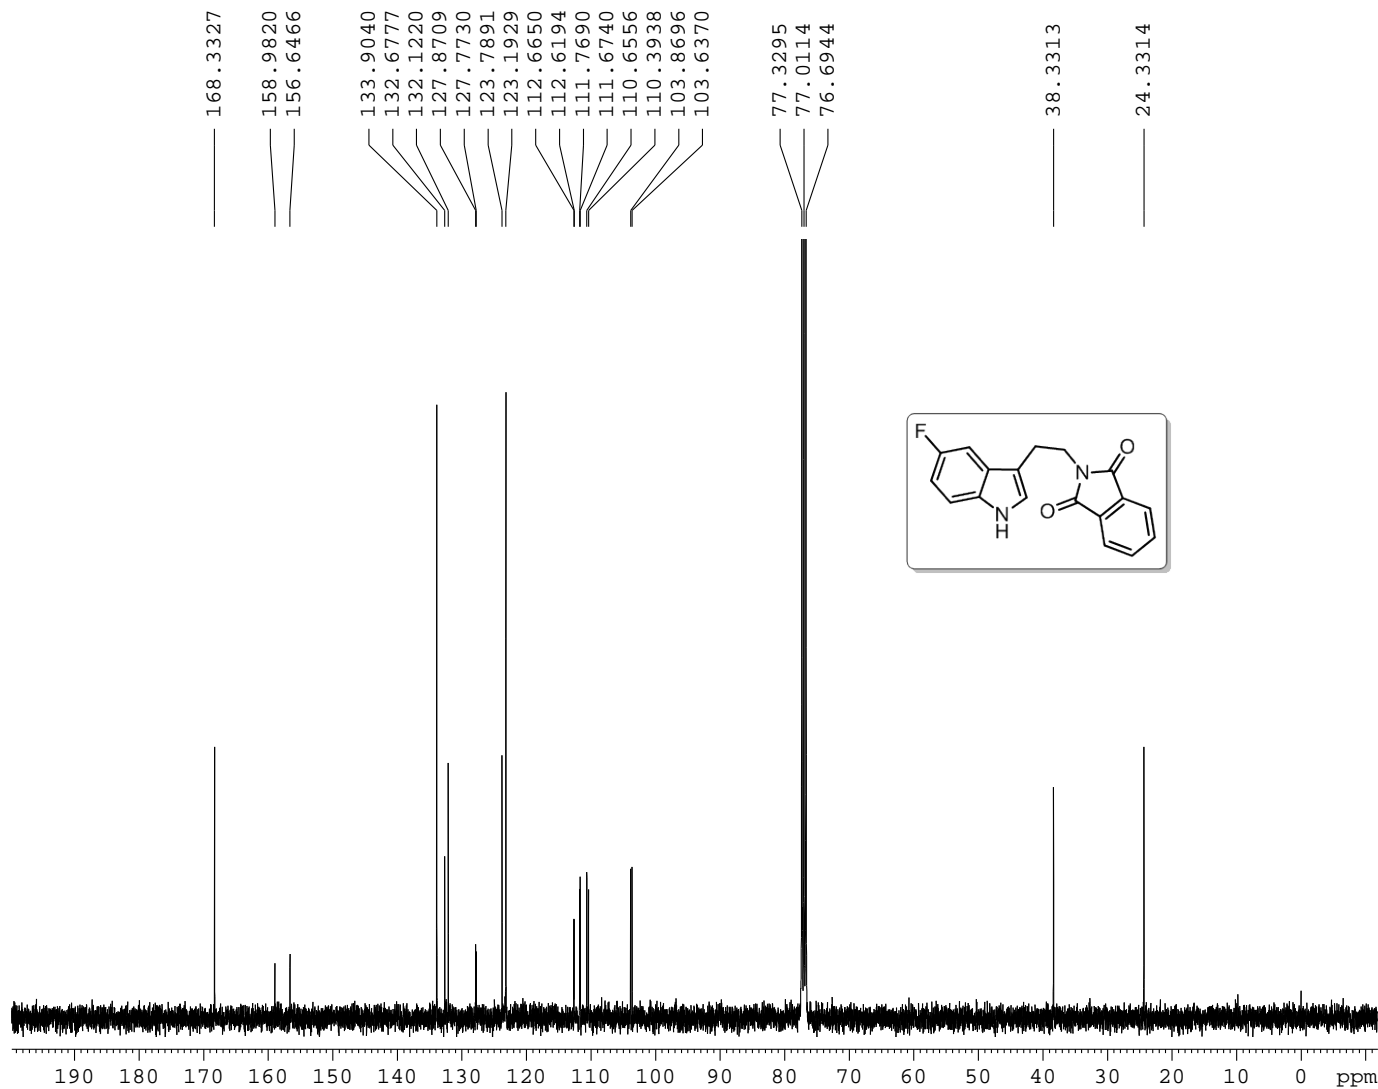

Current Data Parameters  
NAME SMR-Con-A  
EXPNO 1  
PROCNO 1

F2 - Acquisition Parameters  
Date\_ 20120130  
Time 18.32  
INSTRUM spect  
PROBHD 5 mm BBO BB-1H  
PULPROG zgpg30  
TD 65536  
SOLVENT CDC13  
NS 1024  
DS 4  
SWH 24038.461 Hz  
FIDRES 0.366798 Hz  
AQ 1.3631988 sec  
RG 50.8  
DW 20.800 usec  
DE 6.00 usec  
TE 297.1 K  
D1 2.00000000 sec  
d11 0.03000000 sec  
DELTA 1.89999998 sec  
TD0 1

==== CHANNEL f1 =====  
NUC1 13C  
P1 9.50 usec  
PL1 -0.60 dB  
SFO1 100.6228298 MHz

==== CHANNEL f2 =====  
CPDPRG2 waltz16  
NUC2 1H  
PCPD2 90.00 usec  
PL12 15.60 dB  
PL13 15.60 dB  
PL2 -0.90 dB  
SFO2 400.1316005 MHz

F2 - Processing parameters  
SI 32768  
SF 100.6127690 MHz  
WDW EM  
SSB 0  
LB 1.00 Hz  
GB 0  
PC 1.40

PROTON CDC13 {D:\CRR} KOPAL 1

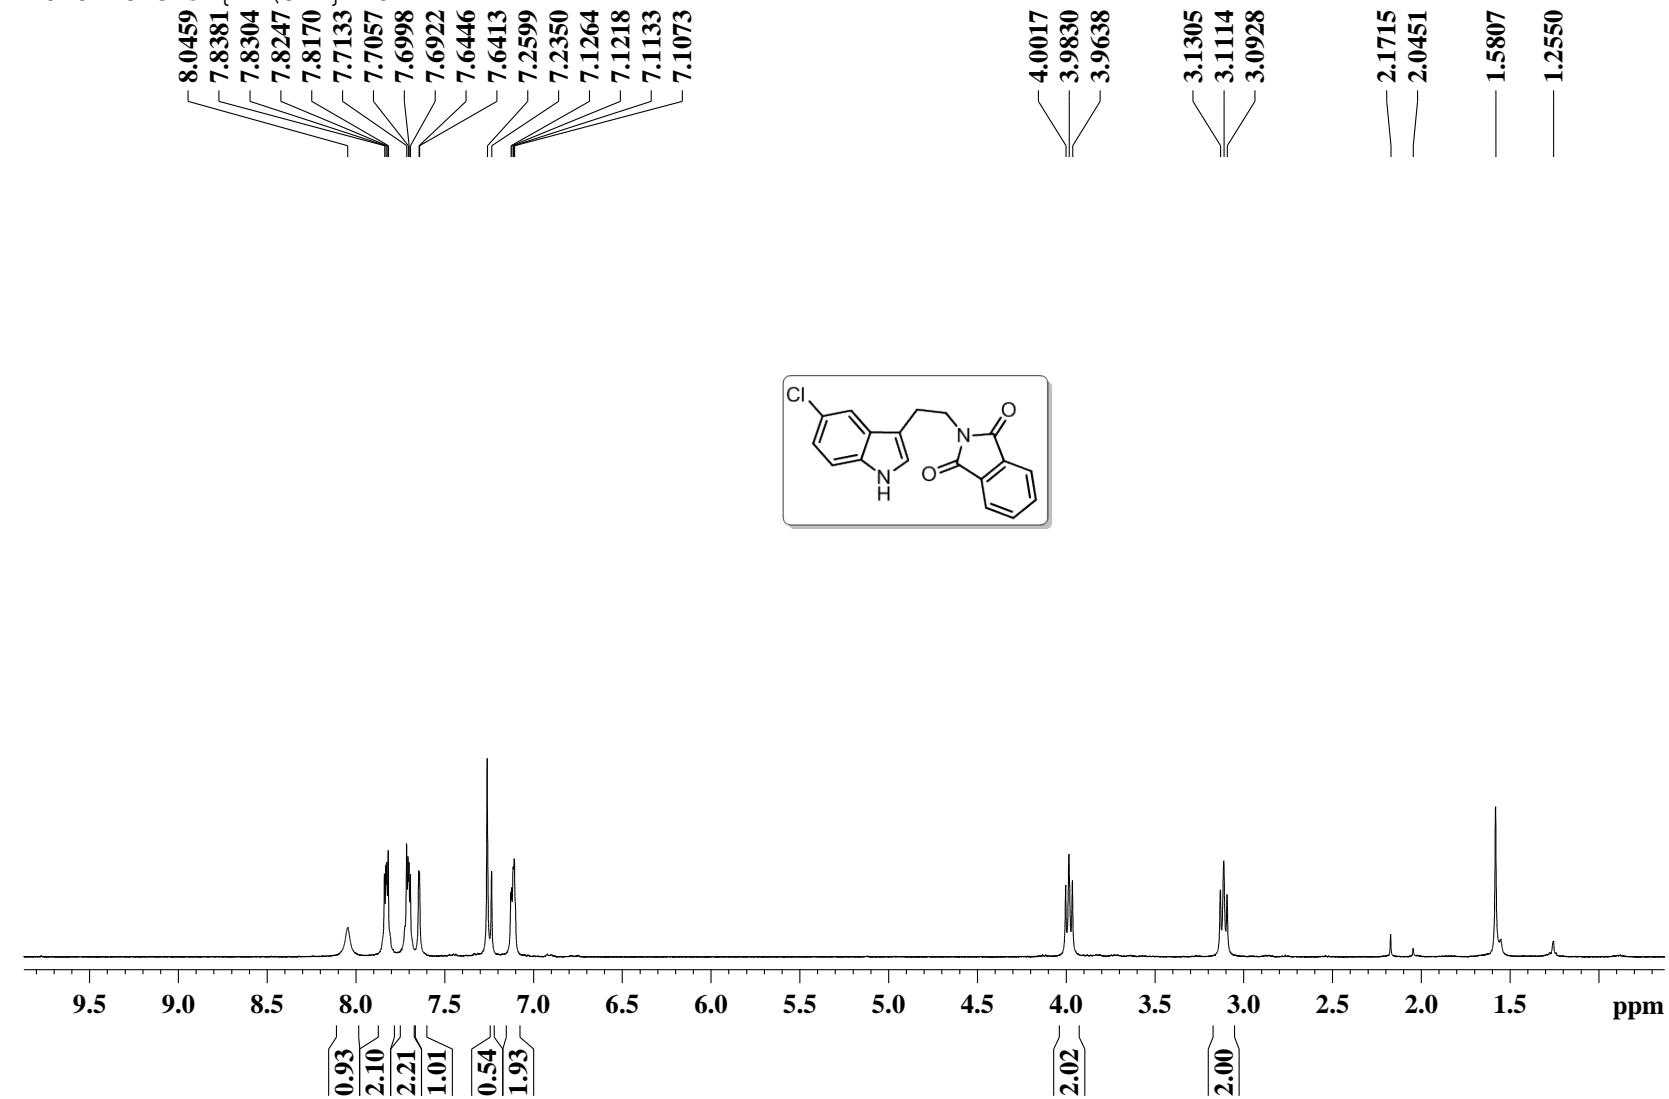



C13CPD CDC13 {D:\CRR} KOPAL 1

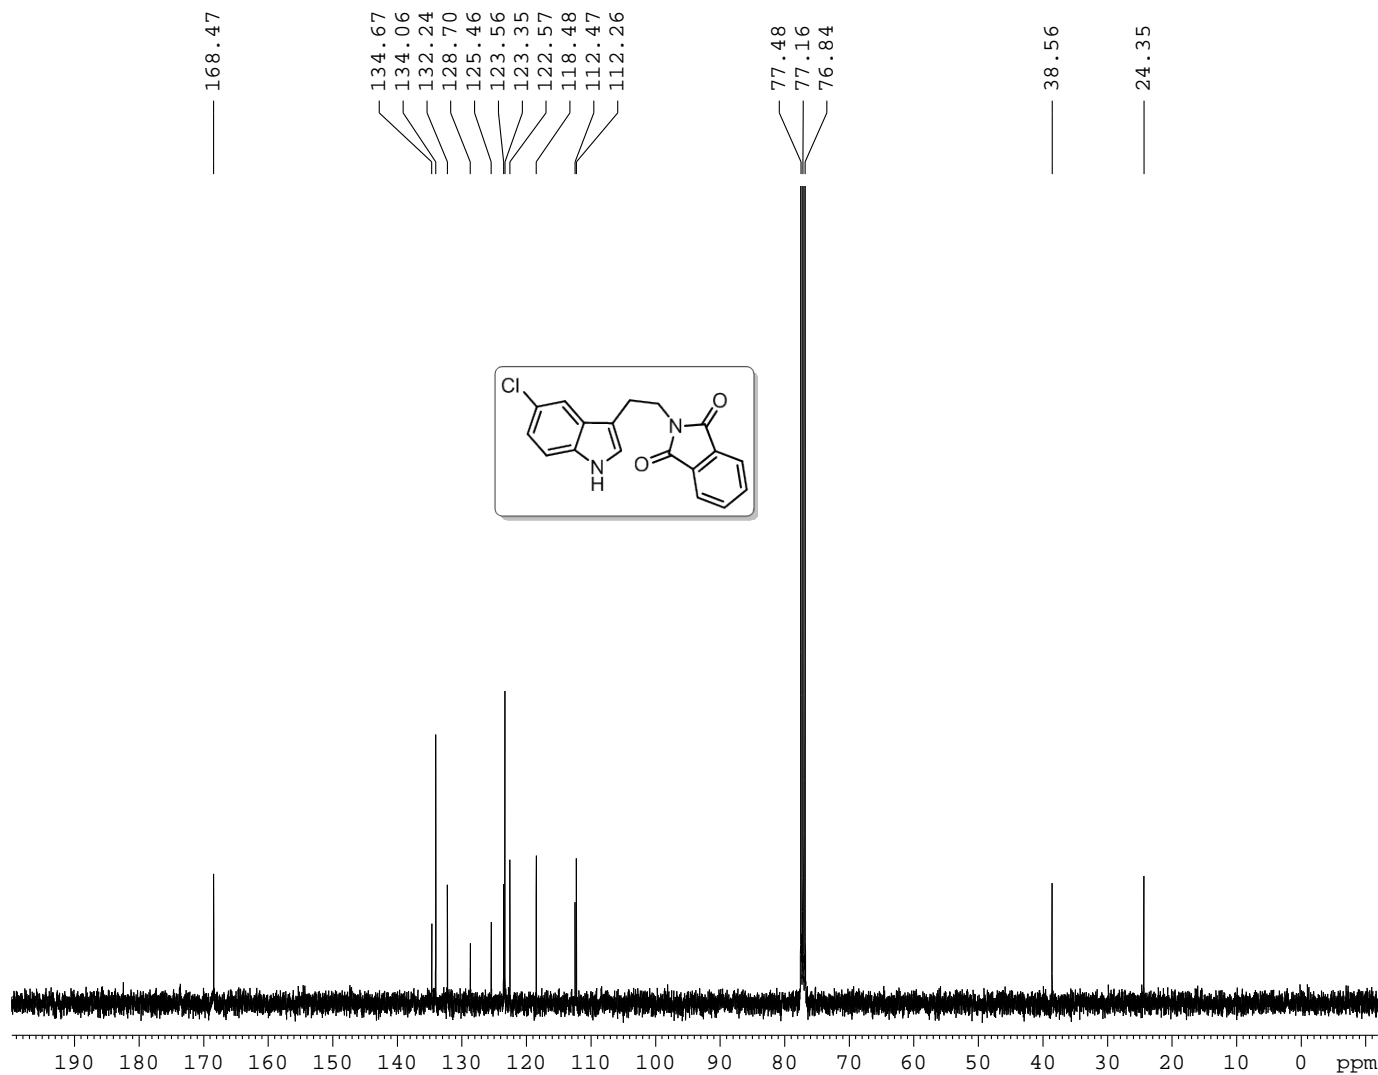

Current Data Parameters  
NAME SMR-CHLORO  
EXPNO 1  
PROCNO 1

F2 - Acquisition Parameters  
Date\_ 20111208  
Time 11.28  
INSTRUM spect  
PROBHD 5 mm BBO BB-1H  
PULPROG zgpg30  
TD 65536  
SOLVENT CDC13  
NS 256  
DS 4  
SWH 24038.461 Hz  
FIDRES 0.366798 Hz  
AQ 1.3631988 sec  
RG 1290  
DW 20.800 usec  
DE 6.00 usec  
TE 298.1 K  
D1 2.00000000 sec  
d11 0.03000000 sec  
DELTA 1.89999998 sec  
TD0 1

==== CHANNEL f1 =====  
NUC1 13C  
P1 9.50 usec  
PL1 -0.60 dB  
SFO1 100.6228298 MHz

==== CHANNEL f2 =====  
CPDPRG2 waltz16  
NUC2 1H  
PCPD2 90.00 usec  
PL12 15.60 dB  
PL13 15.60 dB  
PL2 -0.90 dB  
SFO2 400.1316005 MHz

F2 - Processing parameters  
SI 32768  
SF 100.6127543 MHz  
WDW EM  
SSB 0  
LB 1.00 Hz  
GB 0  
PC 1.40

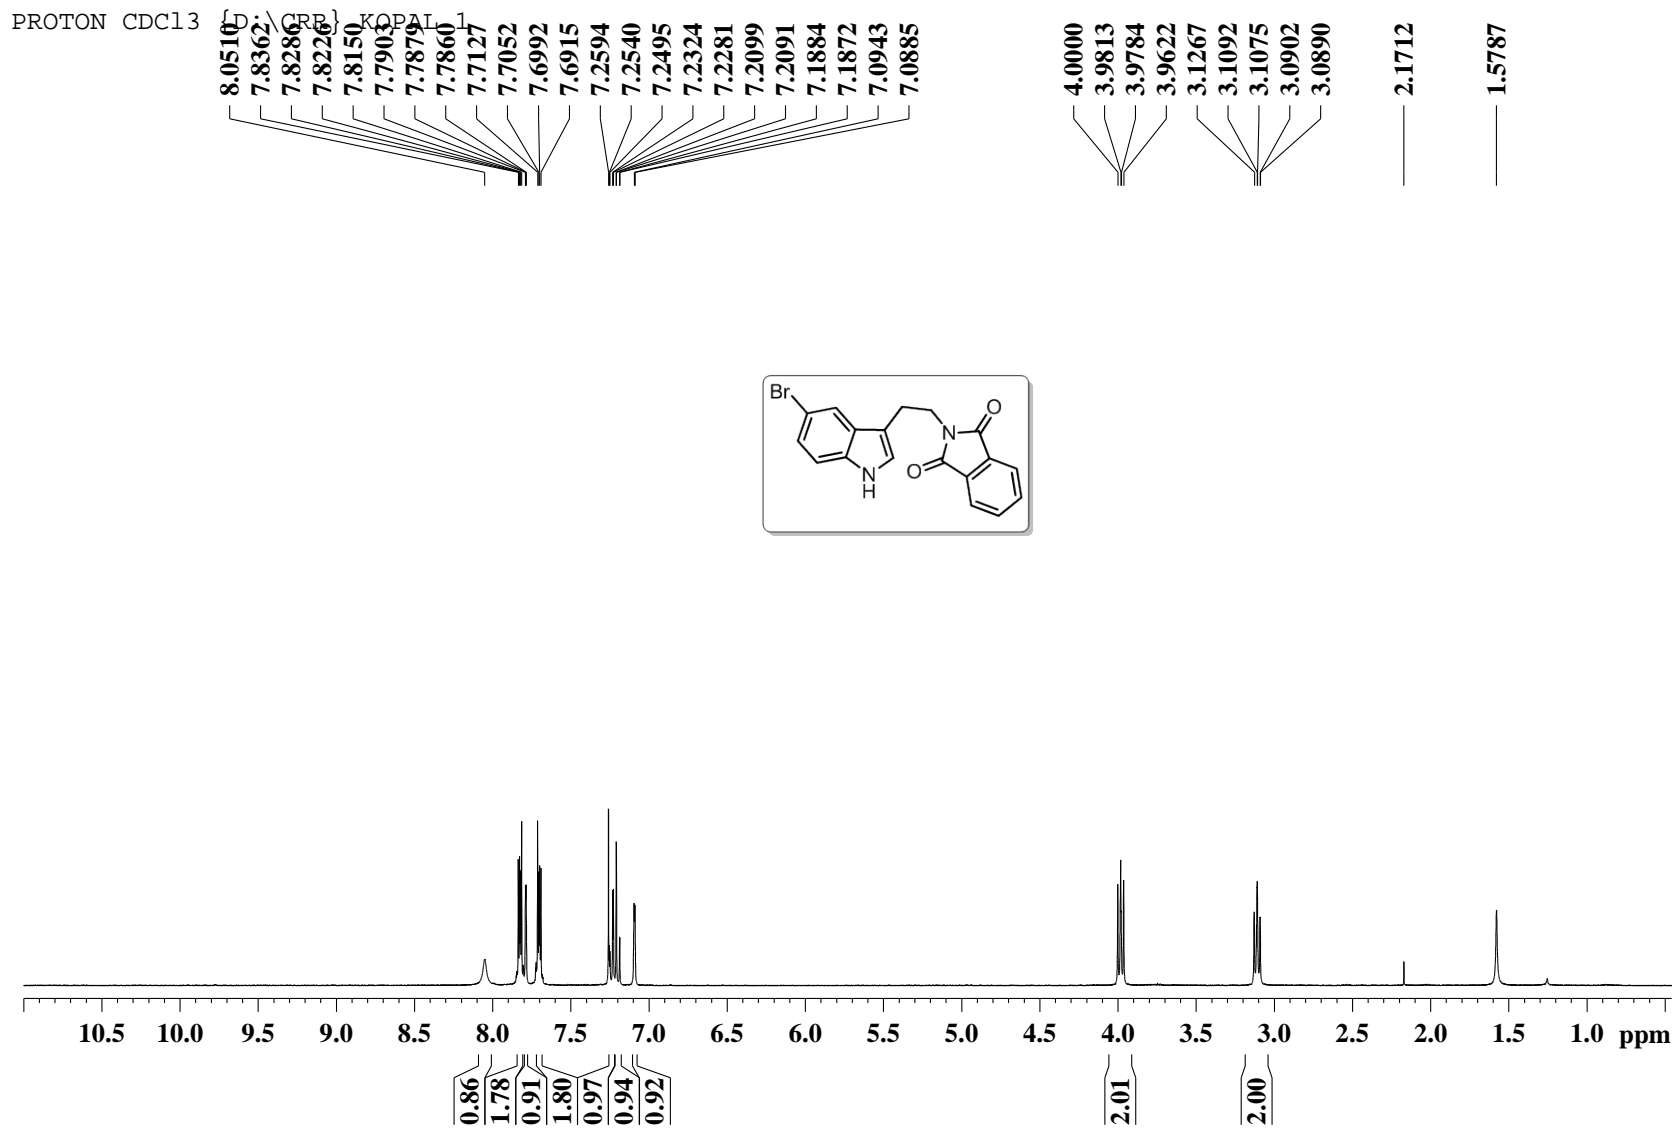

C13CPD DMSO {D:\CRR} KOPAL 1

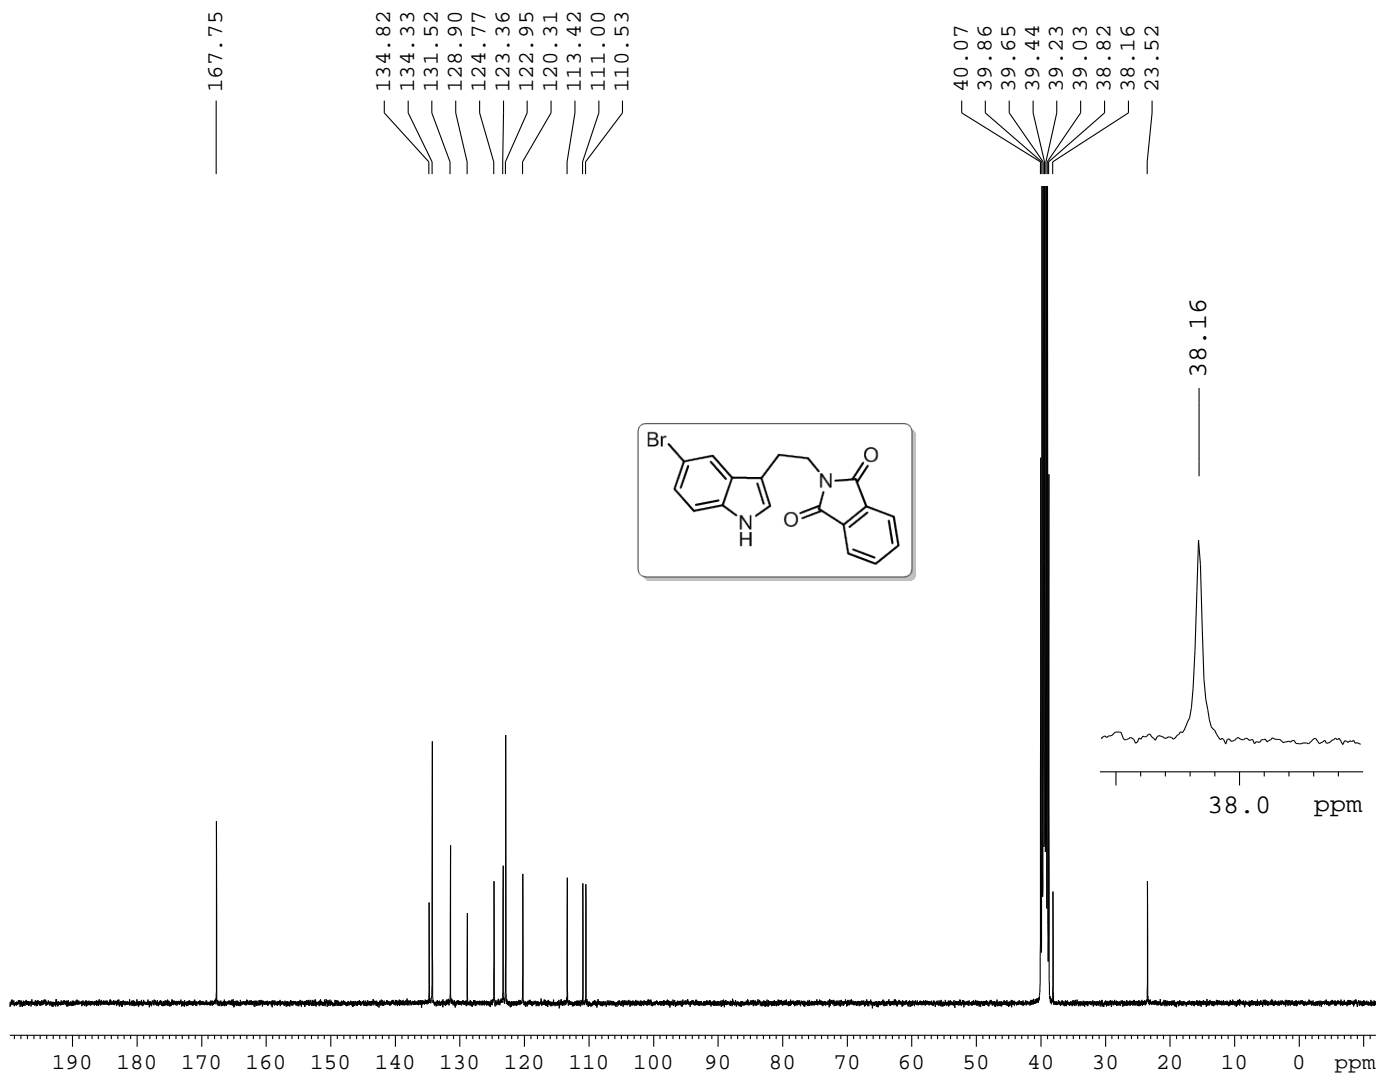

Current Data Parameters  
NAME SMR-con-G  
EXPNO 1  
PROCNO 1

F2 - Acquisition Parameters  
Date\_ 20120225  
Time 9.15  
INSTRUM spect  
PROBHD 5 mm BBO BB-1H  
PULPROG zgpg30  
TD 65536  
SOLVENT DMSO  
NS 18000  
DS 4  
SWH 24038.461 Hz  
FIDRES 0.366798 Hz  
AQ 1.3631988 sec  
RG 50.8  
DW 20.800 usec  
DE 6.00 usec  
TE 292.3 K  
D1 2.00000000 sec  
d11 0.03000000 sec  
DELTA 1.89999998 sec  
TD0 1

=====  
CHANNEL f1  
NUC1 13C  
P1 9.50 usec  
PL1 -0.60 dB  
SFO1 100.6228298 MHz

=====  
CHANNEL f2  
CPDPRG2 waltz16  
NUC2 1H  
PCPD2 90.00 usec  
PL12 15.60 dB  
PL13 15.60 dB  
PL2 -0.90 dB  
SFO2 400.1316005 MHz

F2 - Processing parameters  
SI 32768  
SF 100.6128193 MHz  
WDW EM  
SSB 0  
LB 1.00 Hz  
GB 0  
PC 1.40

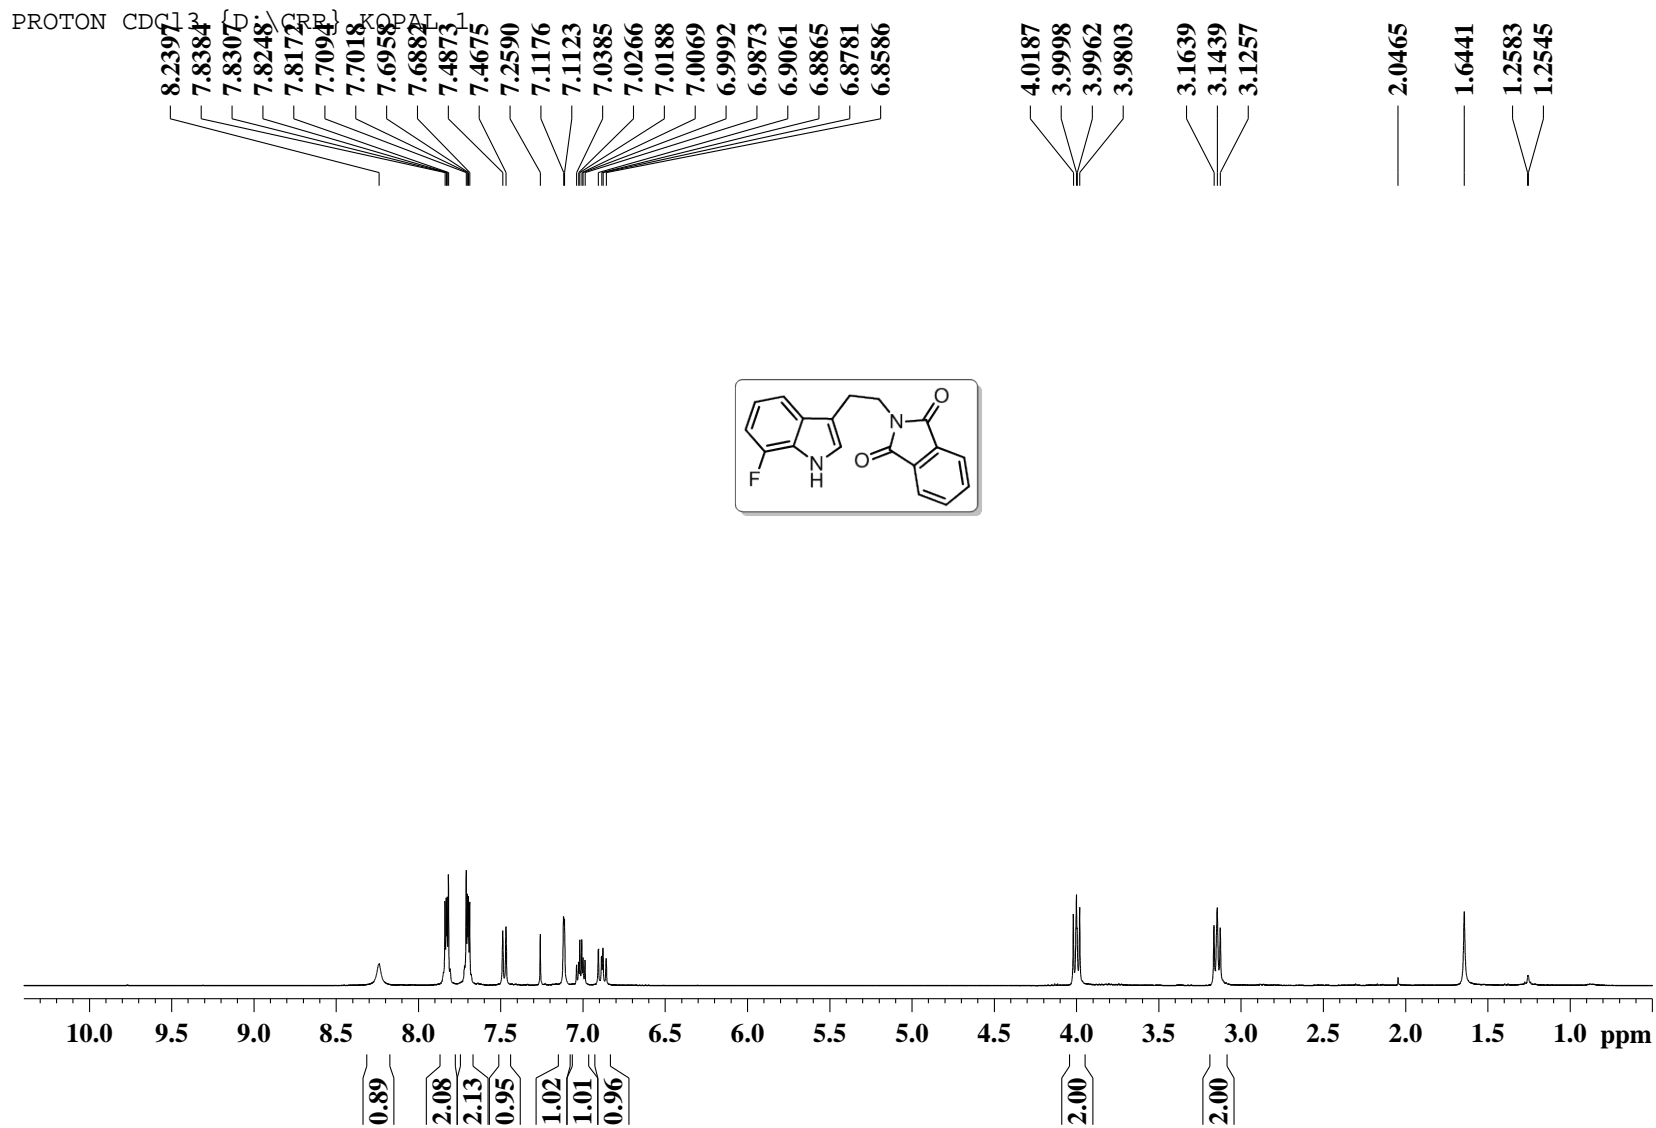

C13CPD CDC13 {D:\CRR} KOPAL 1

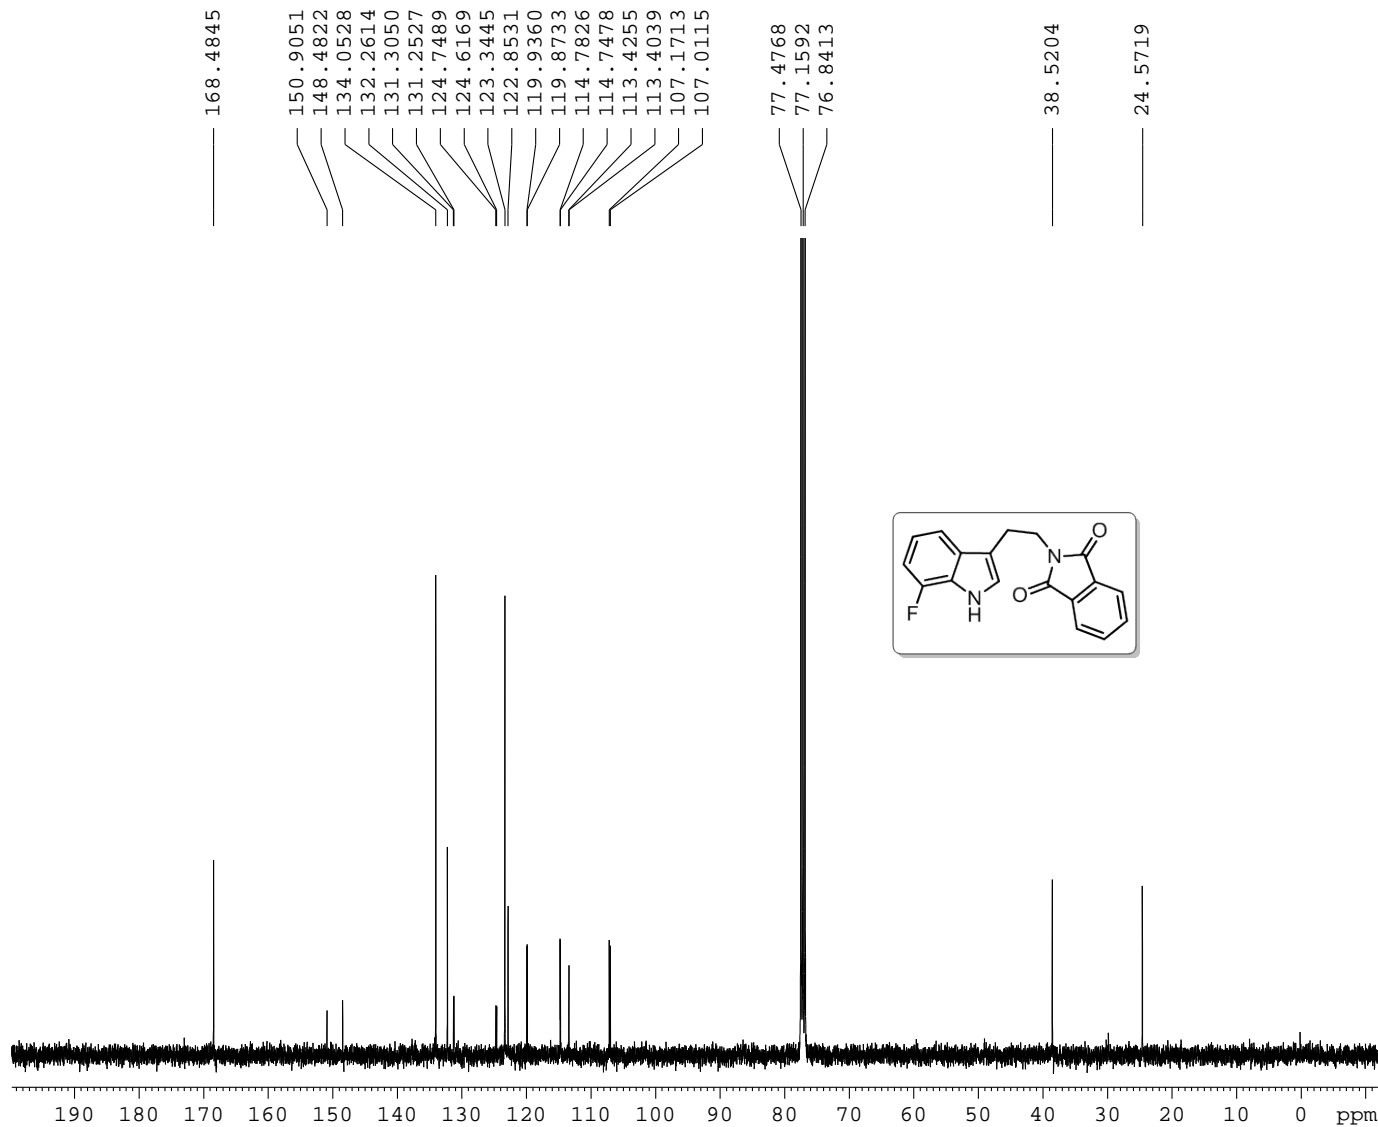

Current Data Parameters  
NAME SMR-con-B  
EXPNO 1  
PROCNO 1

F2 - Acquisition Parameters  
Date\_ 20120130  
Time 13.53  
INSTRUM spect  
PROBHD 5 mm BBO BB-1H  
PULPROG zgpg30  
TD 65536  
SOLVENT CDC13  
NS 1024  
DS 4  
SWH 24038.461 Hz  
FIDRES 0.366798 Hz  
AQ 1.3631988 sec  
RG 1030  
DW 20.800 usec  
DE 6.00 usec  
TE 295.9 K  
D1 2.00000000 sec  
d11 0.03000000 sec  
DELTA 1.89999998 sec  
TD0 1

==== CHANNEL f1 =====  
NUC1 13C  
P1 9.50 usec  
PL1 -0.60 dB  
SFO1 100.6228298 MHz

==== CHANNEL f2 =====  
CPDPRG2 waltz16  
NUC2 1H  
PCPD2 90.00 usec  
PL12 15.60 dB  
PL13 15.60 dB  
PL2 -0.90 dB  
SFO2 400.1316005 MHz

F2 - Processing parameters  
SI 32768  
SF 100.6127546 MHz  
WDW EM  
SSB 0  
LB 1.00 Hz  
GB 0  
PC 1.40

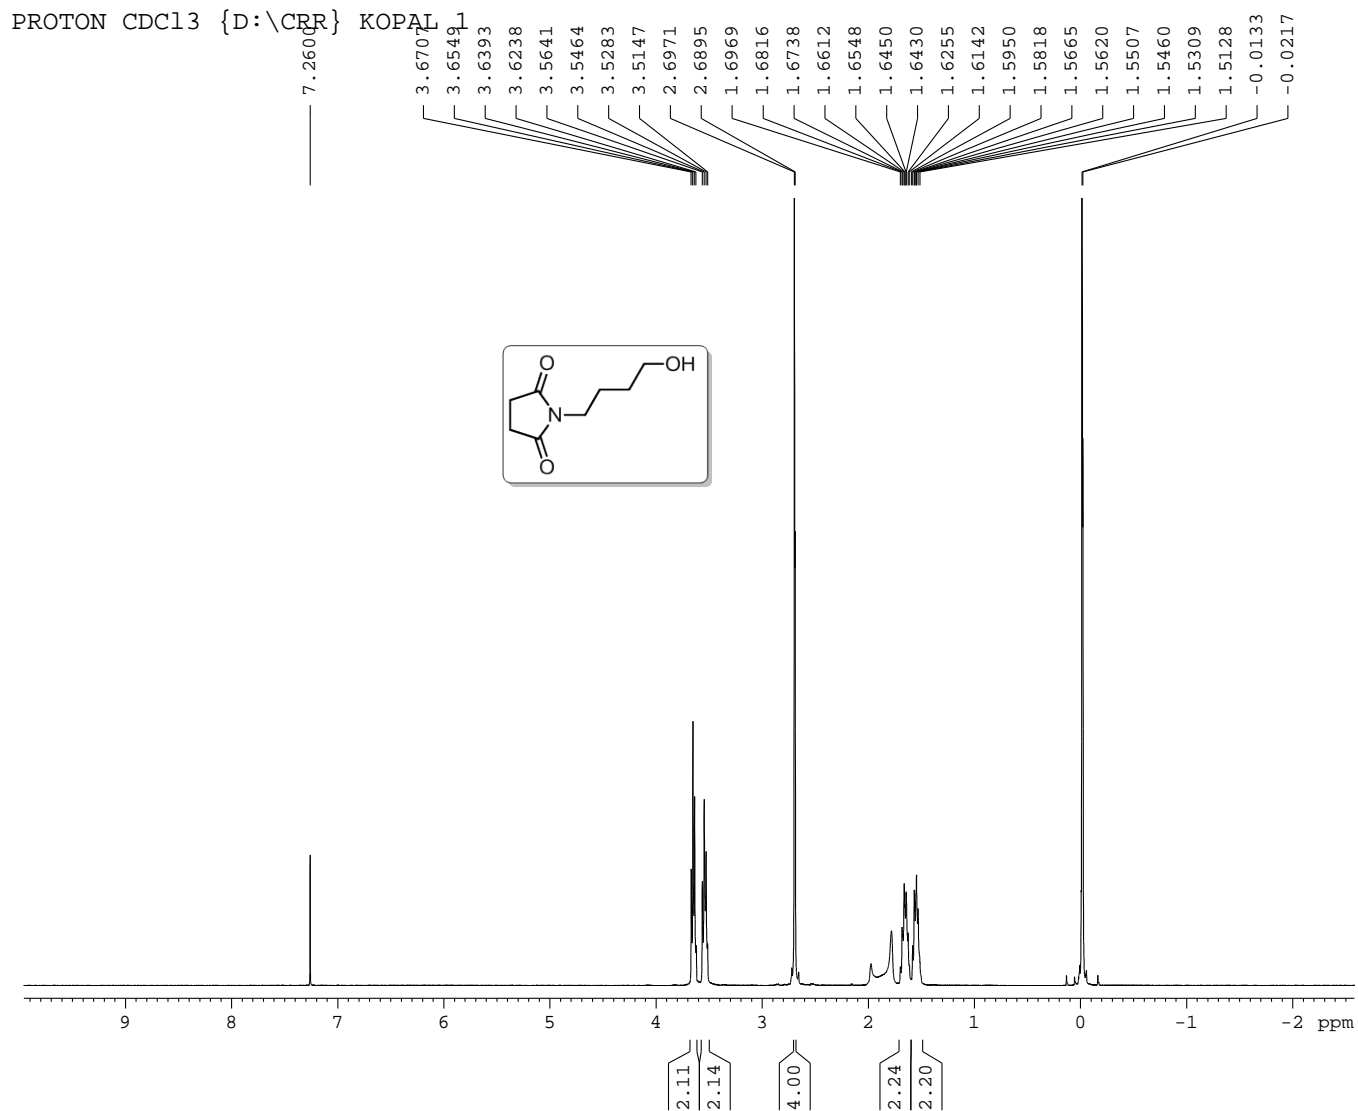

Current Data Parameters  
NAME SMR-I-230-1  
EXPNO 1  
PROCNO 1

F2 - Acquisition Parameters  
Date\_ 20110624  
Time 16.15  
INSTRUM spect  
PROBHD 5 mm BBO BB-1H  
PULPROG zg30  
TD 65536  
SOLVENT CDCl3  
NS 16  
DS 2  
SWH 8223.685 Hz  
FIDRES 0.125483 Hz  
AQ 3.9846387 sec  
RG 181  
DW 60.800 usec  
DE 6.00 usec  
TE 294.9 K  
D1 1.0000000 sec  
TD0 1

==== CHANNEL f1 =====  
NUC1 1H  
P1 14.00 usec  
PL1 -0.90 dB  
SFO1 400.1324710 MHz

F2 - Processing parameters  
SI 32768  
SF 400.1300039 MHz  
WDW EM  
SSB 0  
LB 0.30 Hz  
GB 0  
PC 1.00

C13CPD CDC13 {D:\CRR} KOPAL 1

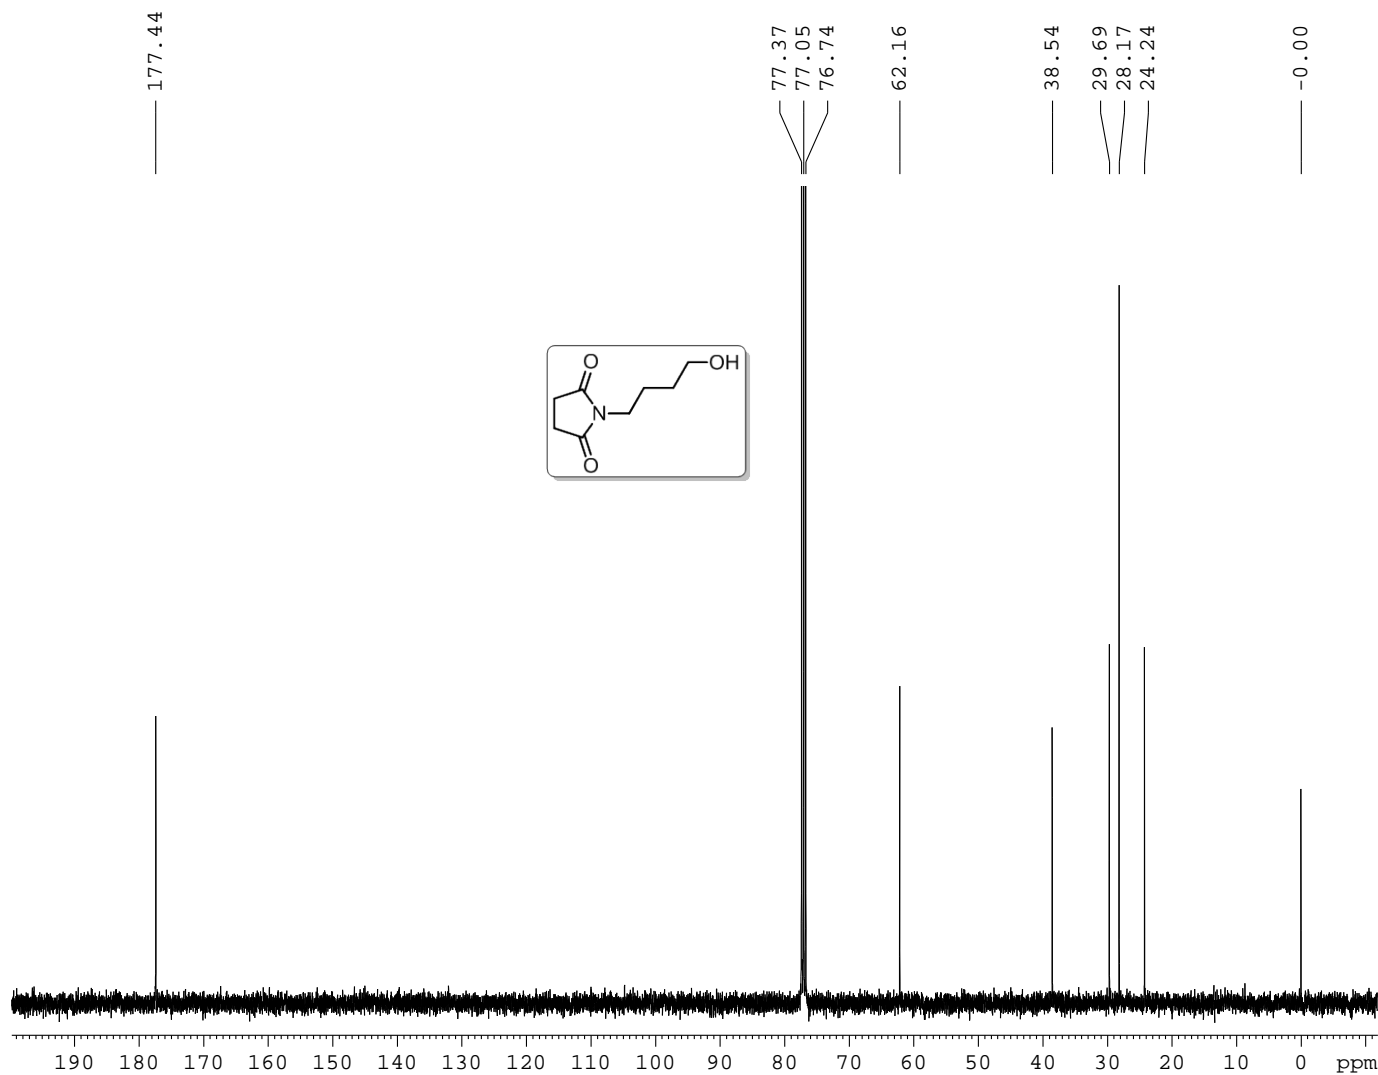

S55

Current Data Parameters  
NAME SMR-I-230-1  
EXPNO 2  
PROCNO 1

F2 - Acquisition Parameters  
Date\_ 20110713  
Time 14.00  
INSTRUM spect  
PROBHD 5 mm BBO BB-1H  
PULPROG zgpg30  
TD 65536  
SOLVENT CDC13  
NS 269  
DS 4  
SWH 24038.461 Hz  
FIDRES 0.366798 Hz  
AQ 1.3631988 sec  
RG 50.8  
DW 20.800 usec  
DE 6.00 usec  
TE 295.5 K  
D1 2.00000000 sec  
d11 0.03000000 sec  
DELTA 1.899999998 sec  
TD0 1

==== CHANNEL f1 =====  
NUC1 13C  
P1 9.50 usec  
PL1 -0.60 dB  
SFO1 100.6228298 MHz

==== CHANNEL f2 =====  
CPDPRG2 waltz16  
NUC2 1H  
PCPD2 90.00 usec  
PL12 15.60 dB  
PL13 15.60 dB  
PL2 -0.90 dB  
SFO2 400.1316005 MHz

F2 - Processing parameters  
SI 32768  
SF 100.6127664 MHz  
WDW EM  
SSB 0  
LB 1.00 Hz  
GB 0  
PC 1.40

PROTON CDC13 {D:\CRR} KOPAL 1

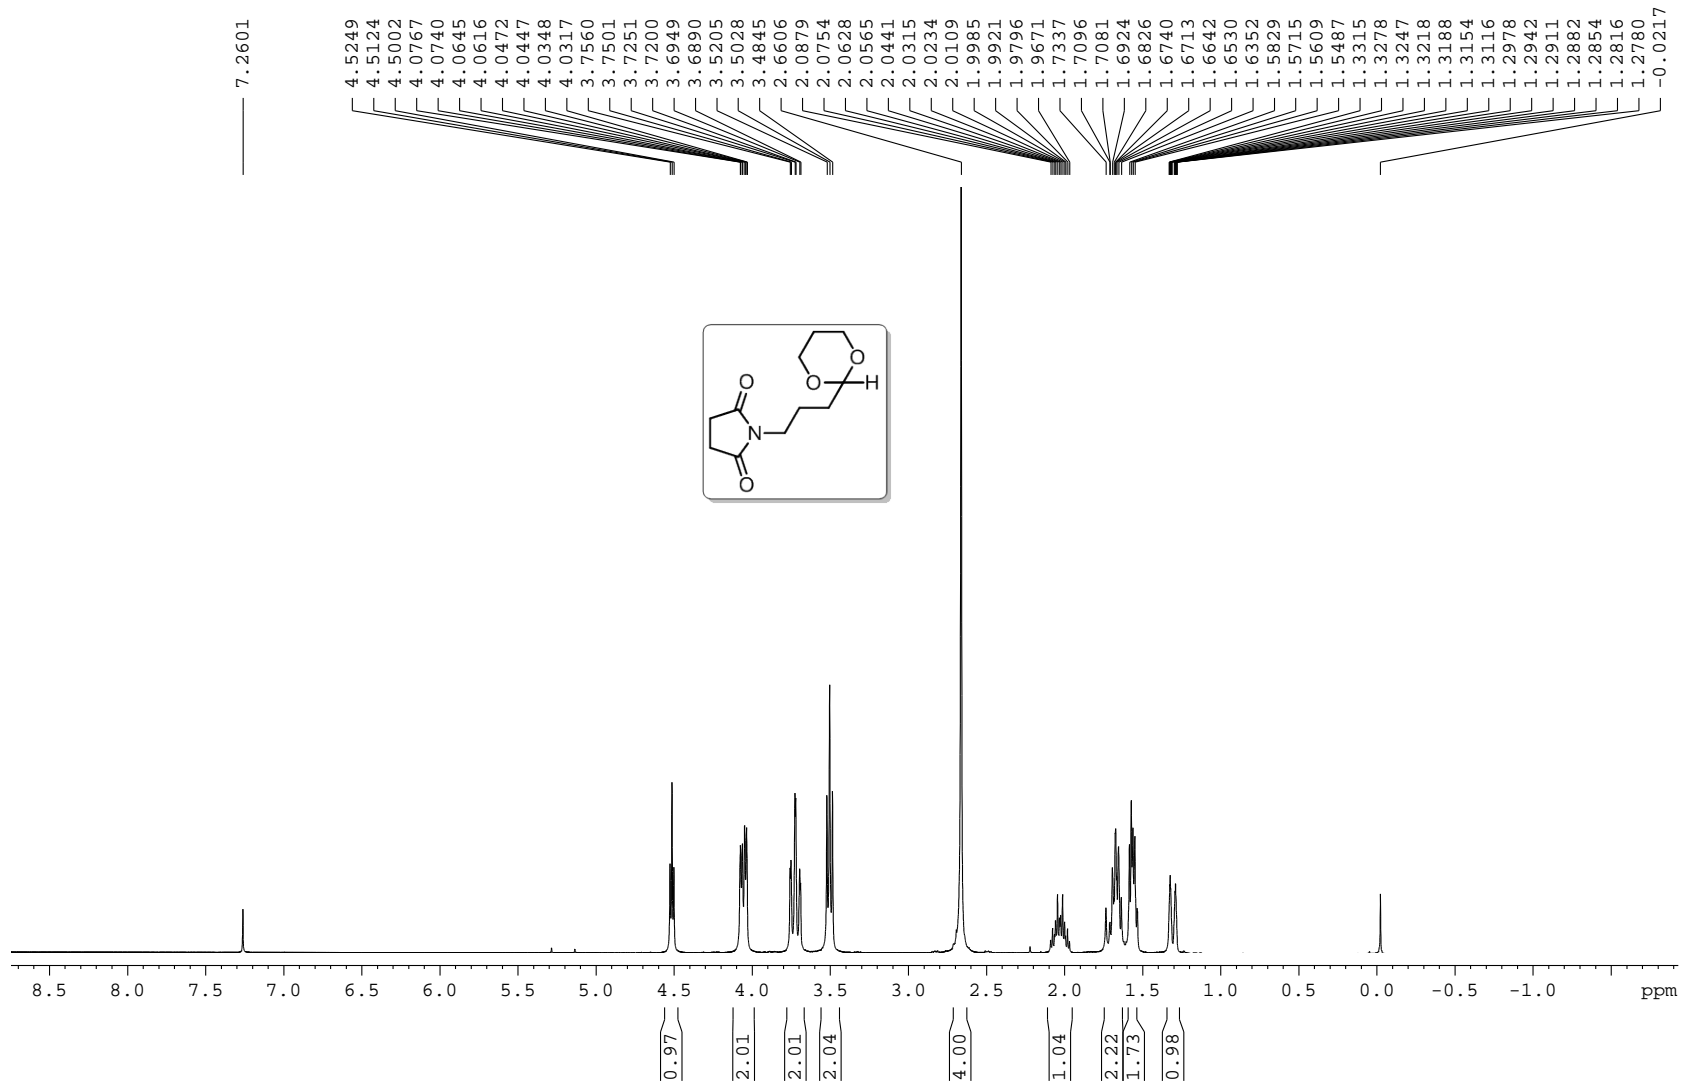



C13CPD CDC13 {D:\CRR} KOPAL 1

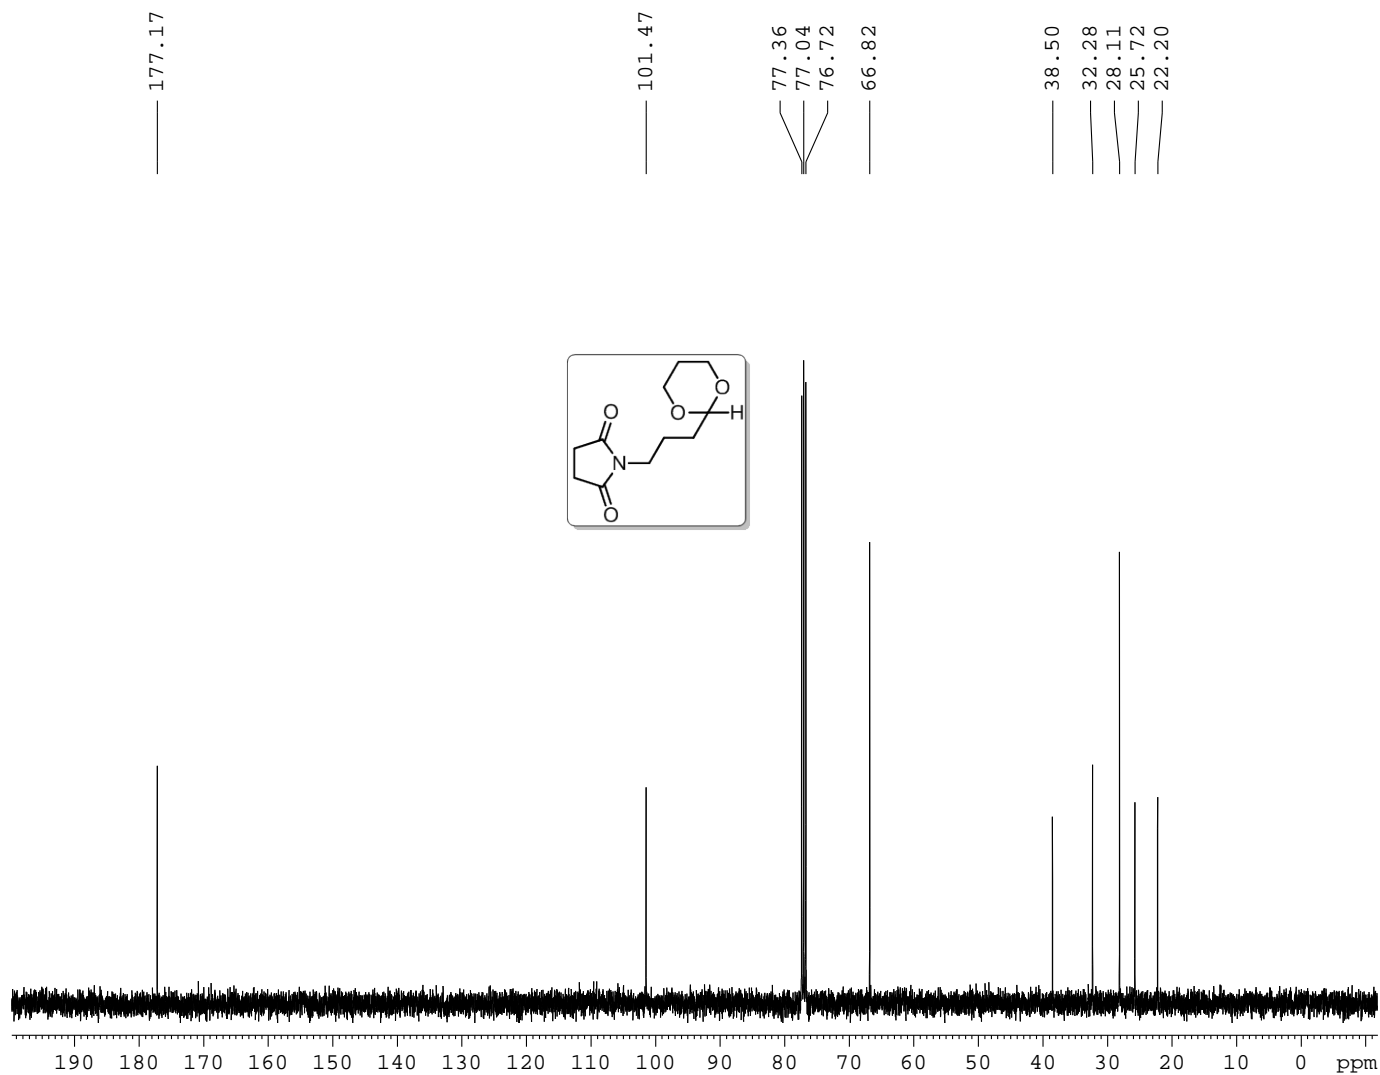

Current Data Parameters  
NAME SMR-I-185-1  
EXPNO 2  
PROCNO 1

F2 - Acquisition Parameters  
Date\_ 20110310  
Time 10.39  
INSTRUM spect  
PROBHD 5 mm BBO BB-1H  
PULPROG zgpg30  
TD 65536  
SOLVENT CDC13  
NS 57  
DS 4  
SWH 24038.461 Hz  
FIDRES 0.366798 Hz  
AQ 1.3631988 sec  
RG 1290  
DW 20.800 usec  
DE 6.00 usec  
TE 295.7 K  
D1 2.00000000 sec  
d11 0.03000000 sec  
DELTA 1.89999998 sec  
TD0 1

==== CHANNEL f1 =====  
NUC1 13C  
P1 9.50 usec  
PL1 -0.60 dB  
SFO1 100.6228298 MHz

==== CHANNEL f2 =====  
CPDPRG2 waltz16  
NUC2 1H  
PCPD2 90.00 usec  
PL12 15.60 dB  
PL13 15.60 dB  
PL2 -0.90 dB  
SFO2 400.1316005 MHz

F2 - Processing parameters  
SI 32768  
SF 100.6127690 MHz  
WDW EM  
SSB 0  
LB 1.00 Hz  
GB 0  
PC 1.40

S57

PROTON CDC13 {D:\CRR} KOPAL 1

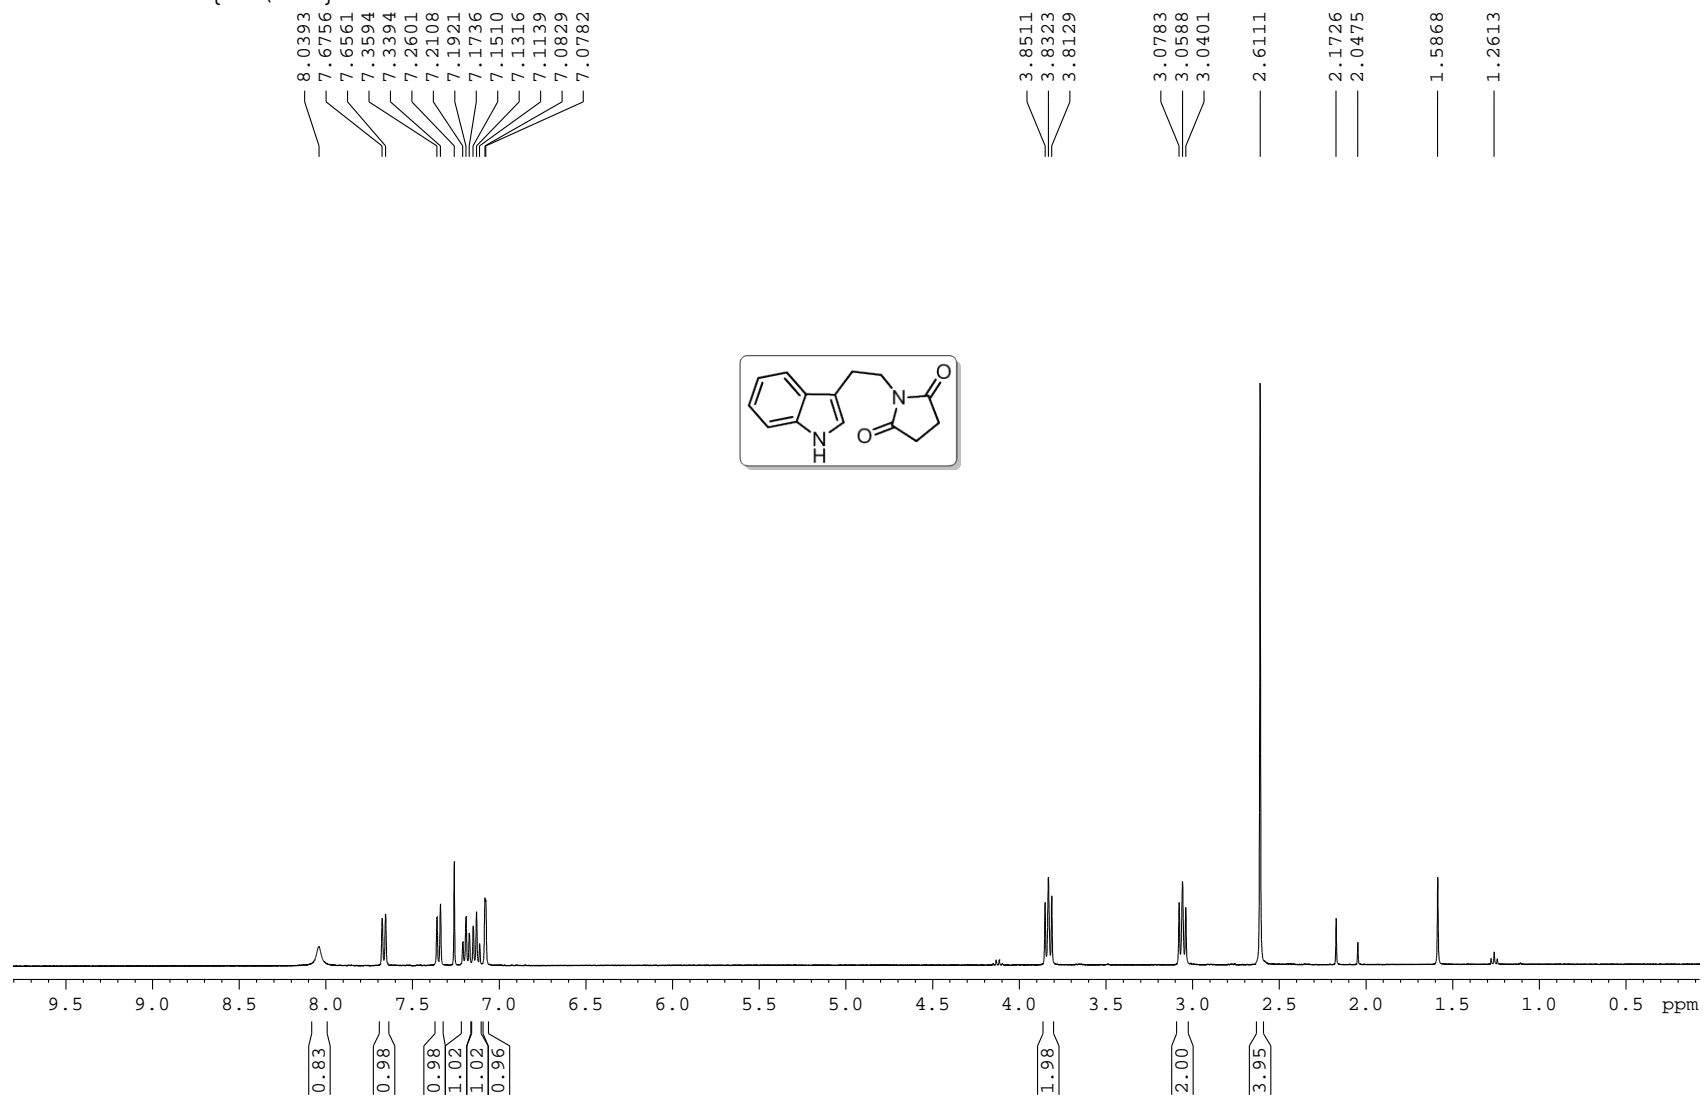

C13CPD CDC13 {D:\CRR} KOPAL 1

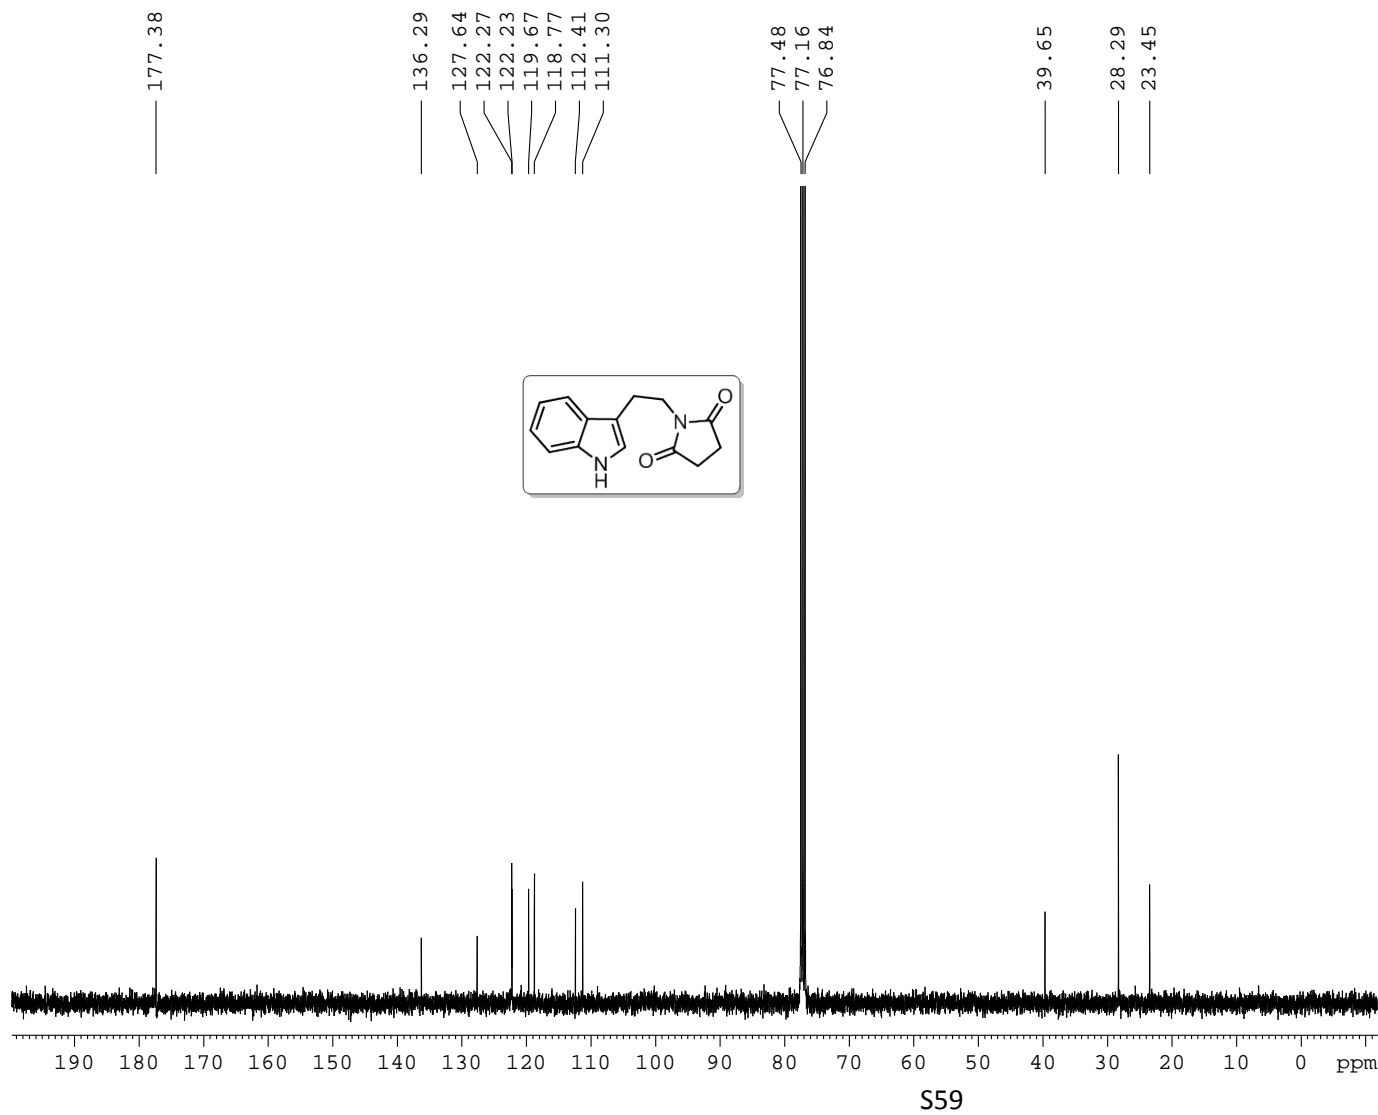

Current Data Parameters  
NAME SMR-CUI  
EXPNO 2  
PROCNO 1

F2 - Acquisition Parameters  
Date\_ 20111220  
Time 16.16  
INSTRUM spect  
PROBHD 5 mm BBO BB-1H  
PULPROG zgpg30  
TD 65536  
SOLVENT CDC13  
NS 512  
DS 4  
SWH 24038.461 Hz  
FIDRES 0.366798 Hz  
AQ 1.3631988 sec  
RG 1290  
DW 20.800 usec  
DE 6.00 usec  
TE 296.9 K  
D1 2.00000000 sec  
d11 0.03000000 sec  
DELTA 1.899999998 sec  
TD0 1

==== CHANNEL f1 =====  
NUC1 13C  
P1 9.50 usec  
PL1 -0.60 dB  
SFO1 100.6228298 MHz

==== CHANNEL f2 =====  
CPDPRG2 waltz16  
NUC2 1H  
PCPD2 90.00 usec  
PL12 15.60 dB  
PL13 15.60 dB  
PL2 -0.90 dB  
SFO2 400.1316005 MHz

F2 - Processing parameters  
SI 32768  
SF 100.6127538 MHz  
WDW EM  
SSB 0  
LB 1.00 Hz  
GB 0  
PC 1.40

PROTON CDC13 {D:\CRR} KOPAL 1

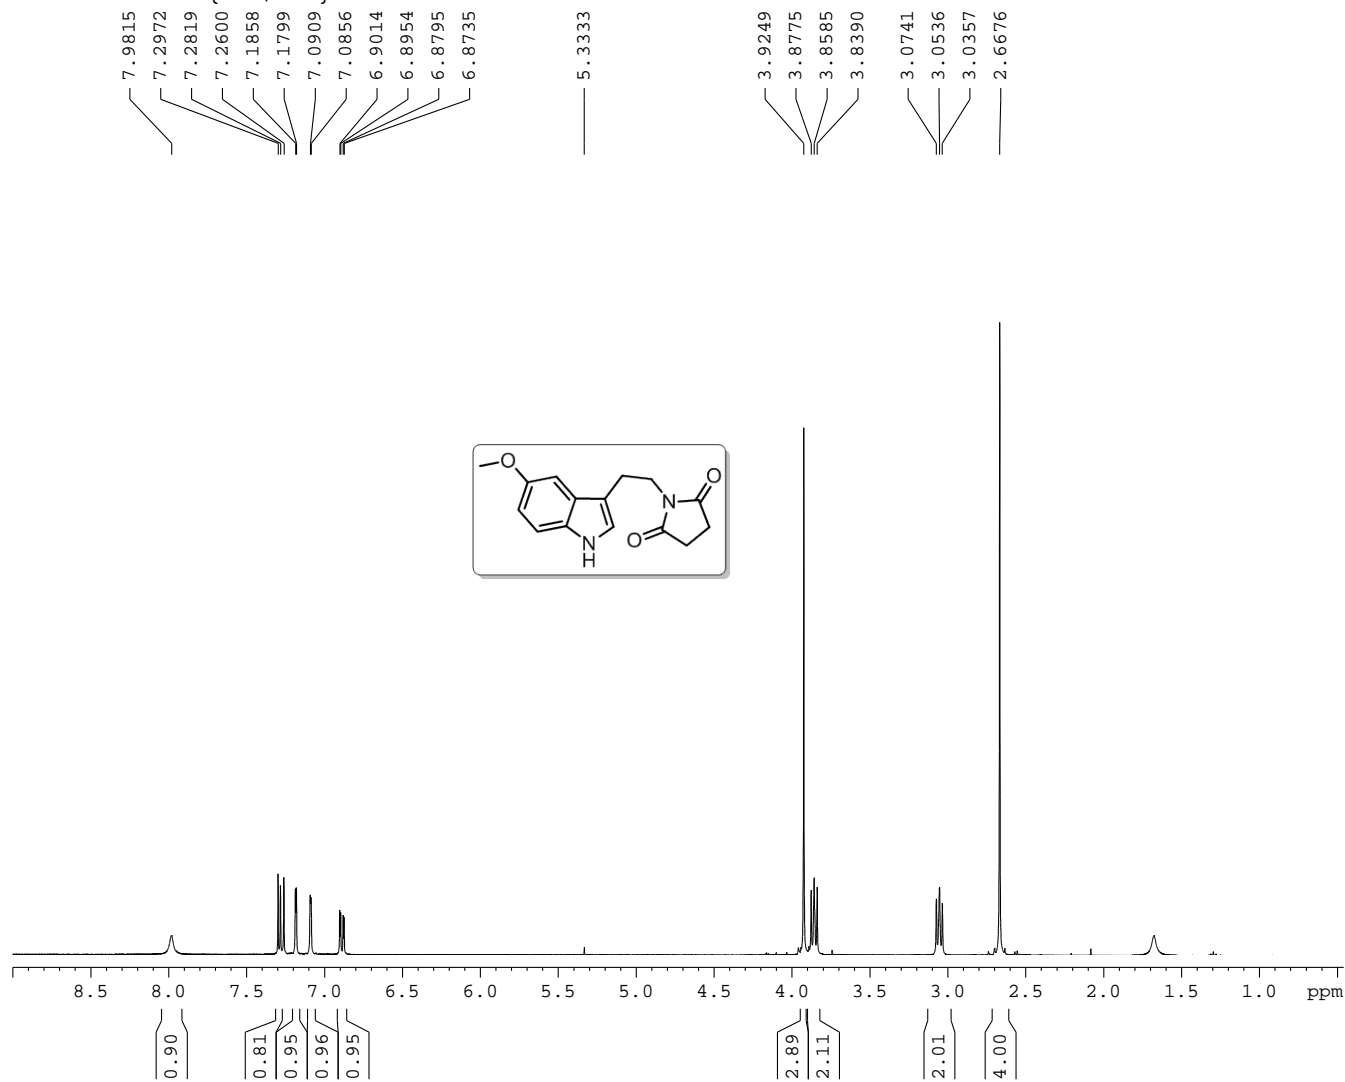

Current Data Parameters  
NAME SMR-I-235-2  
EXPNO 1  
PROCNO 1

F2 - Acquisition Parameters  
Date\_ 20110708  
Time 12.15  
INSTRUM spect  
PROBHD 5 mm BBO BB-1H  
PULPROG zg30  
TD 65536  
SOLVENT CDCl3  
NS 16  
DS 2  
SWH 8223.685 Hz  
FIDRES 0.125483 Hz  
AQ 3.9846387 sec  
RG 228  
DW 60.800 usec  
DE 6.00 usec  
TE 295.7 K  
D1 1.00000000 sec  
TD0 1

==== CHANNEL f1 =====  
NUC1 1H  
P1 14.00 usec  
PL1 -0.90 dB  
SFO1 400.1324710 MHz

F2 - Processing parameters  
SI 32768  
SF 400.1299888 MHz  
WDW EM  
SSB 0  
LB 0.30 Hz  
GB 0  
PC 1.00

C13CPD CDC13 {D:\CRR} KOPAL 1

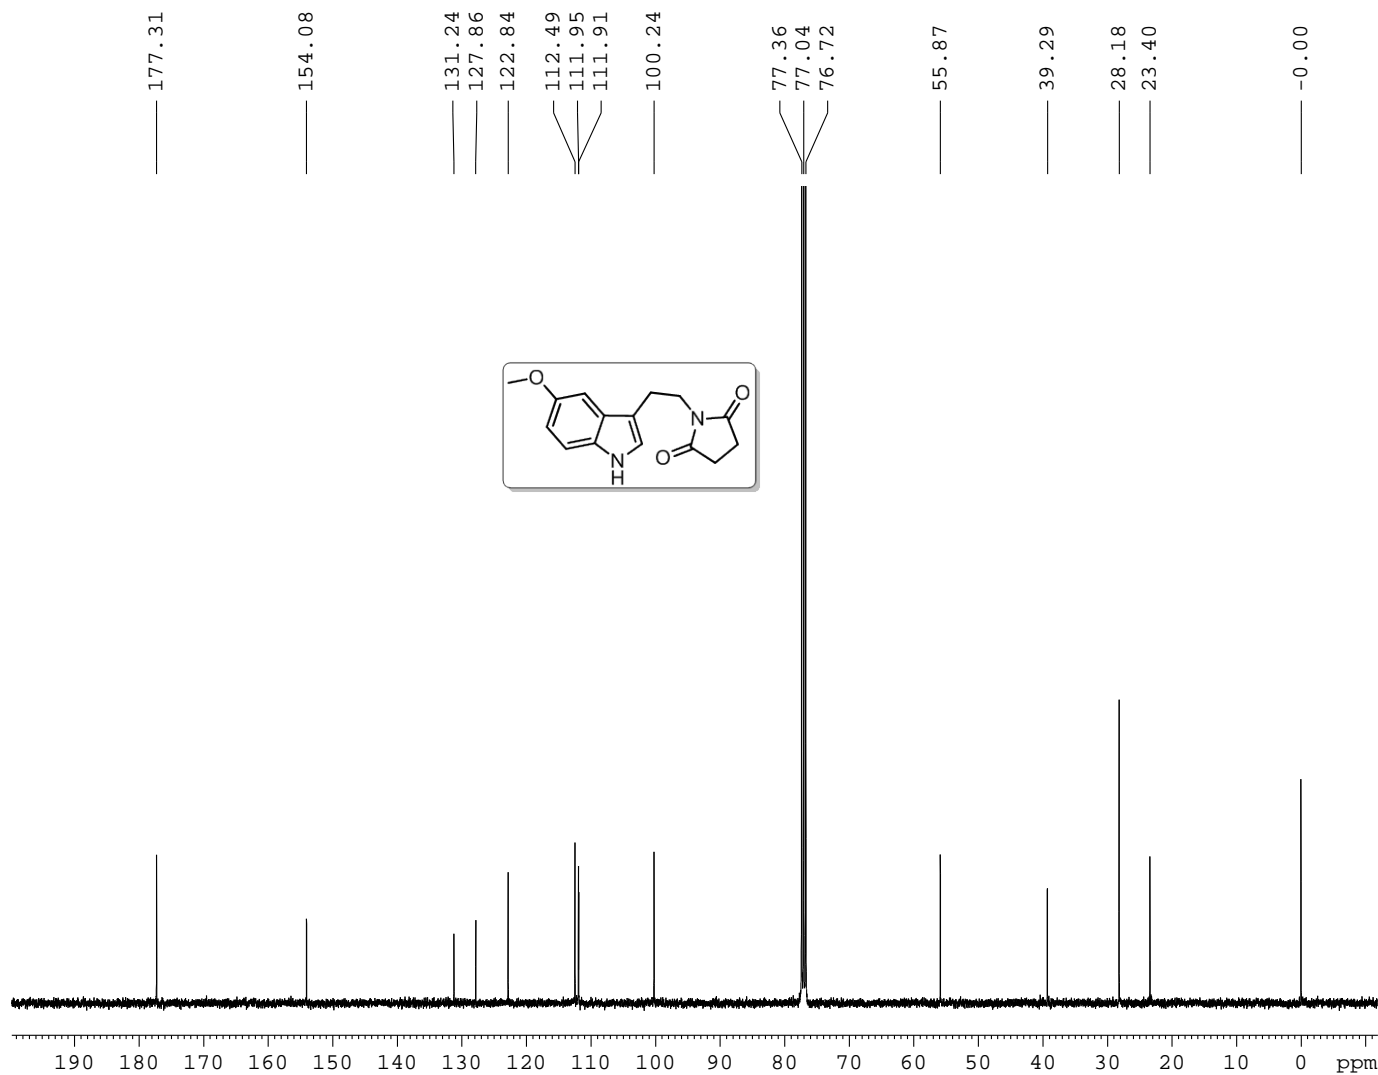

Current Data Parameters  
NAME SMR-I-235-2  
EXPNO 3  
PROCNO 1

F2 - Acquisition Parameters  
Date\_ 20110713  
Time 12.45  
INSTRUM spect  
PROBHD 5 mm BBO BB-1H  
PULPROG zgpg30  
TD 65536  
SOLVENT CDC13  
NS 1024  
DS 4  
SWH 24038.461 Hz  
FIDRES 0.366798 Hz  
AQ 1.3631988 sec  
RG 50.8  
DW 20.800 usec  
DE 6.00 usec  
TE 295.7 K  
D1 2.00000000 sec  
d11 0.03000000 sec  
DELTA 1.899999998 sec  
TD0 1

=====  
CHANNEL f1  
NUC1 13C  
P1 9.50 usec  
PL1 -0.60 dB  
SFO1 100.6228298 MHz

=====  
CHANNEL f2  
CPDPRG2 waltz16  
NUC2 1H  
PCPD2 90.00 usec  
PL12 15.60 dB  
PL13 15.60 dB  
PL2 -0.90 dB  
SFO2 400.1316005 MHz

F2 - Processing parameters  
SI 32768  
SF 100.6127685 MHz  
WDW EM  
SSB 0  
LB 1.00 Hz  
GB 0  
PC 1.40

S61

PROTON CDC13 {D:\CRR} KOPAL 1

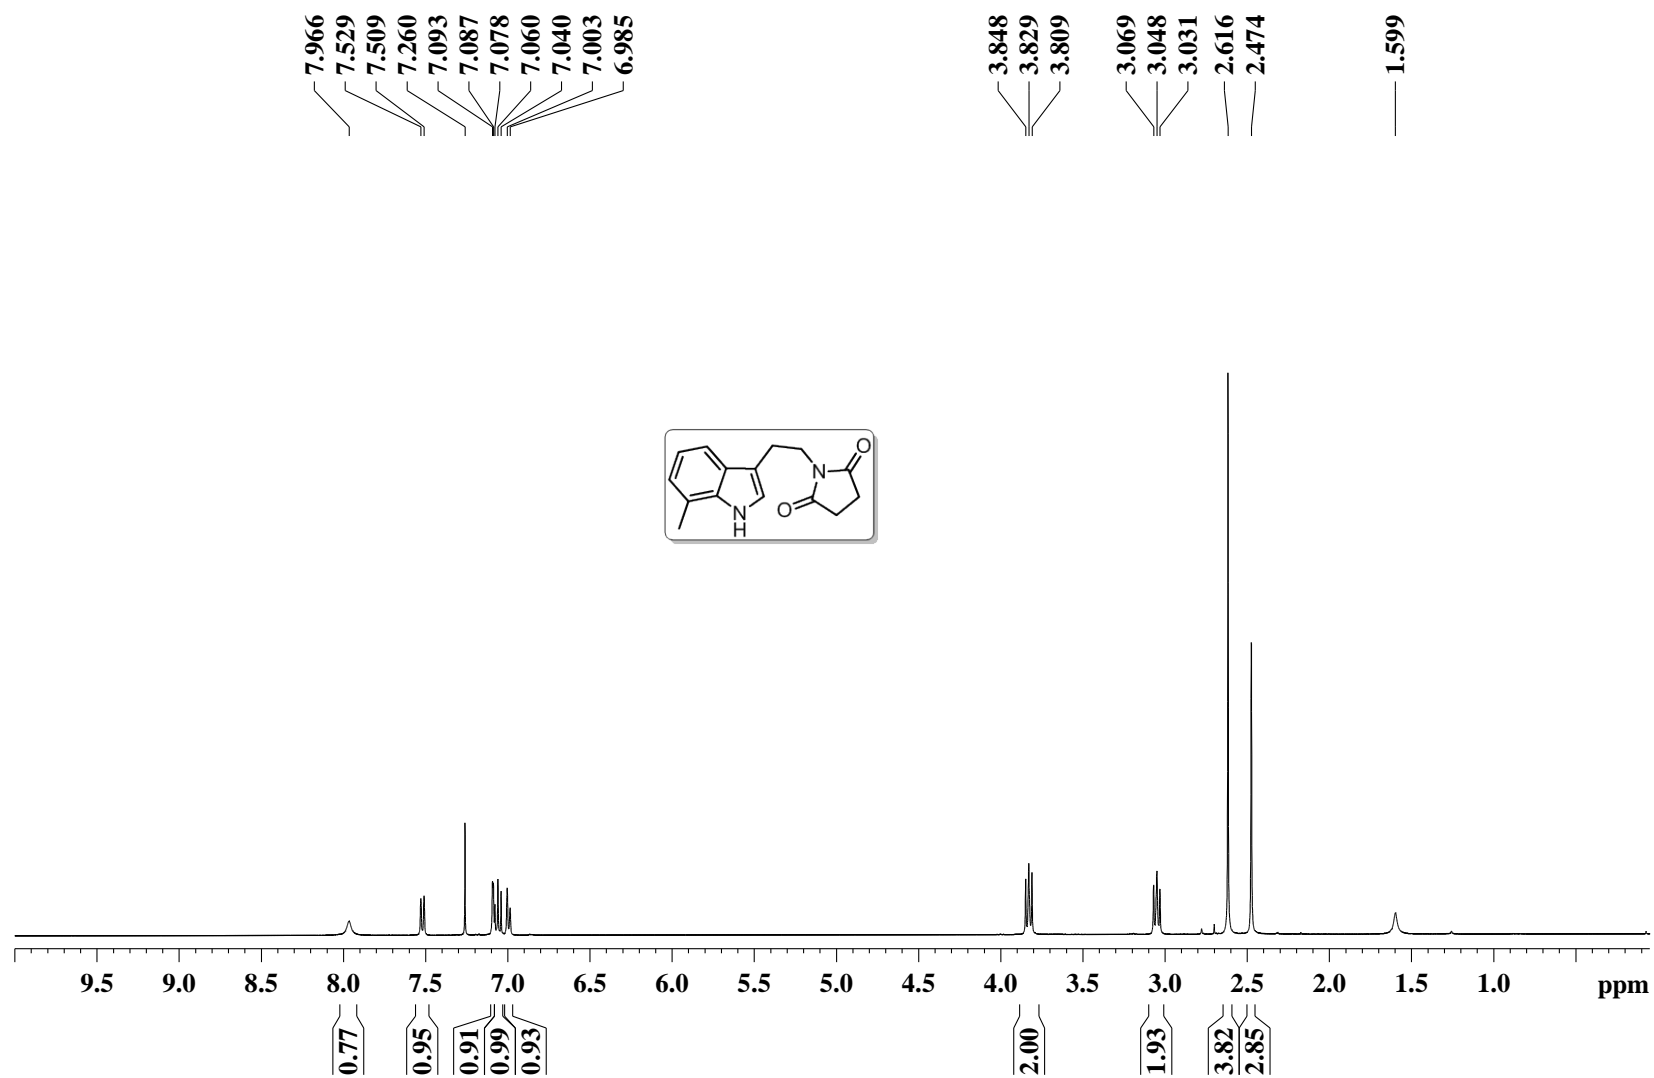

C13CPD CDC13 {D:\CRR} KOPAL 1

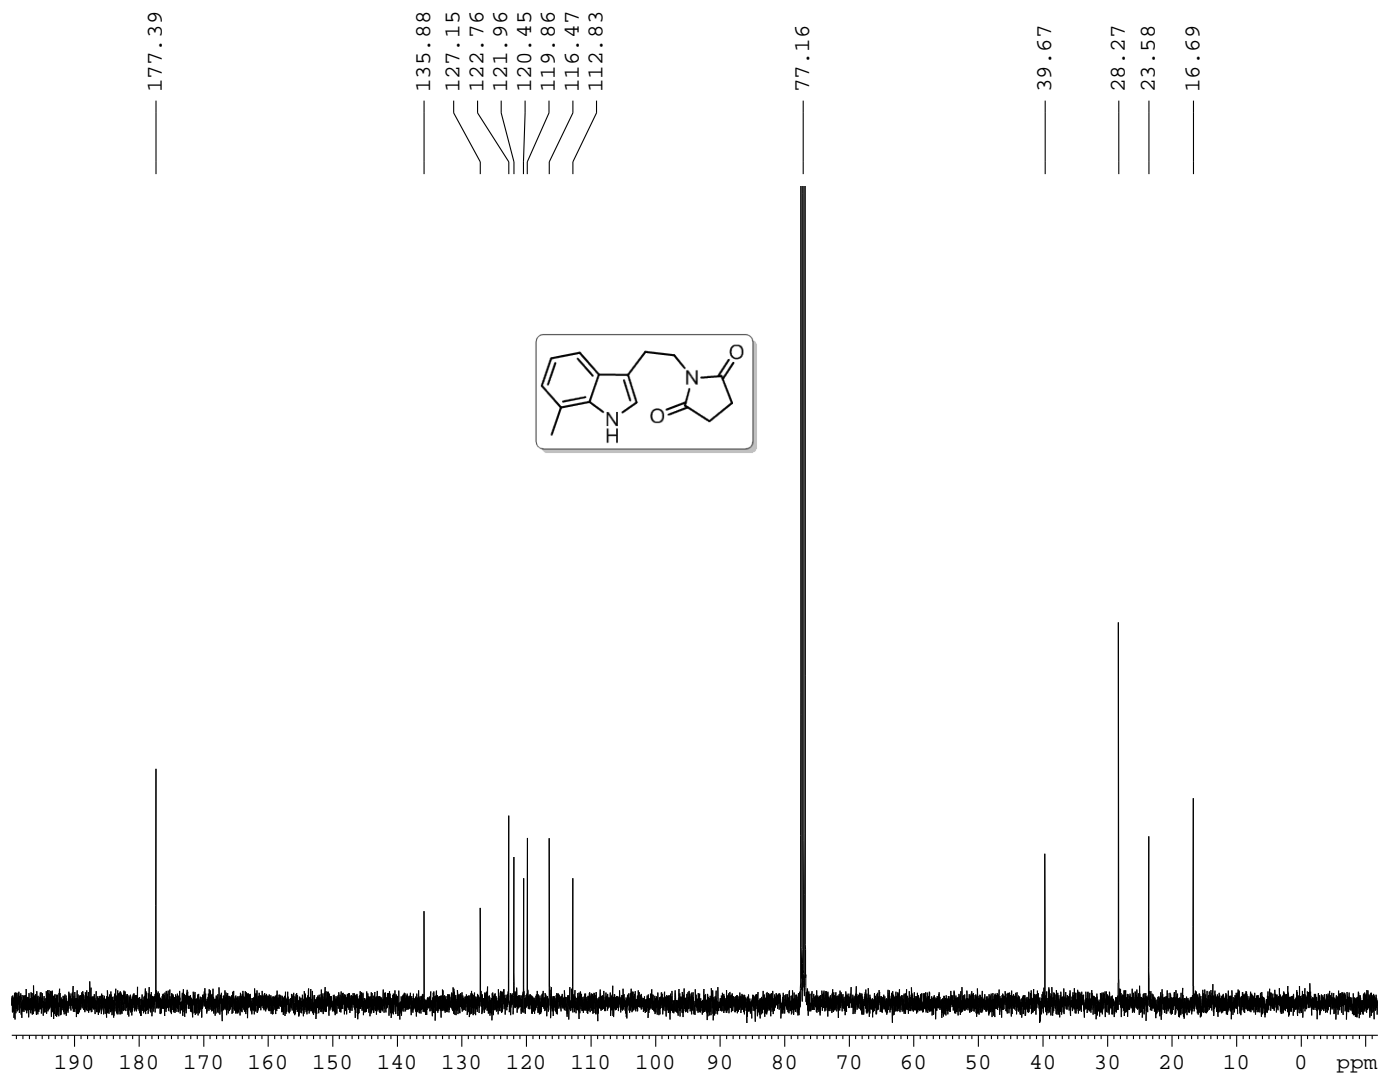

Current Data Parameters  
NAME SMR-I-100-10  
EXPNO 2  
PROCNO 1

F2 - Acquisition Parameters  
Date\_ 20110802  
Time 11.42  
INSTRUM spect  
PROBHD 5 mm BBO BB-1H  
PULPROG zgpg30  
TD 65536  
SOLVENT CDC13  
NS 175  
DS 4  
SWH 24038.461 Hz  
FIDRES 0.366798 Hz  
AQ 1.3631988 sec  
RG 50.8  
DW 20.800 usec  
DE 6.00 usec  
TE 297.5 K  
D1 2.00000000 sec  
d11 0.03000000 sec  
DELTA 1.89999998 sec  
TD0 1

==== CHANNEL f1 =====  
NUC1 13C  
P1 9.50 usec  
PL1 -0.60 dB  
SFO1 100.6228298 MHz

==== CHANNEL f2 =====  
CPDPRG2 waltz16  
NUC2 1H  
PCPD2 90.00 usec  
PL12 15.60 dB  
PL13 15.60 dB  
PL2 -0.90 dB  
SFO2 400.1316005 MHz

F2 - Processing parameters  
SI 32768  
SF 100.6127564 MHz  
WDW EM  
SSB 0  
LB 1.00 Hz  
GB 0  
PC 1.40

S63

PROTON CDC13 {D:\CRR} KOPAL 1

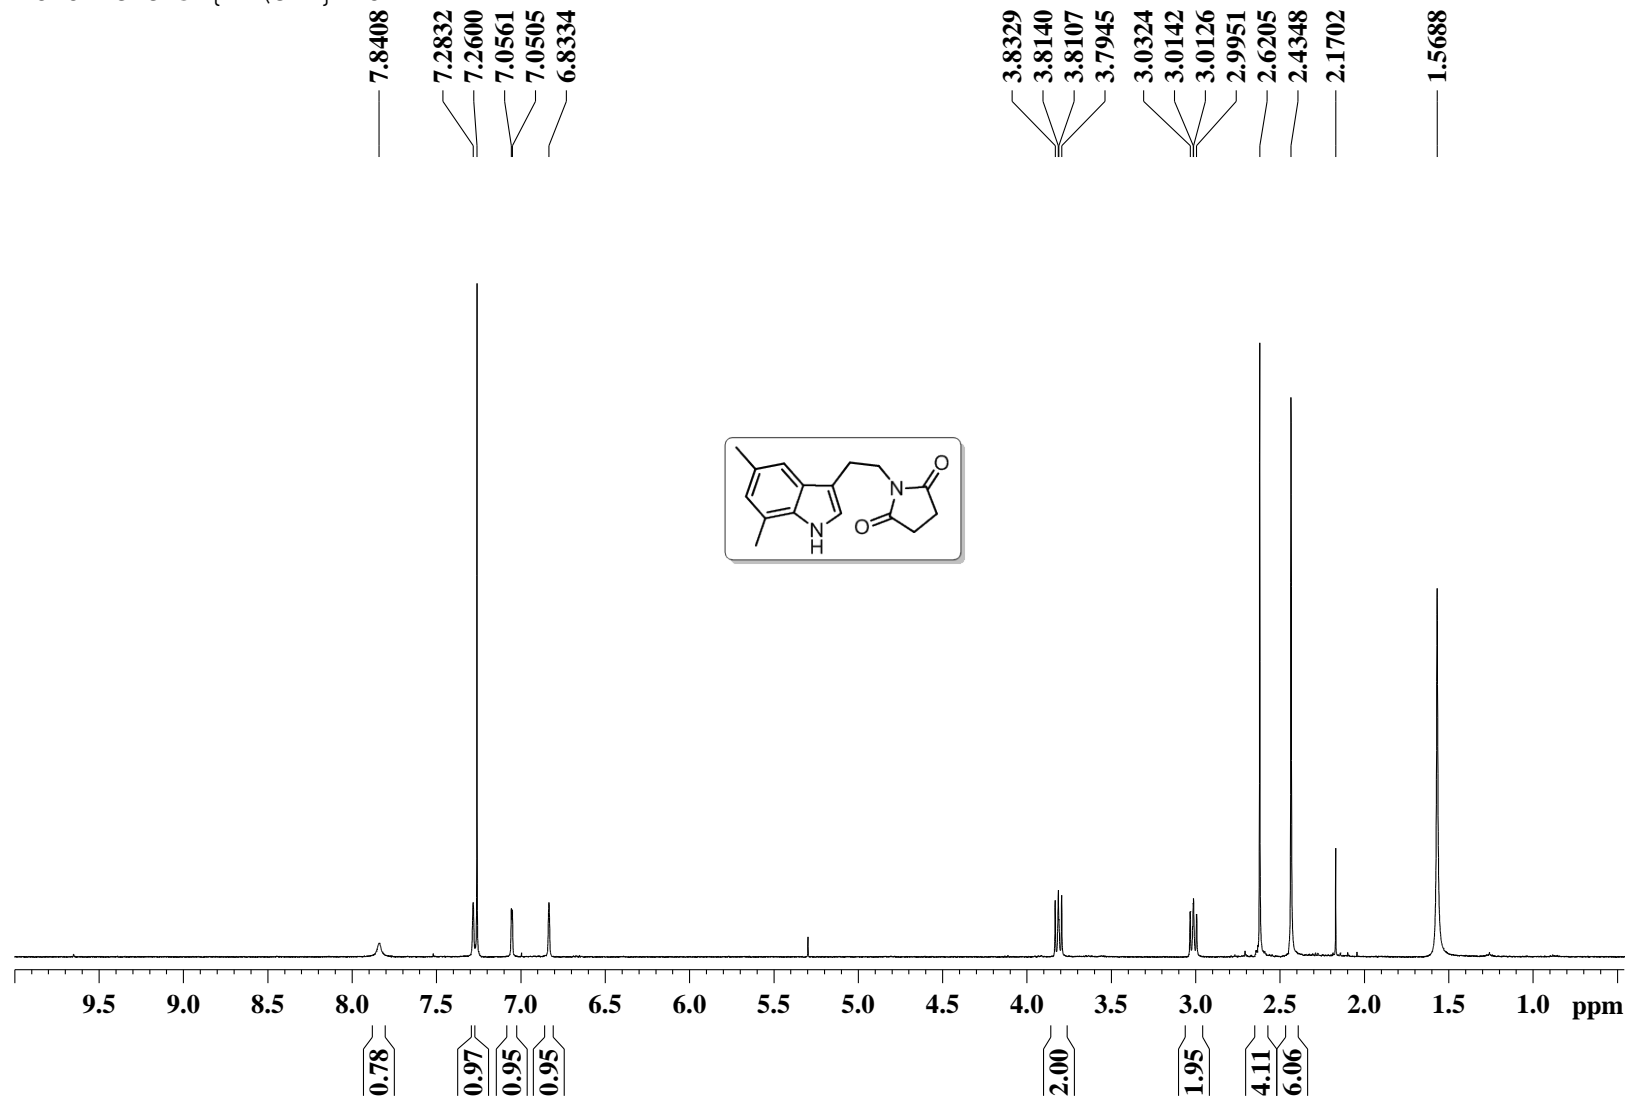



C13CPD CDC13 {D:\CRR} KOPAL 1

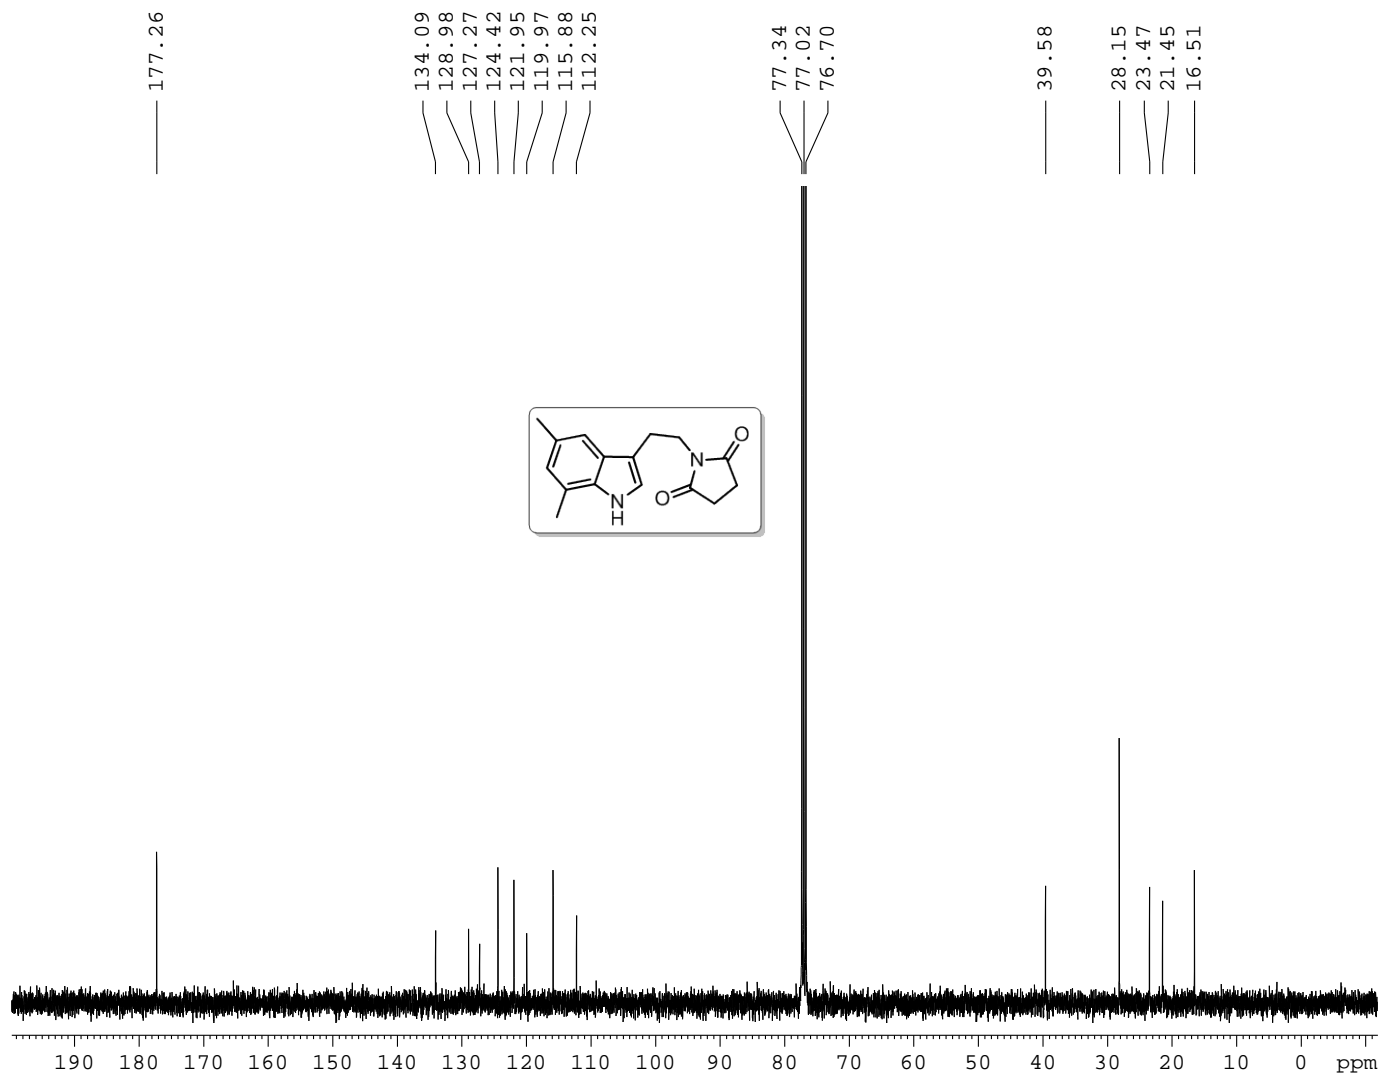

Current Data Parameters  
NAME SMR-2,4-D1-IMI  
EXPNO 2  
PROCNO 1

F2 - Acquisition Parameters  
Date\_ 20110727  
Time 12.02  
INSTRUM spect  
PROBHD 5 mm BBO BB-1H  
PULPROG zgpg30  
TD 65536  
SOLVENT CDC13  
NS 256  
DS 4  
SWH 24038.461 Hz  
FIDRES 0.366798 Hz  
AQ 1.3631988 sec  
RG 50.8  
DW 20.800 usec  
DE 6.00 usec  
TE 296.3 K  
D1 2.00000000 sec  
d11 0.03000000 sec  
DELTA 1.89999998 sec  
TD0 1

==== CHANNEL f1 =====  
NUC1 13C  
P1 9.50 usec  
PL1 -0.60 dB  
SFO1 100.6228298 MHz

==== CHANNEL f2 =====  
CPDPRG2 waltz16  
NUC2 1H  
PCPD2 90.00 usec  
PL12 15.60 dB  
PL13 15.60 dB  
PL2 -0.90 dB  
SFO2 400.1316005 MHz

F2 - Processing parameters  
SI 32768  
SF 100.6127690 MHz  
WDW EM  
SSB 0  
LB 1.00 Hz  
GB 0  
PC 1.40

S65

PROTON CDC13 {D:\CRR} KOPAL 1

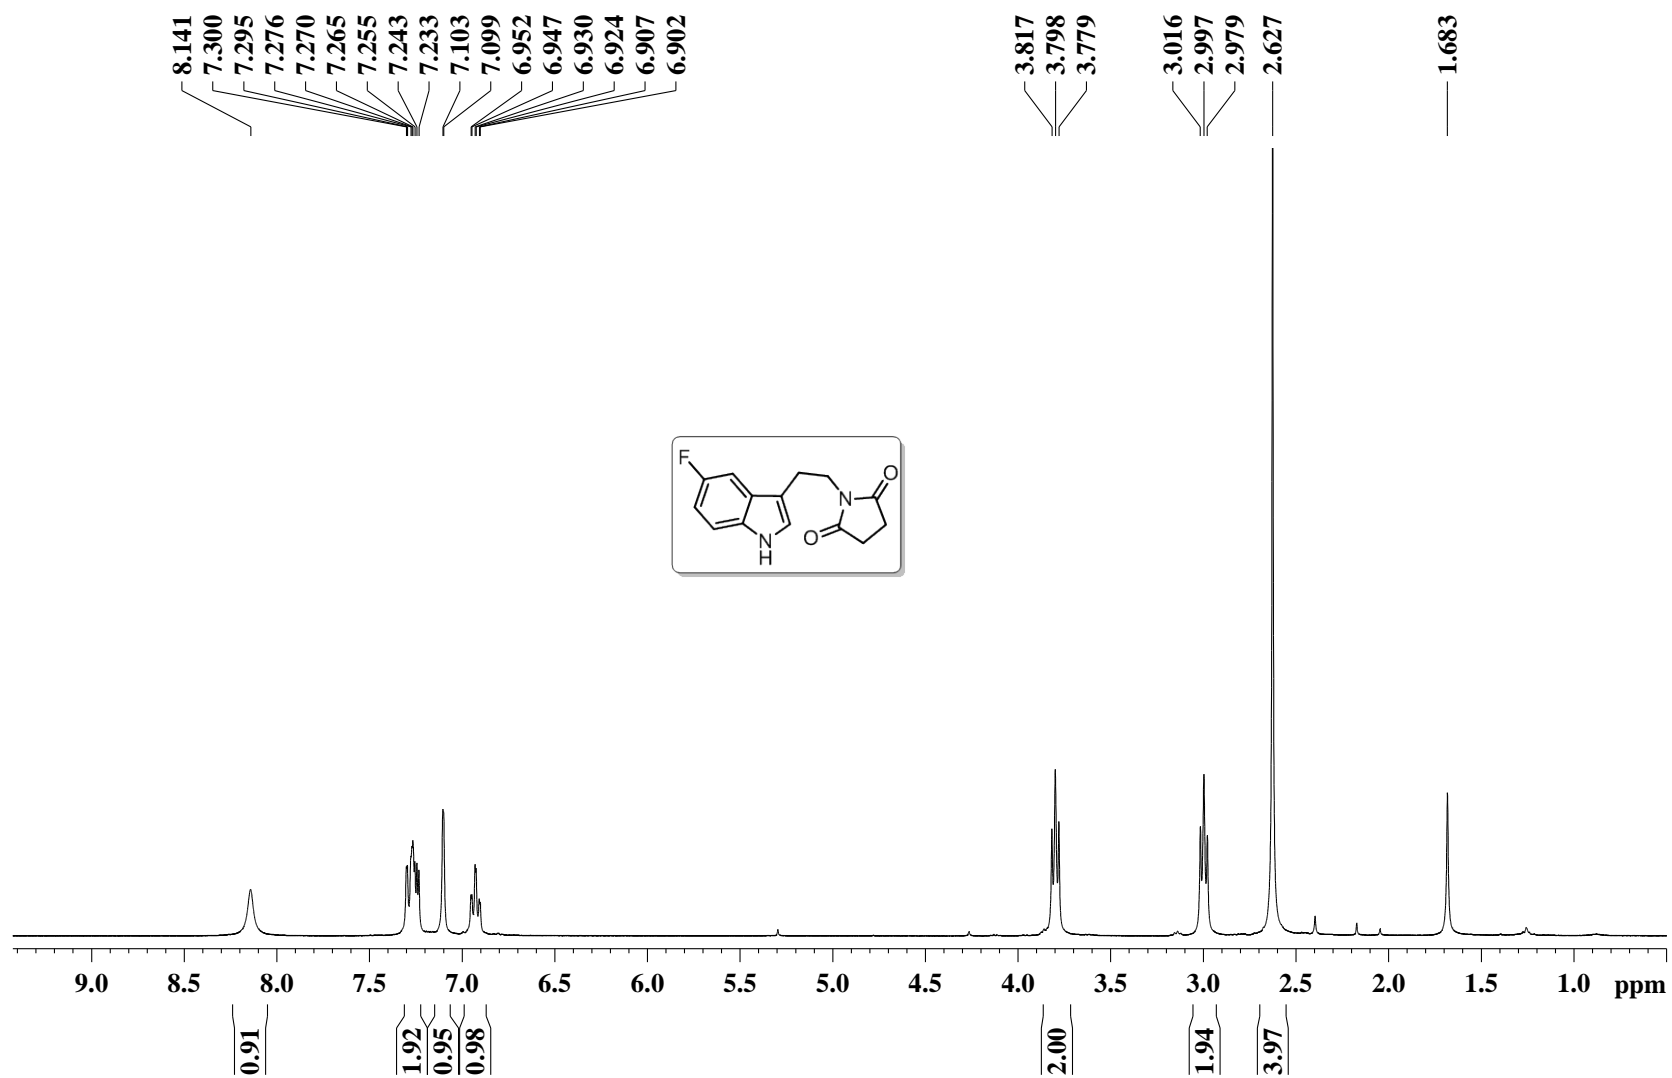

C13CPD CDC13 {D:\CRR} KOPAL 1

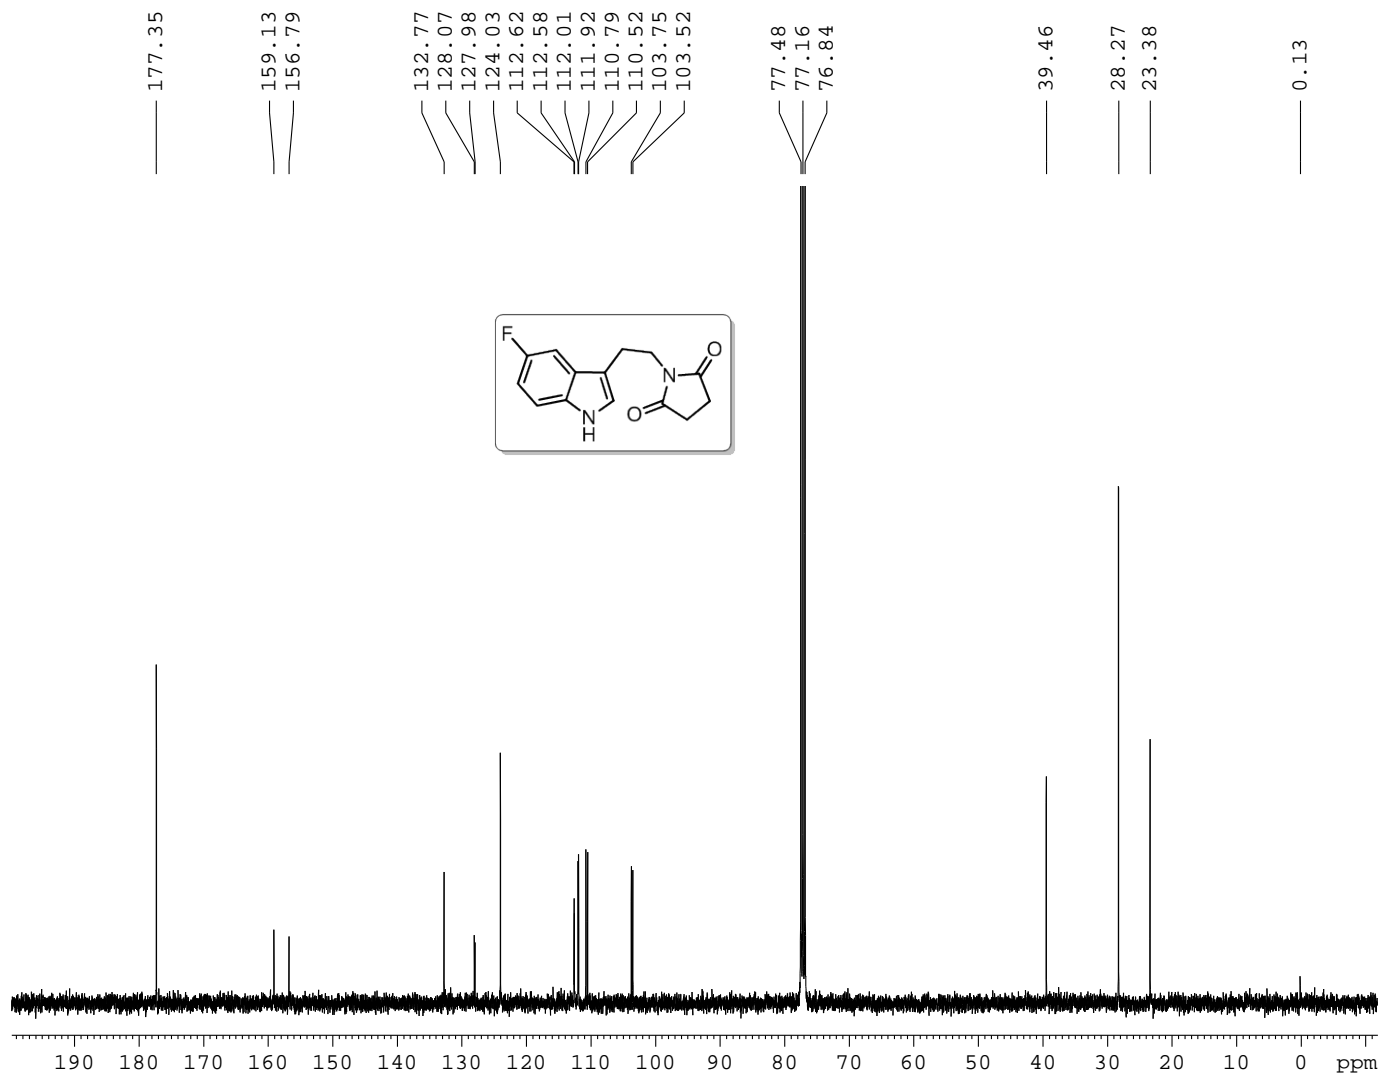

Current Data Parameters  
NAME SMR-4DS  
EXPNO 1  
PROCNO 1

F2 - Acquisition Parameters  
Date\_ 20120216  
Time 18.14  
INSTRUM spect  
PROBHD 5 mm BBO BB-1H  
PULPROG zgpg30  
TD 65536  
SOLVENT CDC13  
NS 1024  
DS 4  
SWH 24038.461 Hz  
FIDRES 0.366798 Hz  
AQ 1.3631988 sec  
RG 50.8  
DW 20.800 usec  
DE 6.00 usec  
TE 297.7 K  
D1 2.00000000 sec  
d11 0.03000000 sec  
DELTA 1.899999998 sec  
TD0 1

==== CHANNEL f1 =====  
NUC1 13C  
P1 9.50 usec  
PL1 -0.60 dB  
SFO1 100.6228298 MHz

==== CHANNEL f2 =====  
CPDPRG2 waltz16  
NUC2 1H  
PCPD2 90.00 usec  
PL12 15.60 dB  
PL13 15.60 dB  
PL2 -0.90 dB  
SFO2 400.1316005 MHz

F2 - Processing parameters  
SI 32768  
SF 100.6127547 MHz  
WDW EM  
SSB 0  
LB 1.00 Hz  
GB 0  
PC 1.40

PROTON CDCl3 {D:\CRR} KOPAL 1

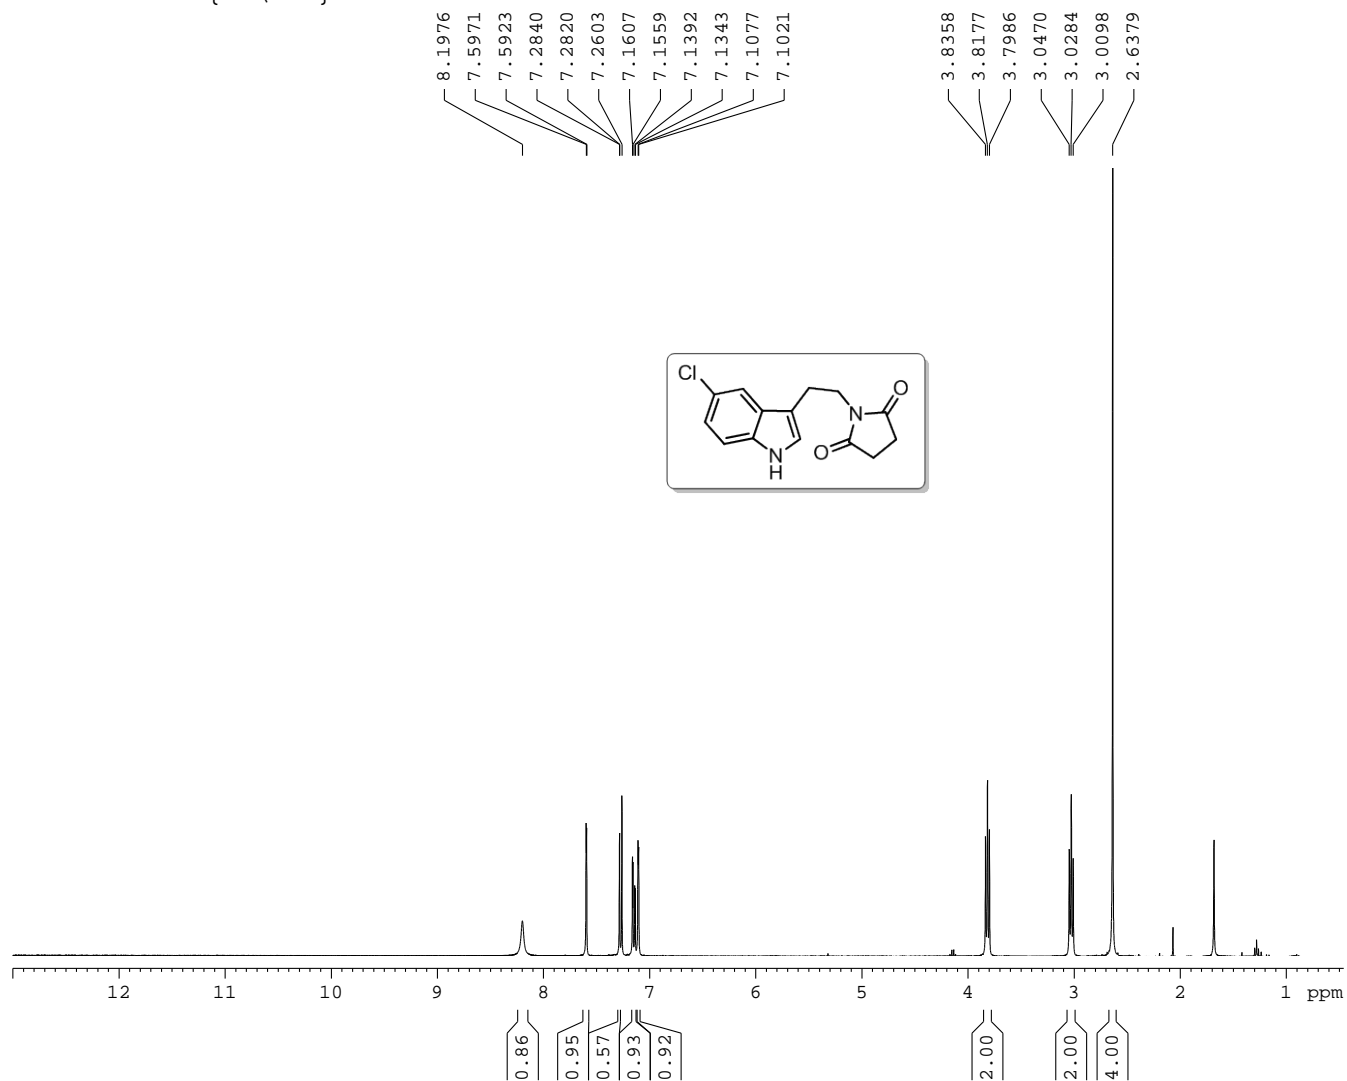

Current Data Parameters  
NAME SMR-I-192-2  
EXPNO 1  
PROCNO 1

F2 - Acquisition Parameters  
Date\_ 20110324  
Time 11.48  
INSTRUM spect  
PROBHD 5 mm BBO BB-1H  
PULPROG zg30  
TD 65536  
SOLVENT CDCl3  
NS 16  
DS 2  
SWH 8223.685 Hz  
FIDRES 0.125483 Hz  
AQ 3.9846387 sec  
RG 256  
DW 60.800 usec  
DE 6.00 usec  
TE 294.4 K  
D1 1.00000000 sec  
TD0 1

==== CHANNEL f1 =====  
NUC1 1H  
P1 14.00 usec  
PL1 -0.90 dB  
SFO1 400.1324710 MHz

F2 - Processing parameters  
SI 32768  
SF 400.1299939 MHz  
WDW EM  
SSB 0  
LB 0.30 Hz  
GB 0  
PC 1.00

C13CPD CDC13 {D:\CRR} KOPAL 1

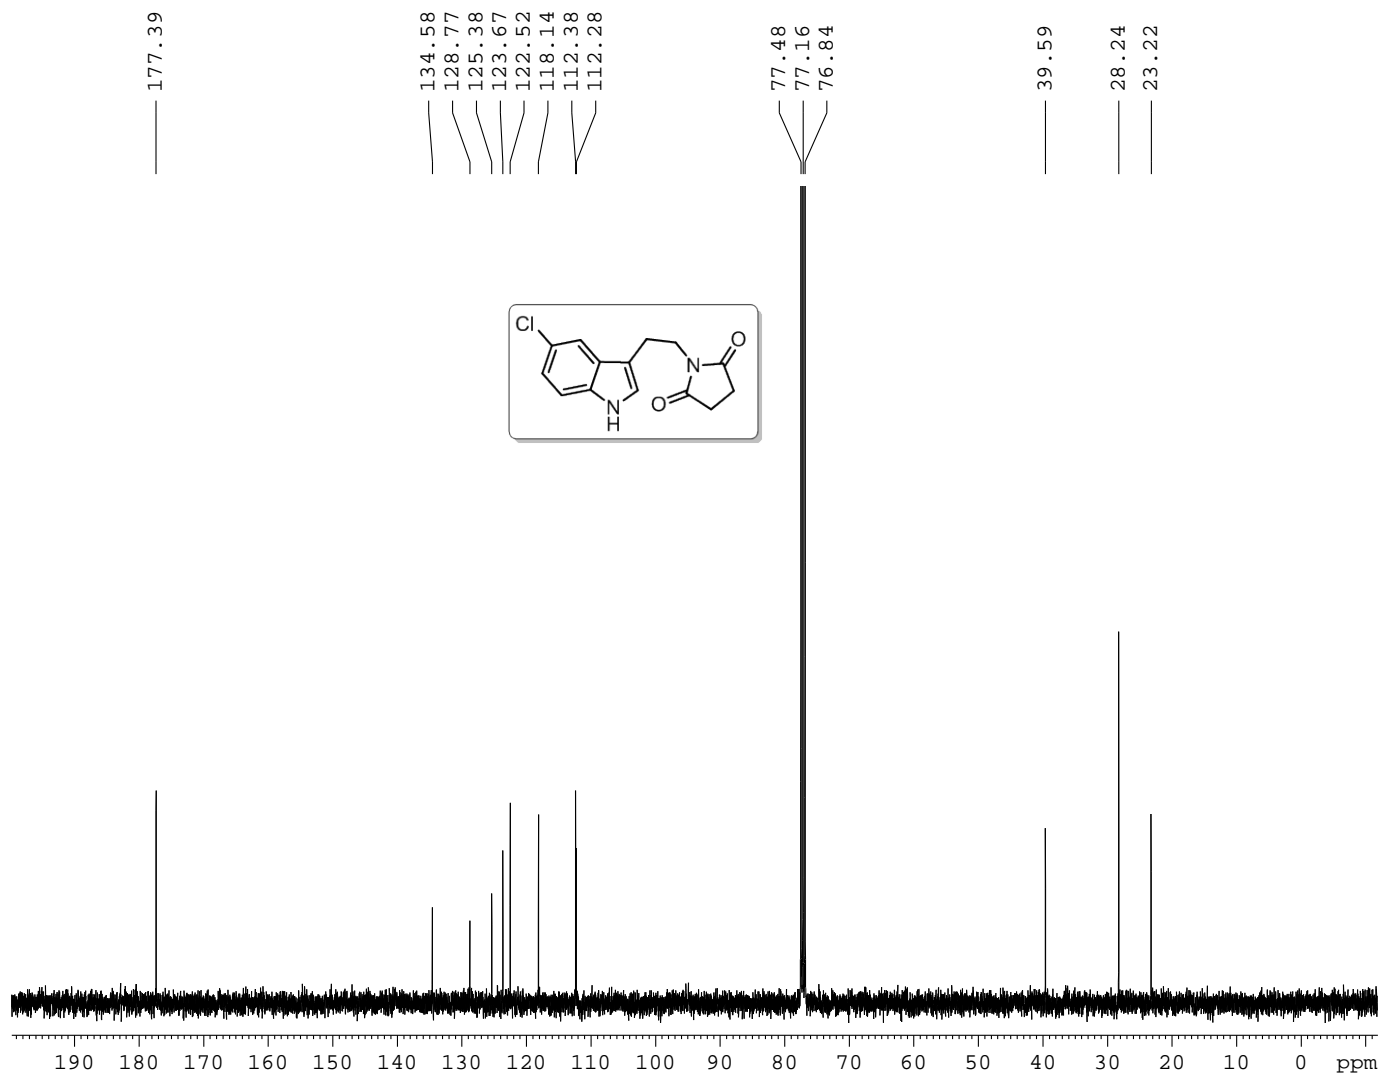

Current Data Parameters  
NAME SMR-I-192-2  
EXPNO 2  
PROCNO 1

F2 - Acquisition Parameters  
Date\_ 20110324  
Time 12.04  
INSTRUM spect  
PROBHD 5 mm BBO BB-1H  
PULPROG zgpg30  
TD 65536  
SOLVENT CDC13  
NS 256  
DS 4  
SWH 24038.461 Hz  
FIDRES 0.366798 Hz  
AQ 1.3631988 sec  
RG 1030  
DW 20.800 usec  
DE 6.00 usec  
TE 294.8 K  
D1 2.00000000 sec  
d11 0.03000000 sec  
DELTA 1.89999998 sec  
TD0 1

==== CHANNEL f1 =====  
NUC1 13C  
P1 9.50 usec  
PL1 -0.60 dB  
SFO1 100.6228298 MHz

==== CHANNEL f2 =====  
CPDPRG2 waltz16  
NUC2 1H  
PCPD2 90.00 usec  
PL12 15.60 dB  
PL13 15.60 dB  
PL2 -0.90 dB  
SFO2 400.1316005 MHz

F2 - Processing parameters  
SI 32768  
SF 100.6127561 MHz  
WDW EM  
SSB 0  
LB 1.00 Hz  
GB 0  
PC 1.40

PROTON CDCl3 {D:\CRR} KOPAL 1

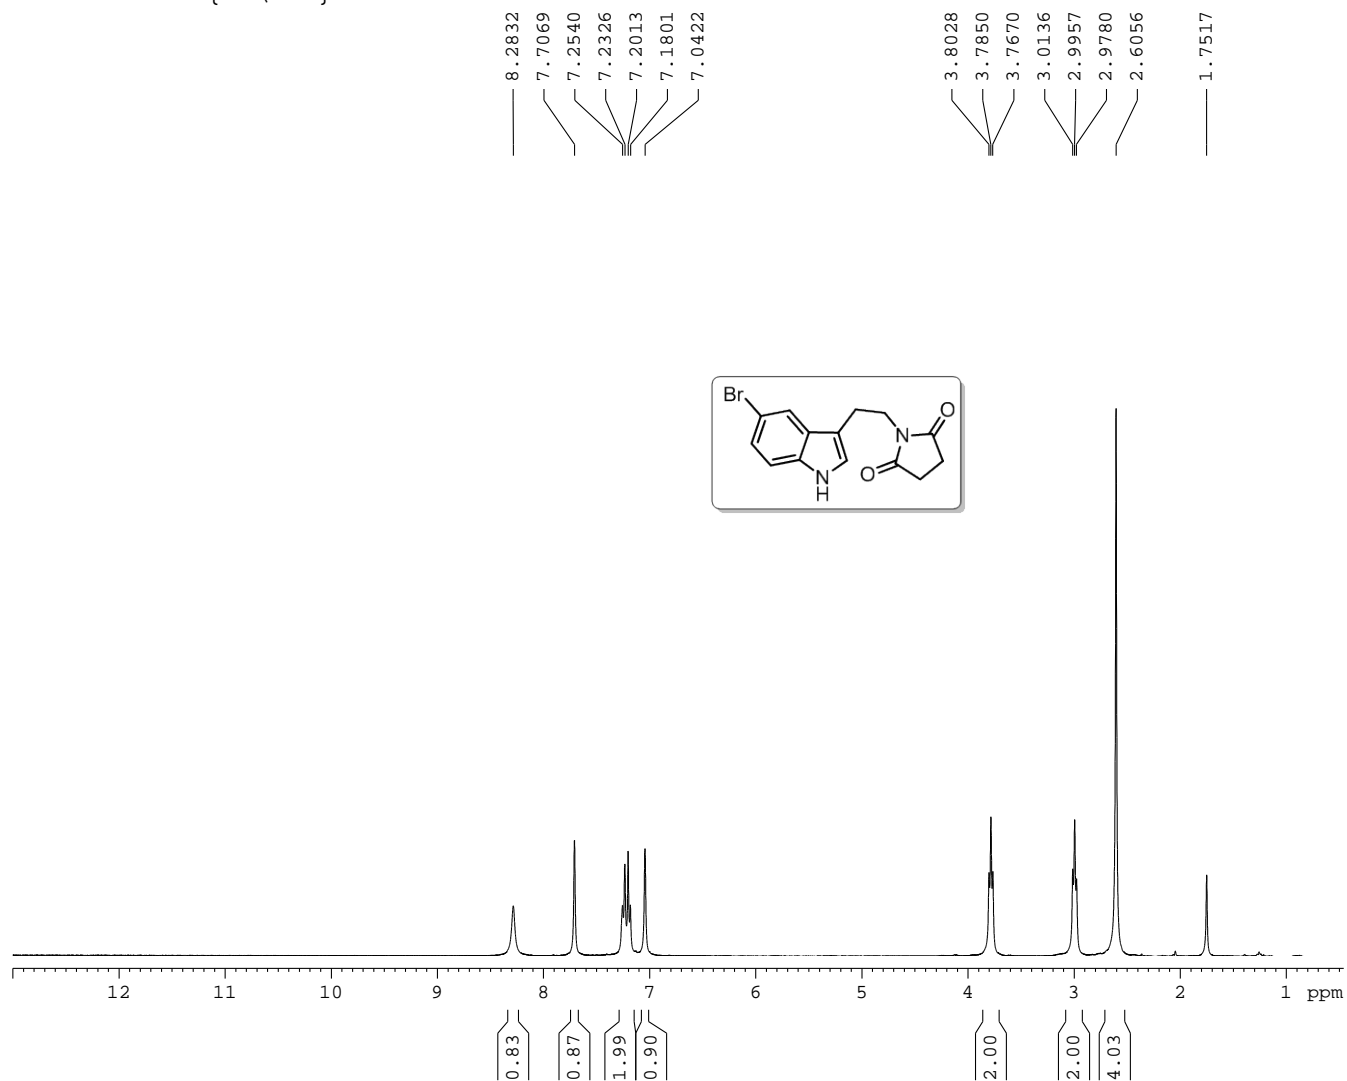

Current Data Parameters  
NAME SMR-1-187-2  
EXPNO 1  
PROCNO 1

F2 - Acquisition Parameters  
Date\_ 20110314  
Time 12.08  
INSTRUM spect  
PROBHD 5 mm BBO BB-1H  
PULPROG zg30  
TD 65536  
SOLVENT CDCl3  
NS 16  
DS 2  
SWH 8223.685 Hz  
FIDRES 0.125483 Hz  
AQ 3.9846387 sec  
RG 161  
DW 60.800 usec  
DE 6.00 usec  
TE 294.5 K  
D1 1.00000000 sec  
TD0 1

==== CHANNEL f1 =====  
NUC1 1H  
P1 14.00 usec  
PL1 -0.90 dB  
SFO1 400.1324710 MHz

F2 - Processing parameters  
SI 32768  
SF 400.1300002 MHz  
WDW EM  
SSB 0  
LB 0.30 Hz  
GB 0  
PC 1.00

C13CPD CDC13 {D:\CRR} KOPAL 1

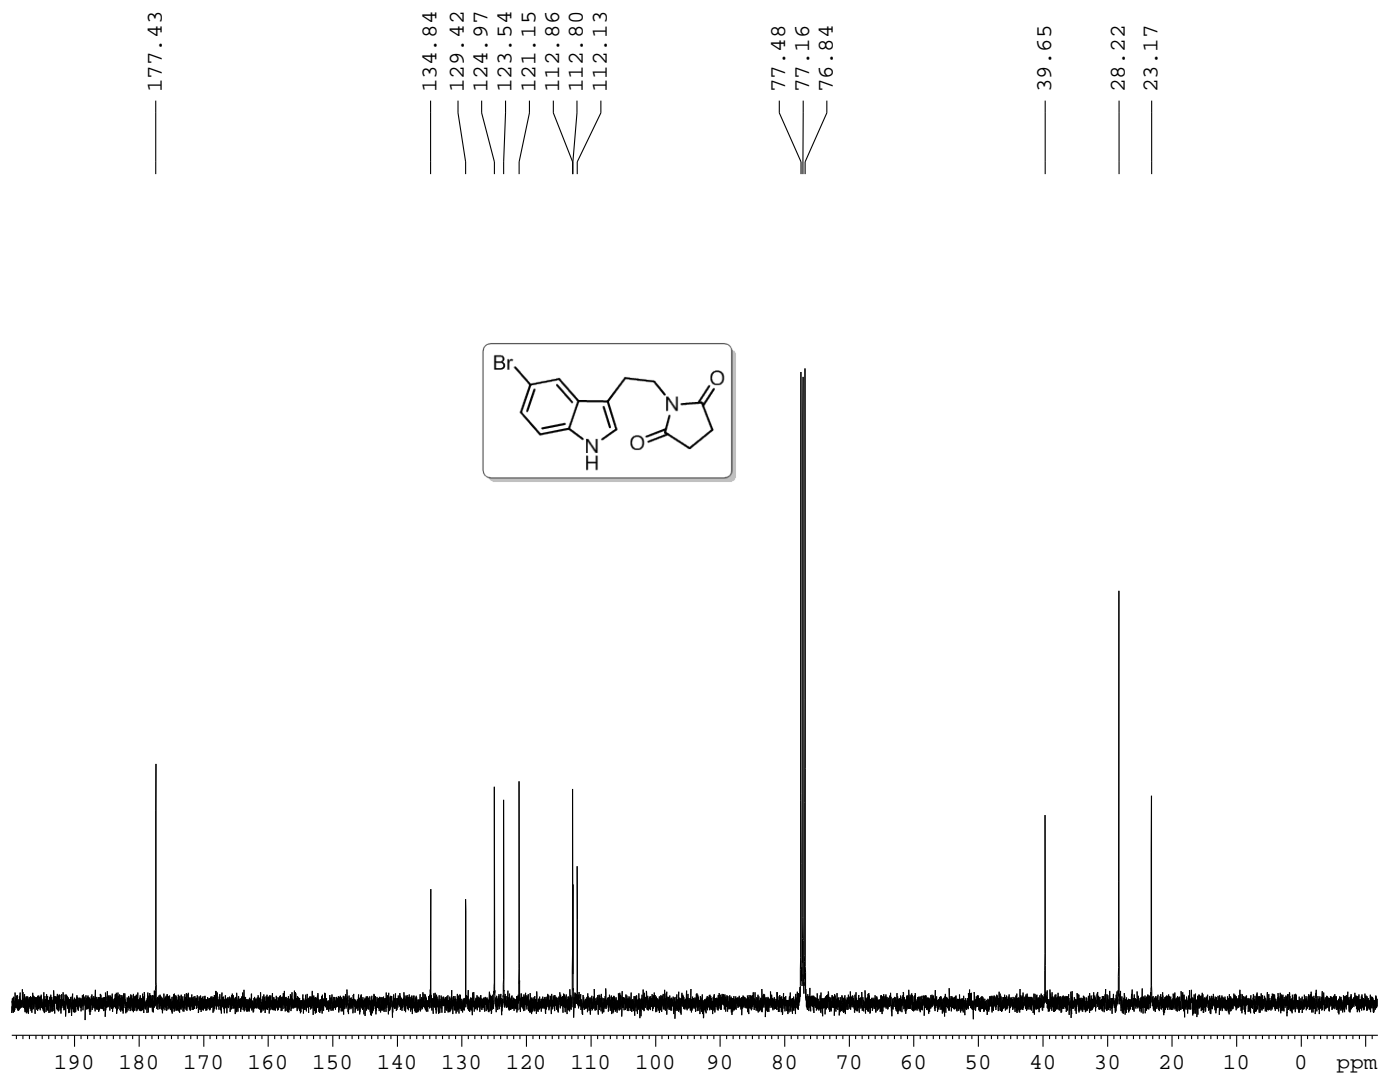

Current Data Parameters  
NAME SMR-1-187-2  
EXPNO 2  
PROCNO 1

F2 - Acquisition Parameters  
Date\_ 20110314  
Time 12.17  
INSTRUM spect  
PROBHD 5 mm BBO BB-1H  
PULPROG zgpg30  
TD 65536  
SOLVENT CDC13  
NS 199  
DS 4  
SWH 24038.461 Hz  
FIDRES 0.366798 Hz  
AQ 1.3631988 sec  
RG 645  
DW 20.800 usec  
DE 6.00 usec  
TE 295.3 K  
D1 2.00000000 sec  
d11 0.03000000 sec  
DELTA 1.89999998 sec  
TD0 1

==== CHANNEL f1 =====  
NUC1 13C  
P1 9.50 usec  
PL1 -0.60 dB  
SFO1 100.6228298 MHz

==== CHANNEL f2 =====  
CPDPRG2 waltz16  
NUC2 1H  
PCPD2 90.00 usec  
PL12 15.60 dB  
PL13 15.60 dB  
PL2 -0.90 dB  
SFO2 400.1316005 MHz

F2 - Processing parameters  
SI 32768  
SF 100.6127584 MHz  
WDW EM  
SSB 0  
LB 1.00 Hz  
GB 0  
PC 1.40

S71

PROTON CDCl3 {D:\CRR} KOPAL\_1

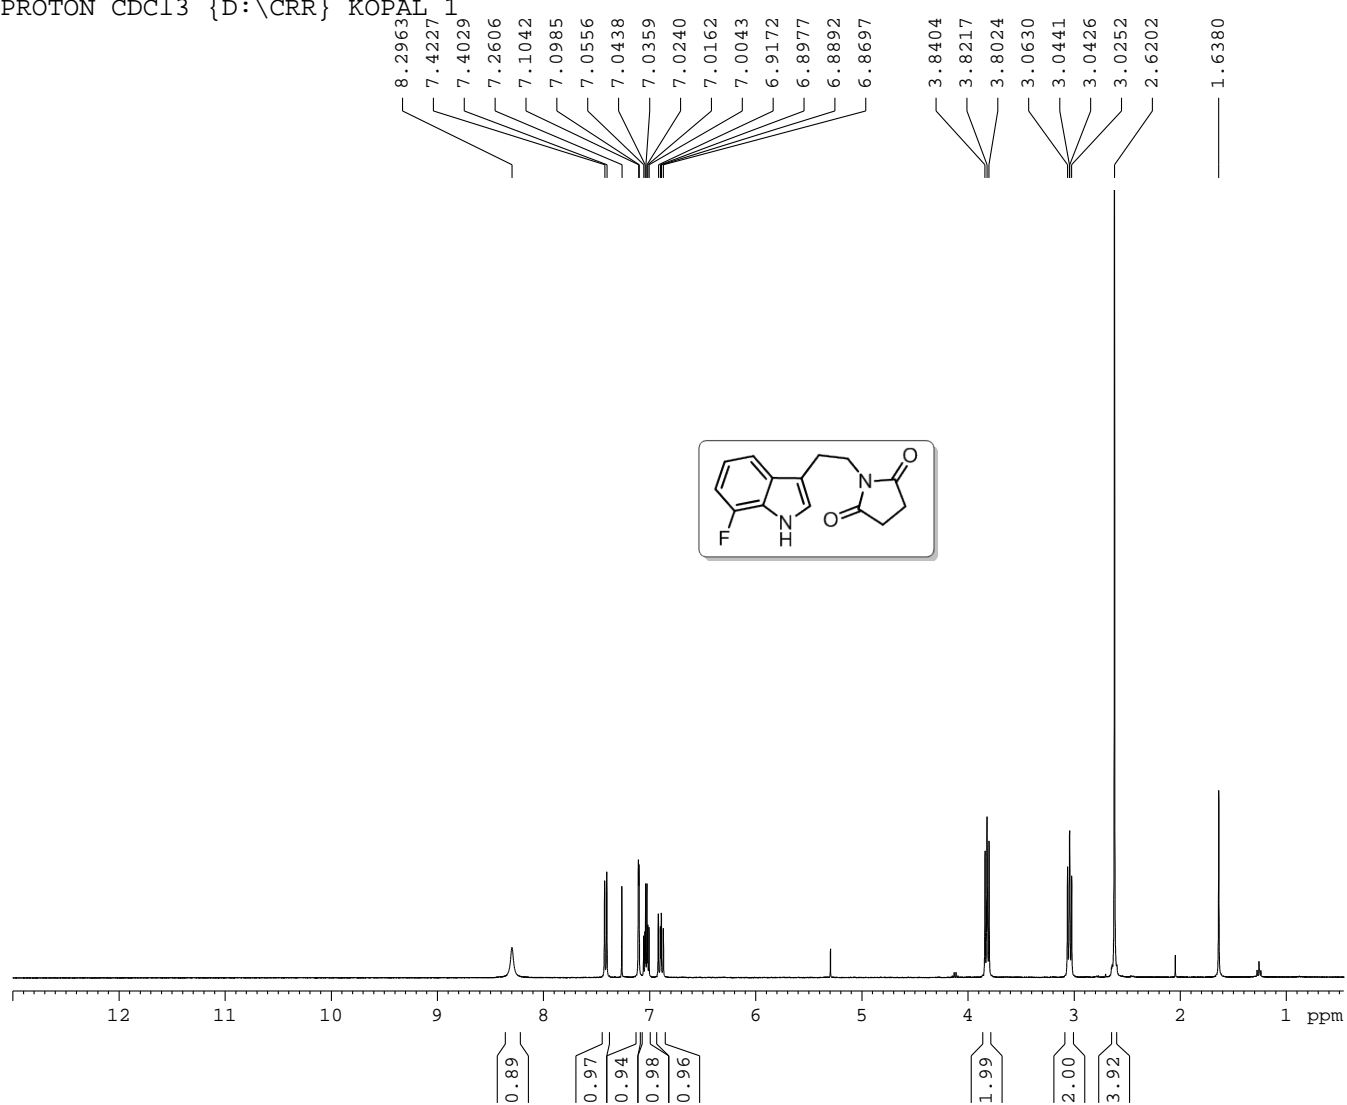

Current Data Parameters  
NAME SMR-I-194-2  
EXPNO 1  
PROCNO 1

F2 - Acquisition Parameters  
Date\_ 20110324  
Time 15.40  
INSTRUM spect  
PROBHD 5 mm BBO BB-1H  
PULPROG zg30  
TD 65536  
SOLVENT CDCl3  
NS 16  
DS 2  
SWH 8223.685 Hz  
FIDRES 0.125483 Hz  
AQ 3.9846387 sec  
RG 256  
DW 60.800 usec  
DE 6.00 usec  
TE 294.2 K  
D1 1.00000000 sec  
TD0 1

==== CHANNEL f1 =====  
NUC1 1H  
P1 14.00 usec  
PL1 -0.90 dB  
SFO1 400.1324710 MHz

F2 - Processing parameters  
SI 32768  
SF 400.1300034 MHz  
WDW EM  
SSB 0  
LB 0.30 Hz  
GB 0  
PC 1.00



C13CPD CDC13 {D:\CRR} KOPAL 1

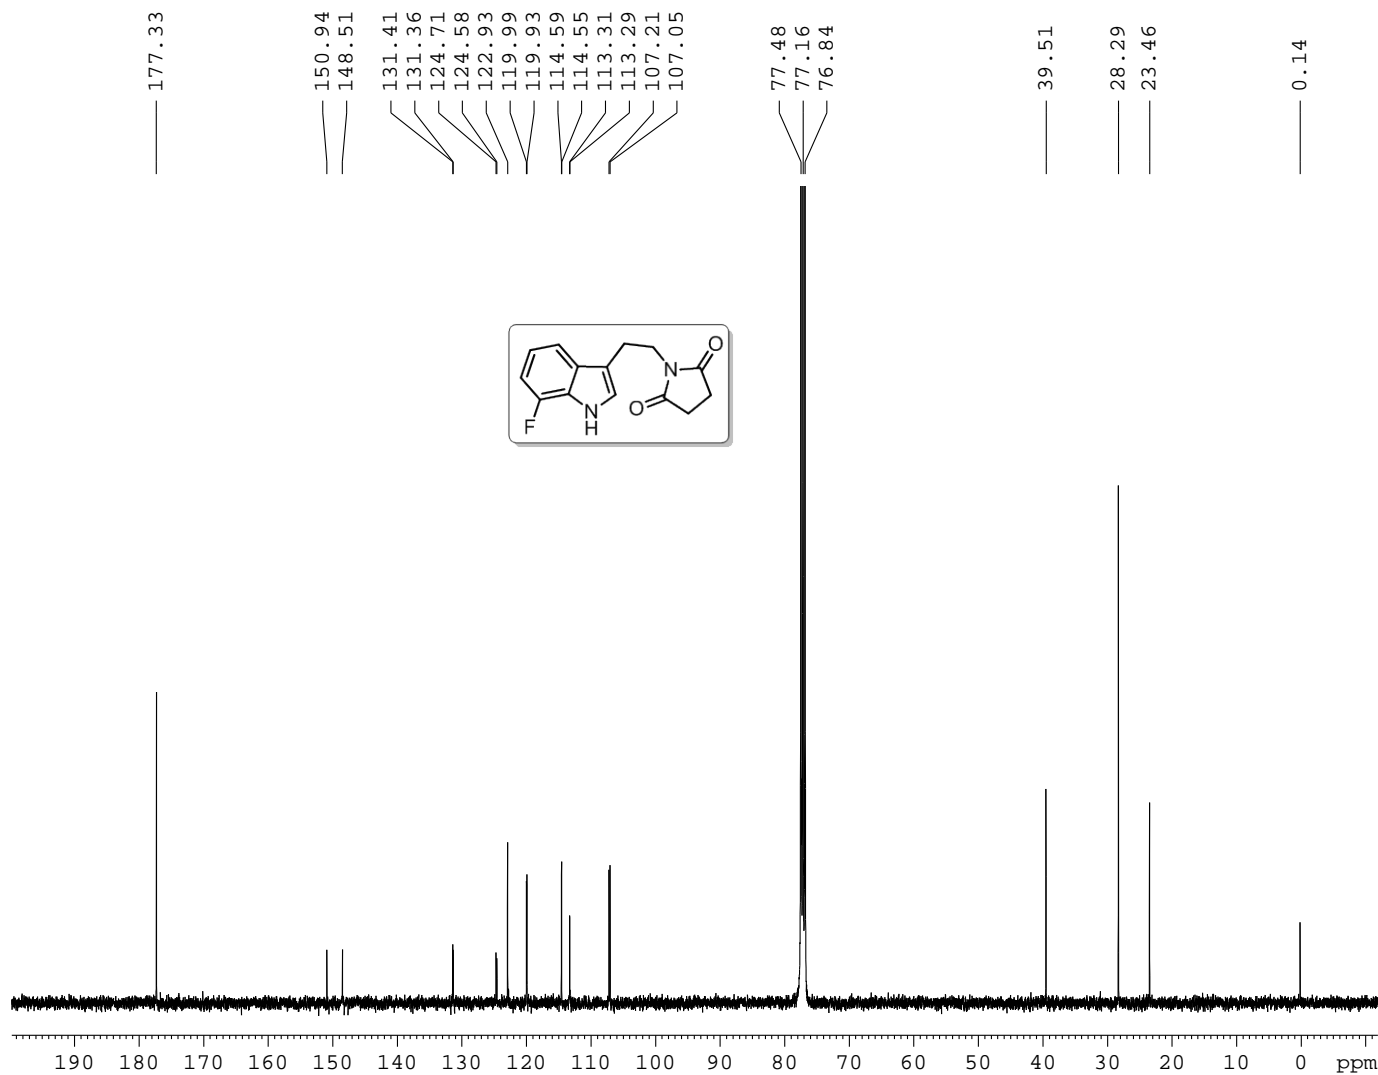

Current Data Parameters  
NAME SMR-ON  
EXPNO 1  
PROCNO 1

F2 - Acquisition Parameters  
Date\_ 20120221  
Time 9.25  
INSTRUM spect  
PROBHD 5 mm BBO BB-1H  
PULPROG zgpg30  
TD 65536  
SOLVENT CDC13  
NS 17000  
DS 4  
SWH 24038.461 Hz  
FIDRES 0.366798 Hz  
AQ 1.3631988 sec  
RG 57  
DW 20.800 usec  
DE 6.00 usec  
TE 297.8 K  
D1 2.00000000 sec  
d11 0.03000000 sec  
DELTA 1.899999998 sec  
TD0 1

==== CHANNEL f1 =====  
NUC1 13C  
P1 9.50 usec  
PL1 -0.60 dB  
SFO1 100.6228298 MHz

==== CHANNEL f2 =====  
CPDPRG2 waltz16  
NUC2 1H  
PCPD2 90.00 usec  
PL12 15.60 dB  
PL13 15.60 dB  
PL2 -0.90 dB  
SFO2 400.1316005 MHz

F2 - Processing parameters  
SI 32768  
SF 100.6127526 MHz  
WDW EM  
SSB 0  
LB 1.00 Hz  
GB 0  
PC 1.40

S73

PROTON CDC13 {D:\CRR} KOPAL 1

8.0284  
7.7819  
7.7628  
7.3558  
7.3361  
7.2599  
7.2050  
7.1878  
7.1694  
7.1557  
7.1367  
7.1192  
7.0655  
7.0613

4.0902  
4.0707  
4.0506

3.0014  
2.9814  
2.9620  
2.6333  
2.6171  
2.6008  
1.9061  
1.8897  
1.8736  
1.8575  
1.8412  
1.6203

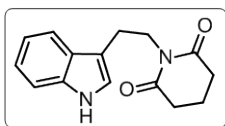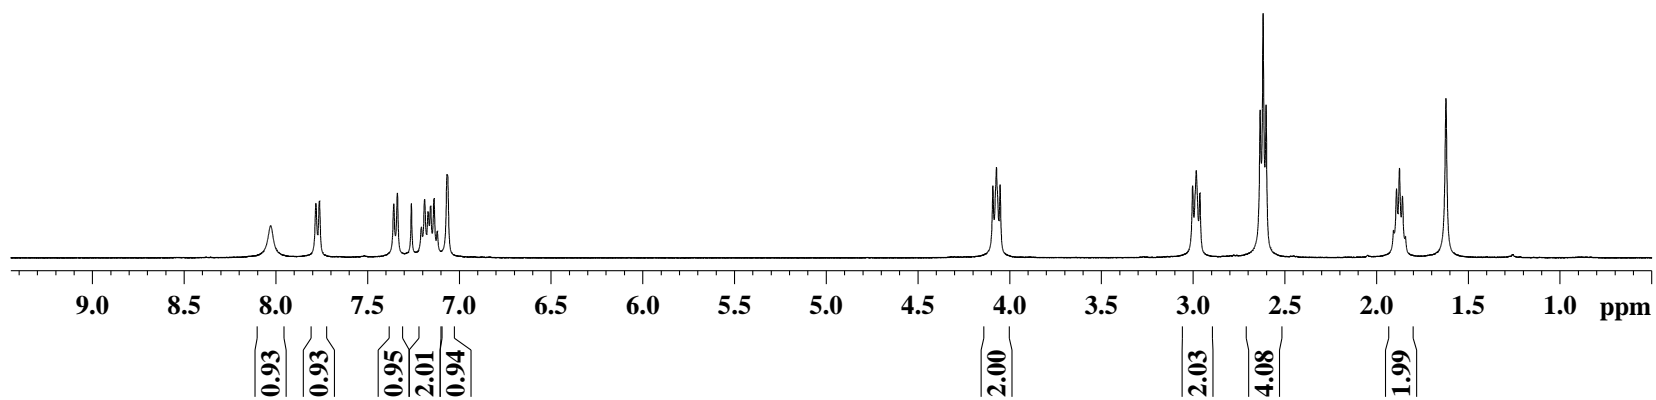

C13CPD CDC13 {D:\CRR} KOPAL 1

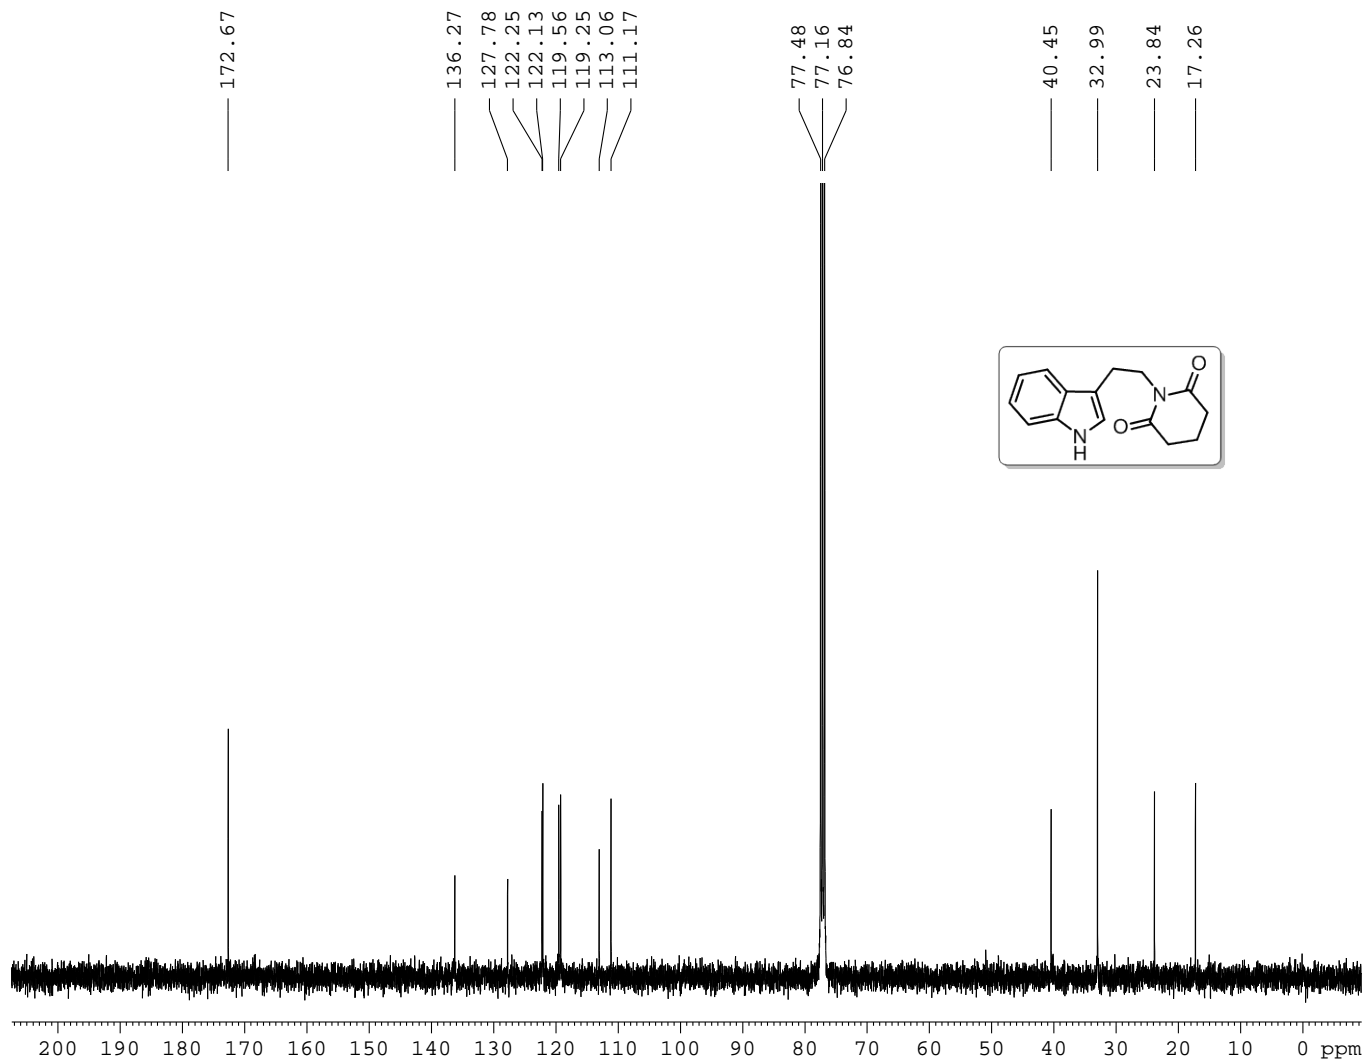

Current Data Parameters  
NAME SMR-I-200-3  
EXPNO 2  
PROCNO 1

F2 - Acquisition Parameters  
Date\_ 20110406  
Time 9.54  
INSTRUM spect  
PROBHD 5 mm BBO BB-1H  
PULPROG zgpg30  
TD 65536  
SOLVENT CDC13  
NS 1024  
DS 4  
SWH 24038.461 Hz  
FIDRES 0.366798 Hz  
AQ 1.3631988 sec  
RG 50.8  
DW 20.800 usec  
DE 6.00 usec  
TE 295.5 K  
D1 2.00000000 sec  
d11 0.03000000 sec  
DELTA 1.89999998 sec  
TD0 1

=====  
CHANNEL f1  
NUC1 13C  
P1 9.50 usec  
PL1 -0.60 dB  
SFO1 100.6228298 MHz

=====  
CHANNEL f2  
CPDPRG2 waltz16  
NUC2 1H  
PCPD2 90.00 usec  
PL12 15.60 dB  
PL13 15.60 dB  
PL2 -0.90 dB  
SFO2 400.1316005 MHz

F2 - Processing parameters  
SI 32768  
SF 100.6127549 MHz  
WDW EM  
SSB 0  
LB 1.00 Hz  
GB 0  
PC 1.40

PROTON CDC13 {D:\CRR} KOPAL 1

8.0182  
7.7004  
7.6811  
7.3501  
7.3302  
7.2599  
7.2015  
7.1840  
7.1659  
7.1459  
7.1264  
7.1088  
7.0740  
7.0696

3.8415  
3.8227  
3.8033  
3.0872  
3.0677  
3.0491  
2.7828  
2.7635  
2.7526  
2.7416  
2.7221  
2.1717  
1.7921  
1.7737  
1.7656  
1.6403  
1.6280  
1.6112  
1.5787  
1.4206  
1.4120  
1.3977  
1.3824  
1.3652  
1.3523  
1.3339  
1.3288  
1.3164  
1.3051  
1.2951  
1.2577

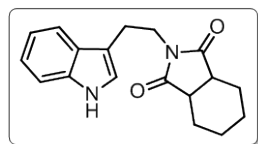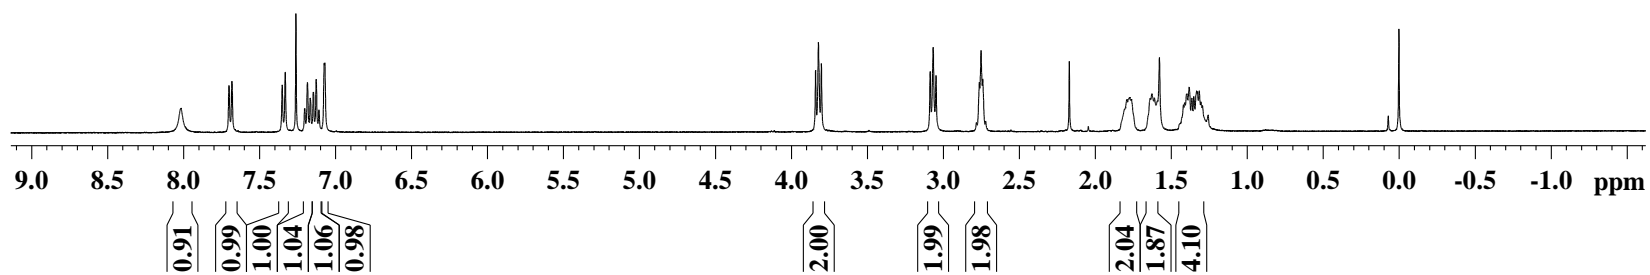

C13CPD CDC13 {D:\CRR} KOPAL 1

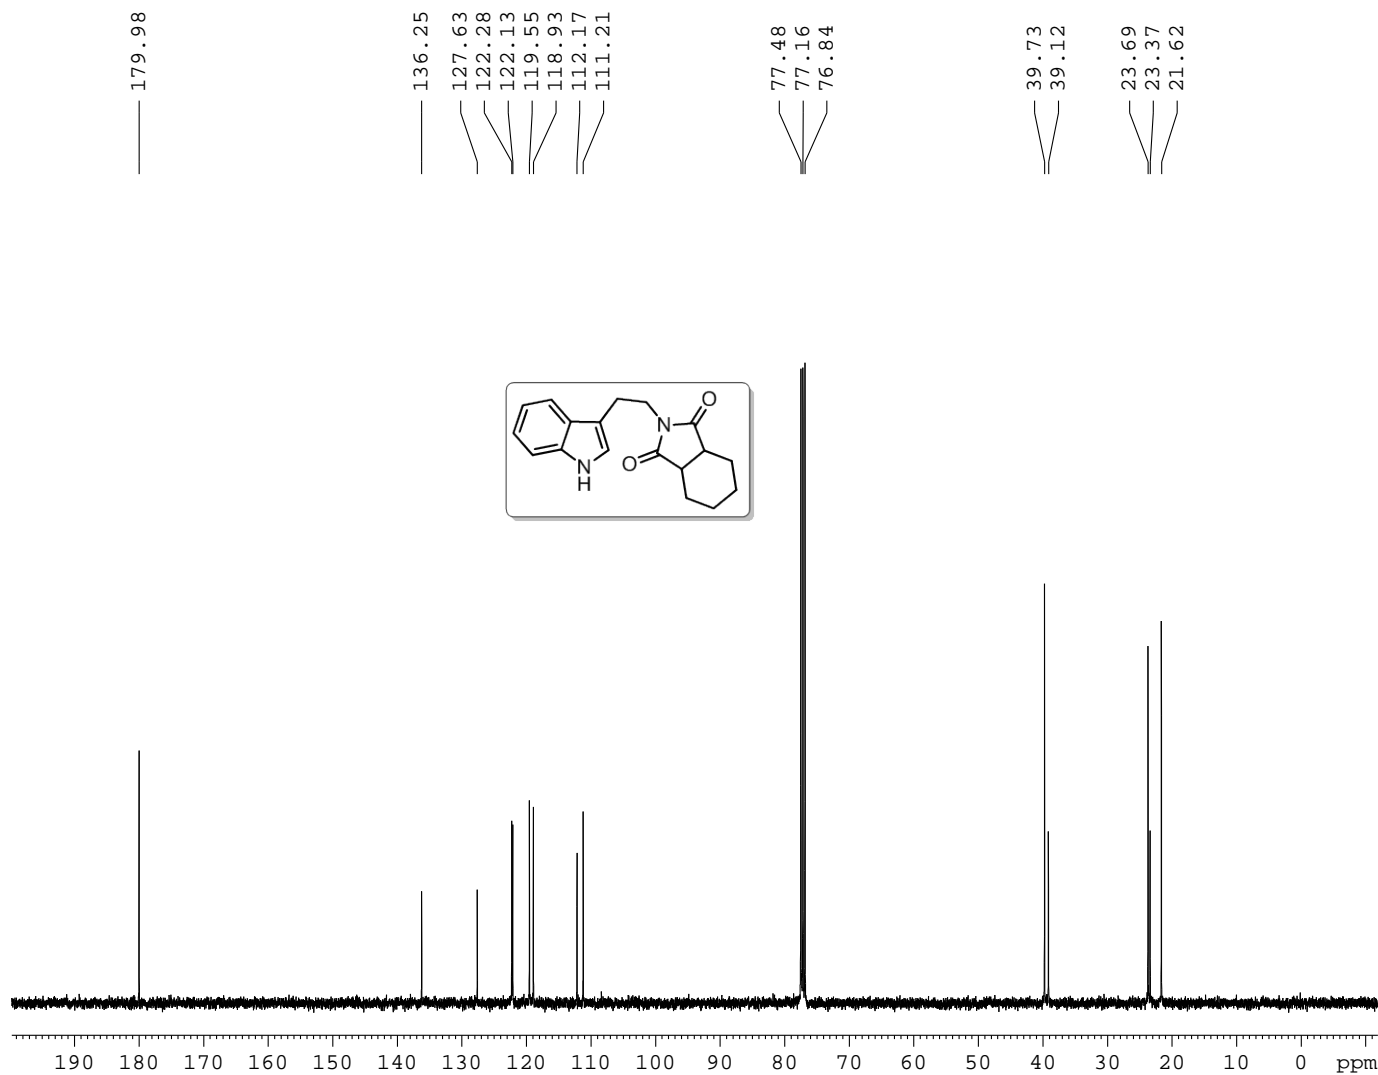

Current Data Parameters  
NAME SMR-ALPHA  
EXPNO 1  
PROCNO 1

F2 - Acquisition Parameters  
Date\_ 20111221  
Time 11.46  
INSTRUM spect  
PROBHD 5 mm BBO BB-1H  
PULPROG zgpg30  
TD 65536  
SOLVENT CDC13  
NS 512  
DS 4  
SWH 24038.461 Hz  
FIDRES 0.366798 Hz  
AQ 1.3631988 sec  
RG 57  
DW 20.800 usec  
DE 6.00 usec  
TE 297.8 K  
D1 2.00000000 sec  
d11 0.03000000 sec  
DELTA 1.89999998 sec  
TD0 1

=====  
CHANNEL f1  
NUC1 13C  
P1 9.50 usec  
PL1 -0.60 dB  
SFO1 100.6228298 MHz

=====  
CHANNEL f2  
CPDPRG2 waltz16  
NUC2 1H  
PCPD2 90.00 usec  
PL12 15.60 dB  
PL13 15.60 dB  
PL2 -0.90 dB  
SFO2 400.1316005 MHz

F2 - Processing parameters  
SI 32768  
SF 100.6127594 MHz  
WDW EM  
SSB 0  
LB 1.00 Hz  
GB 0  
PC 1.40

S77

PROTON CDC13 {D:\CRR} KOPAL 1

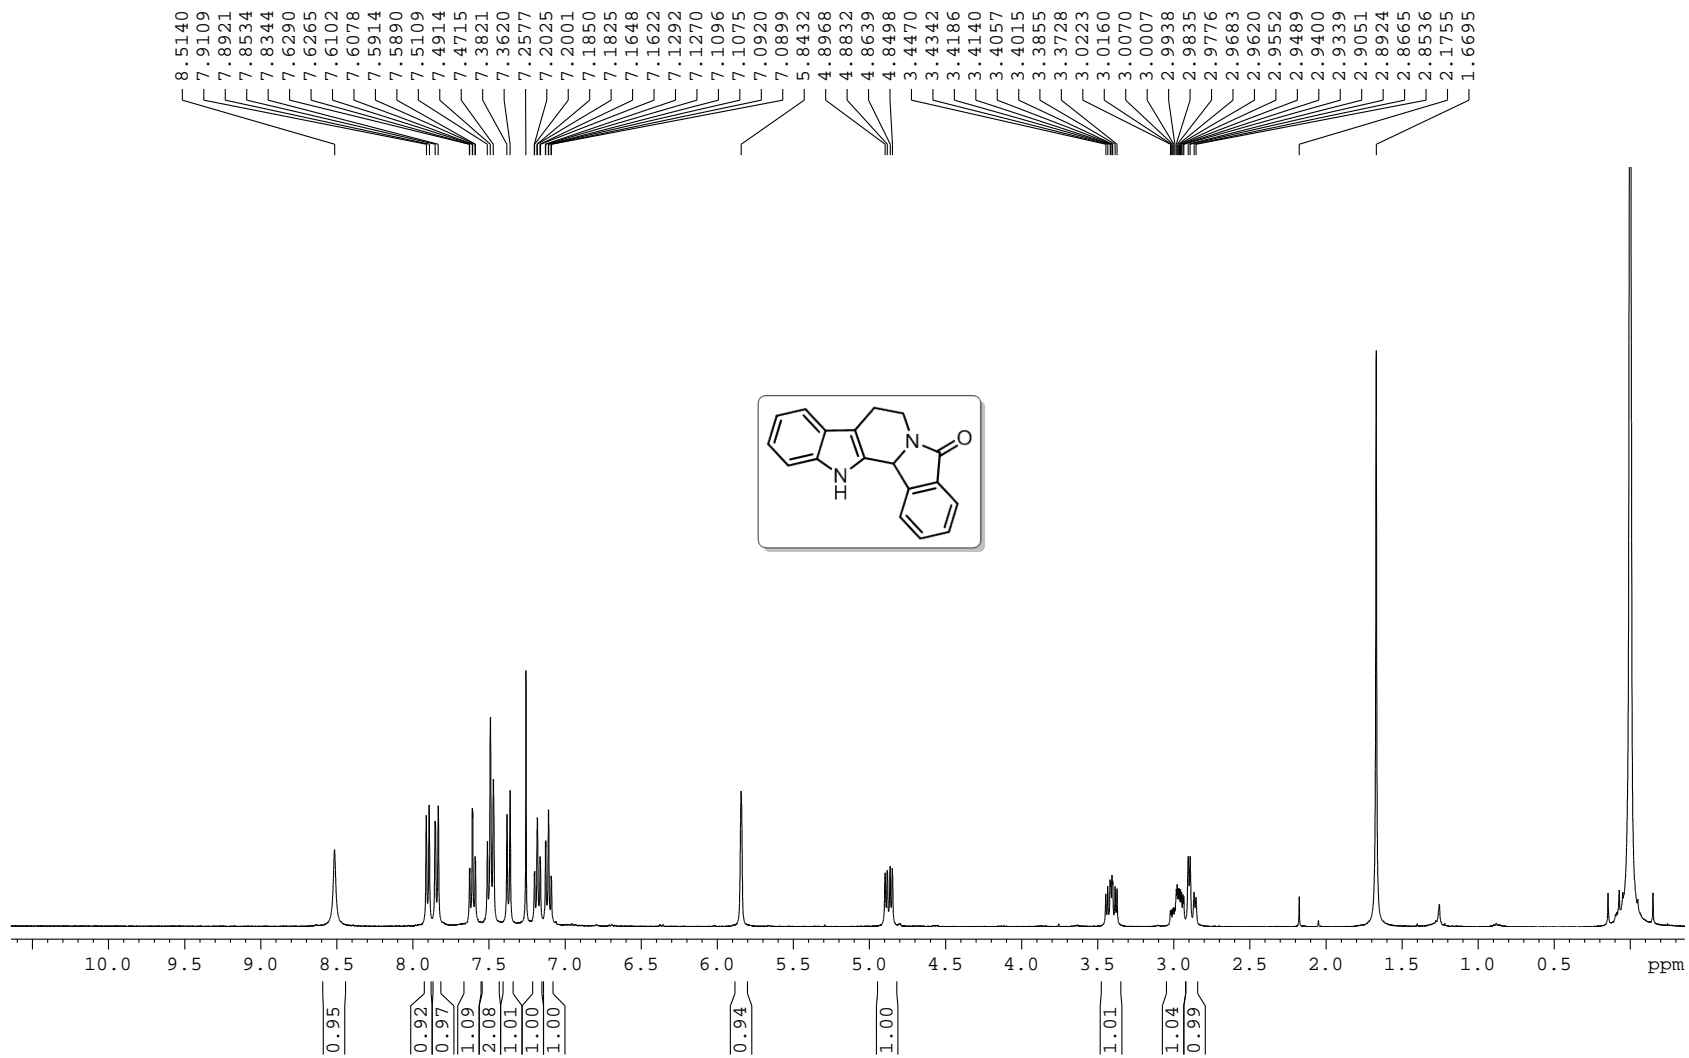

C13CPD CDC13 {D:\CRR} KOPAL 1

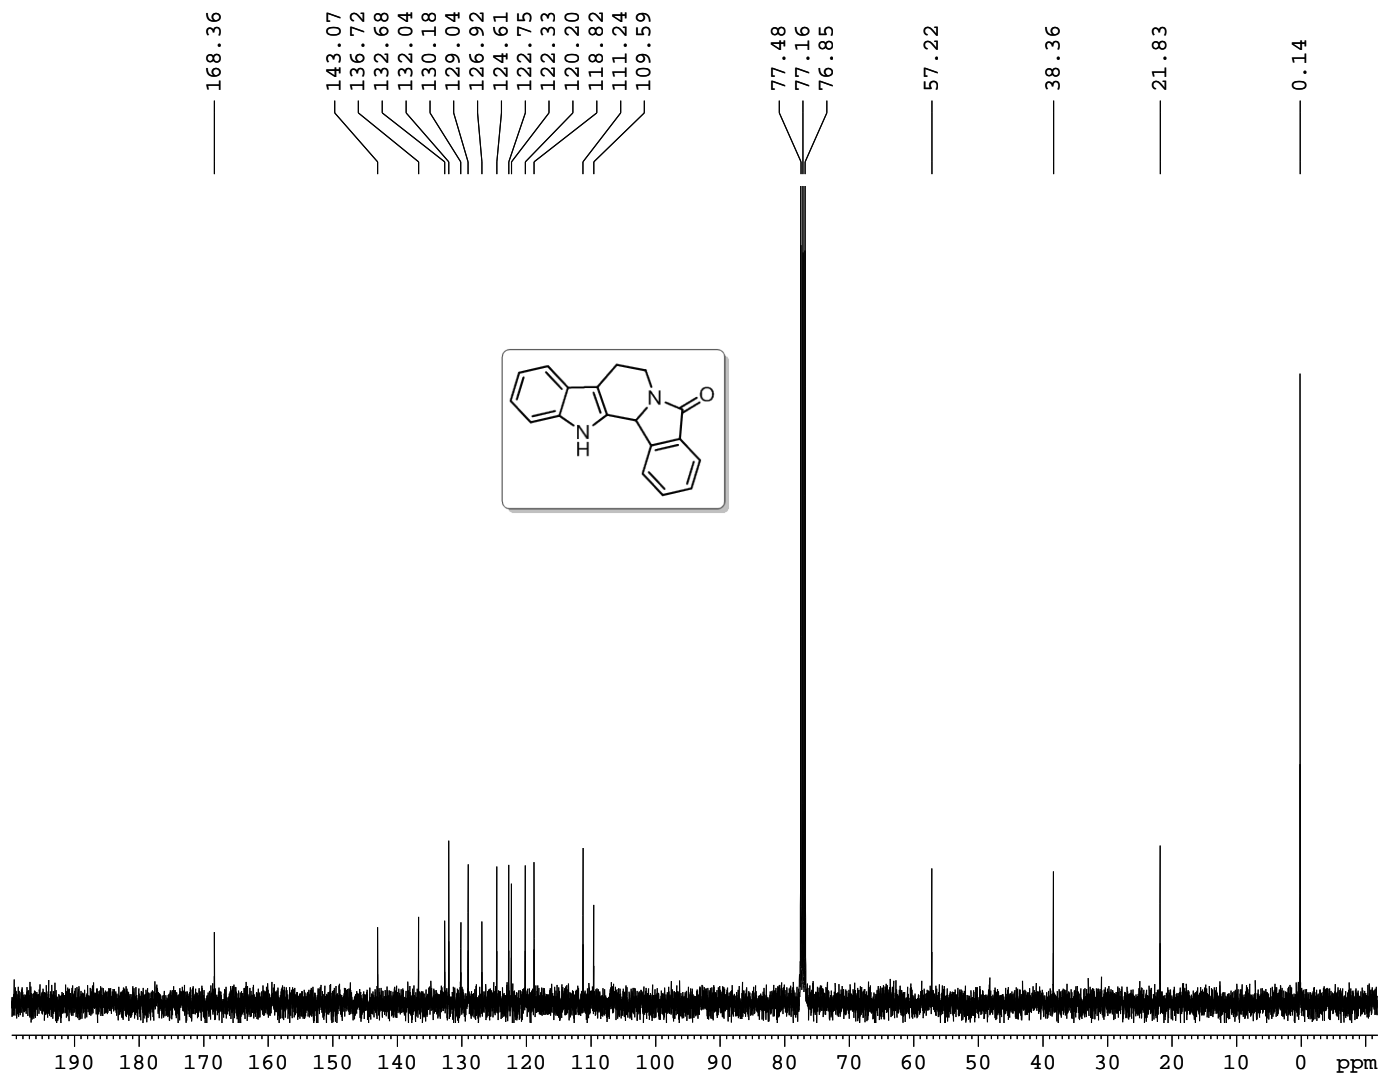

Current Data Parameters  
NAME SMR-I-206-2  
EXPNO 2  
PROCNO 1

F2 - Acquisition Parameters  
Date\_ 20110420  
Time 12.22  
INSTRUM spect  
PROBHD 5 mm BBO BB-1H  
PULPROG zgpg30  
TD 65536  
SOLVENT CDC13  
NS 512  
DS 4  
SWH 24038.461 Hz  
FIDRES 0.366798 Hz  
AQ 1.3631988 sec  
RG 50.8  
DW 20.800 usec  
DE 6.00 usec  
TE 295.2 K  
D1 2.00000000 sec  
d11 0.03000000 sec  
DELTA 1.89999998 sec  
TD0 1

==== CHANNEL f1 =====  
NUC1 13C  
P1 9.50 usec  
PL1 -0.60 dB  
SFO1 100.6228298 MHz

==== CHANNEL f2 =====  
CPDPRG2 waltz16  
NUC2 1H  
PCPD2 90.00 usec  
PL12 15.60 dB  
PL13 15.60 dB  
PL2 -0.90 dB  
SFO2 400.1316005 MHz

F2 - Processing parameters  
SI 32768  
SF 100.6127538 MHz  
WDW EM  
SSB 0  
LB 1.00 Hz  
GB 0  
PC 1.40

PROTON DMSO {D:\CRR} crr 1

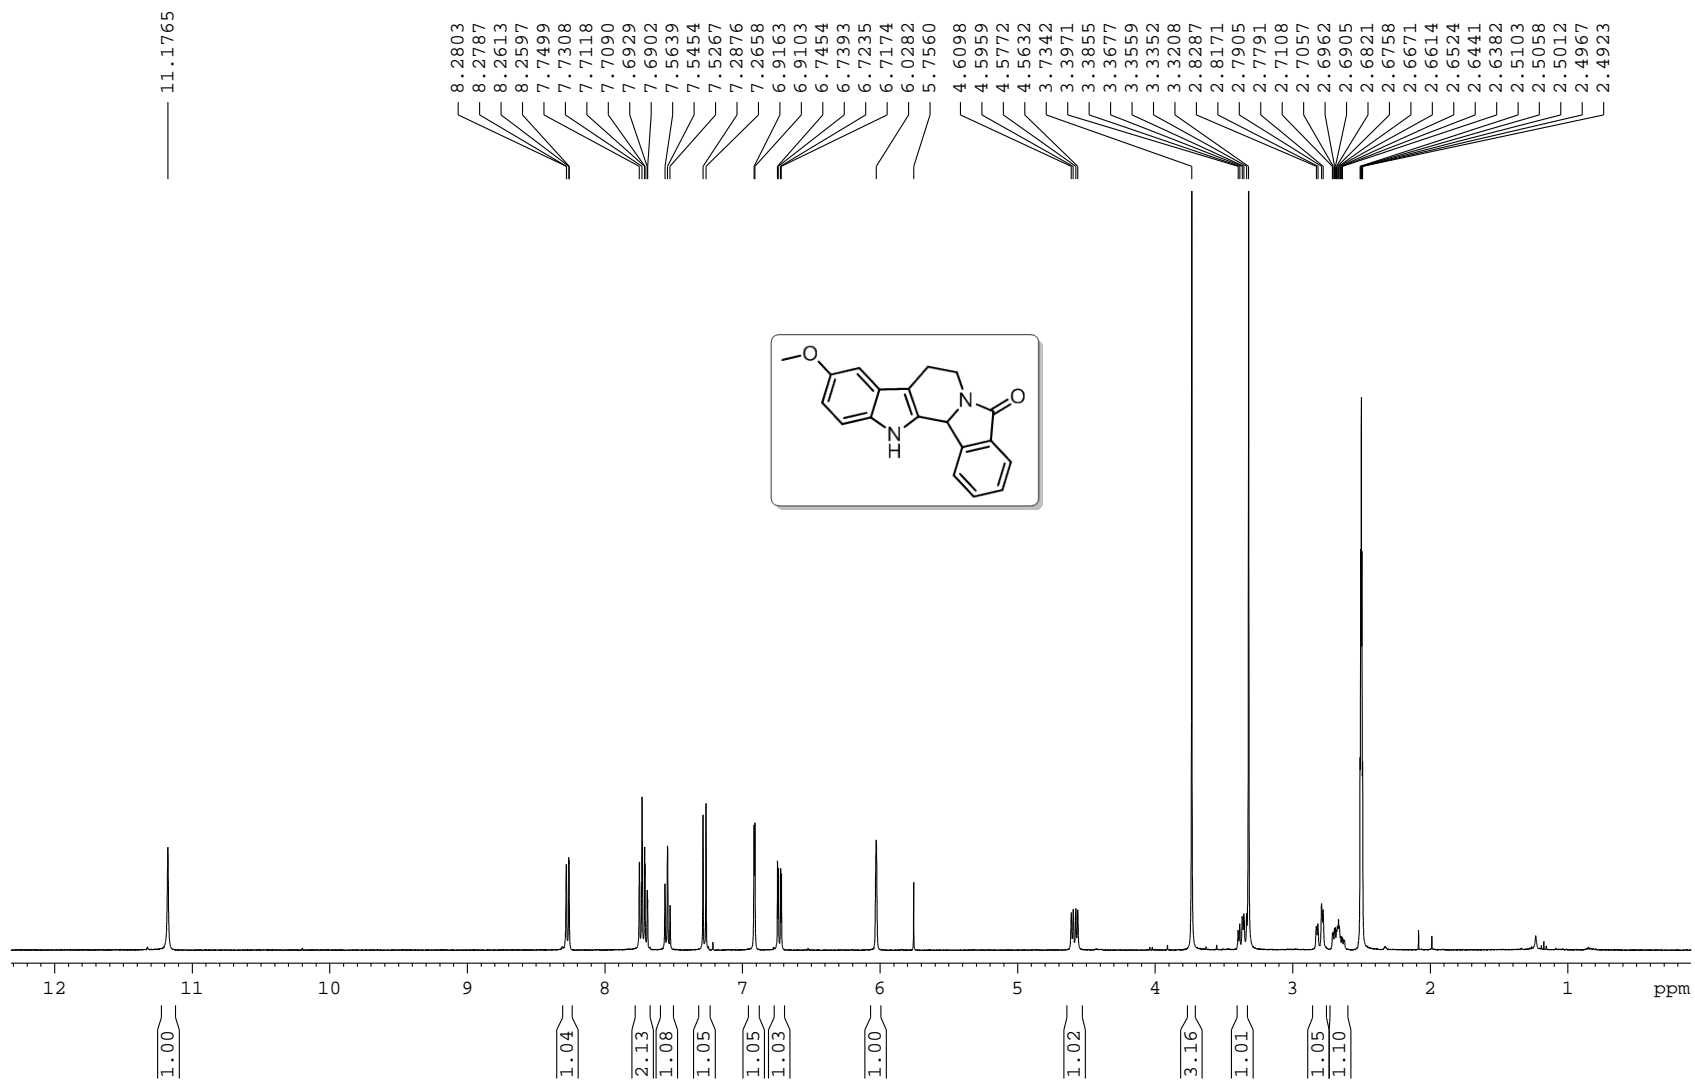



C13CPD DMSO {D:\CRR} KOPAL 1

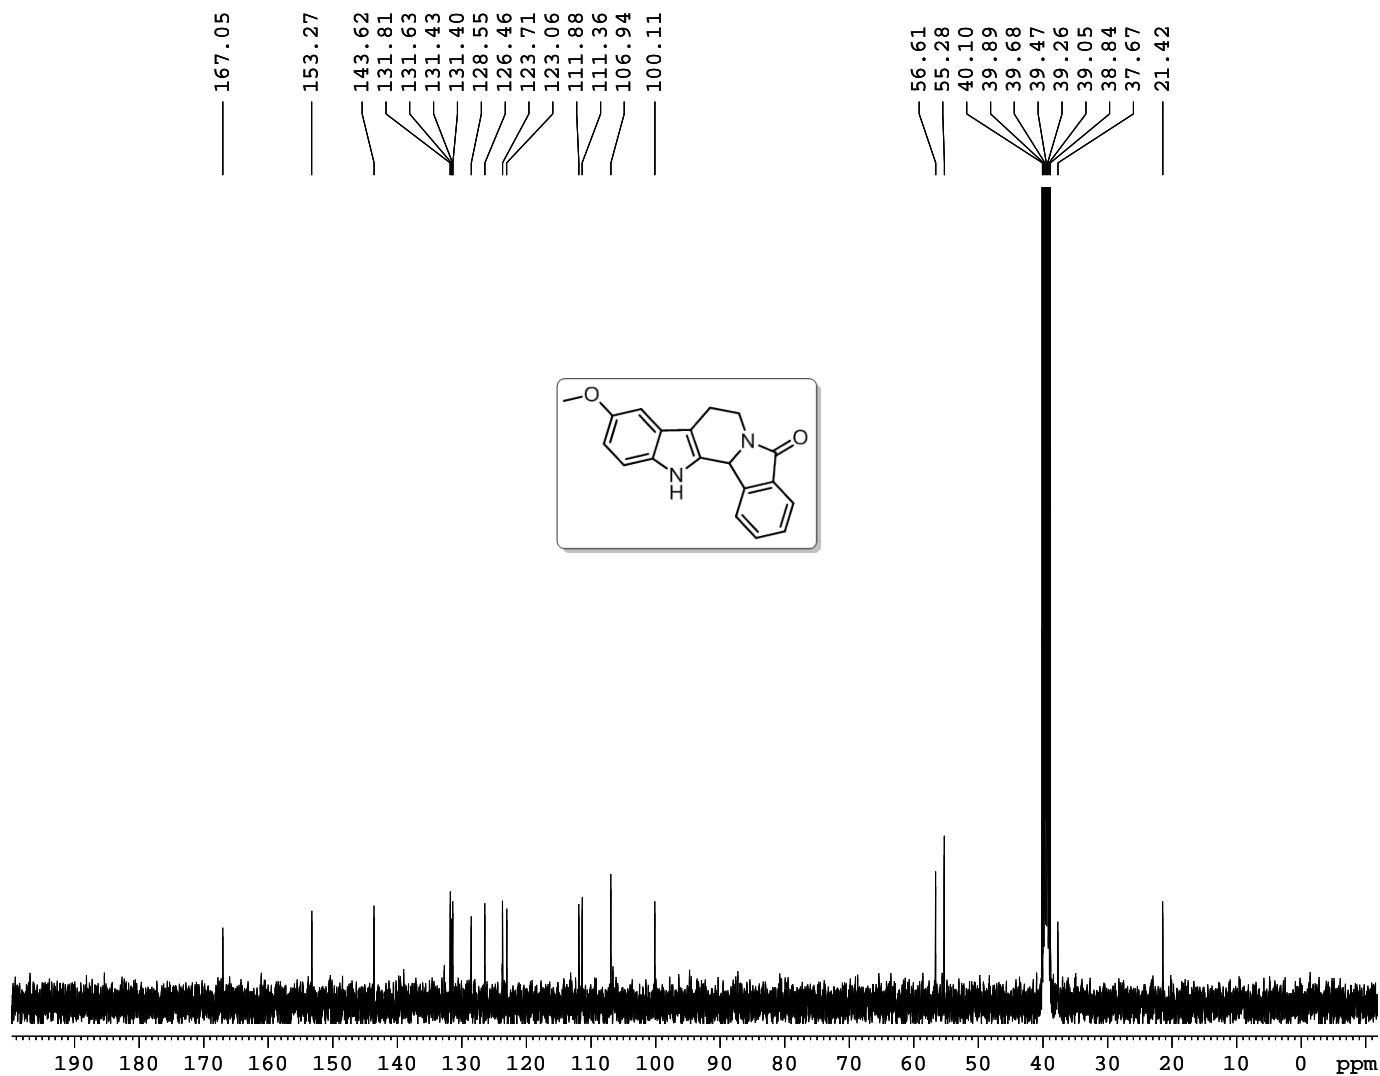

Current Data Parameters  
NAME SMR-I-237-2  
EXPNO 3  
PROCNO 1

F2 - Acquisition Parameters  
Date\_ 20110721  
Time 16.52  
INSTRUM spect  
PROBHD 5 mm BBO BB-1H  
PULPROG zgpg30  
TD 65536  
SOLVENT DMSO  
NS 876  
DS 4  
SWH 24038.461 Hz  
FIDRES 0.366798 Hz  
AQ 1.3631988 sec  
RG 50.8  
DW 20.800 usec  
DE 6.00 usec  
TE 296.8 K  
D1 2.0000000 sec  
d11 0.0300000 sec  
DELTA 1.89999998 sec  
TD0 1

==== CHANNEL f1 =====  
NUC1 13C  
P1 9.50 usec  
PL1 -0.60 dB  
SFO1 100.6228298 MHz

==== CHANNEL f2 =====  
CPDPRG2 waltz16  
NUC2 1H  
PCPD2 90.00 usec  
PL12 15.60 dB  
PL13 15.60 dB  
PL2 -0.90 dB  
SFO2 400.1316005 MHz

F2 - Processing parameters  
SI 32768  
SF 100.6128193 MHz  
WDW EM  
SSB 0  
LB 1.00 Hz  
GB 0  
PC 1.40

S81

PROTON CDC13 {D:\CRR} KOPAL 1

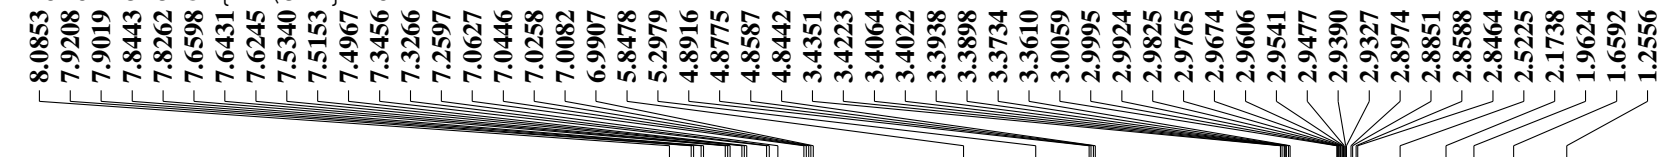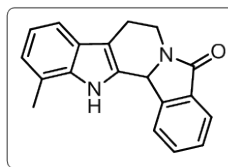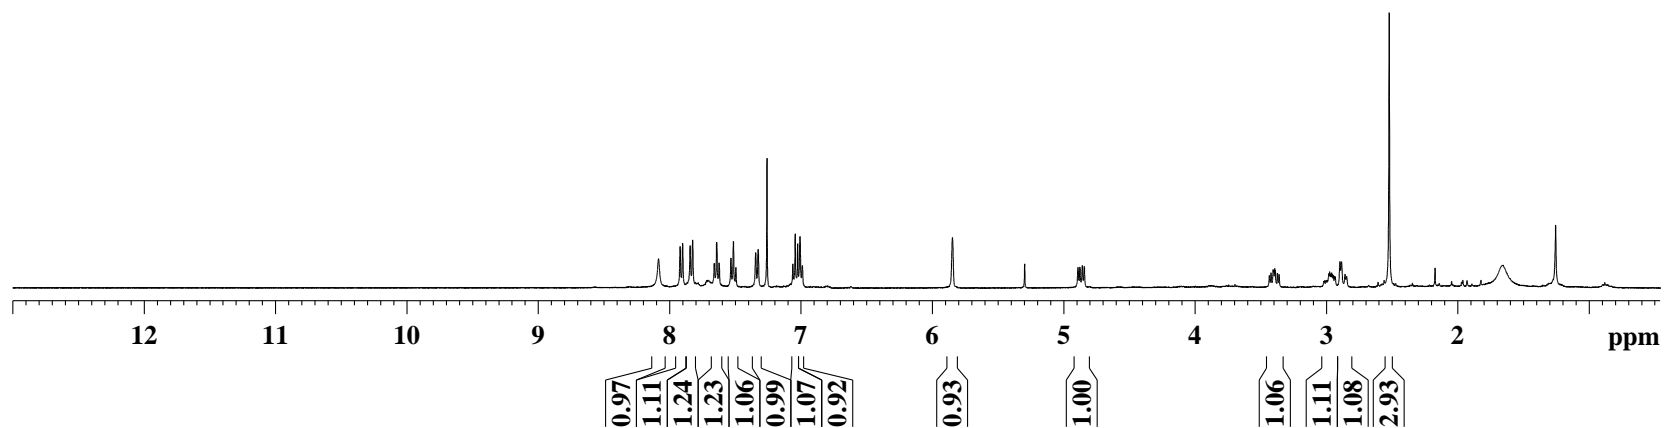

C13CPD CDC13 {D:\CRR} KOPAL 1

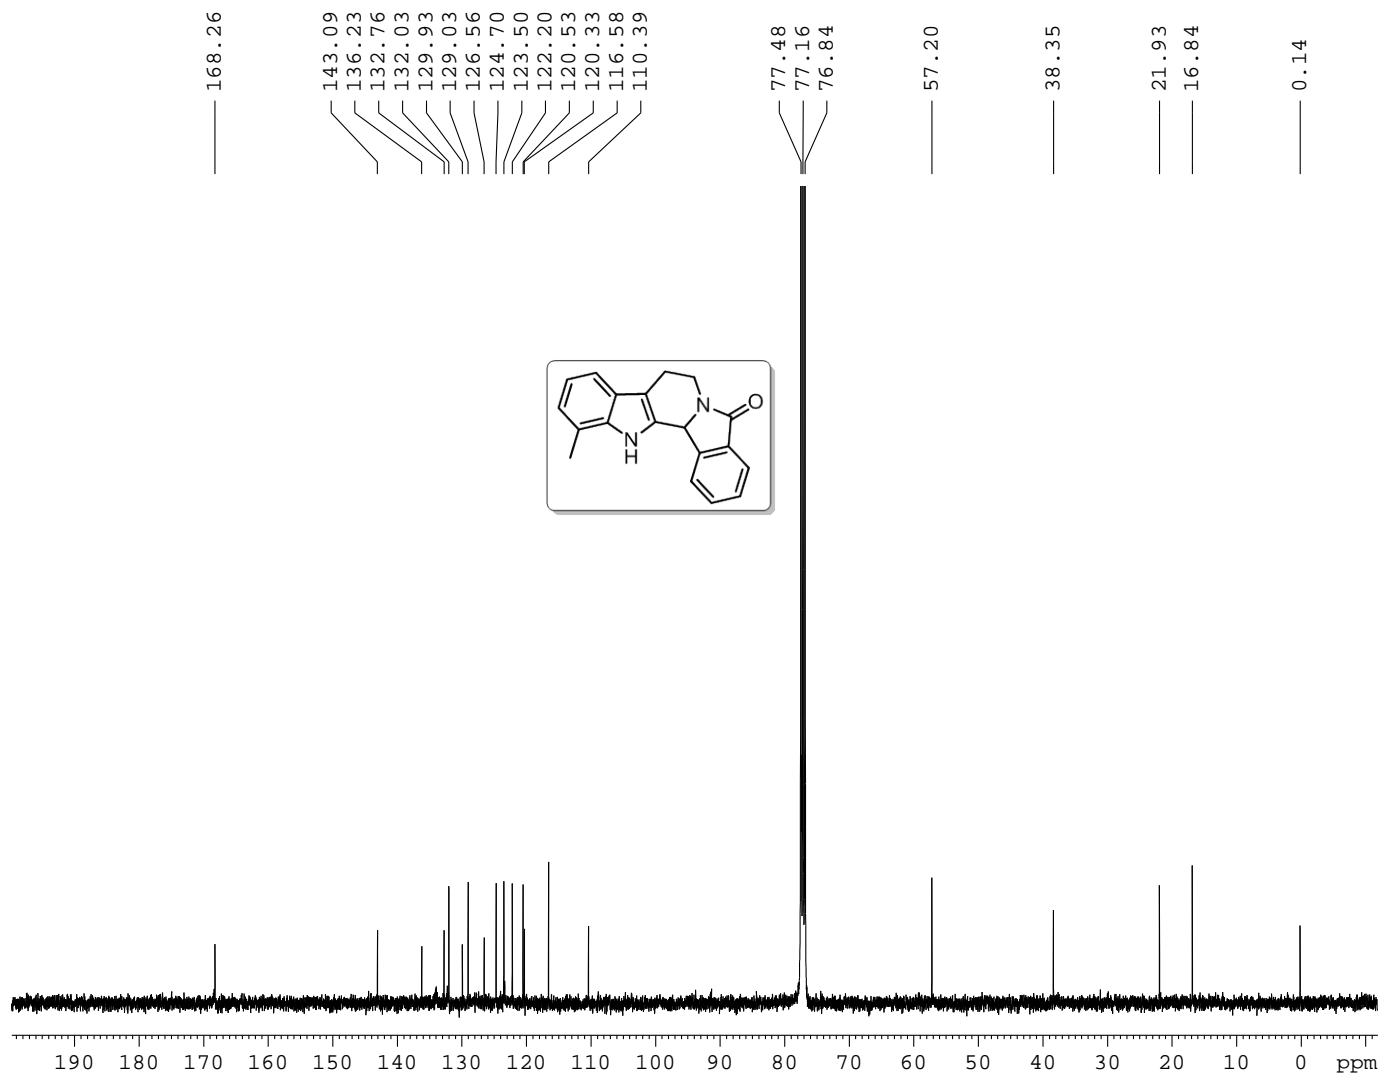

Current Data Parameters  
NAME SMR-OTPh  
EXPNO 1  
PROCNO 1

F2 - Acquisition Parameters  
Date\_ 20120215  
Time 9.24  
INSTRUM spect  
PROBHD 5 mm BBO BB-1H  
PULPROG zgpg30  
TD 65536  
SOLVENT CDC13  
NS 17000  
DS 4  
SWH 24038.461 Hz  
FIDRES 0.366798 Hz  
AQ 1.3631988 sec  
RG 50.8  
DW 20.800 usec  
DE 6.00 usec  
TE 296.8 K  
D1 2.00000000 sec  
d11 0.03000000 sec  
DELTA 1.899999998 sec  
TD0 1

=====  
CHANNEL f1  
NUC1 13C  
P1 9.50 usec  
PL1 -0.60 dB  
SFO1 100.6228298 MHz

=====  
CHANNEL f2  
CPDPRG2 waltz16  
NUC2 1H  
PCPD2 90.00 usec  
PL12 15.60 dB  
PL13 15.60 dB  
PL2 -0.90 dB  
SFO2 400.1316005 MHz

F2 - Processing parameters  
SI 32768  
SF 100.6127525 MHz  
WDW EM  
SSB 0  
LB 1.00 Hz  
GB 0  
PC 1.40

PROTON CDC13 {D:\CRR} KOPAL 1

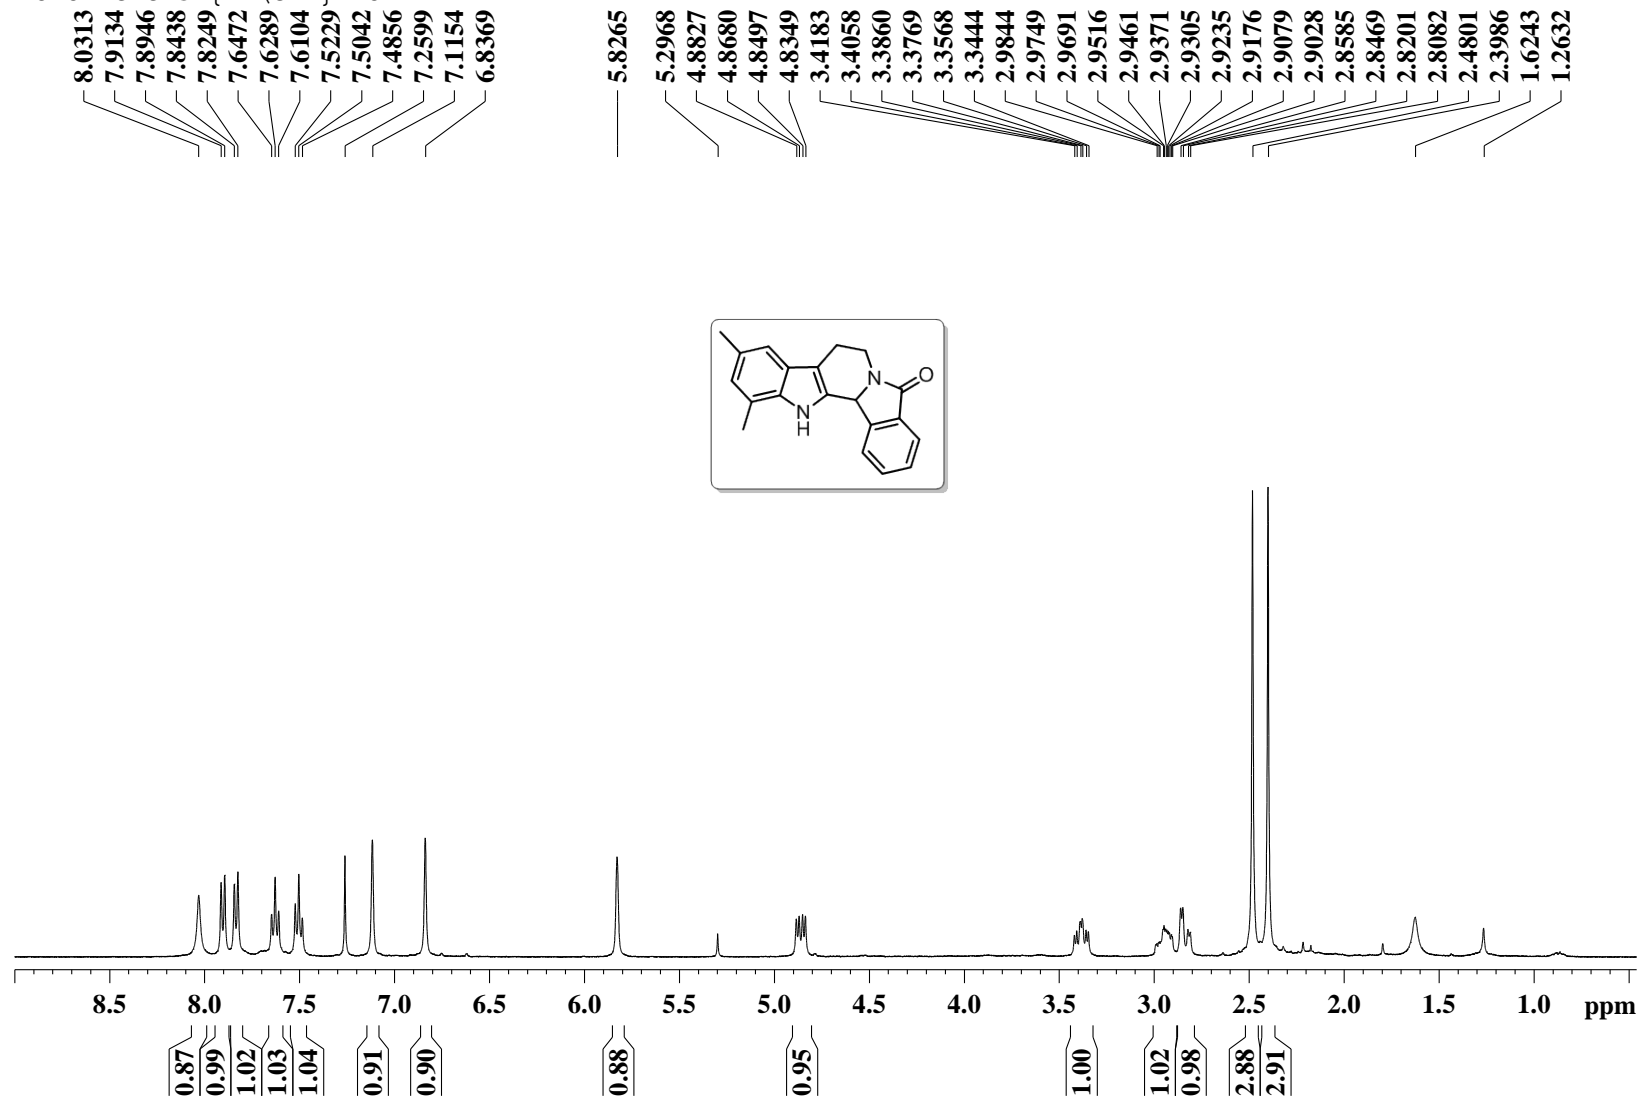

C13CPD CDC13 {D:\CRR} KOPAL 1

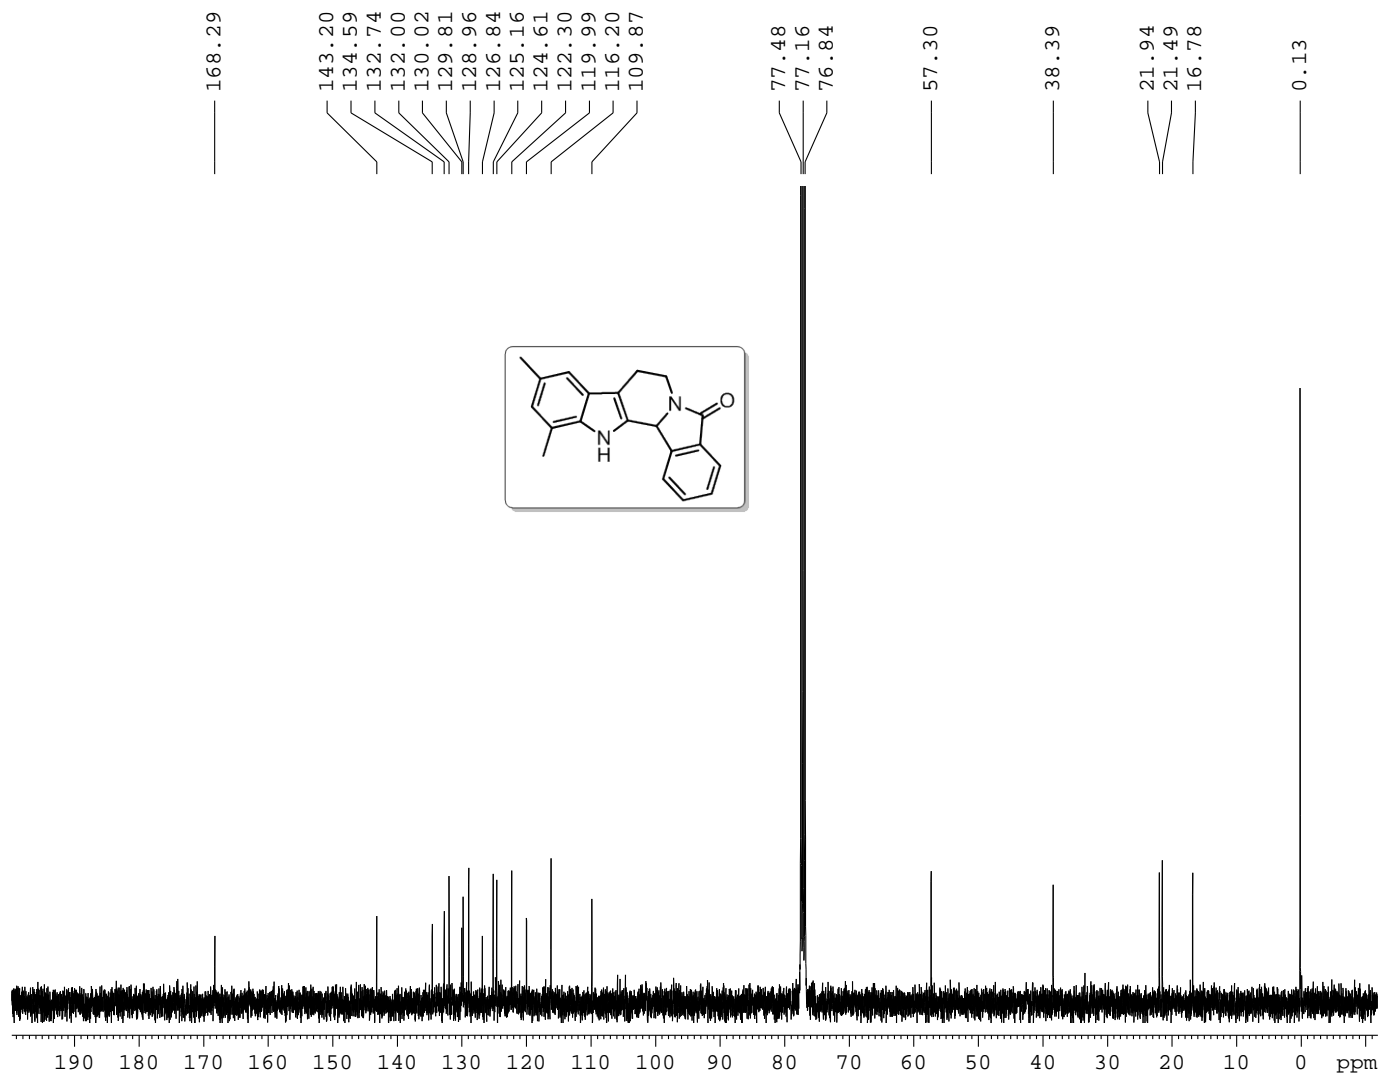

Current Data Parameters  
NAME SMR-I-228-2  
EXPNO 2  
PROCNO 1

F2 - Acquisition Parameters  
Date\_ 20110622  
Time 14.20  
INSTRUM spect  
PROBHD 5 mm BBO BB-1H  
PULPROG zgpg30  
TD 65536  
SOLVENT CDC13  
NS 1024  
DS 4  
SWH 24038.461 Hz  
FIDRES 0.366798 Hz  
AQ 1.3631988 sec  
RG 1620  
DW 20.800 usec  
DE 6.00 usec  
TE 298.8 K  
D1 2.00000000 sec  
d11 0.03000000 sec  
DELTA 1.89999998 sec  
TD0 1

==== CHANNEL f1 =====  
NUC1 13C  
P1 9.50 usec  
PL1 -0.60 dB  
SFO1 100.6228298 MHz

==== CHANNEL f2 =====  
CPDPRG2 waltz16  
NUC2 1H  
PCPD2 90.00 usec  
PL12 15.60 dB  
PL13 15.60 dB  
PL2 -0.90 dB  
SFO2 400.1316005 MHz

F2 - Processing parameters  
SI 32768  
SF 100.6127524 MHz  
WDW EM  
SSB 0  
LB 1.00 Hz  
GB 0  
PC 1.40

PROTON CDC13 {D:\CRR} KOPAL 1

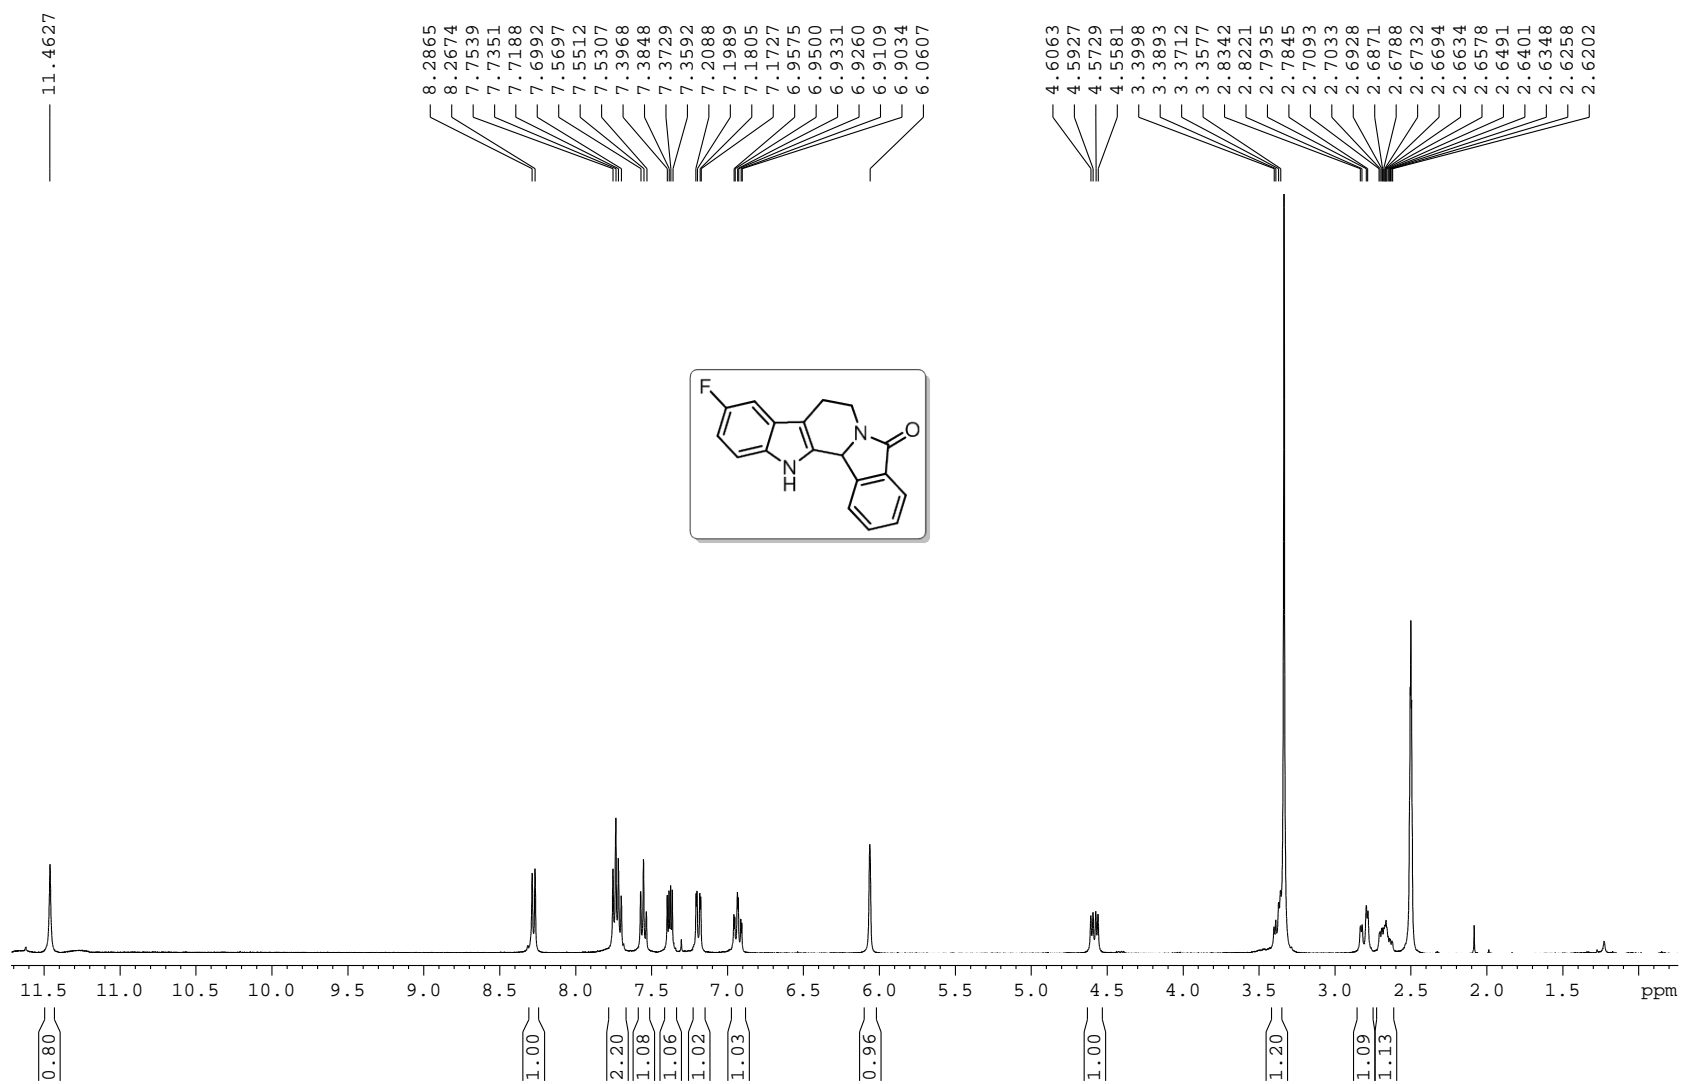

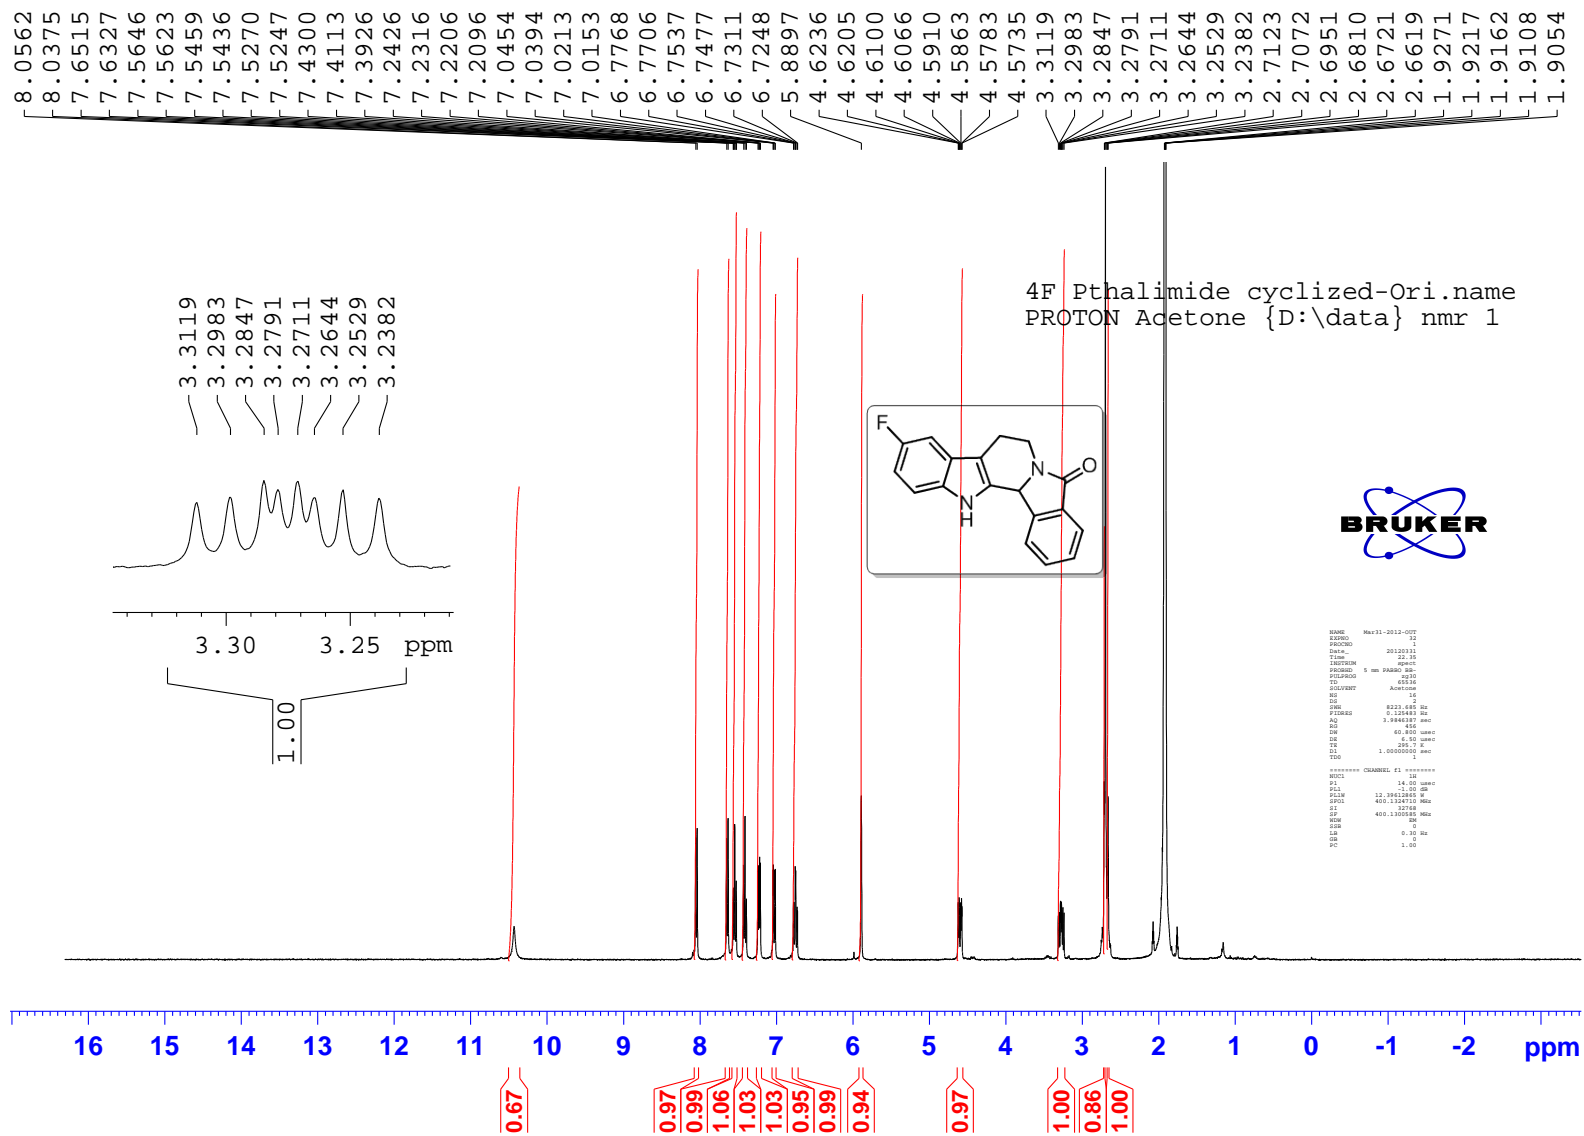

C13CPD DMSO {D:\CRR} KOPAL 1

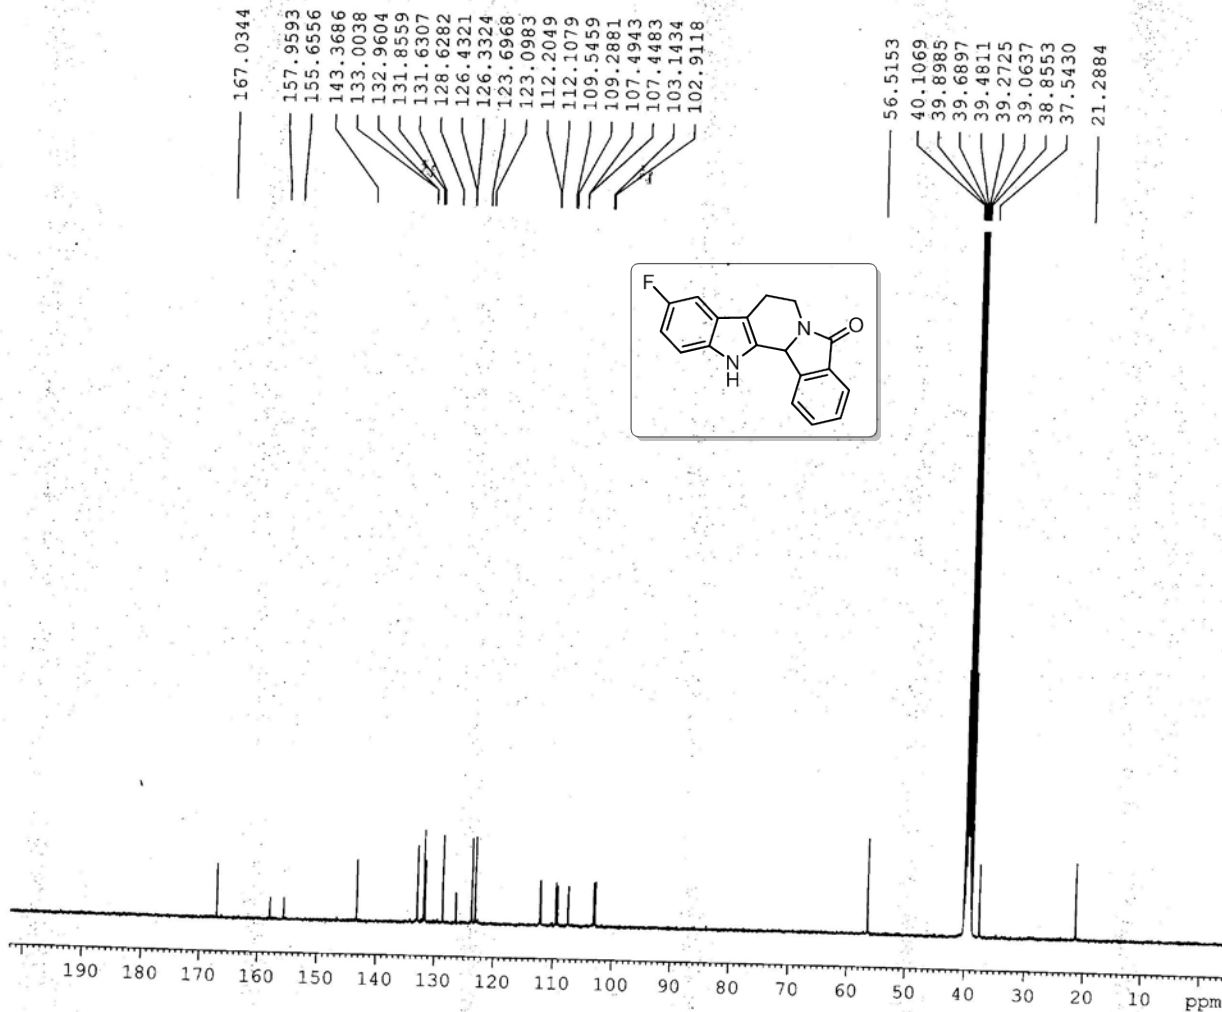

167.0344  
157.9593  
155.6556  
143.3686  
133.0038  
132.9604  
131.8559  
131.6307  
128.6282  
126.4321  
126.3324  
123.6968  
123.0983  
112.2049  
112.1079  
109.5459  
109.2881  
107.4943  
107.4483  
103.1434  
102.9118  
56.5153  
40.1069  
39.8985  
39.6897  
39.4811  
39.2725  
39.0637  
38.8553  
37.5430  
21.2884

Current Data Parameters  
NAME SMR-4FFh  
EXENO 1  
PROCNO 1

F2 - Acquisition Parameters  
Date 20120126  
Time 9.52  
INSTRUM spect  
PROBHD 5 mm BBO BB-1H  
PULPROG zgpg30  
TD 65536  
SOLVENT DMSO  
DS 17000  
NS 4  
SWH 24038.461 Hz  
FIDRES 0.366798 Hz  
AQ 1.3631988 sec  
RG 50.8  
DW 20.800 usec  
DE 6.00 usec  
TE 298.5 K  
D1 2.00000000 sec  
d11 0.03000000 sec  
DELTA 1.89999998 sec  
TDO 1

==== CHANNEL f1 =====  
NUC1 13C  
P1 9.50 usec  
PL1 -0.60 dB  
SFO1 100.6228298 MHz

==== CHANNEL f2 =====  
CPDPRG2 waltz16  
NUC2 1H  
PCPD2 90.00 usec  
PL12 15.60 dB  
PL13 15.60 dB  
PL2 -0.90 dB  
SFO2 400.1316005 MHz

F2 - Processing parameters  
SI 32768  
SF 100.6128193 MHz  
WDW EM  
SSB 0  
LB 1.00 Hz  
GB 0  
PC 1.40



PROTON DMSO {D:\CRR} KOPAL 1

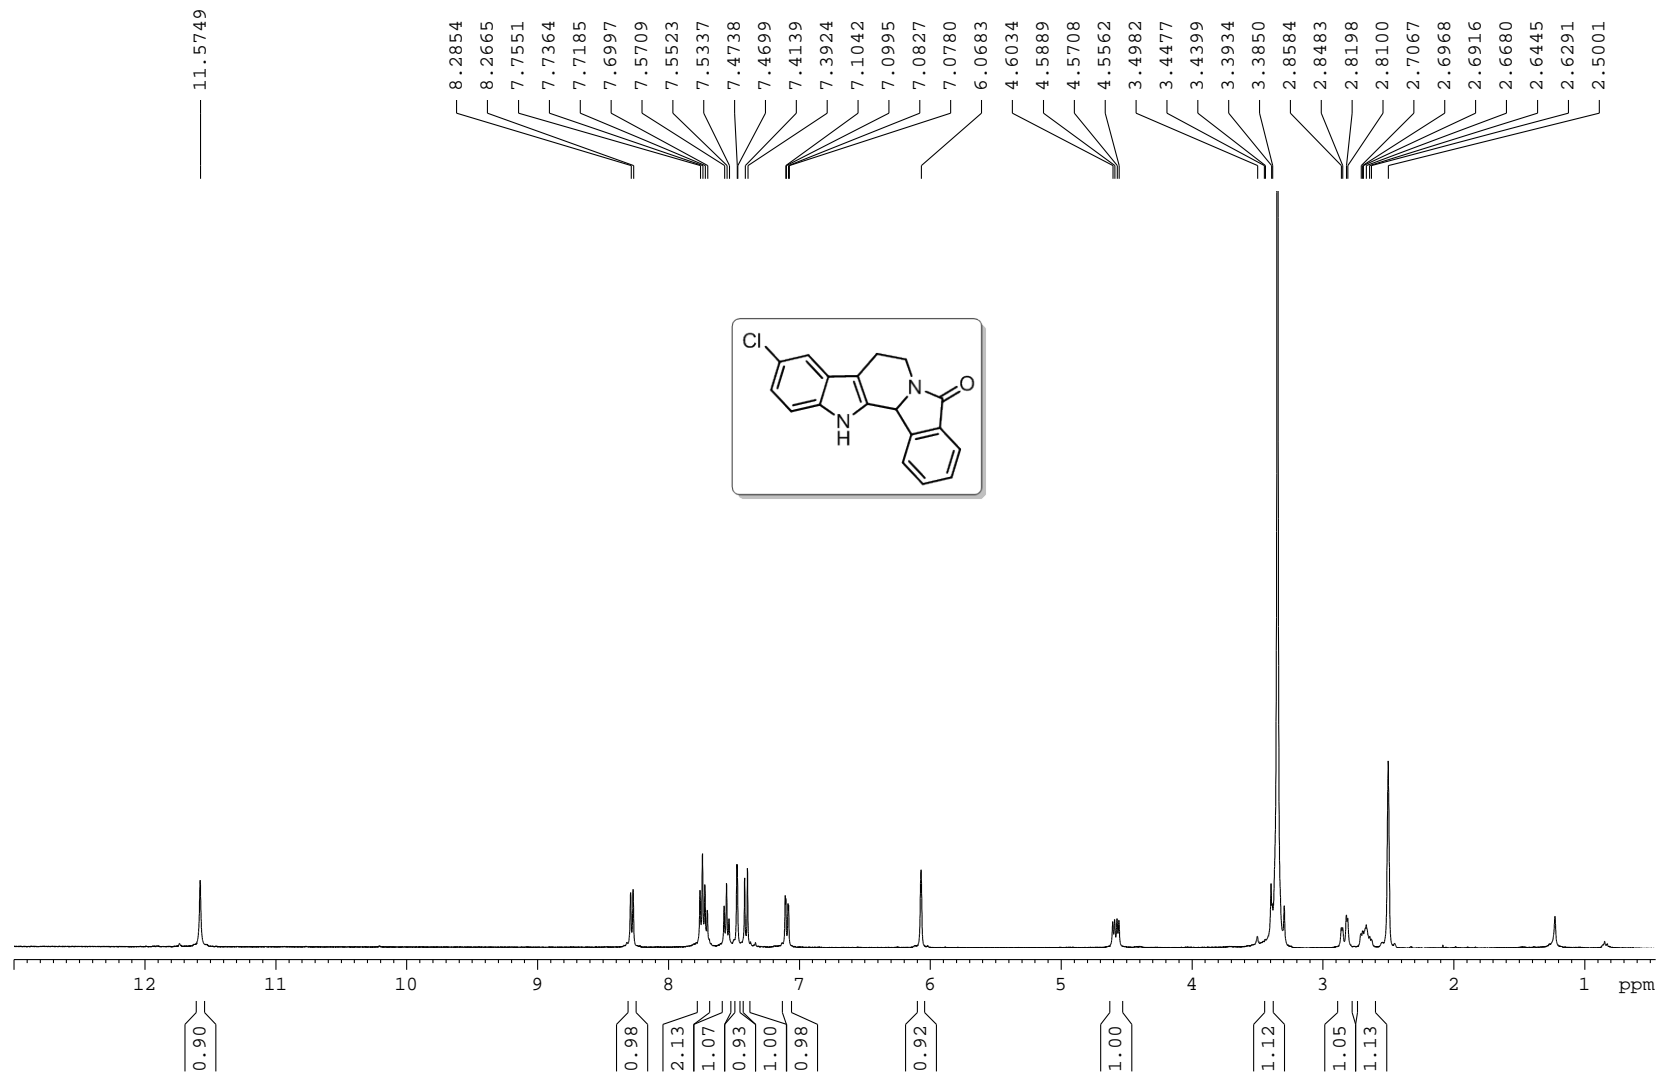

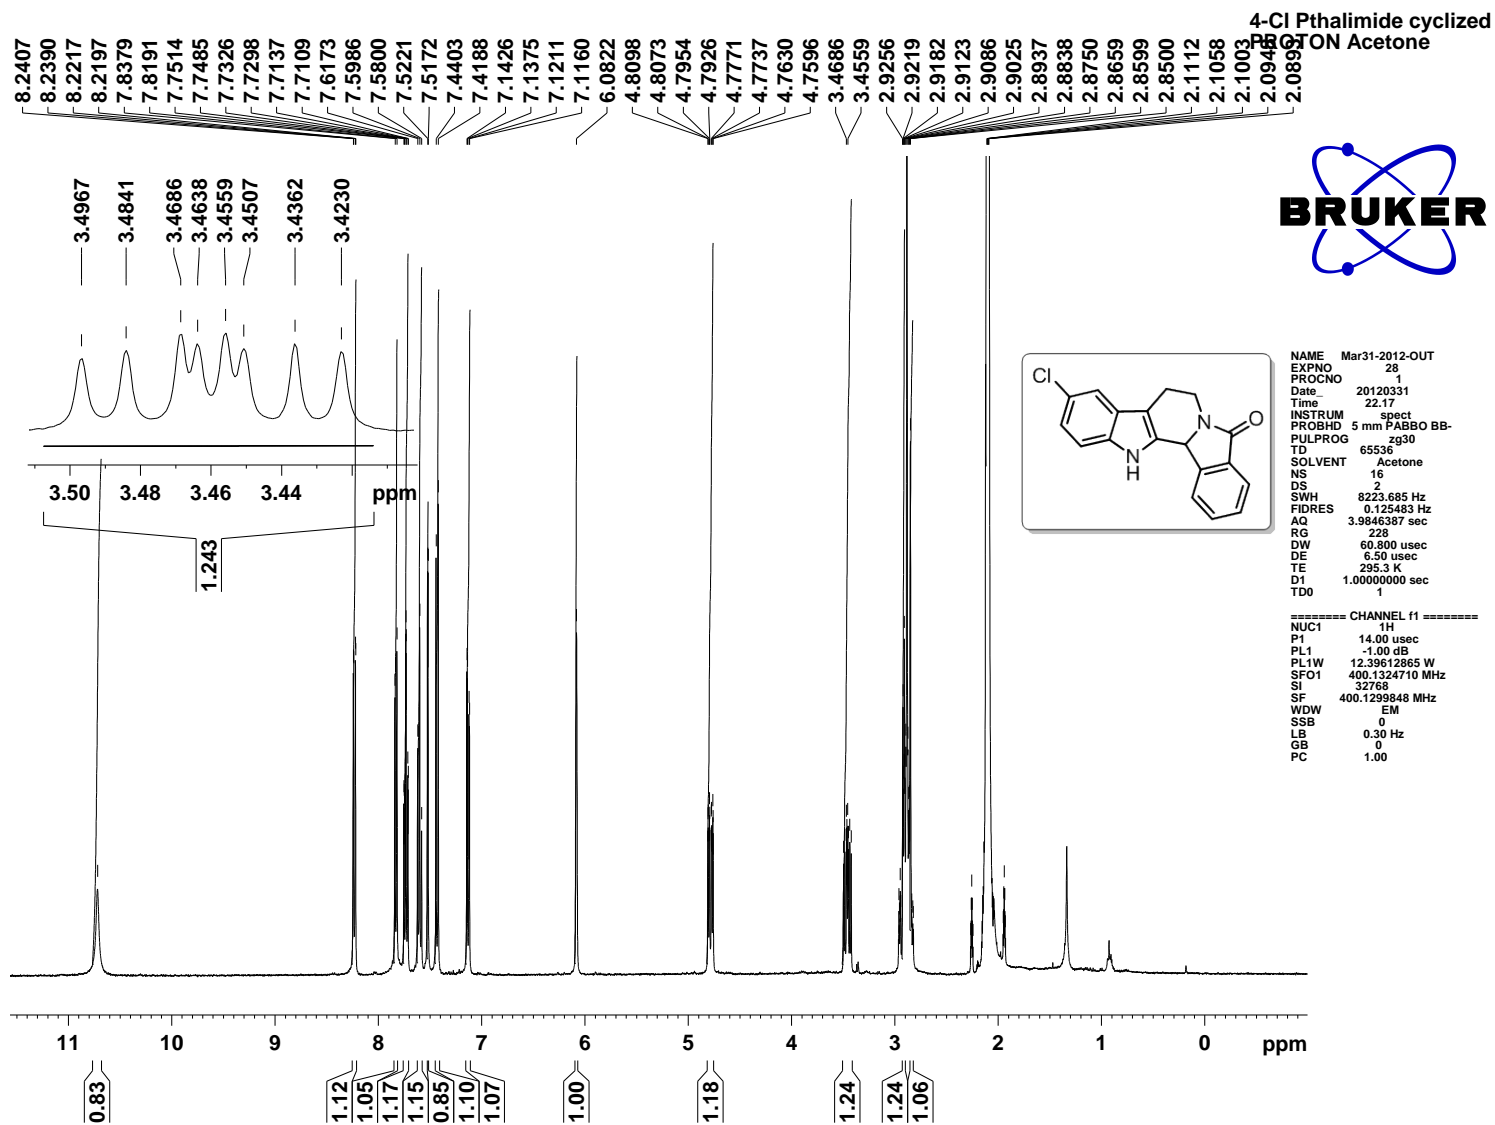

C13CPD DMSO {D:\CRR} KOPAL 1

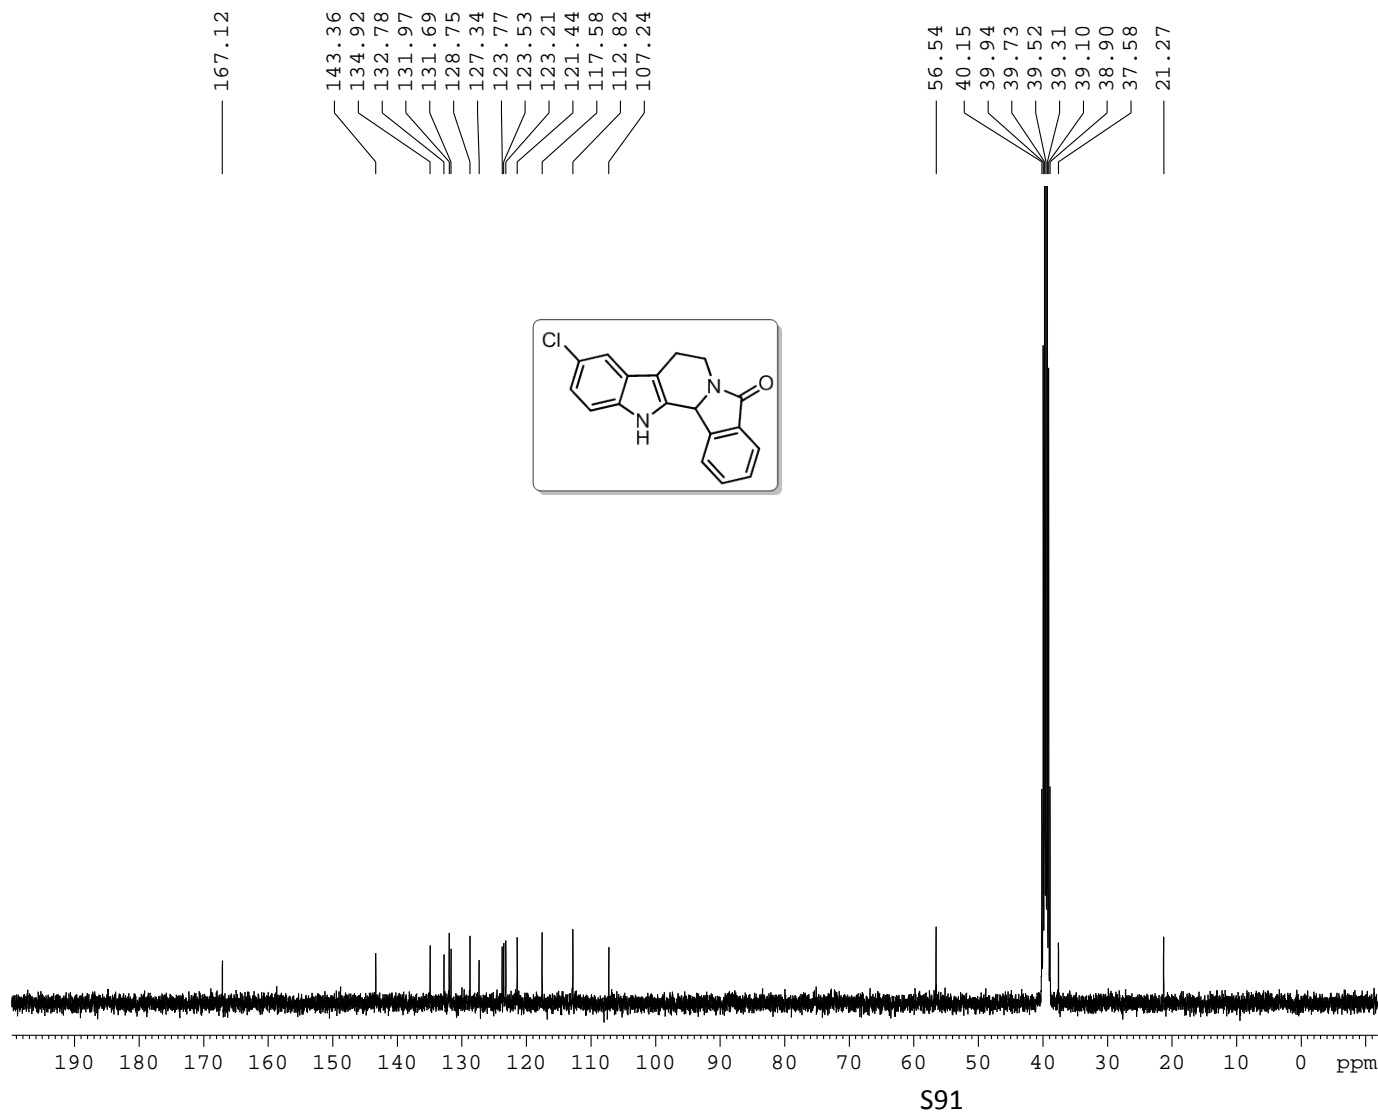

Current Data Parameters  
NAME SMR-I-214-2  
EXPNO 2  
PROCNO 1

F2 - Acquisition Parameters  
Date\_ 20110525  
Time 12.02  
INSTRUM spect  
PROBHD 5 mm BBO BB-1H  
PULPROG zgpg30  
TD 65536  
SOLVENT DMSO  
NS 512  
DS 4  
SWH 24038.461 Hz  
FIDRES 0.366798 Hz  
AQ 1.3631988 sec  
RG 50.8  
DW 20.800 usec  
DE 6.00 usec  
TE 296.2 K  
D1 2.00000000 sec  
d11 0.03000000 sec  
DELTA 1.89999998 sec  
TD0 1

==== CHANNEL f1 =====  
NUC1 13C  
P1 9.50 usec  
PL1 -0.60 dB  
SFO1 100.6228298 MHz

==== CHANNEL f2 =====  
CPDPRG2 waltz16  
NUC2 1H  
PCPD2 90.00 usec  
PL12 15.60 dB  
PL13 15.60 dB  
PL2 -0.90 dB  
SFO2 400.1316005 MHz

F2 - Processing parameters  
SI 32768  
SF 100.6128109 MHz  
WDW EM  
SSB 0  
LB 1.00 Hz  
GB 0  
PC 1.40

PROTON DMSO {D:\CRR} KOPAL 1

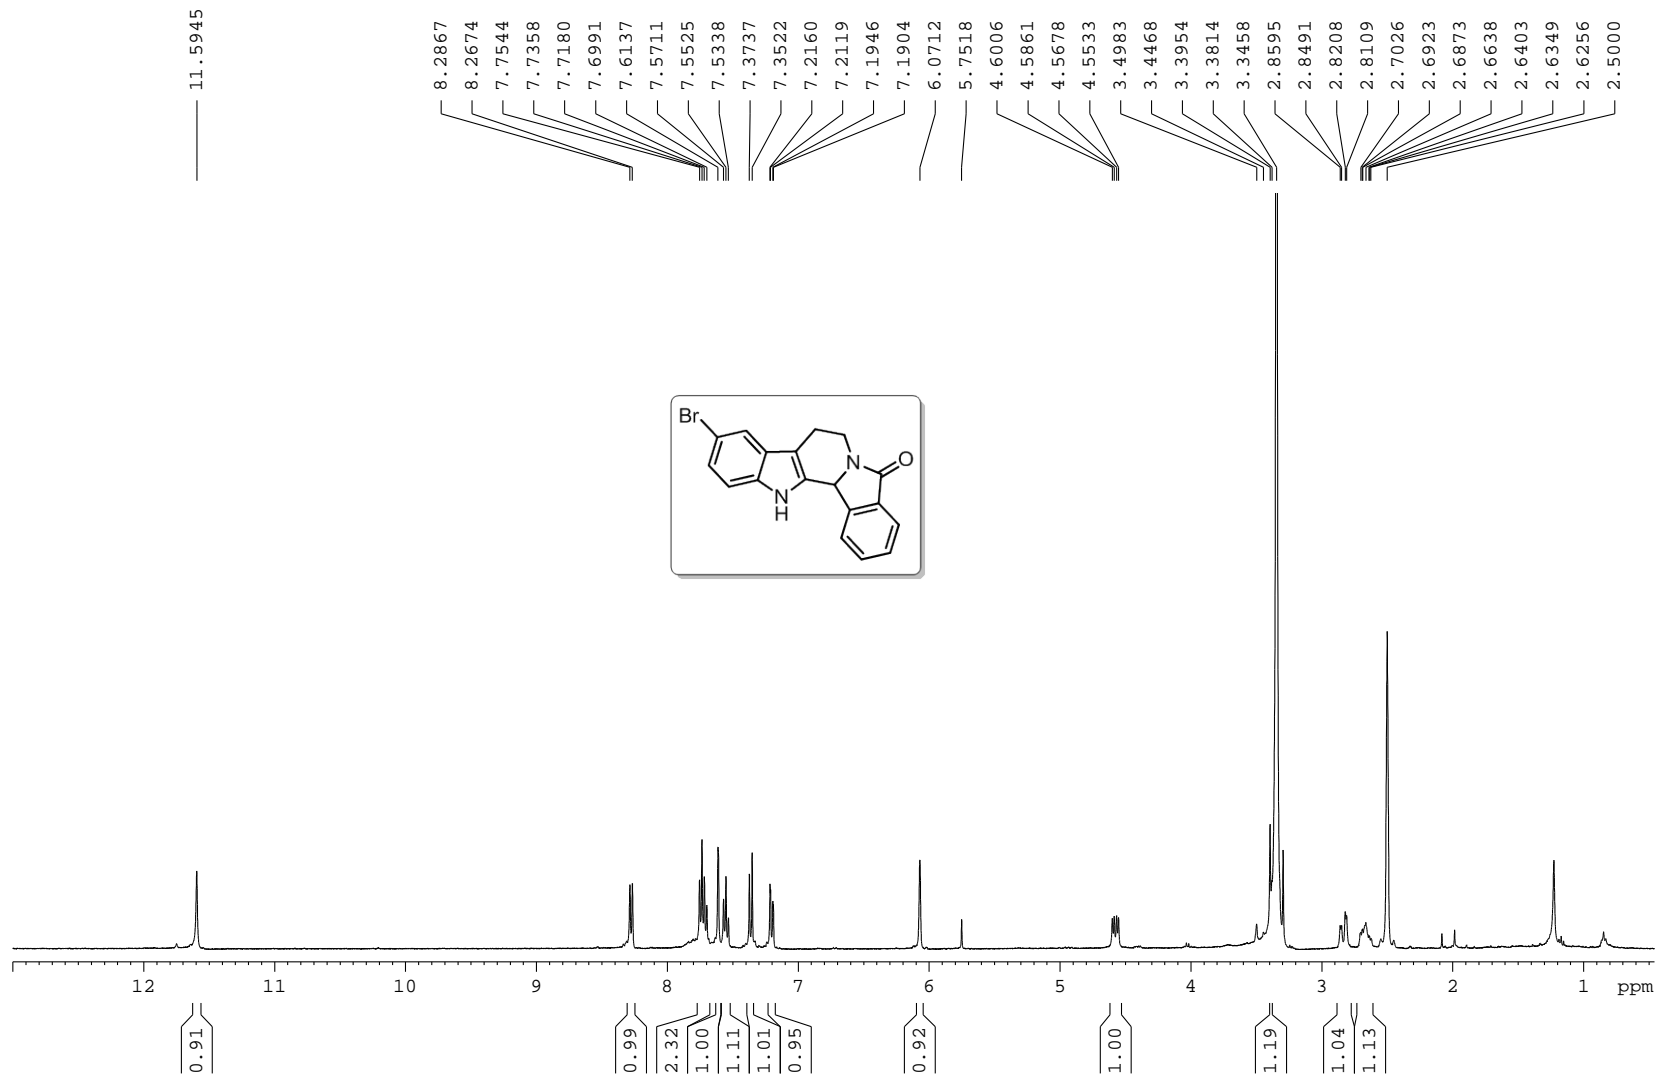

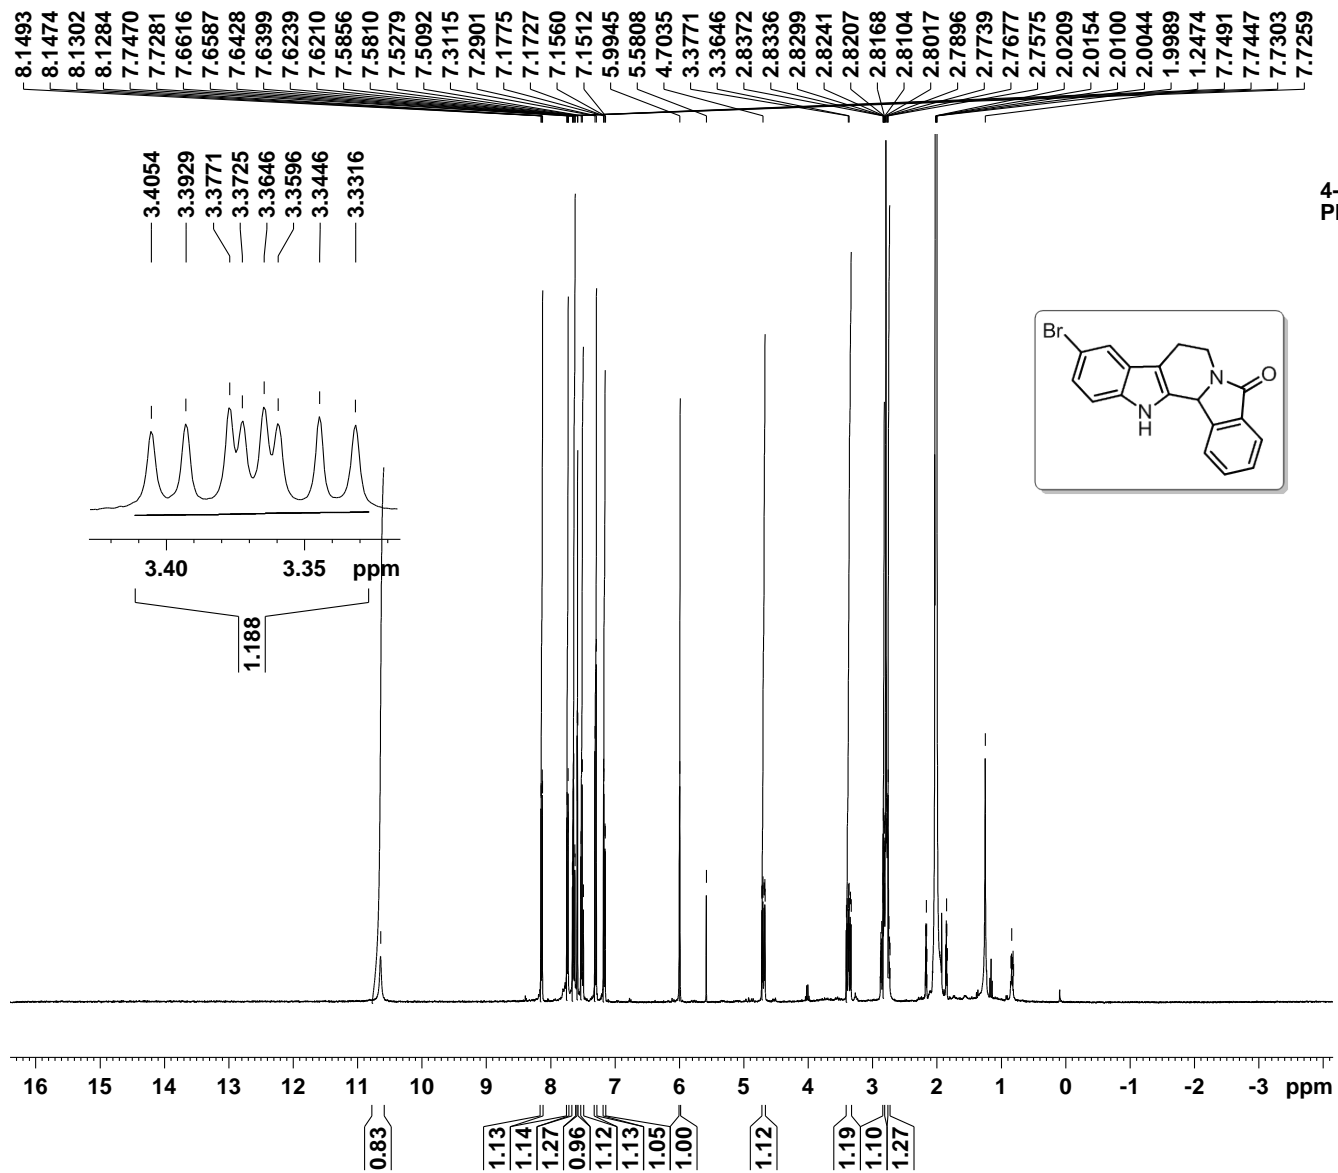

4-Br Pthalimide cyclized  
PROTON Acetone

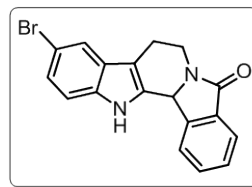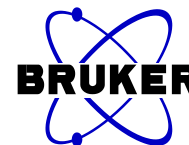

NAME Mar31-2012-OUT  
EXPNO 26  
PROCNO 1  
Date\_ 20120331  
Time 22:10  
INSTRUM spect  
PROBHD 5 mm PABBO BB-  
PULPROG zg30  
TD 65536  
SOLVENT Acetone  
NS 16  
DS 2  
SWH 8223.685 Hz  
FIDRES 0.125483 Hz  
AQ 3.9846387 sec  
RG 228  
DW 60.800 usec  
DE 6.50 usec  
TE 294.7 K  
D1 1.00000000 sec  
TD0 1

===== CHANNEL f1 =====  
NUC1 1H  
P1 14.00 usec  
PL1 -1.00 dB  
PL1W 12.39612965 W  
SFO1 400.1324710 MHz  
SI 32768  
SF 400.1300210 MHz  
WDW EM  
SSB 0  
LB 0.30 Hz  
GB 0  
PC 1.00

C13CPD DMSO {D:\CRR} KOPAL 1

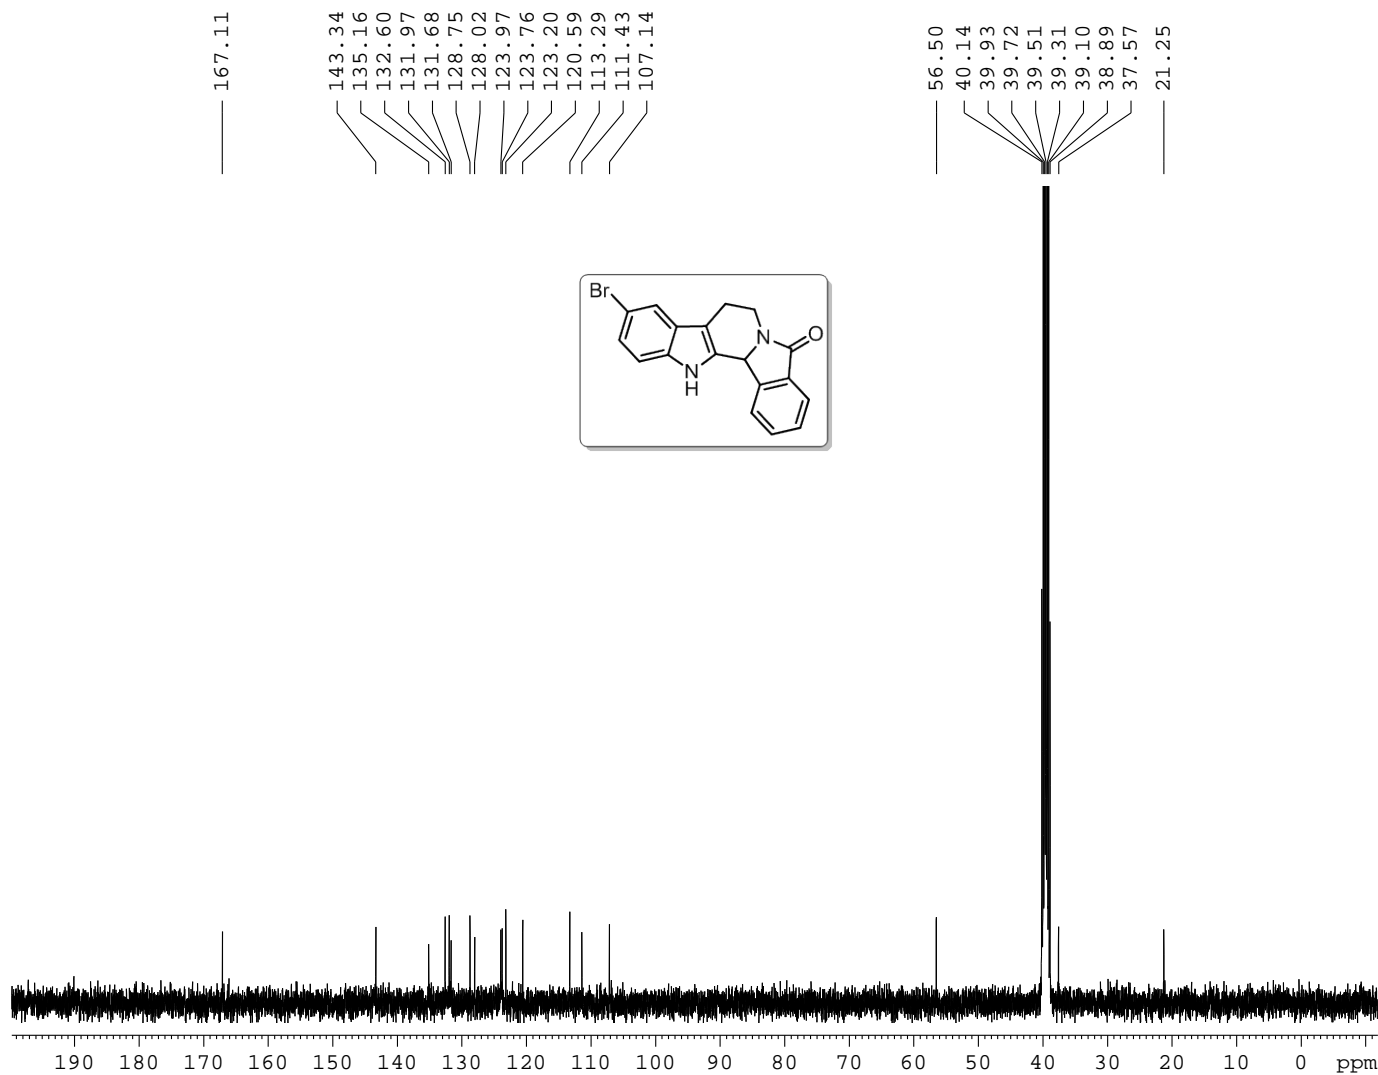

Current Data Parameters  
NAME SMR-I-215-2  
EXPNO 2  
PROCNO 1

F2 - Acquisition Parameters  
Date\_ 20110525  
Time 12.57  
INSTRUM spect  
PROBHD 5 mm BBO BB-1H  
PULPROG zgpg30  
TD 65536  
SOLVENT DMSO  
NS 512  
DS 4  
SWH 24038.461 Hz  
FIDRES 0.366798 Hz  
AQ 1.3631988 sec  
RG 50.8  
DW 20.800 usec  
DE 6.00 usec  
TE 295.7 K  
D1 2.00000000 sec  
d11 0.03000000 sec  
DELTA 1.89999998 sec  
TD0 1

==== CHANNEL f1 =====  
NUC1 13C  
P1 9.50 usec  
PL1 -0.60 dB  
SFO1 100.6228298 MHz

==== CHANNEL f2 =====  
CPDPRG2 waltz16  
NUC2 1H  
PCPD2 90.00 usec  
PL12 15.60 dB  
PL13 15.60 dB  
PL2 -0.90 dB  
SFO2 400.1316005 MHz

F2 - Processing parameters  
SI 32768  
SF 100.6128121 MHz  
WDW EM  
SSB 0  
LB 1.00 Hz  
GB 0  
PC 1.40

S94

PROTON DMSO {D:\CRR} KOPAL 1

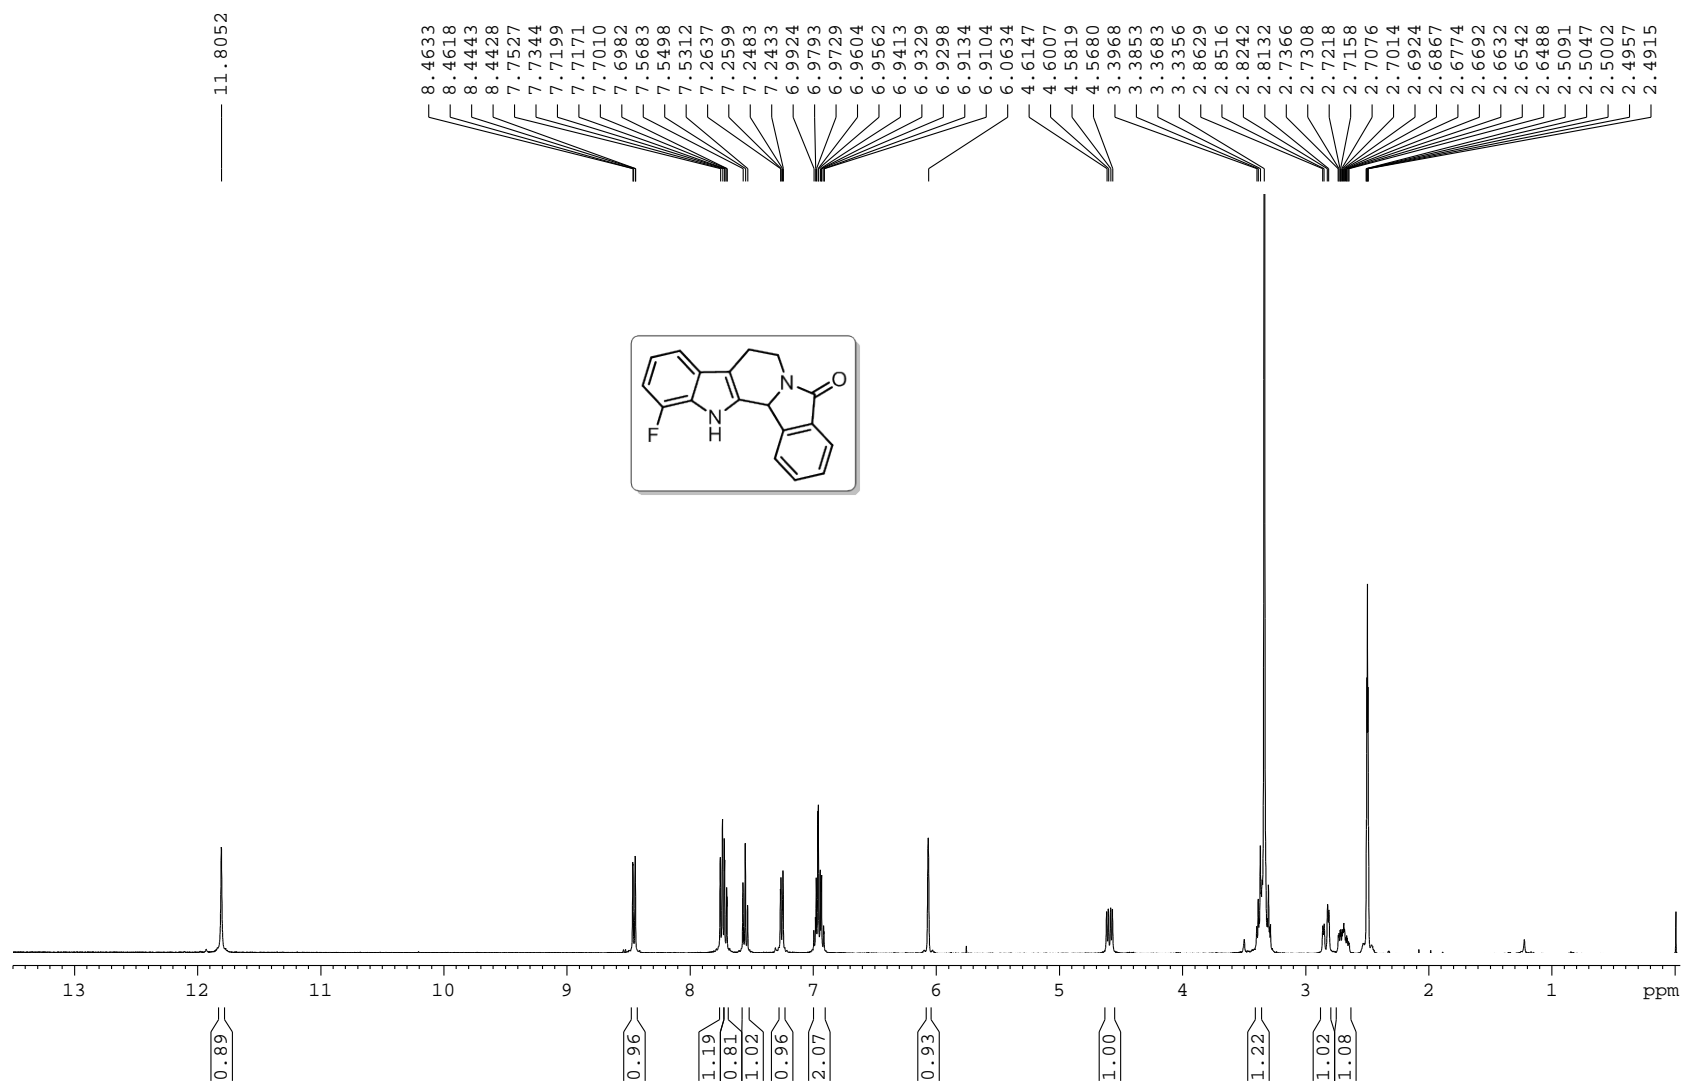

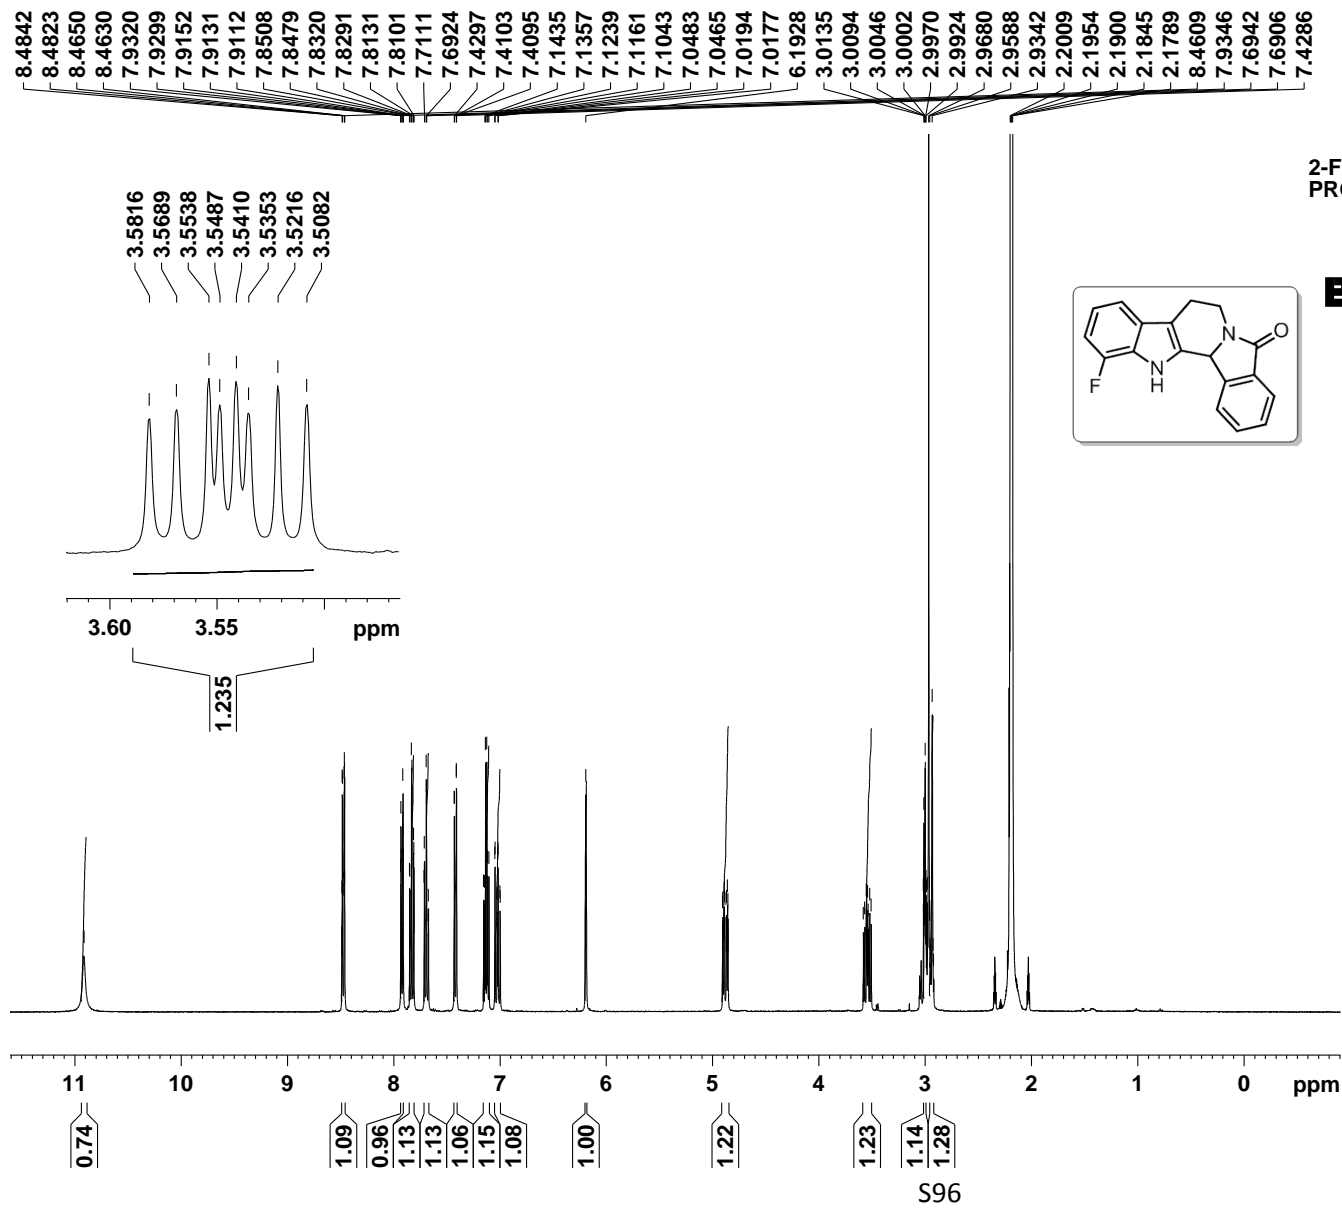



C13CPD DMSO {D:\CRR} KOPAL 1

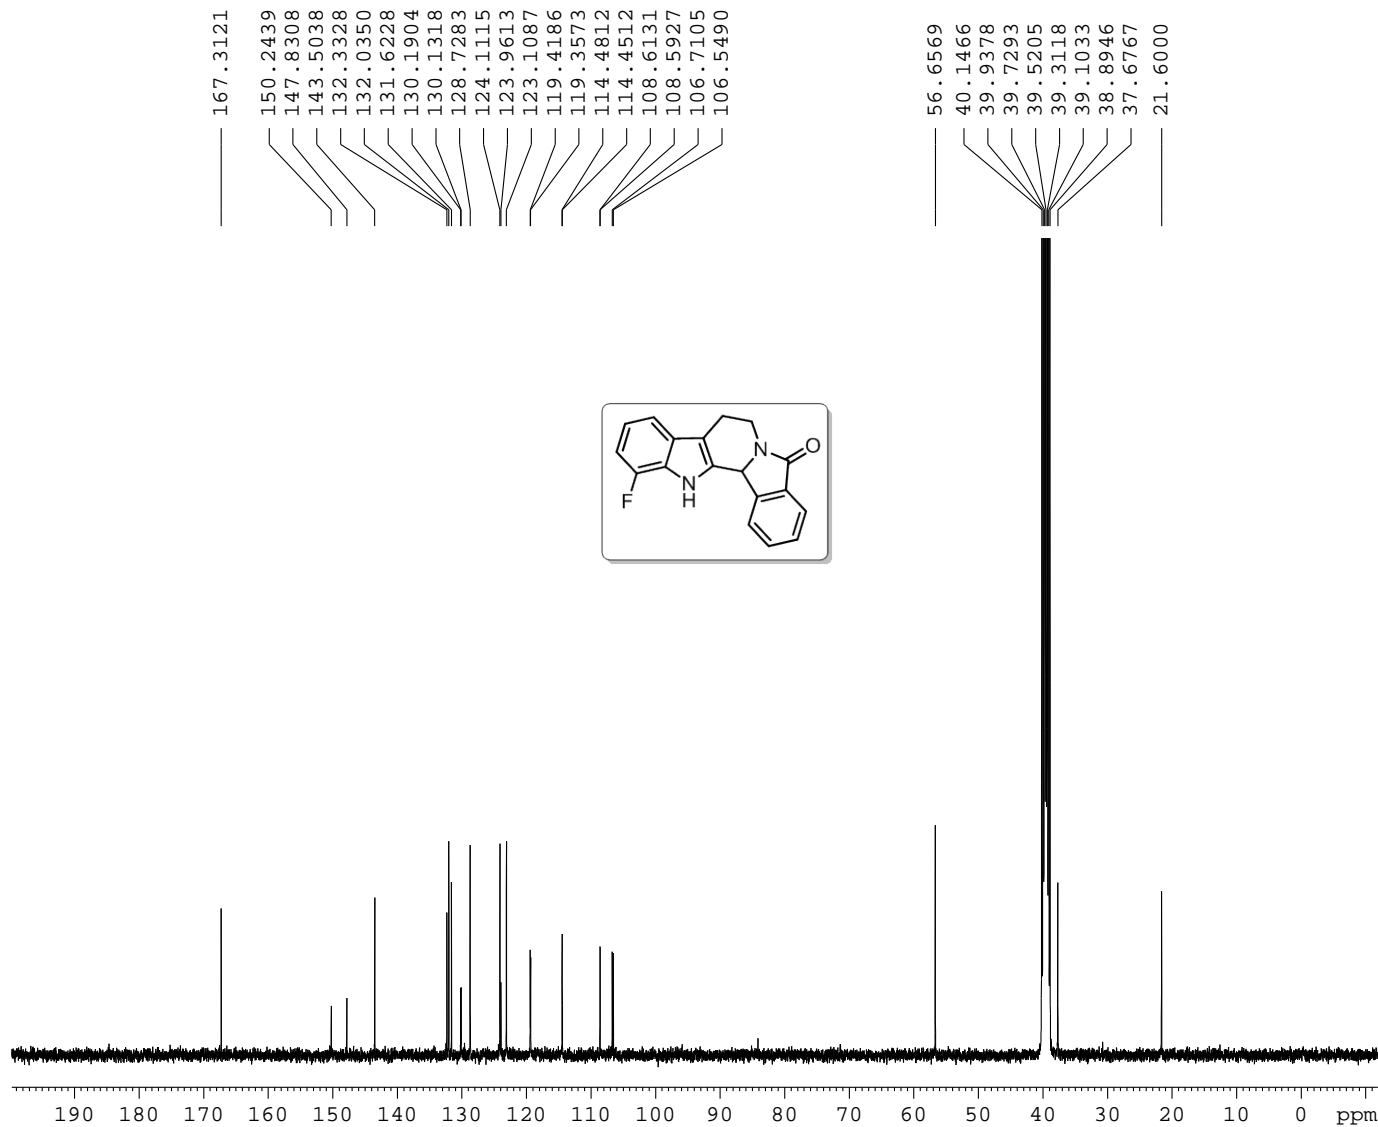

Current Data Parameters  
NAME SMR-BETCAR  
EXPNO 1  
PROCNO 1

F2 - Acquisition Parameters  
Date\_ 20120112  
Time 9.30  
INSTRUM spect  
PROBHD 5 mm BBO BB-1H  
PULPROG zgpg30  
TD 65536  
SOLVENT DMSO  
NS 17000  
DS 4  
SWH 24038.461 Hz  
FIDRES 0.366798 Hz  
AQ 1.3631988 sec  
RG 50.8  
DW 20.800 usec  
DE 6.00 usec  
TE 293.9 K  
D1 2.00000000 sec  
d11 0.03000000 sec  
DELTA 1.89999998 sec  
TD0 1

==== CHANNEL f1 =====  
NUC1 13C  
P1 9.50 usec  
PL1 -0.60 dB  
SFO1 100.6228298 MHz

==== CHANNEL f2 =====  
CPDPRG2 waltz16  
NUC2 1H  
PCPD2 90.00 usec  
PL12 15.60 dB  
PL13 15.60 dB  
PL2 -0.90 dB  
SFO2 400.1316005 MHz

F2 - Processing parameters  
SI 32768  
SF 100.6128113 MHz  
WDW EM  
SSB 0  
LB 1.00 Hz  
GB 0  
PC 1.40

PROTON CDC13 {D:\CRR} KOPAL 1

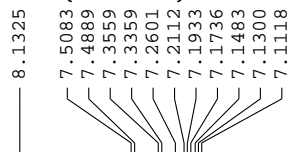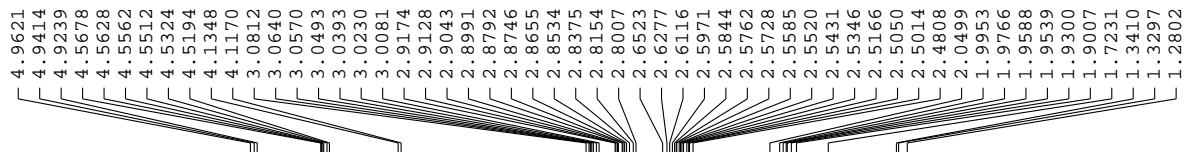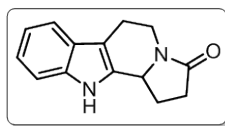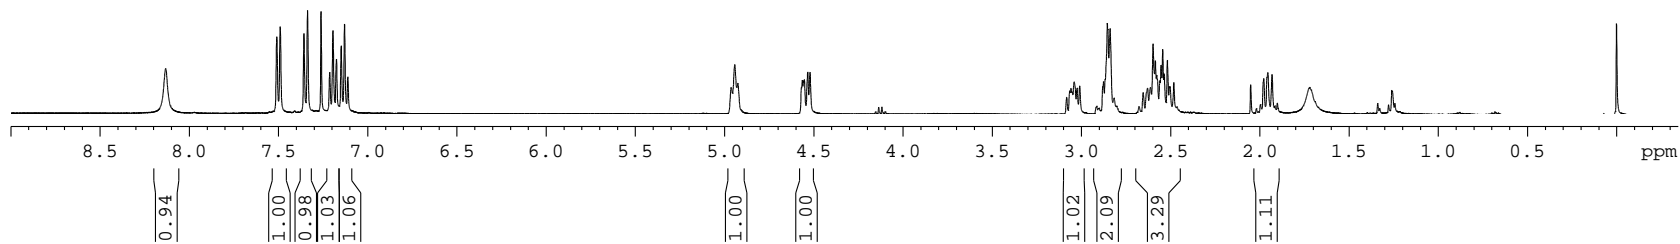

C13CPD CDC13 {D:\CRR} KOPAL 1

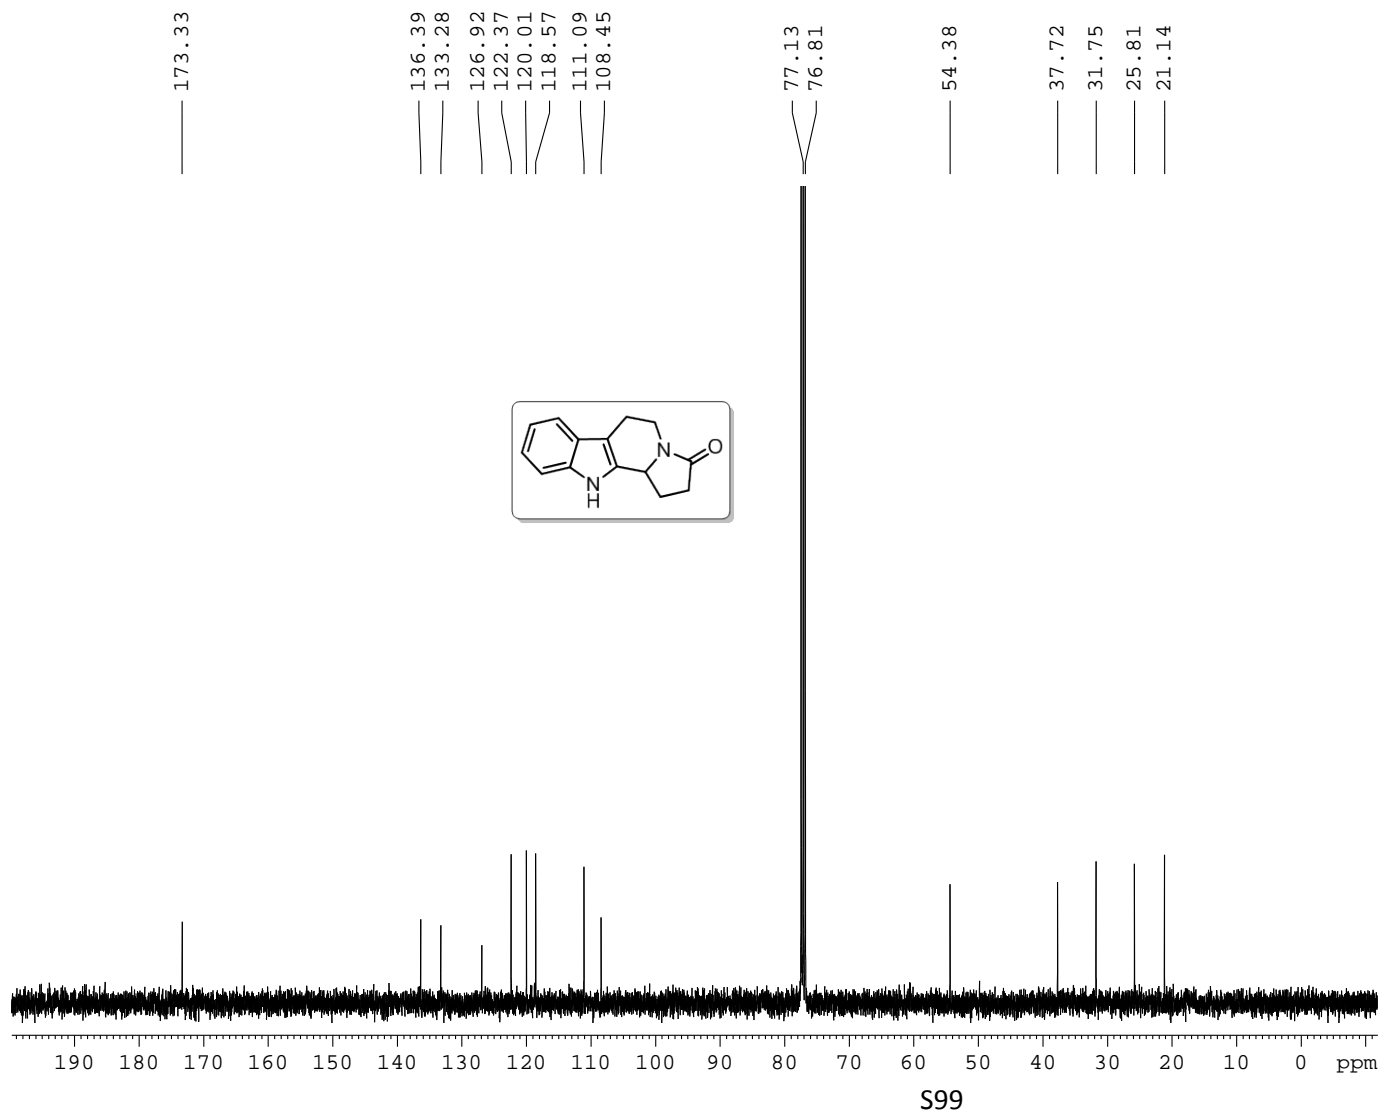

Current Data Parameters  
NAME SMR-1-109-1  
EXPNO 2  
PROCNO 1

F2 - Acquisition Parameters  
Date\_ 20100817  
Time 12.53  
INSTRUM spect  
PROBHD 5 mm BBO BB-1H  
PULPROG zgpg30  
TD 65536  
SOLVENT CDC13  
NS 256  
DS 4  
SWH 24038.461 Hz  
FIDRES 0.366798 Hz  
AQ 1.3631988 sec  
RG 50.8  
DW 20.800 usec  
DE 6.00 usec  
TE 296.7 K  
D1 2.00000000 sec  
d11 0.03000000 sec  
DELTA 1.899999998 sec  
TD0 1

=====  
CHANNEL f1  
NUC1 13C  
P1 9.50 usec  
PL1 -0.60 dB  
SFO1 100.6228298 MHz

=====  
CHANNEL f2  
CPDPRG2 waltz16  
NUC2 1H  
PCPD2 90.00 usec  
PL12 15.60 dB  
PL13 15.60 dB  
PL2 -0.90 dB  
SFO2 400.1316005 MHz

F2 - Processing parameters  
SI 32768  
SF 100.6127584 MHz  
WDW EM  
SSB 0  
LB 1.00 Hz  
GB 0  
PC 1.40

PROTON CDC13 {D:\CRR} crr 1

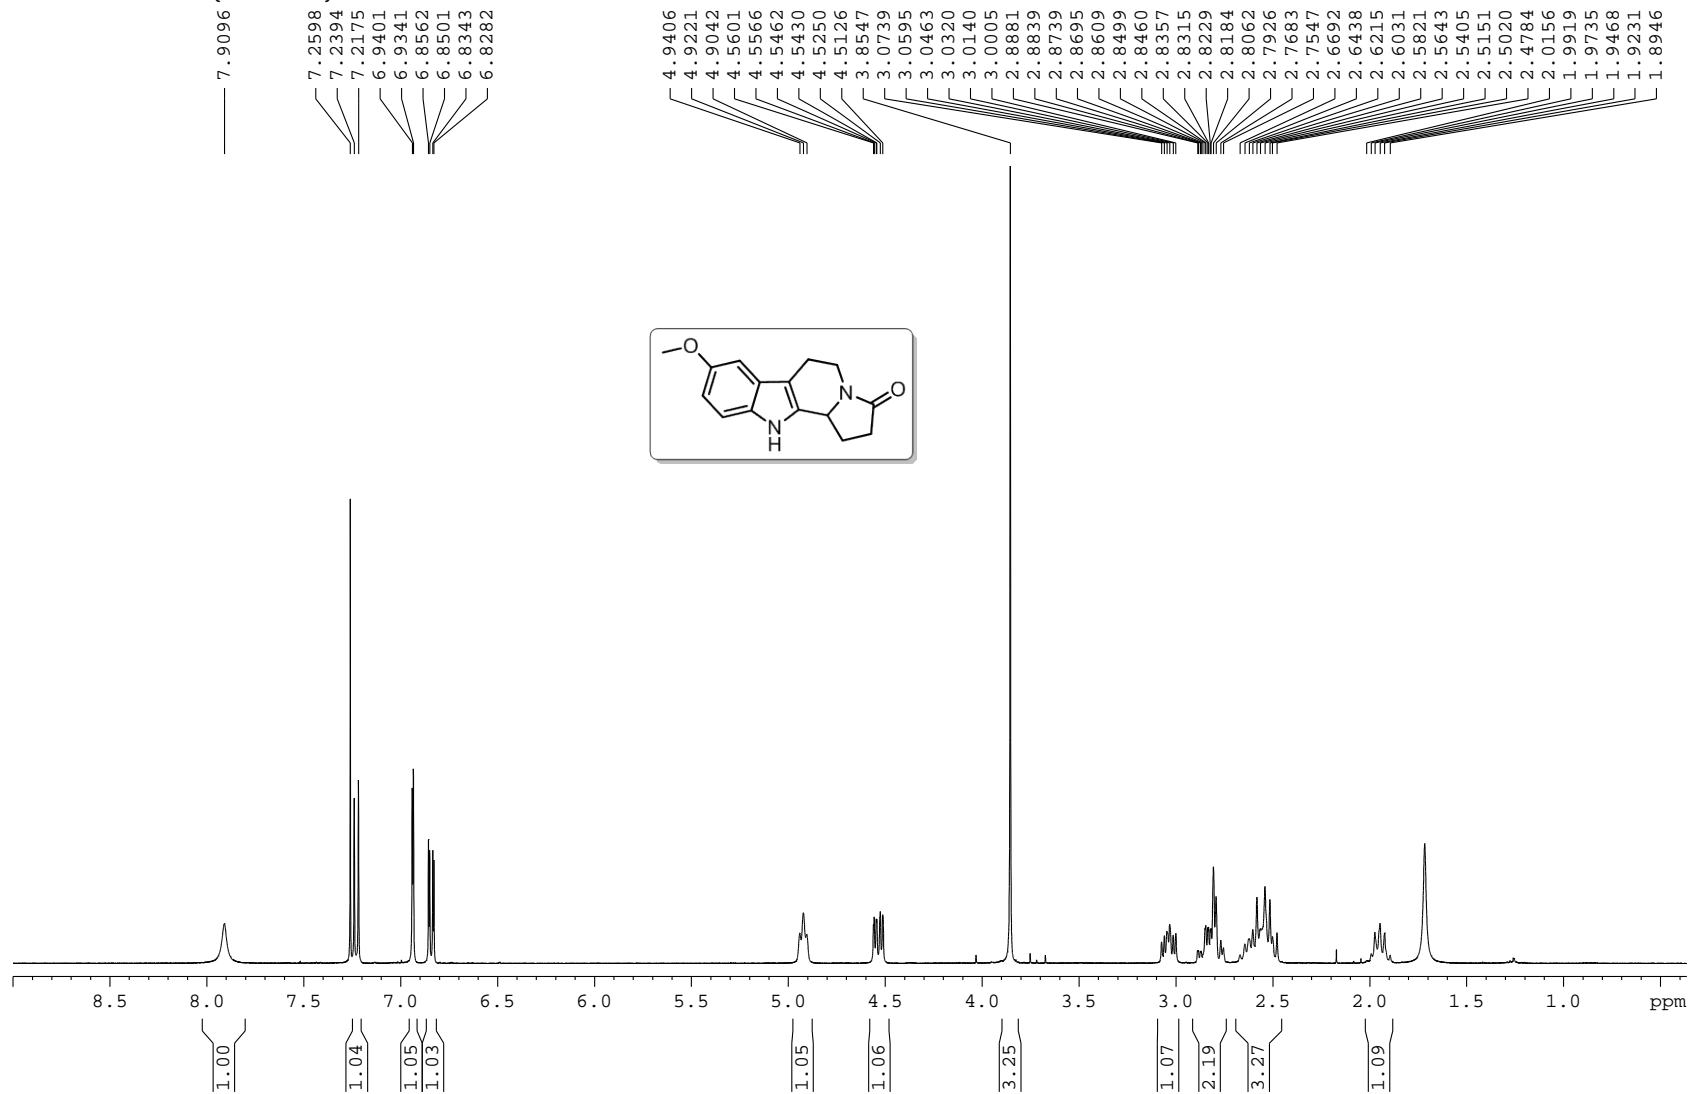

C13CPD DMSO {D:\CRR} KOPAL 1

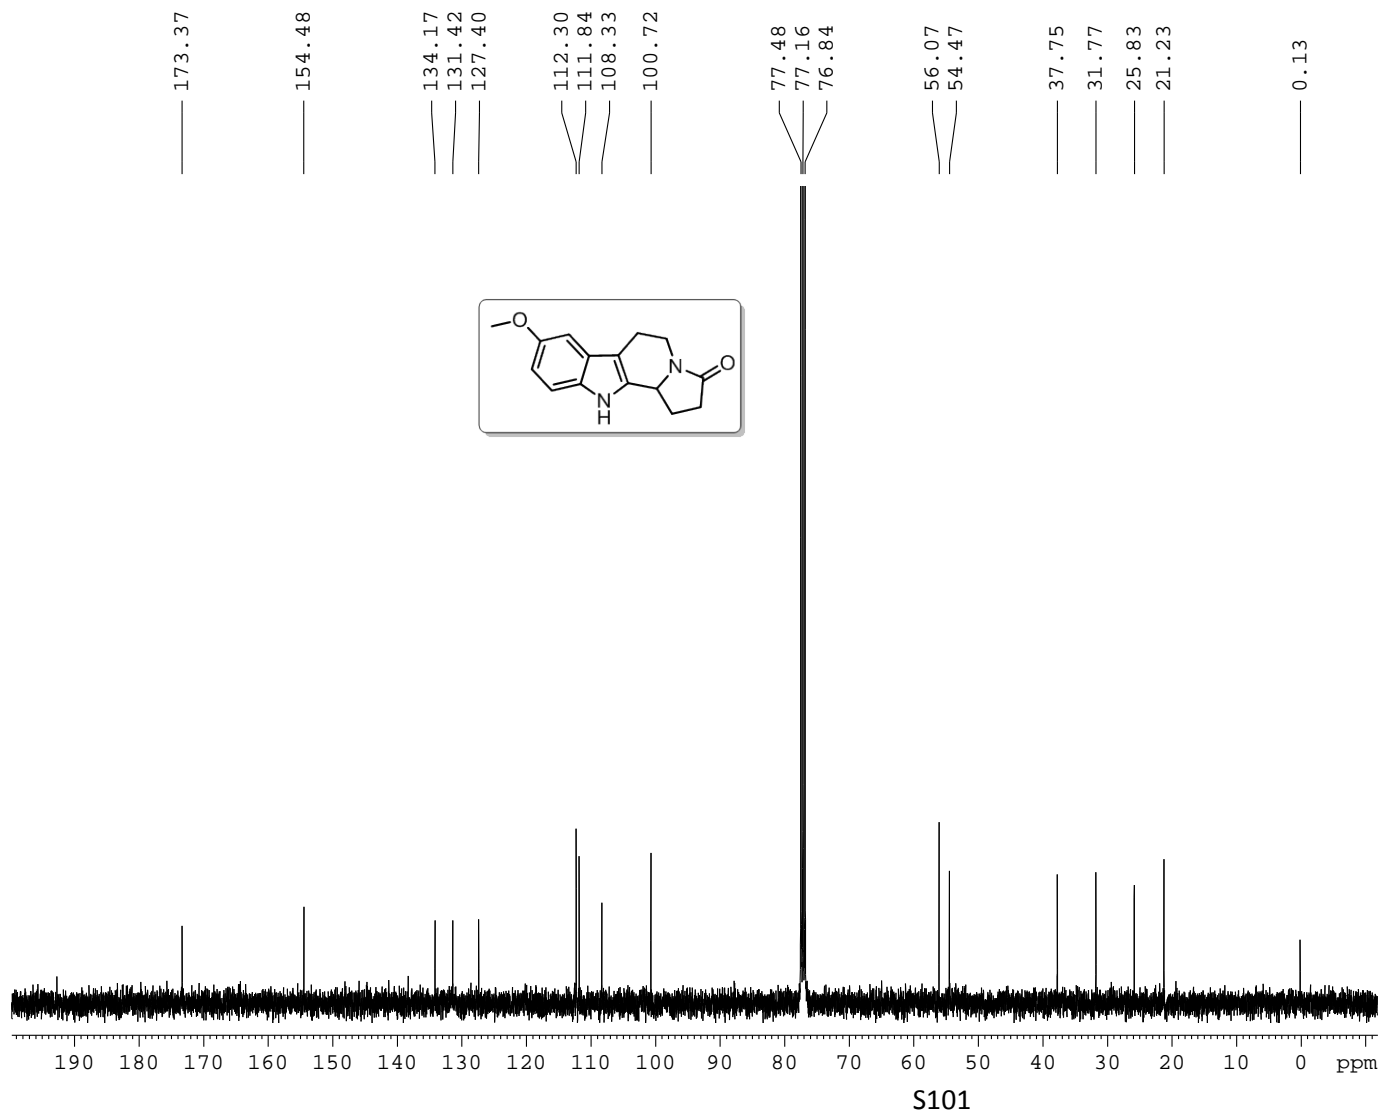

Current Data Parameters  
NAME SMR-I-236-2  
EXPNO 2  
PROCNO 1

F2 - Acquisition Parameters  
Date\_ 20110719  
Time 14.00  
INSTRUM spect  
PROBHD 5 mm BBO BB-1H  
PULPROG zgpg30  
TD 65536  
SOLVENT DMSO  
NS 341  
DS 4  
SWH 24038.461 Hz  
FIDRES 0.366798 Hz  
AQ 1.3631988 sec  
RG 1150  
DW 20.800 usec  
DE 6.00 usec  
TE 296.5 K  
D1 2.00000000 sec  
d11 0.03000000 sec  
DELTA 1.89999998 sec  
TD0 1

=====  
CHANNEL f1  
NUC1 13C  
P1 9.50 usec  
PL1 -0.60 dB  
SFO1 100.6228298 MHz

=====  
CHANNEL f2  
CPDPRG2 waltz16  
NUC2 1H  
PCPD2 90.00 usec  
PL12 15.60 dB  
PL13 15.60 dB  
PL2 -0.90 dB  
SFO2 400.1316005 MHz

F2 - Processing parameters  
SI 32768  
SF 100.6122763 MHz  
WDW EM  
SSB 0  
LB 1.00 Hz  
GB 0  
PC 1.40

PROTON CDC13 {D:\CRR} KOPAL 1

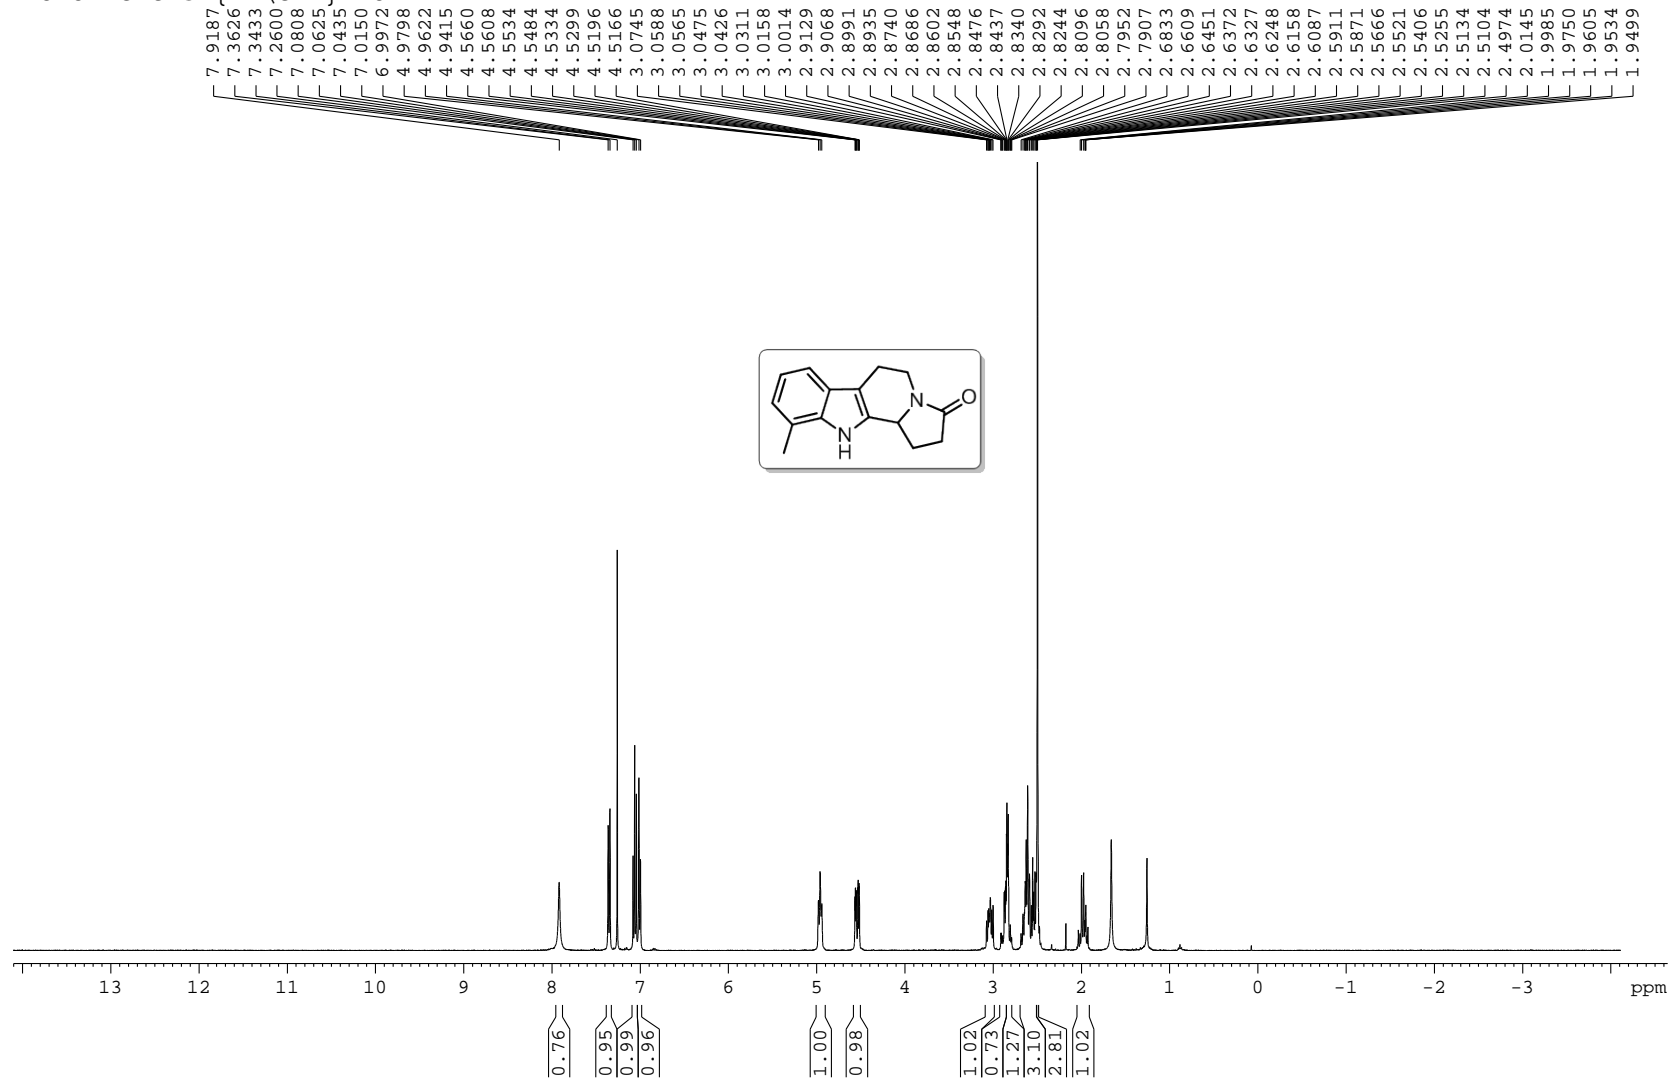

C13CPD CDC13 {D:\CRR} KOPAL 1

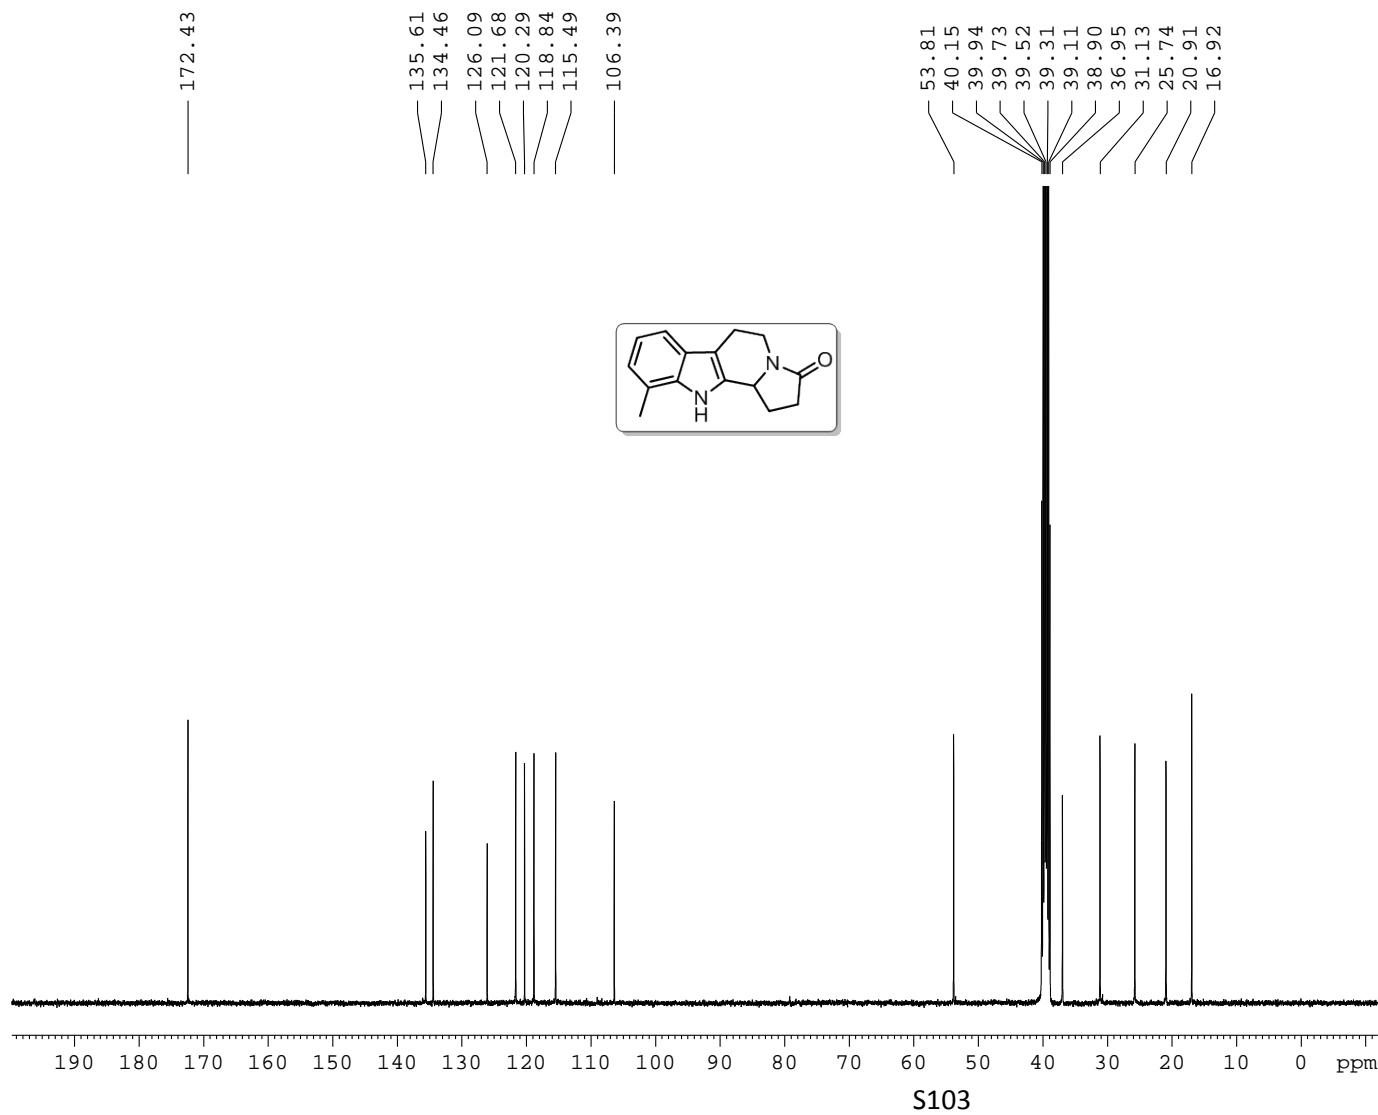

Current Data Parameters  
NAME CRR-SMR-CON-H  
EXPNO 1  
PROCNO 1

F2 - Acquisition Parameters  
Date\_ 20120229  
Time 9.48  
INSTRUM spect  
PROBHD 5 mm BBO BB-1H  
PULPROG zgpg30  
TD 65536  
SOLVENT CDC13  
NS 18000  
DS 4  
SWH 24038.461 Hz  
FIDRES 0.366798 Hz  
AQ 1.3631988 sec  
RG 50.8  
DW 20.800 usec  
DE 6.00 usec  
TE 291.9 K  
D1 2.00000000 sec  
d11 0.03000000 sec  
DELTA 1.89999998 sec  
TD0 1

==== CHANNEL f1 =====  
NUC1 13C  
P1 9.50 usec  
PL1 -0.60 dB  
SFO1 100.6228298 MHz

==== CHANNEL f2 =====  
CPDPRG2 waltz16  
NUC2 1H  
PCPD2 90.00 usec  
PL12 15.60 dB  
PL13 15.60 dB  
PL2 -0.90 dB  
SFO2 400.1316005 MHz

F2 - Processing parameters  
SI 32768  
SF 100.6132881 MHz  
WDW EM  
SSB 0  
LB 1.00 Hz  
GB 0  
PC 1.40

PROTON CDC13 {D:\CRR} KOPAL 1

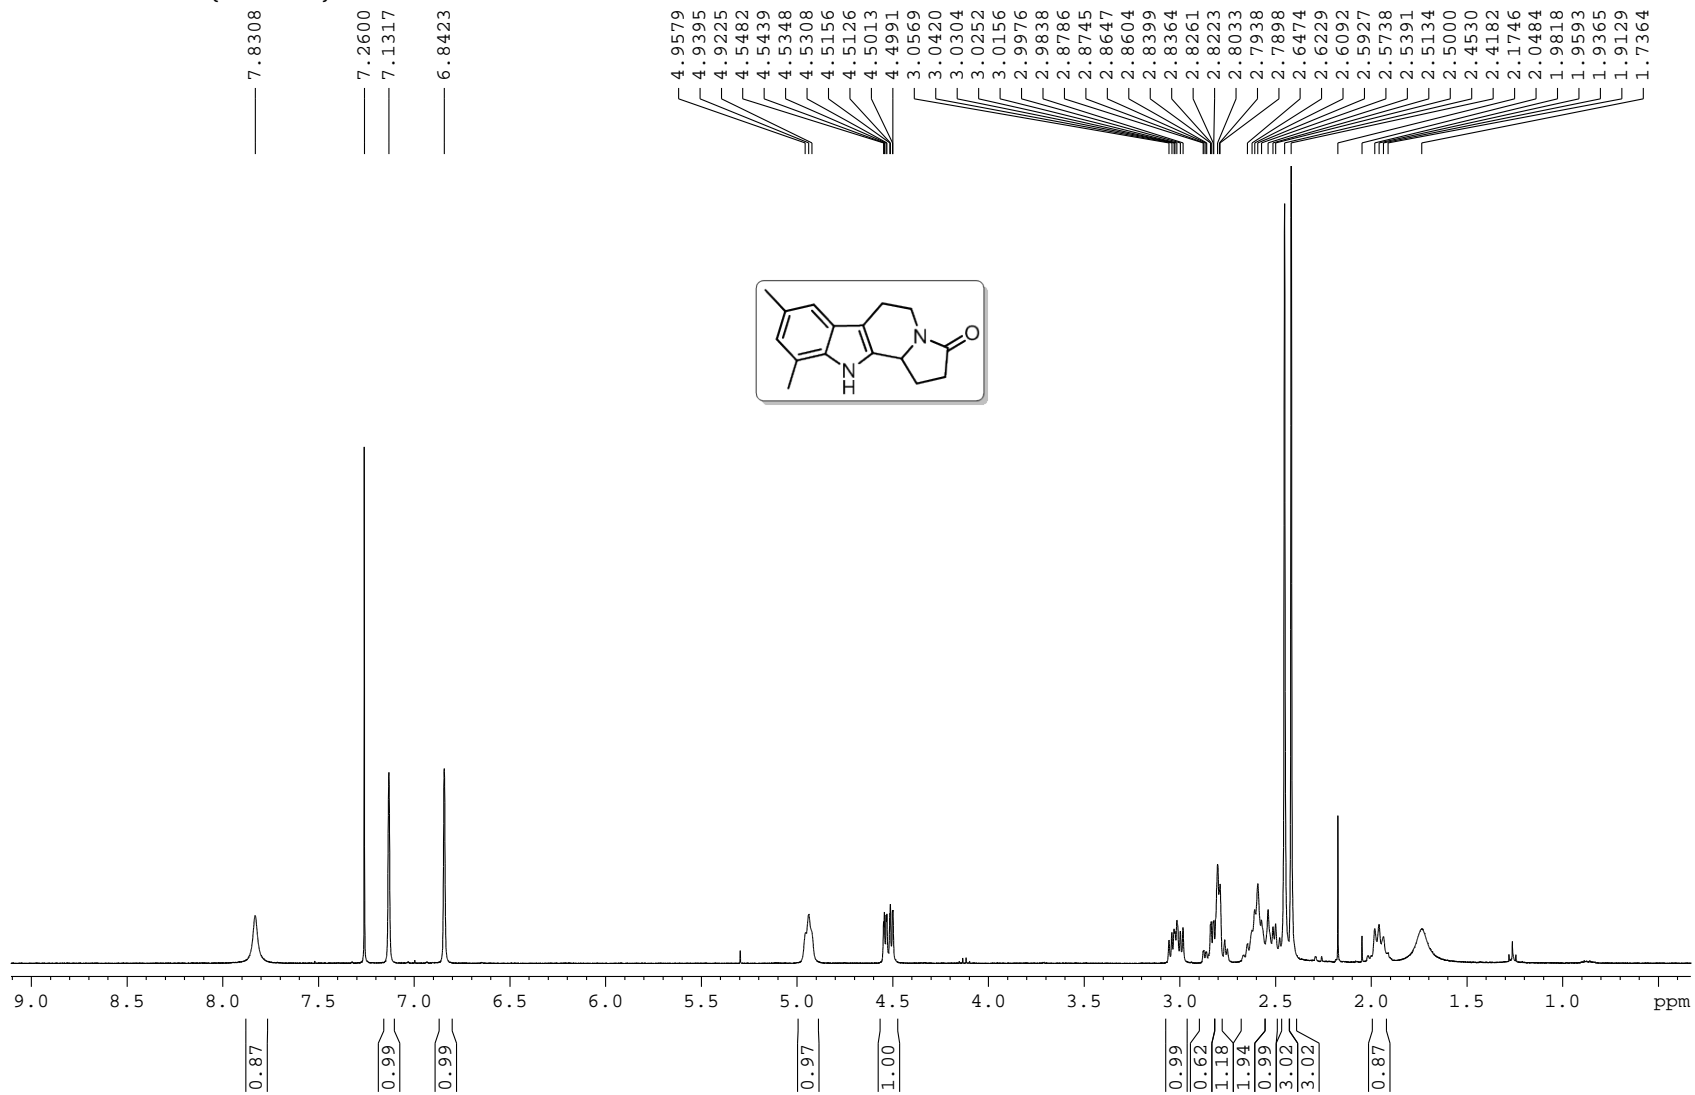

S104



C13CPD CDC13 {D:\CRR} KOPAL 1

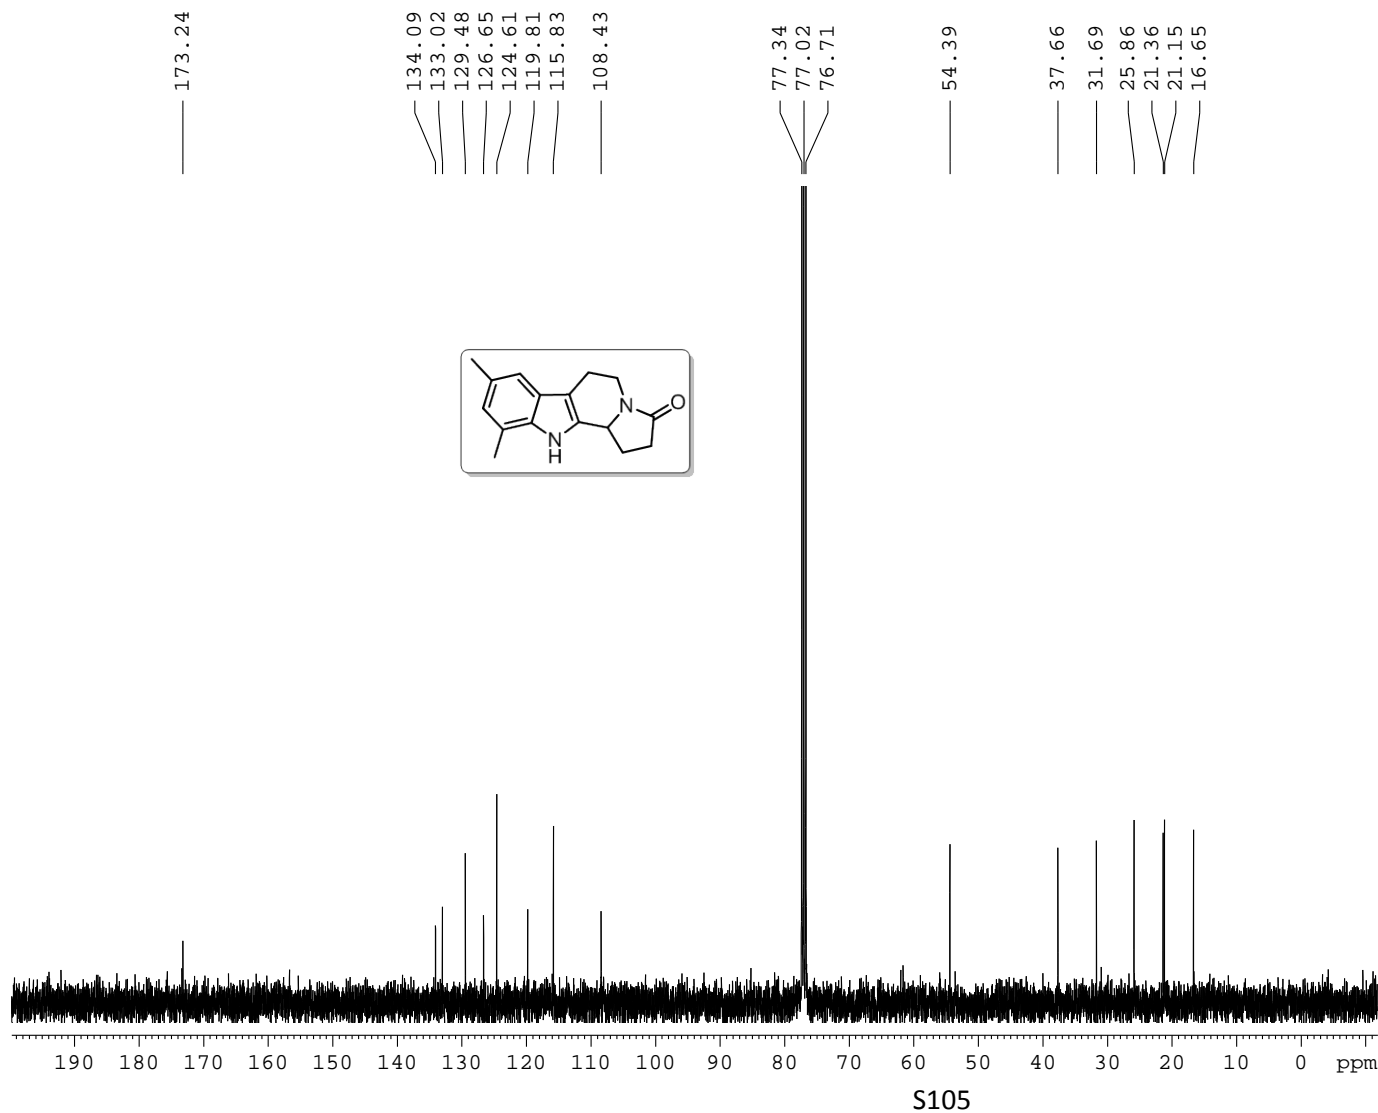

Current Data Parameters  
NAME SMR-239-2A  
EXPNO 2  
PROCNO 1

F2 - Acquisition Parameters  
Date\_ 20110722  
Time 12.14  
INSTRUM spect  
PROBHD 5 mm BBO BB-1H  
PULPROG zgpg30  
TD 65536  
SOLVENT CDC13  
NS 194  
DS 4  
SWH 24038.461 Hz  
FIDRES 0.366798 Hz  
AQ 1.3631988 sec  
RG 50.8  
DW 20.800 usec  
DE 6.00 usec  
TE 296.5 K  
D1 2.00000000 sec  
d11 0.03000000 sec  
DELTA 1.899999998 sec  
TD0 1

=====  
CHANNEL f1  
NUC1 13C  
P1 9.50 usec  
PL1 -0.60 dB  
SFO1 100.6228298 MHz

=====  
CHANNEL f2  
CPDPRG2 waltz16  
NUC2 1H  
PCPD2 90.00 usec  
PL12 15.60 dB  
PL13 15.60 dB  
PL2 -0.90 dB  
SFO2 400.1316005 MHz

F2 - Processing parameters  
SI 32768  
SF 100.6127690 MHz  
WDW EM  
SSB 0  
LB 1.00 Hz  
GB 0  
PC 1.40

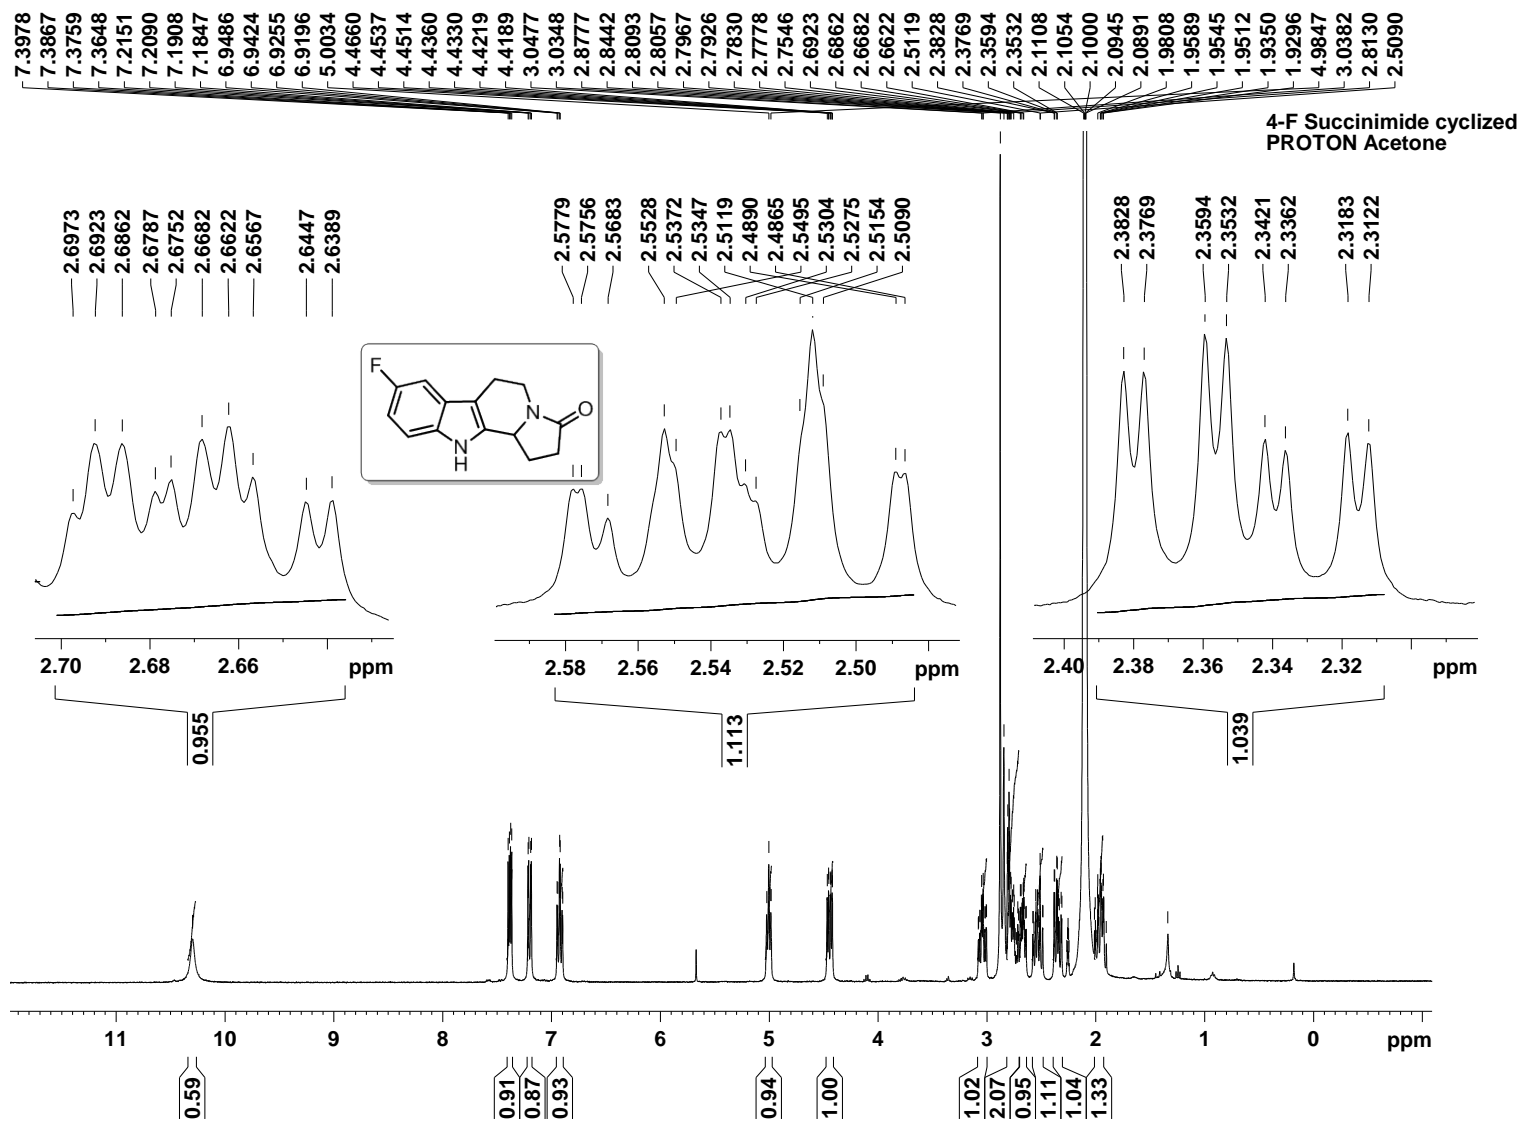

4-F Succinimide cyclized  
PROTON Acetone

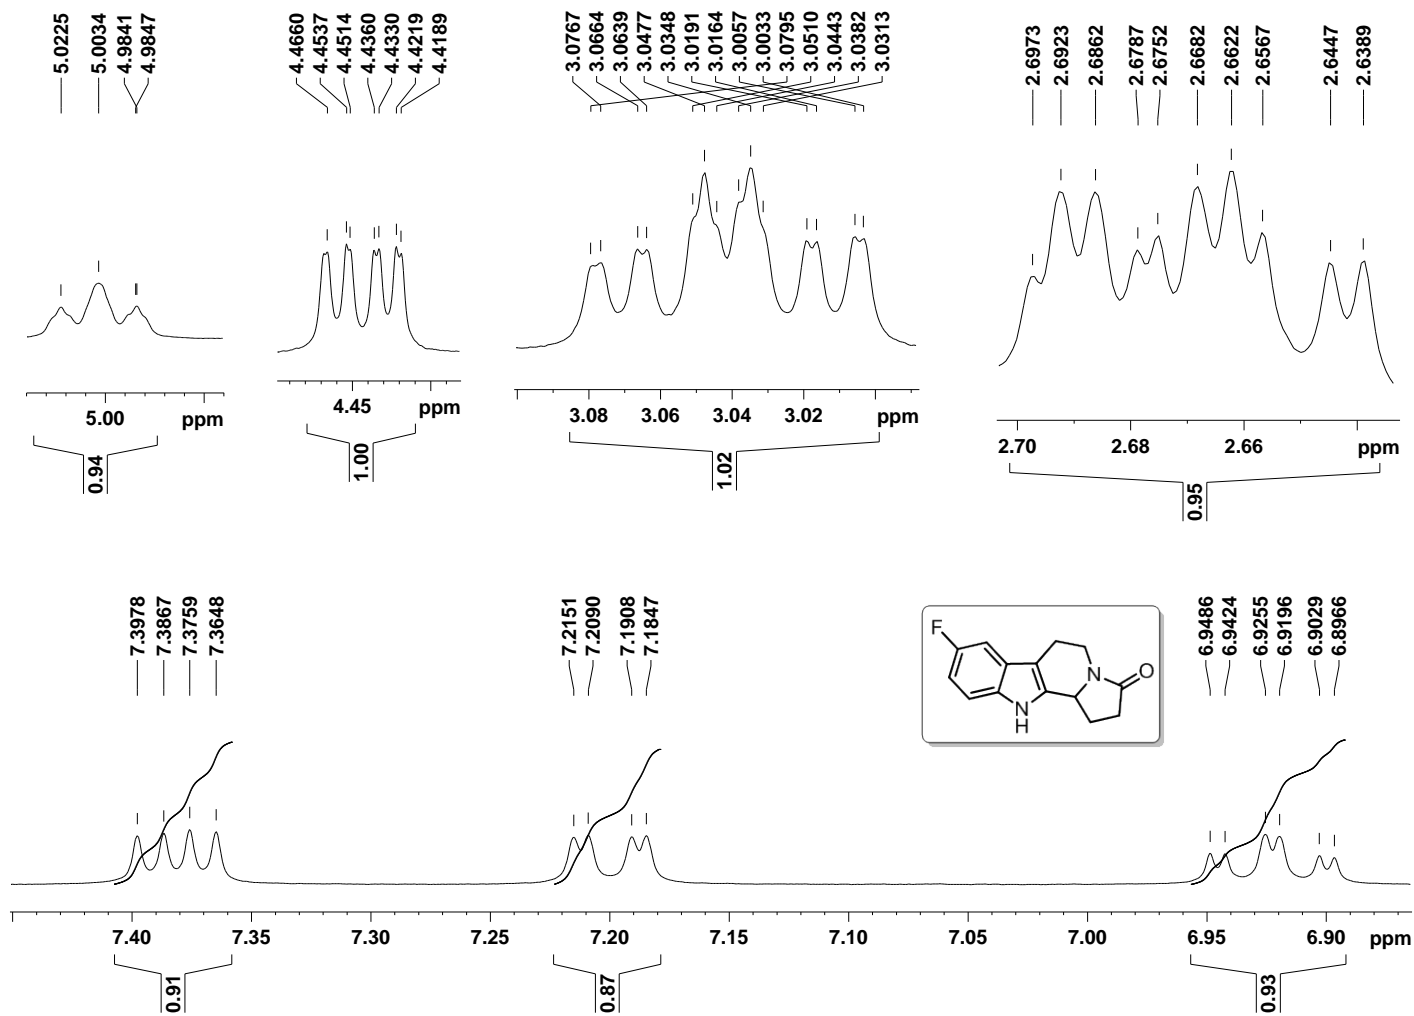

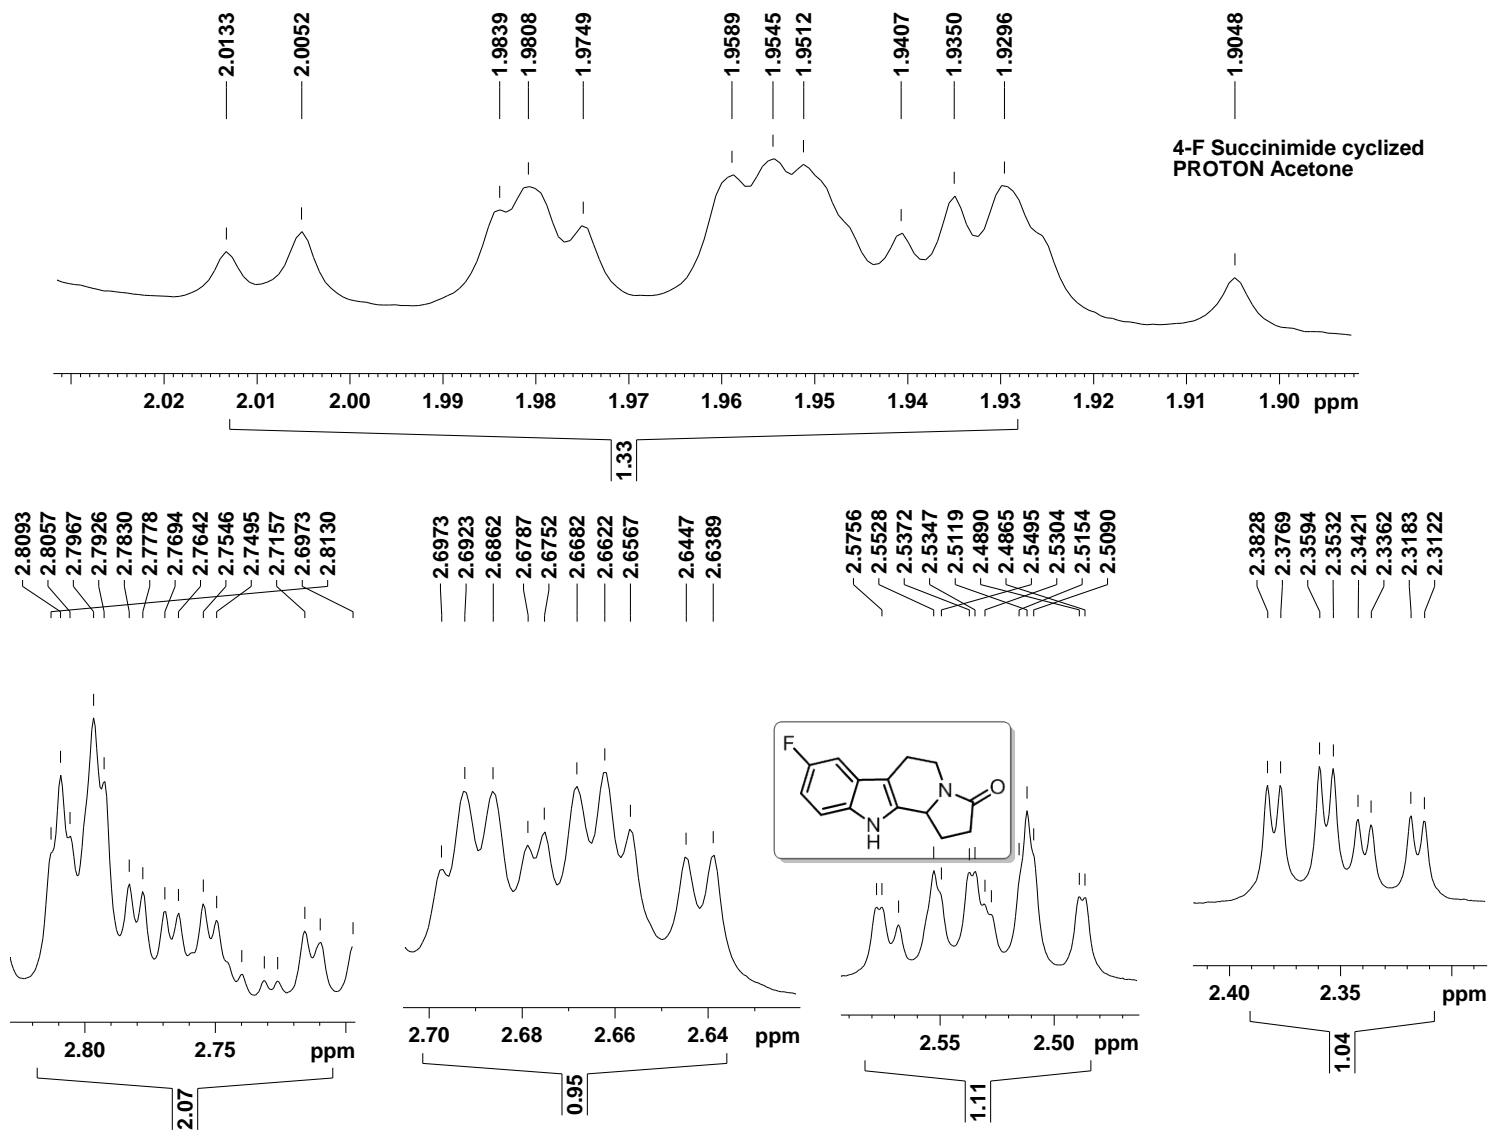

C13CPD DMSO {D:\CRR} KOPAL 1

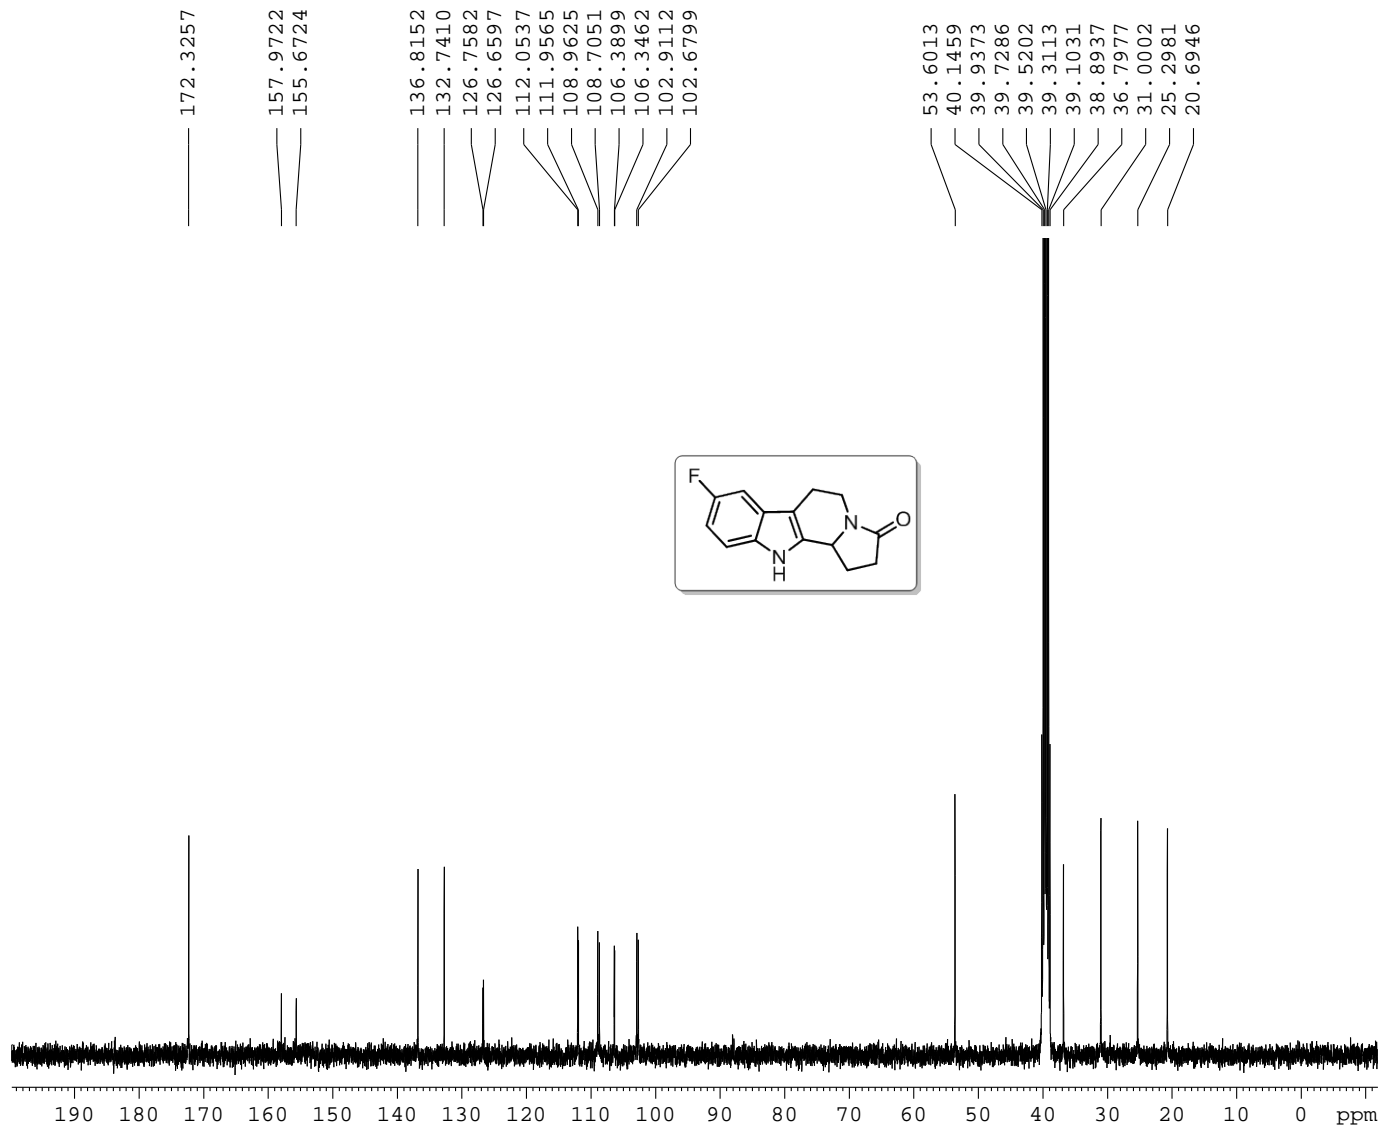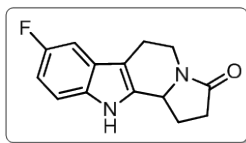

Current Data Parameters  
NAME SMR-I-188  
EXPNO 2  
PROCNO 1

F2 - Acquisition Parameters  
Date\_ 20110321  
Time 11.02  
INSTRUM spect  
PROBHD 5 mm BBO BB-1H  
PULPROG zgpg30  
TD 65536  
SOLVENT DMSO  
NS 512  
DS 4  
SWH 24038.461 Hz  
FIDRES 0.366798 Hz  
AQ 1.3631988 sec  
RG 1290  
DW 20.800 usec  
DE 6.00 usec  
TE 295.5 K  
D1 2.00000000 sec  
d11 0.03000000 sec  
DELTA 1.899999998 sec  
TD0 1

==== CHANNEL f1 =====  
NUC1 13C  
P1 9.50 usec  
PL1 -0.60 dB  
SFO1 100.6228298 MHz

==== CHANNEL f2 =====  
CPDPRG2 waltz16  
NUC2 1H  
PCPD2 90.00 usec  
PL12 15.60 dB  
PL13 15.60 dB  
PL2 -0.90 dB  
SFO2 400.1316005 MHz

F2 - Processing parameters  
SI 32768  
SF 100.6128120 MHz  
WDW EM  
SSB 0  
LB 1.00 Hz  
GB 0  
PC 1.40

S109

PROTON CDC13 {D:\CRR} KOPAL 1

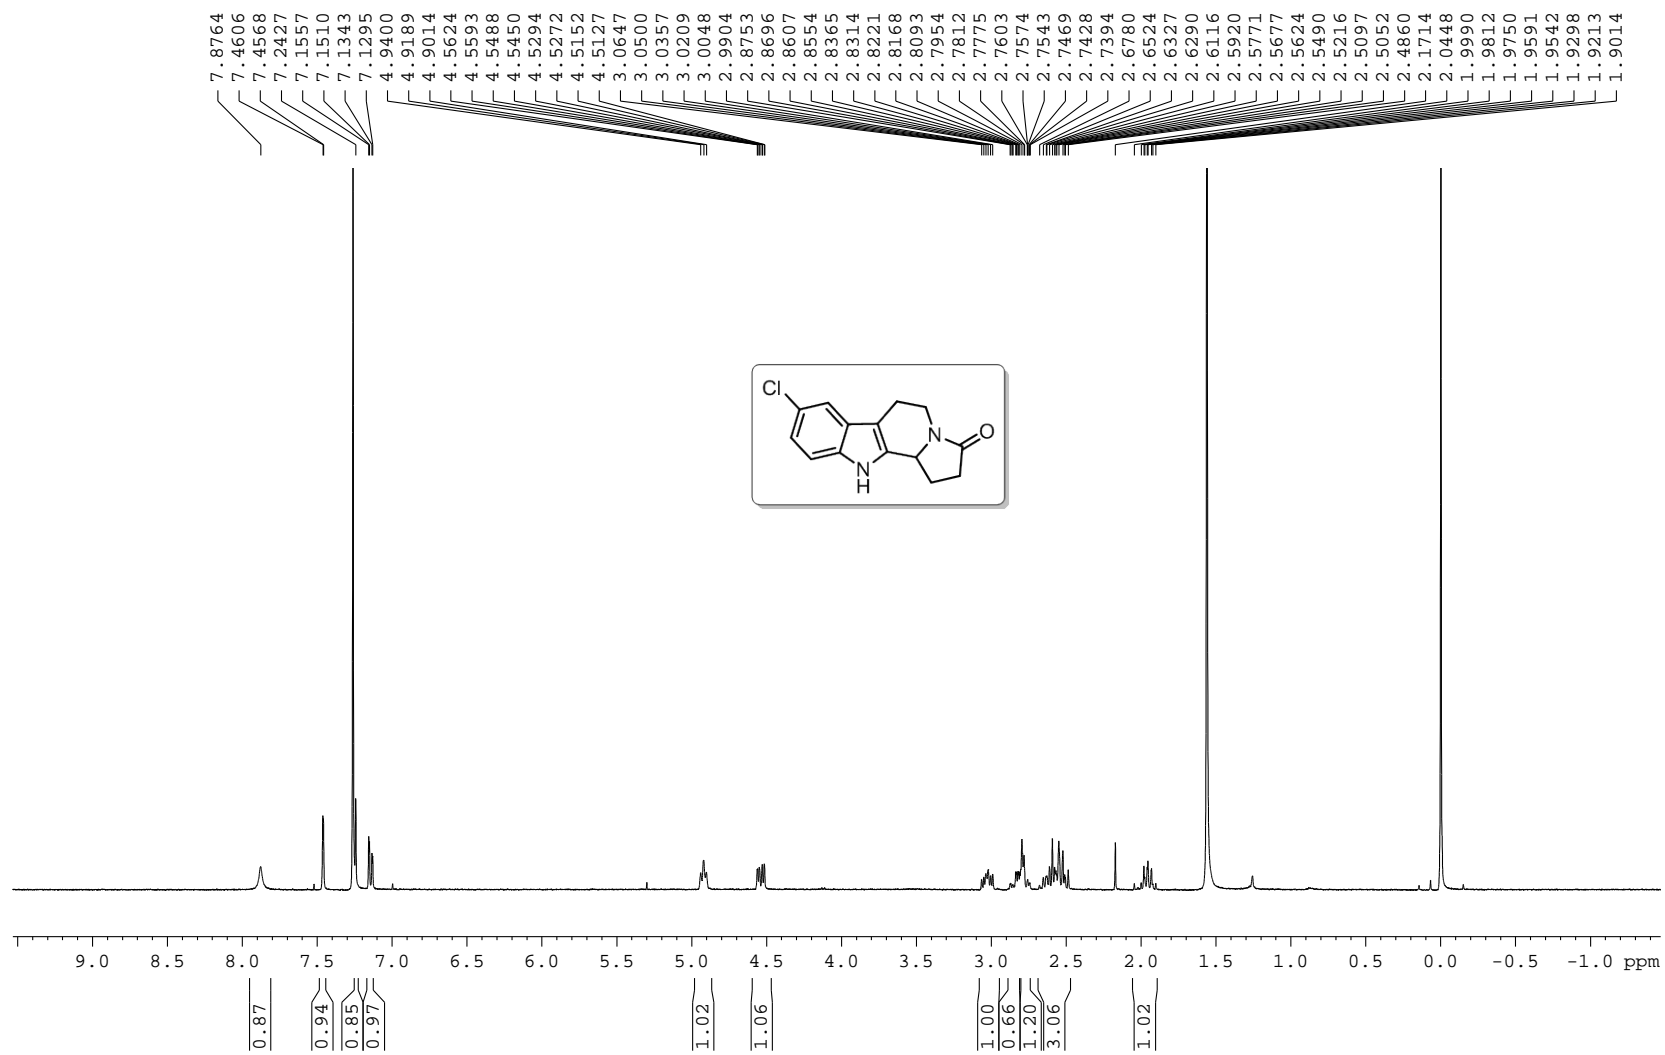

C13CPD CDC13 {D:\CRR} KOPAL 1

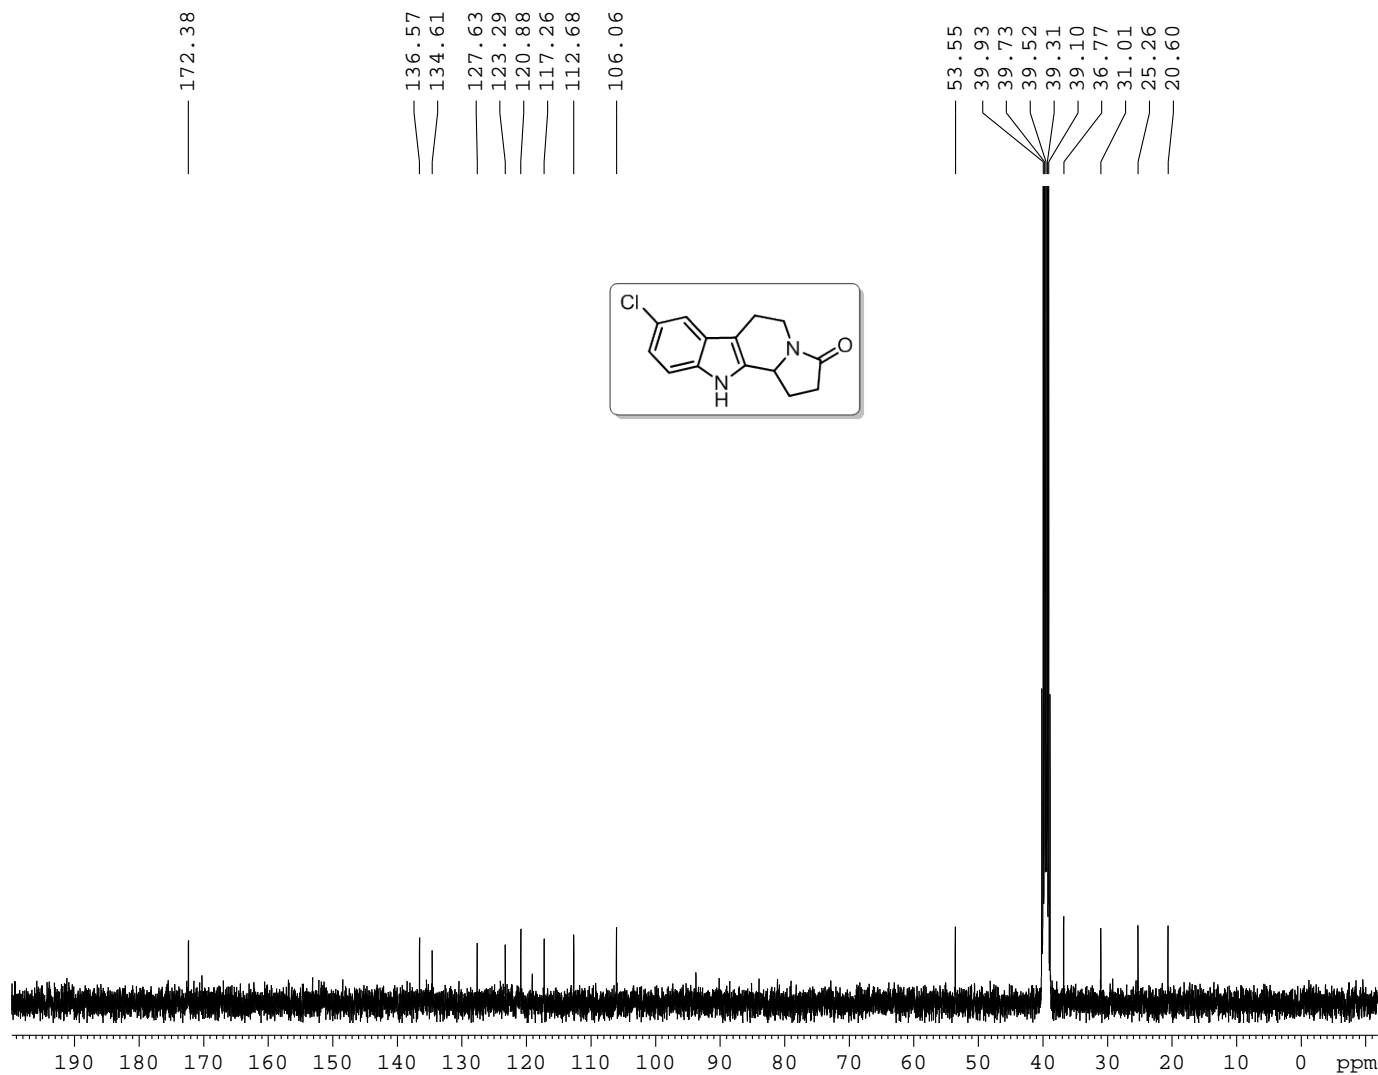

Current Data Parameters  
NAME SMR-I-196-2A  
EXPNO 1  
PROCNO 1

F2 - Acquisition Parameters  
Date\_ 20110330  
Time 14.53  
INSTRUM spect  
PROBHD 5 mm BBO BB-1H  
PULPROG zgpg30  
TD 65536  
SOLVENT CDC13  
NS 256  
DS 4  
SWH 24038.461 Hz  
FIDRES 0.366798 Hz  
AQ 1.3631988 sec  
RG 50.8  
DW 20.800 usec  
DE 6.00 usec  
TE 295.5 K  
D1 2.00000000 sec  
d11 0.03000000 sec  
DELTA 1.89999998 sec  
TD0 1

=====  
CHANNEL f1  
NUC1 13C  
P1 9.50 usec  
PL1 -0.60 dB  
SFO1 100.6228298 MHz

=====  
CHANNEL f2  
CPDPRG2 waltz16  
NUC2 1H  
PCPD2 90.00 usec  
PL12 15.60 dB  
PL13 15.60 dB  
PL2 -0.90 dB  
SFO2 400.1316005 MHz

F2 - Processing parameters  
SI 32768  
SF 100.6132885 MHz  
WDW EM  
SSB 0  
LB 1.00 Hz  
GB 0  
PC 1.40

S111

PROTON CDCl3 {D:\CRR} KOPAL 1

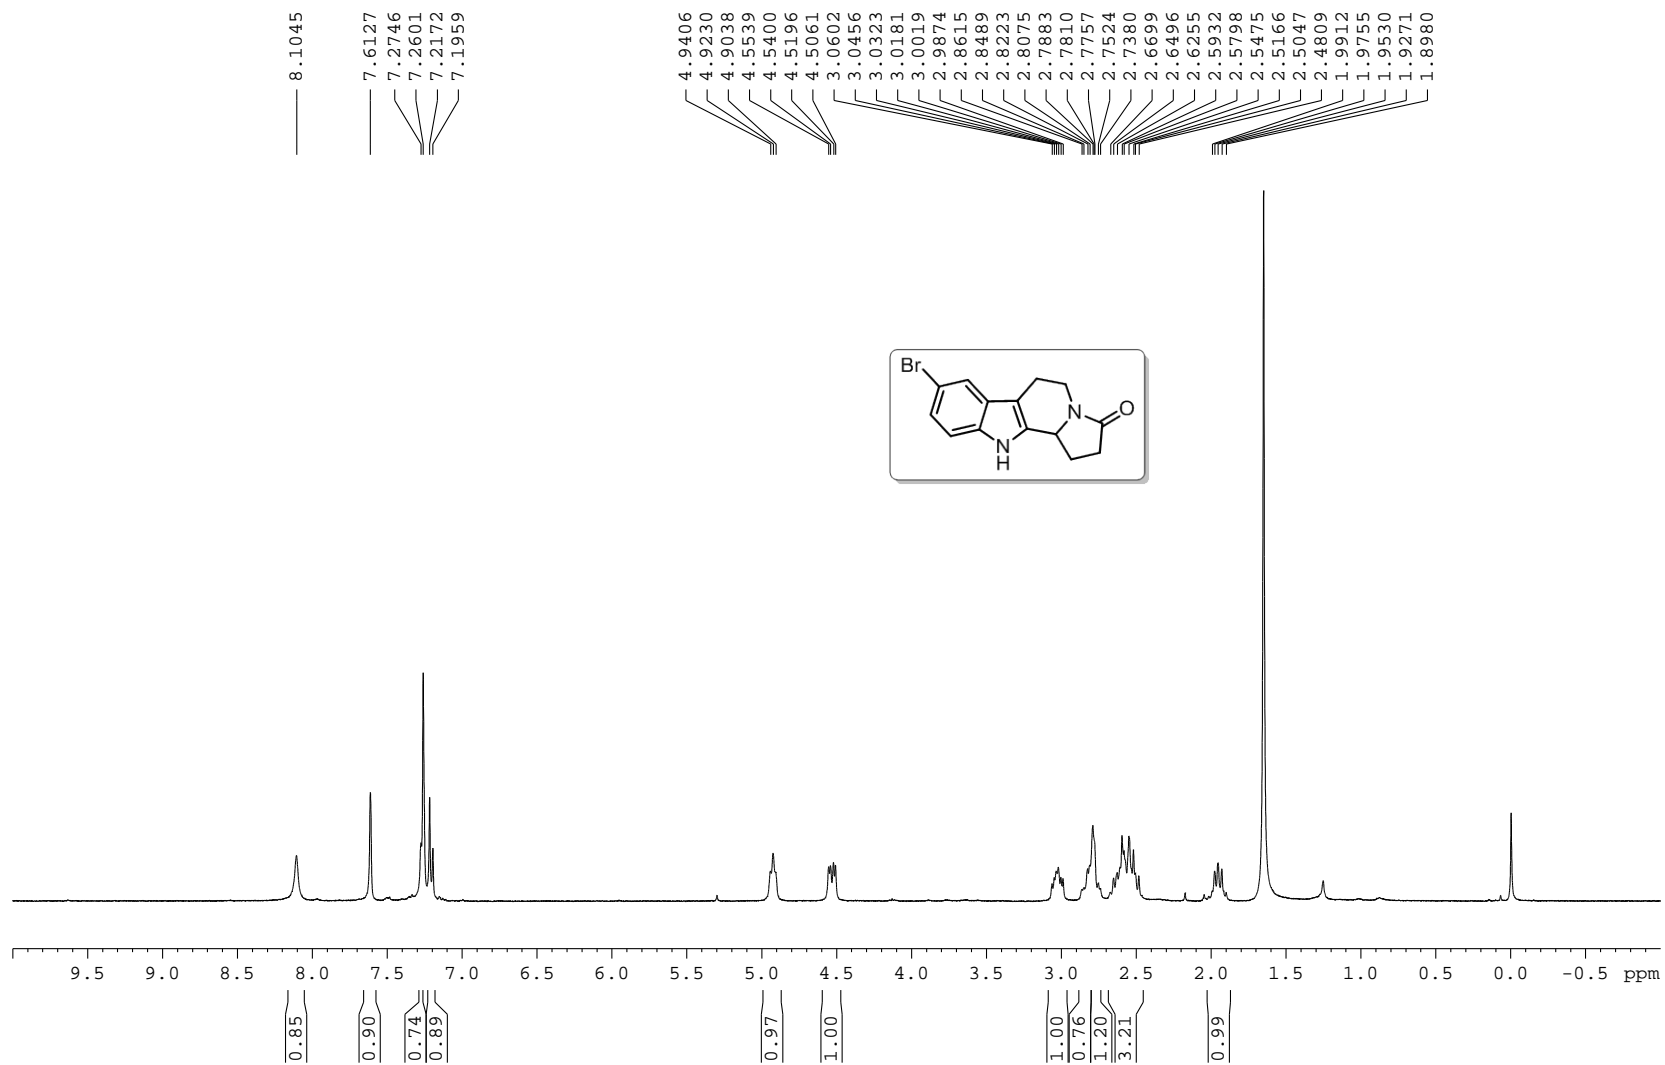



C13CPD CDC13 {D:\CRR} KOPAL 1

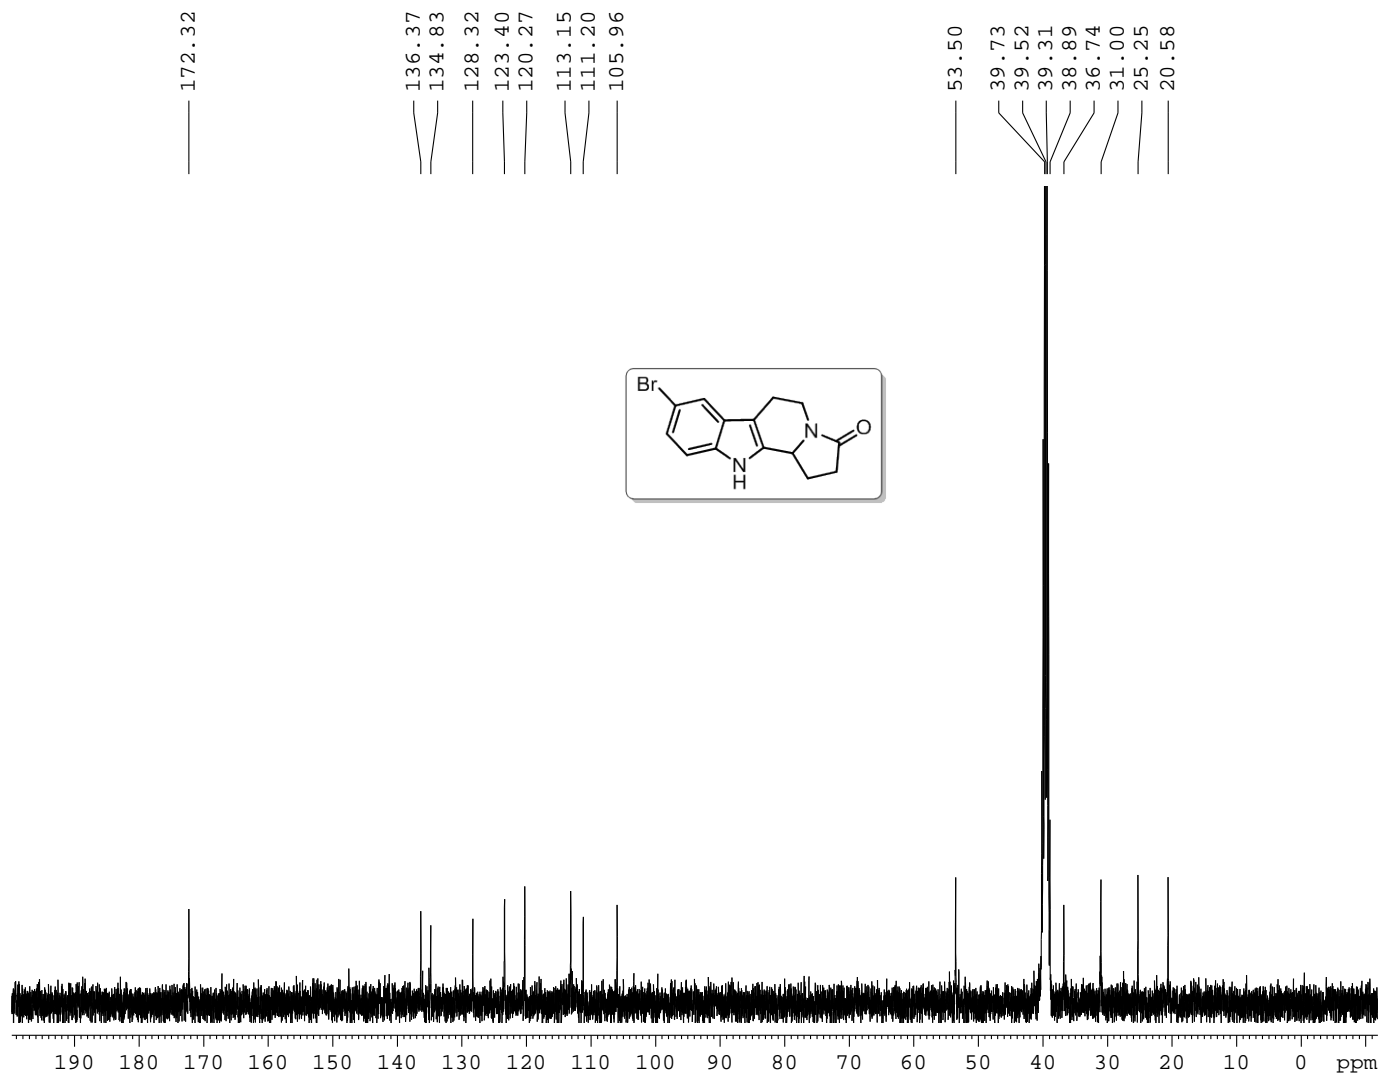

S113

Current Data Parameters  
NAME SMR-I-189-2  
EXPNO 4  
PROCNO 1

F2 - Acquisition Parameters  
Date\_ 20110321  
Time 17.11  
INSTRUM spect  
PROBHD 5 mm BBO BB-1H  
PULPROG zgpg30  
TD 65536  
SOLVENT CDC13  
NS 123  
DS 4  
SWH 24038.461 Hz  
FIDRES 0.366798 Hz  
AQ 1.3631988 sec  
RG 912  
DW 20.800 usec  
DE 6.00 usec  
TE 294.6 K  
D1 2.00000000 sec  
d11 0.03000000 sec  
DELTA 1.89999998 sec  
TD0 1

==== CHANNEL f1 =====  
NUC1 13C  
P1 9.50 usec  
PL1 -0.60 dB  
SFO1 100.6228298 MHz

==== CHANNEL f2 =====  
CPDPRG2 waltz16  
NUC2 1H  
PCPD2 90.00 usec  
PL12 15.60 dB  
PL13 15.60 dB  
PL2 -0.90 dB  
SFO2 400.1316005 MHz

F2 - Processing parameters  
SI 32768  
SF 100.6132883 MHz  
WDW EM  
SSB 0  
LB 1.00 Hz  
GB 0  
PC 1.40

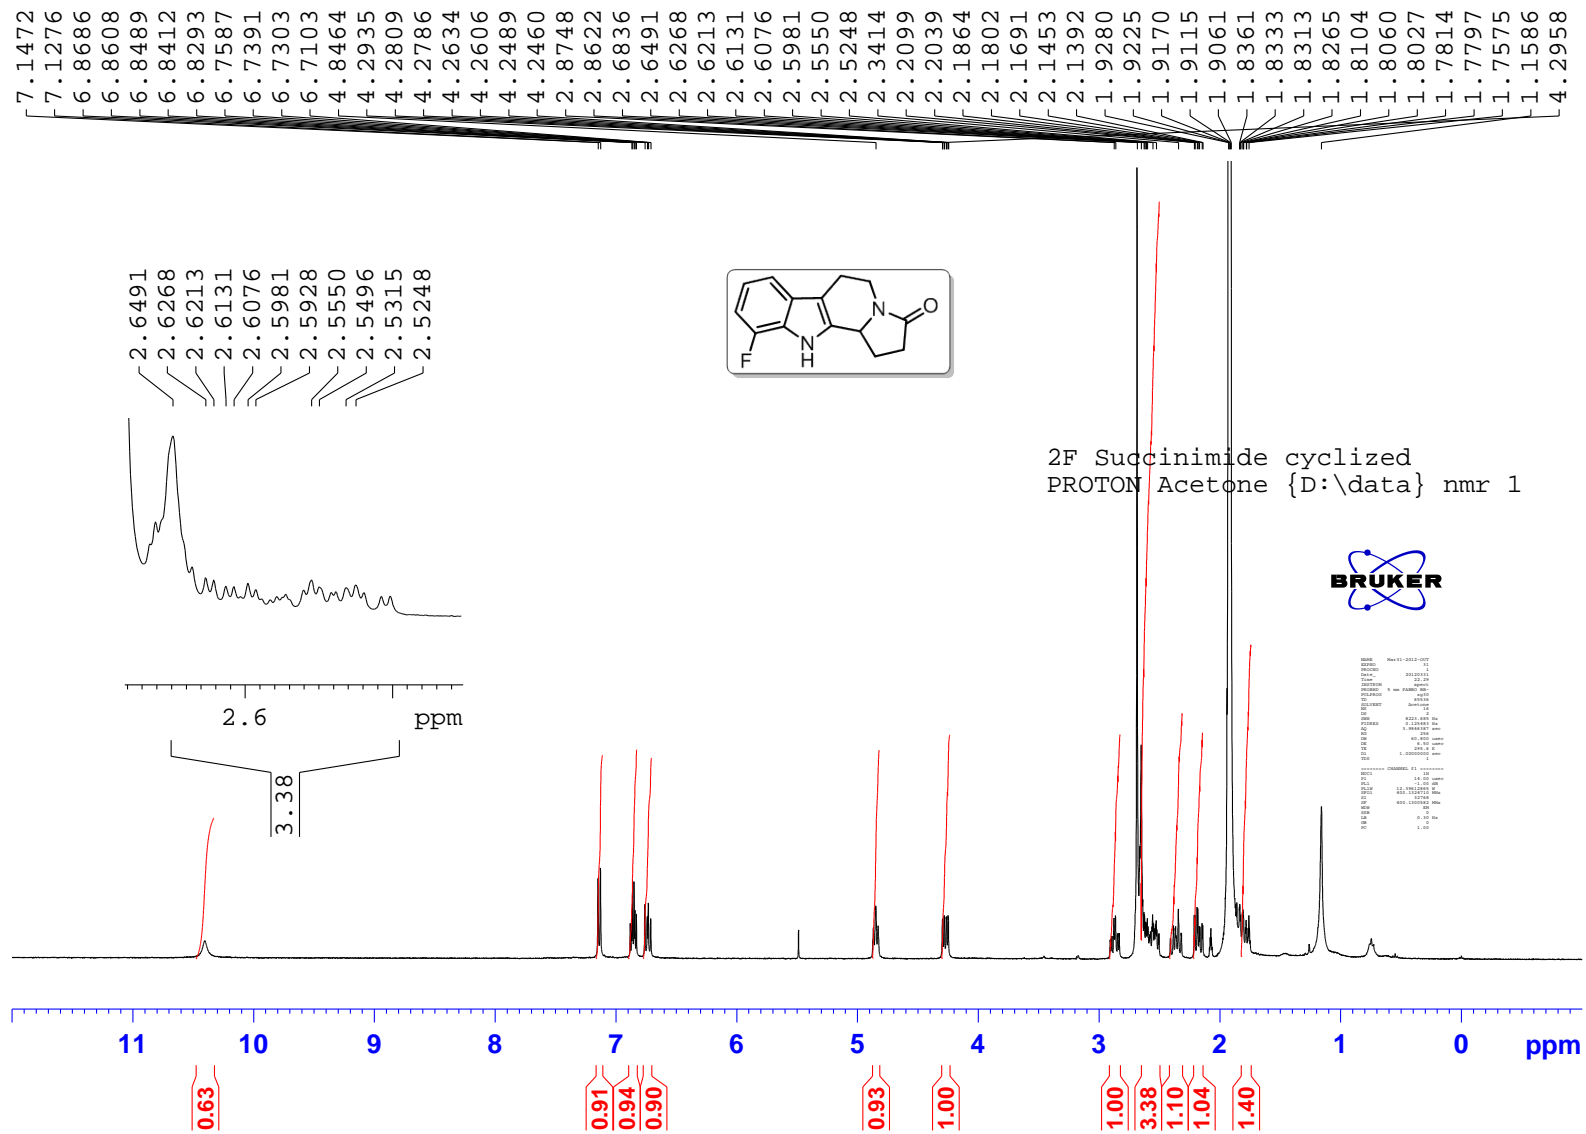

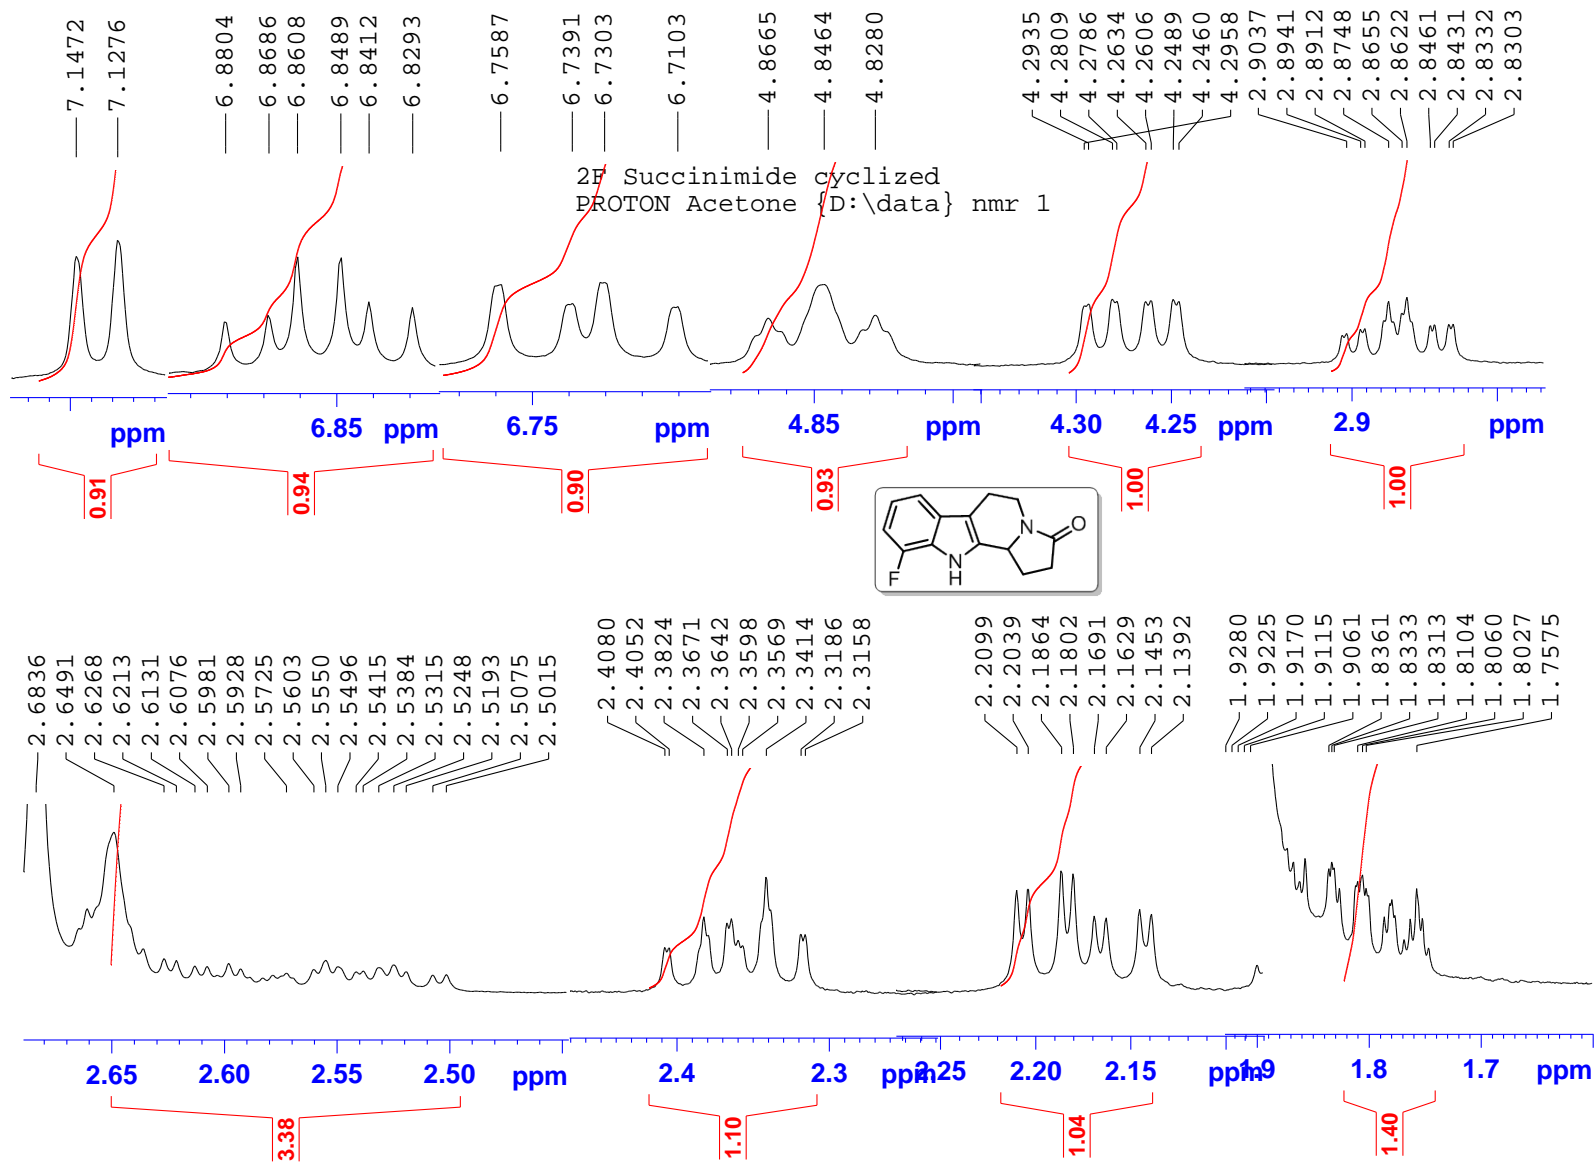

C13CPD DMSO {D:\CRR} KOPAL 1

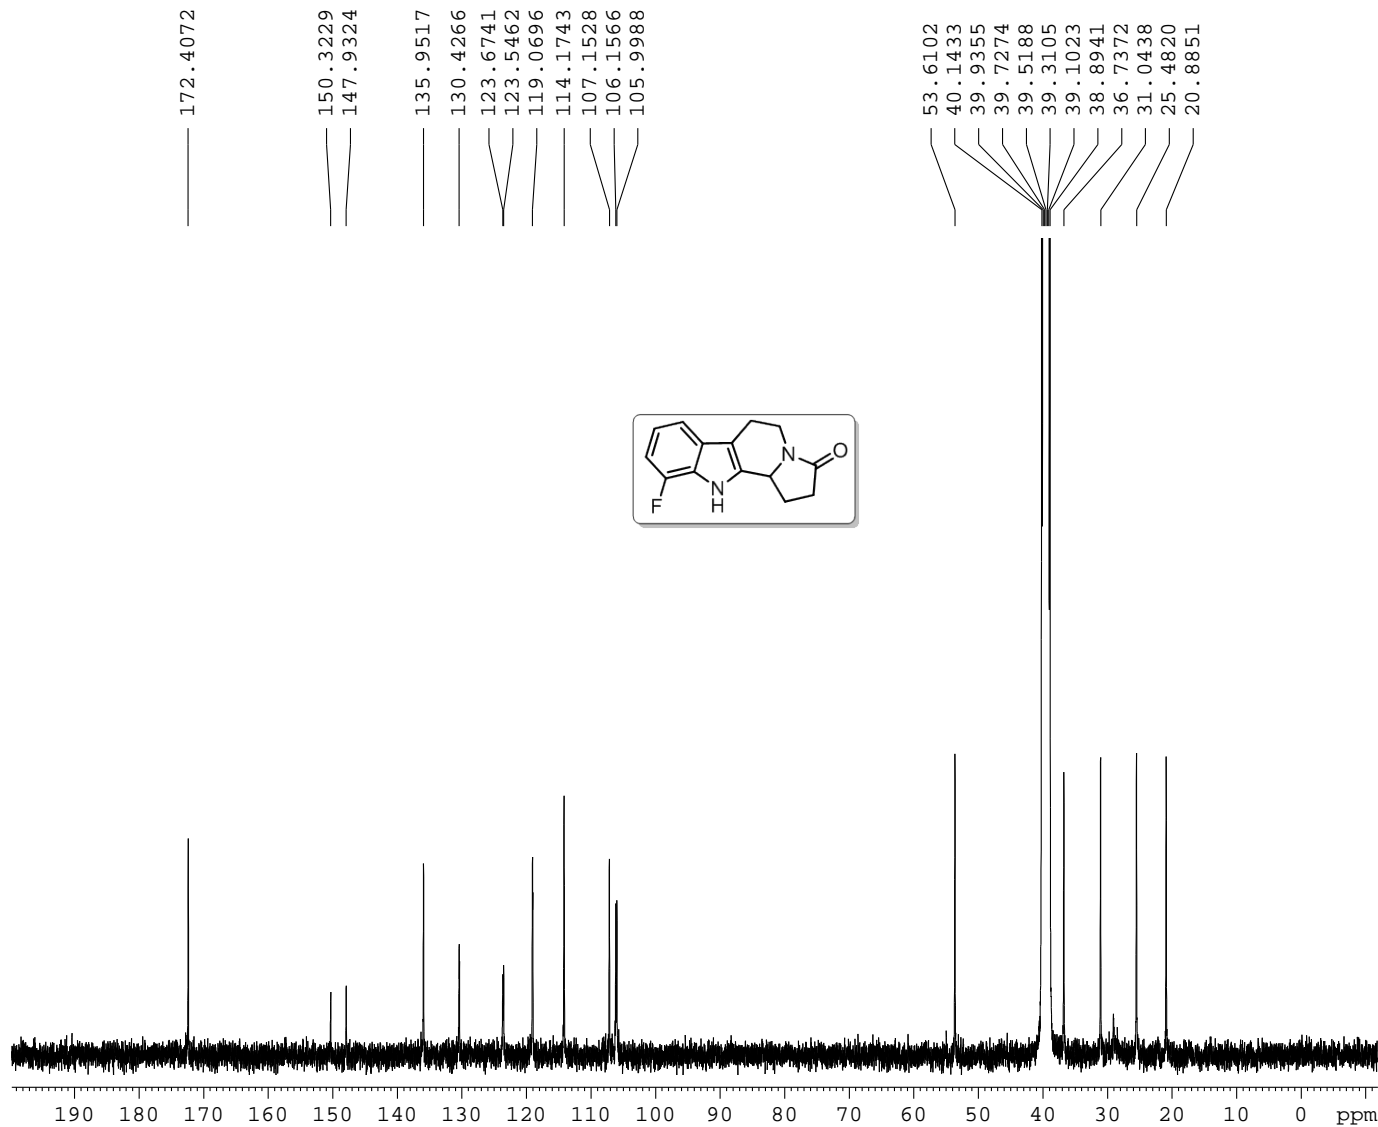

172.4072  
150.3229  
147.9324  
135.9517  
130.4266  
123.6741  
123.5462  
119.0696  
114.1743  
107.1528  
106.1566  
105.9988  
53.6102  
40.1433  
39.9355  
39.7274  
39.5188  
39.3105  
39.1023  
38.8941  
36.7372  
31.0438  
25.4820  
20.8851

Current Data Parameters  
NAME CRR-SMR-2FS  
EXPNO 1  
PROCNO 1

F2 - Acquisition Parameters  
Date\_ 20120124  
Time 10.13  
INSTRUM spect  
PROBHD 5 mm BBO BB-1H  
PULPROG zgpg30  
TD 65536  
SOLVENT DMSO  
NS 17942  
DS 4  
SWH 24038.461 Hz  
FIDRES 0.366798 Hz  
AQ 1.3631988 sec  
RG 50.8  
DW 20.800 usec  
DE 6.00 usec  
TE 291.9 K  
D1 2.00000000 sec  
d11 0.03000000 sec  
DELTA 1.89999998 sec  
TD0 1

==== CHANNEL f1 =====  
NUC1 13C  
P1 9.50 usec  
PL1 -0.60 dB  
SFO1 100.6228298 MHz

==== CHANNEL f2 =====  
CPDPRG2 waltz16  
NUC2 1H  
PCPD2 90.00 usec  
PL12 15.60 dB  
PL13 15.60 dB  
PL2 -0.90 dB  
SFO2 400.1316005 MHz

F2 - Processing parameters  
SI 32768  
SF 100.6128073 MHz  
WDW EM  
SSB 0  
LB 1.00 Hz  
GB 0  
PC 1.40

S116

PROTON DMSO {D:\CRR} KOPAL 1

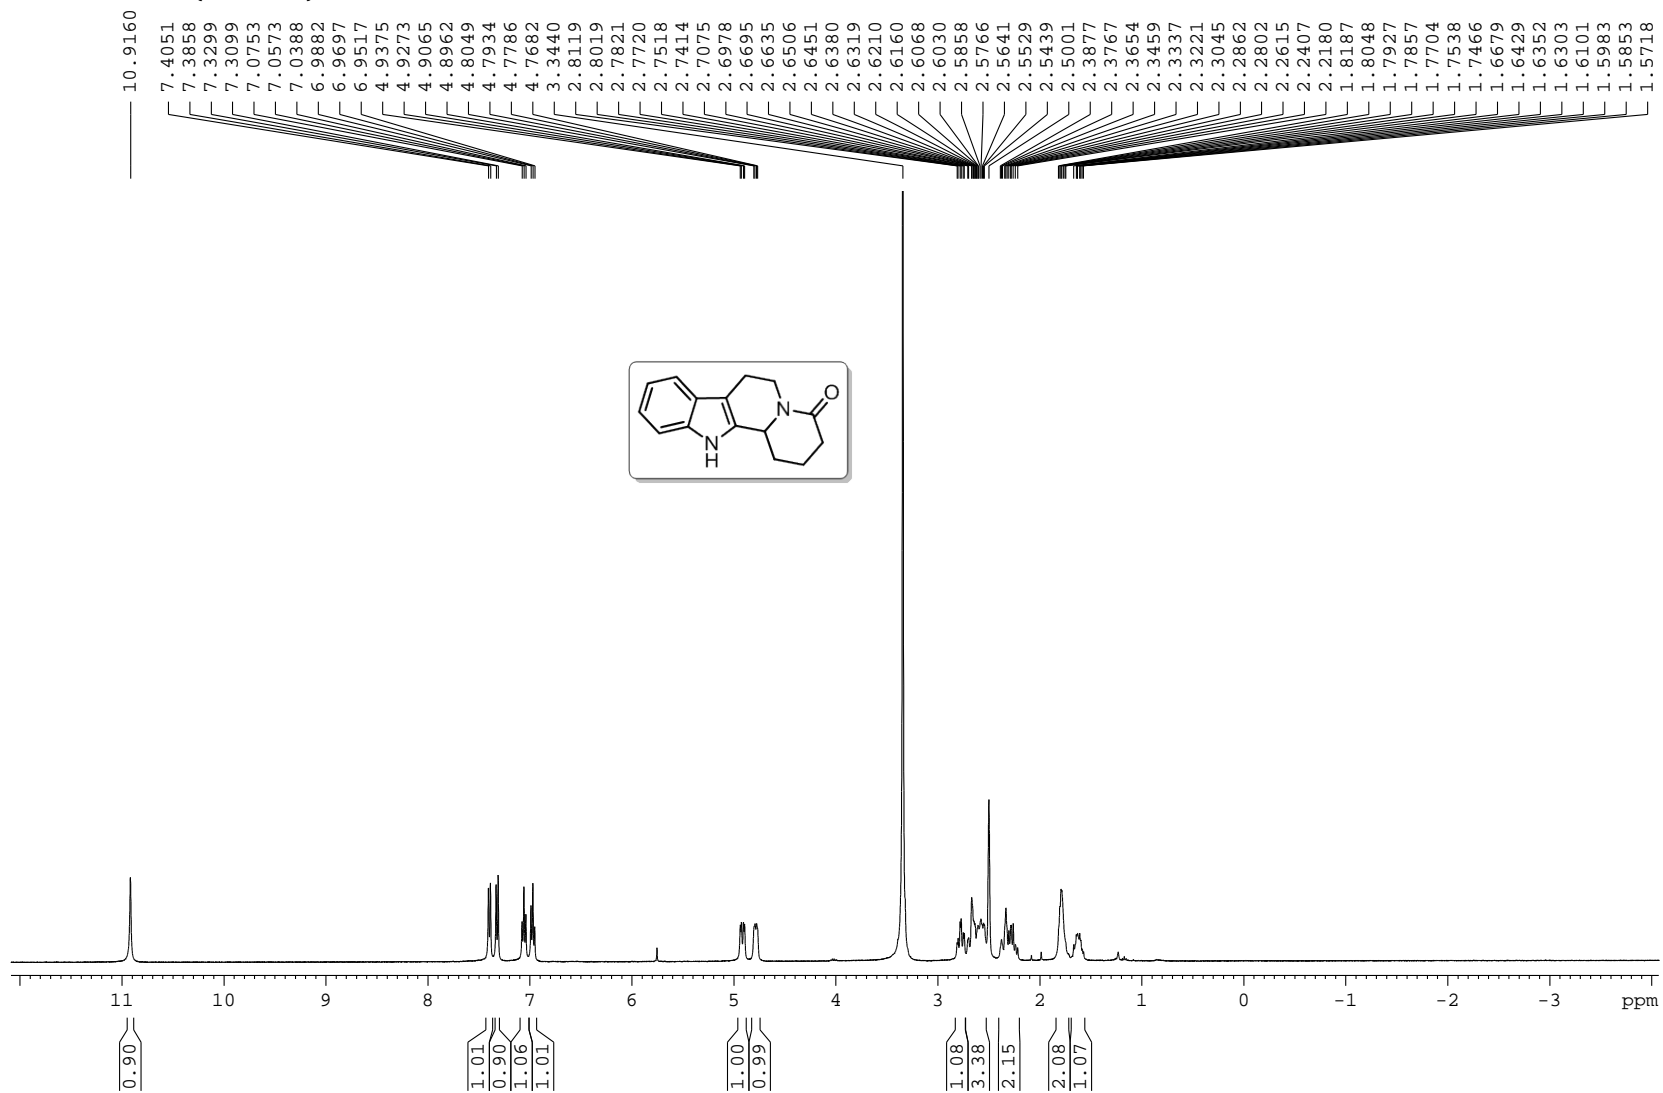

C13CPD CDC13 {D:\CRR} KOPAL 1

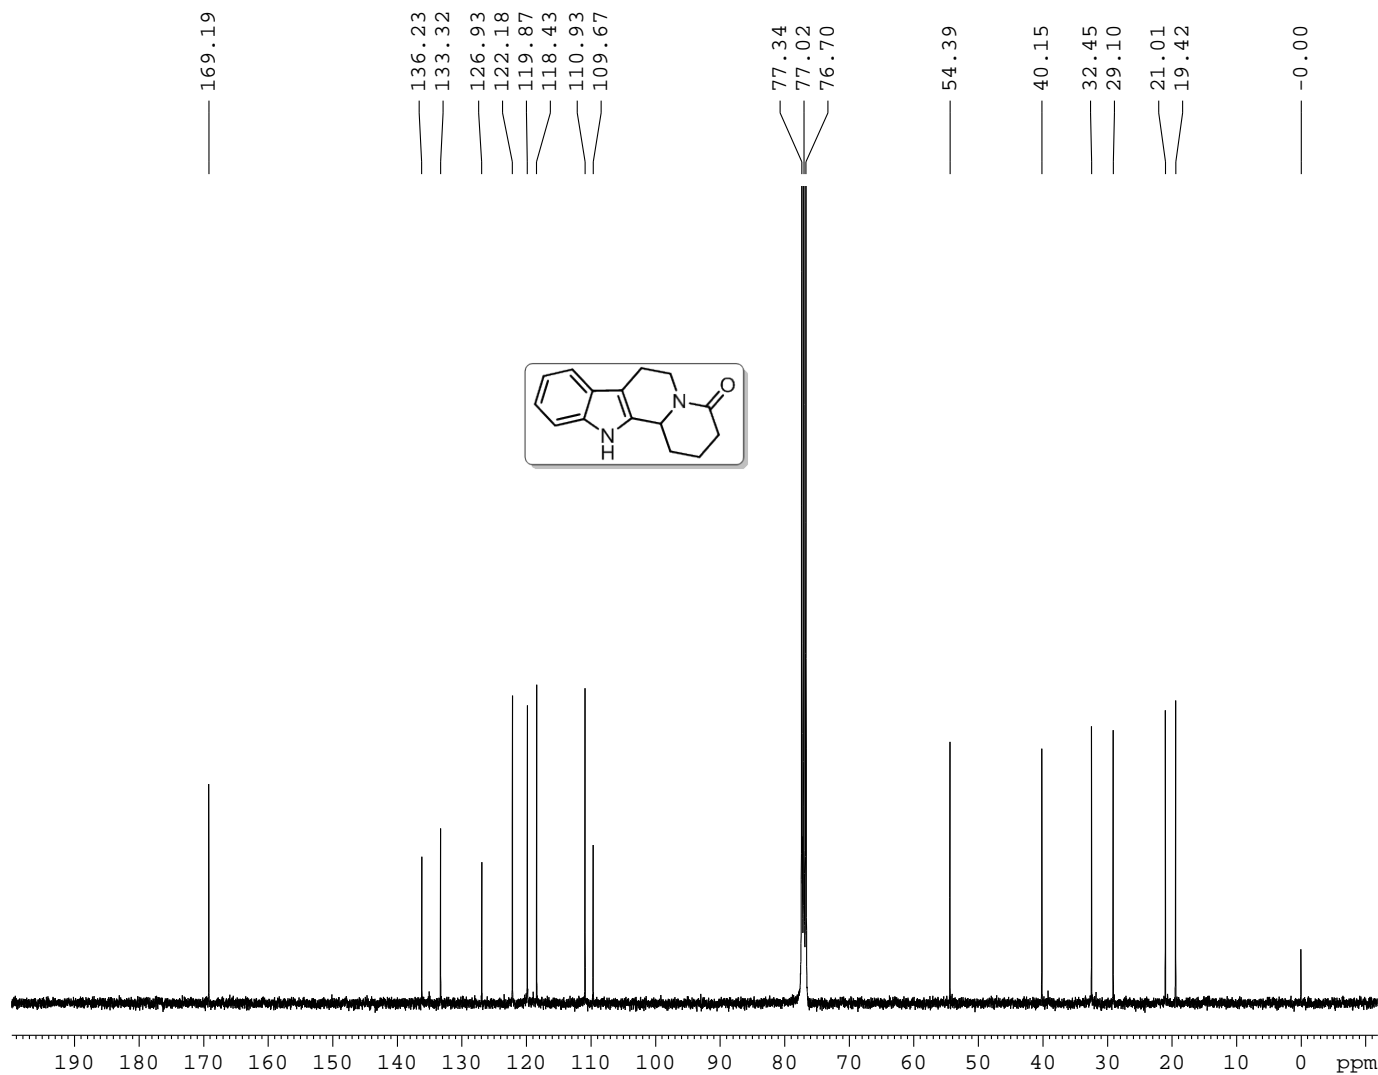

Current Data Parameters  
NAME SMR-CON-D  
EXPNO 1  
PROCNO 1

F2 - Acquisition Parameters  
Date\_ 20120221  
Time 21.37  
INSTRUM spect  
PROBHD 5 mm BBO BB-1H  
PULPROG zgpg30  
TD 65536  
SOLVENT CDC13  
NS 13497  
DS 4  
SWH 24038.461 Hz  
FIDRES 0.366798 Hz  
AQ 1.3631988 sec  
RG 50.8  
DW 20.800 usec  
DE 6.00 usec  
TE 298.1 K  
D1 2.00000000 sec  
d11 0.03000000 sec  
DELTA 1.899999998 sec  
TD0 1

==== CHANNEL f1 =====  
NUC1 13C  
P1 9.50 usec  
PL1 -0.60 dB  
SFO1 100.6228298 MHz

==== CHANNEL f2 =====  
CPDPRG2 waltz16  
NUC2 1H  
PCPD2 90.00 usec  
PL12 15.60 dB  
PL13 15.60 dB  
PL2 -0.90 dB  
SFO2 400.1316005 MHz

F2 - Processing parameters  
SI 32768  
SF 100.6127673 MHz  
WDW EM  
SSB 0  
LB 1.00 Hz  
GB 0  
PC 1.40

S118

PROTON CDC13 {D:\CRR} KOPAL 1

7.9386  
7.5205  
7.5013  
7.3503  
7.3303  
7.2587  
7.2061  
7.1882  
7.1693  
7.1468  
7.1278  
7.1100  
4.8688  
4.8571  
4.5715  
4.5577  
4.5393  
4.5255  
3.4909  
3.0141  
3.0046  
2.9845  
2.9736  
2.9539  
2.9430  
2.9176  
2.9068  
2.8797  
2.8690  
2.8419  
2.8323  
2.8275  
2.8118  
2.8034  
2.7742  
2.7602  
2.7468  
2.6843  
2.6706  
2.6560  
2.6409  
2.6266  
2.6126  
2.3424  
2.3074  
1.6004  
1.5668  
1.5451  
1.5184  
1.5078  
1.4735  
1.4598  
1.2769  
1.2545  
1.2401  
1.1264  
1.1002  
1.0744  
1.0461  
1.0130  
0.8340  
0.8260  
0.8014  
0.7700  
0.7378

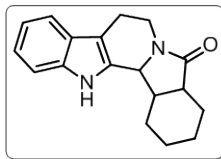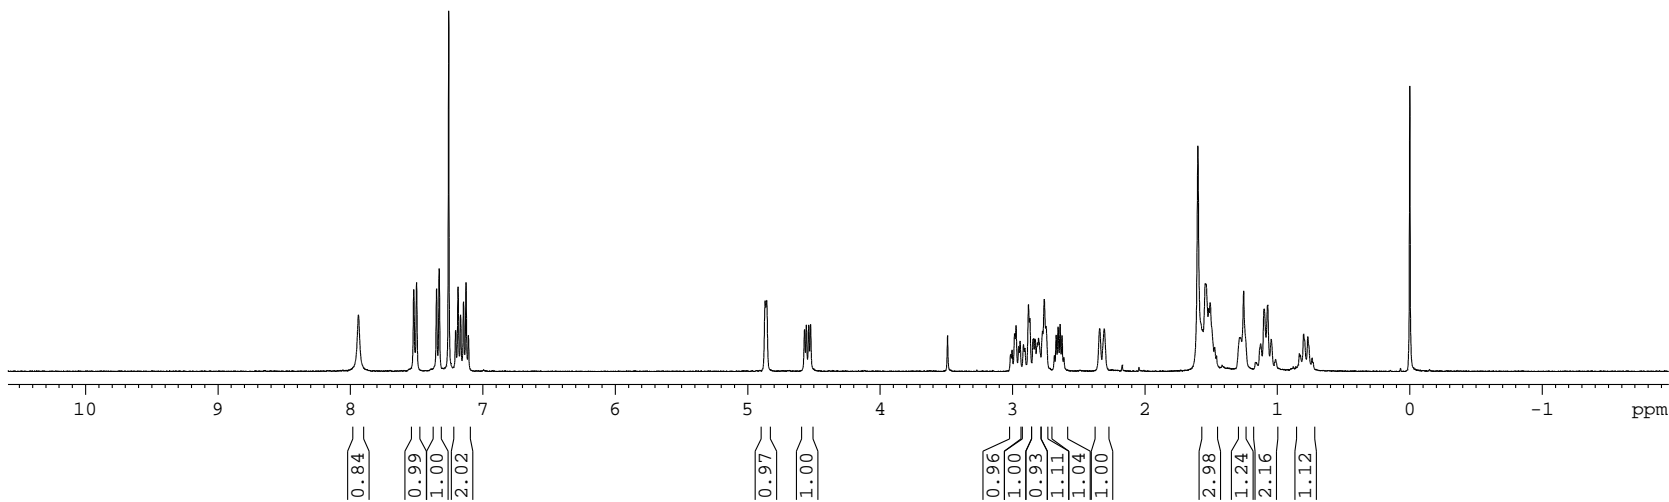

C13CPD CDC13 {D:\CRR} KOPAL 1

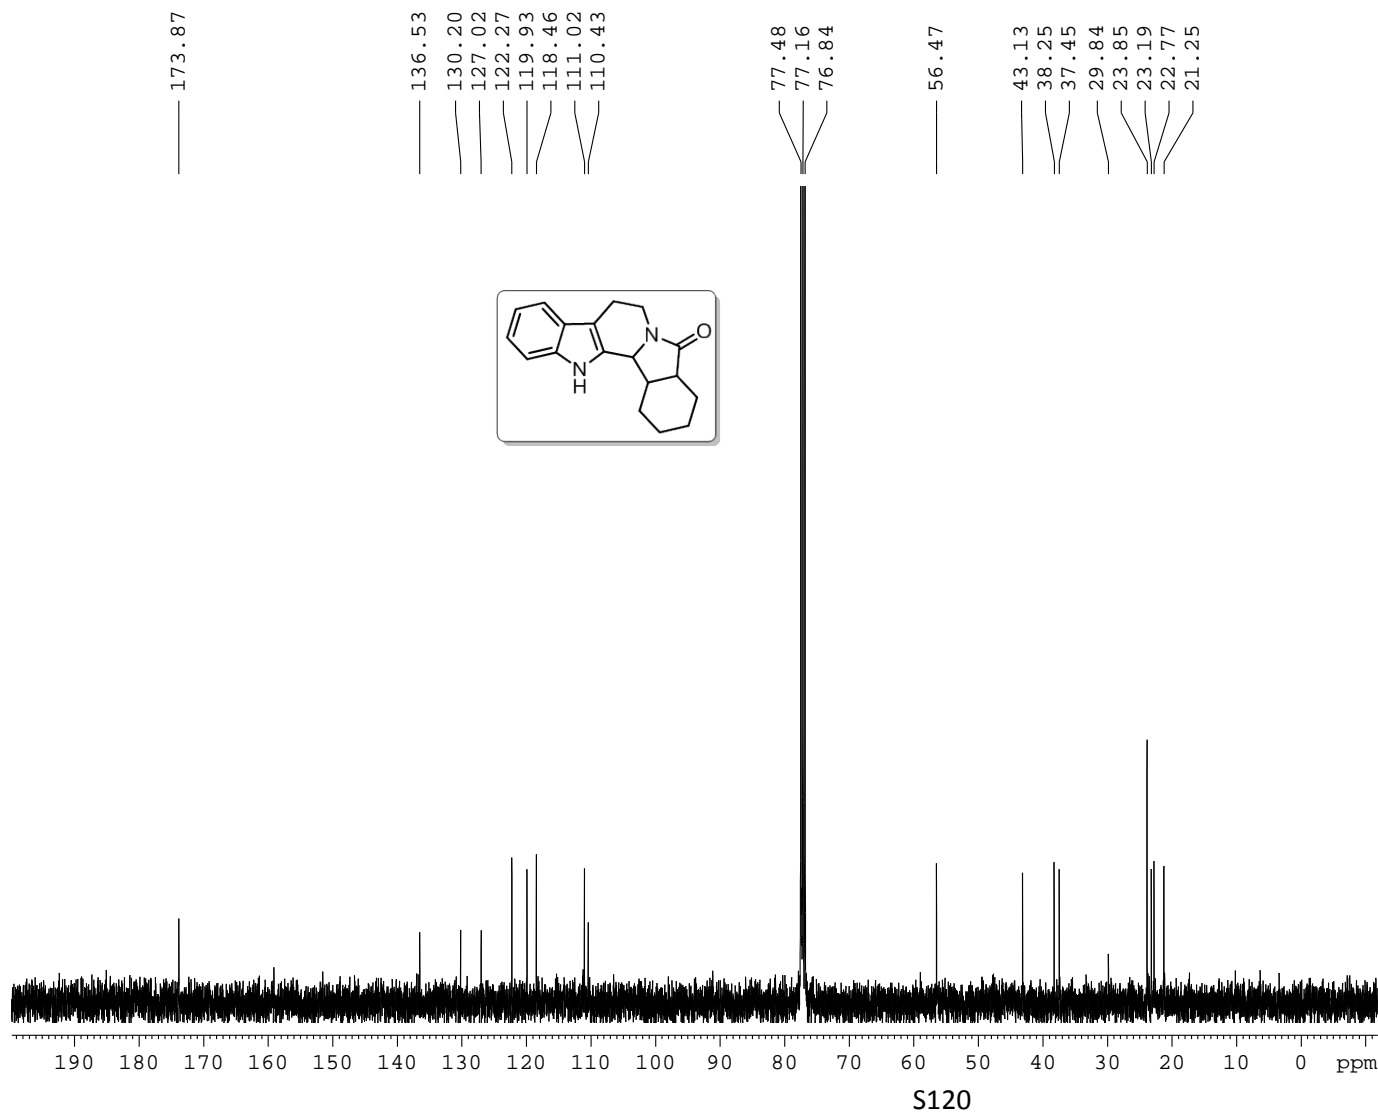

Current Data Parameters  
NAME SMR-HEX  
EXPNO 2  
PROCNO 1

F2 - Acquisition Parameters  
Date\_ 20110809  
Time 14.22  
INSTRUM spect  
PROBHD 5 mm BBO BB-1H  
PULPROG zgpg30  
TD 65536  
SOLVENT CDC13  
NS 346  
DS 4  
SWH 24038.461 Hz  
FIDRES 0.366798 Hz  
AQ 1.3631988 sec  
RG 1150  
DW 20.800 usec  
DE 6.00 usec  
TE 298.0 K  
D1 2.00000000 sec  
d11 0.03000000 sec  
DELTA 1.899999998 sec  
TD0 1

==== CHANNEL f1 =====  
NUC1 13C  
P1 9.50 usec  
PL1 -0.60 dB  
SFO1 100.6228298 MHz

==== CHANNEL f2 =====  
CPDPRG2 waltz16  
NUC2 1H  
PCPD2 90.00 usec  
PL12 15.60 dB  
PL13 15.60 dB  
PL2 -0.90 dB  
SFO2 400.1316005 MHz

F2 - Processing parameters  
SI 32768  
SF 100.6127532 MHz  
WDW EM  
SSB 0  
LB 1.00 Hz  
GB 0  
PC 1.40



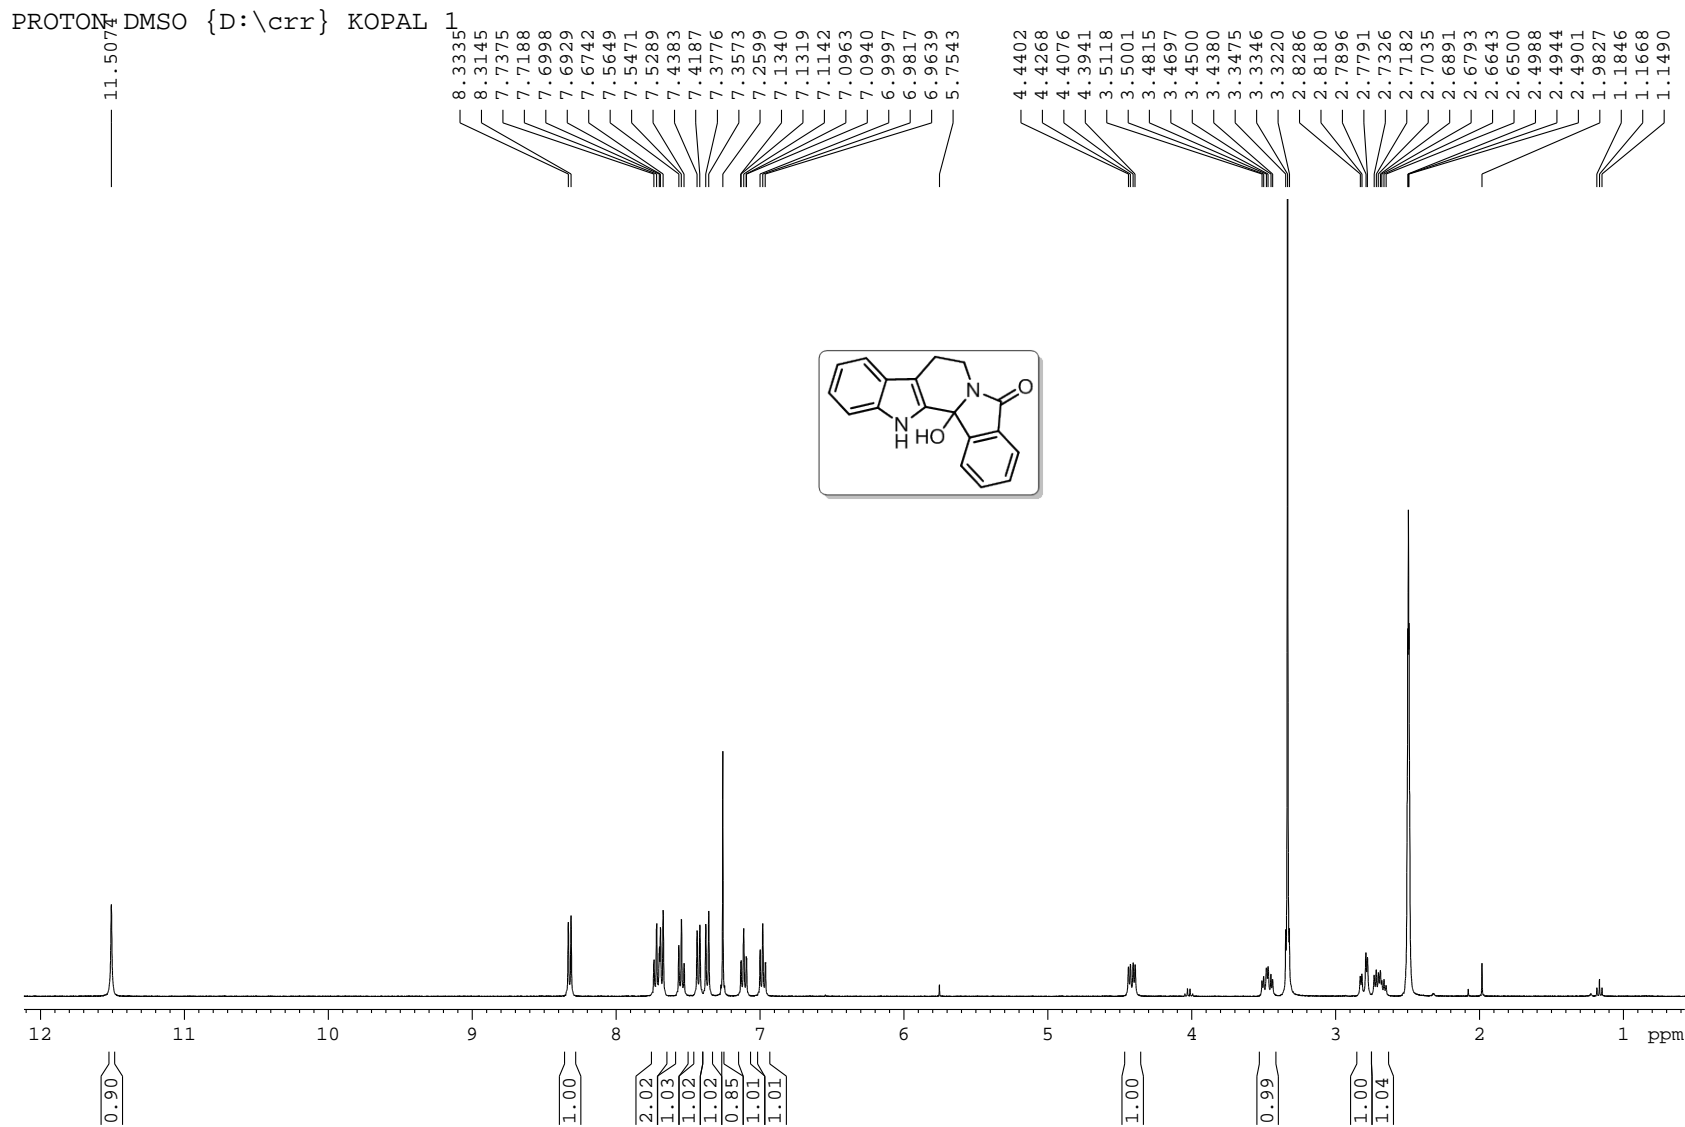

C13CPD CDC13 {D:\CRR} KOPAL 1

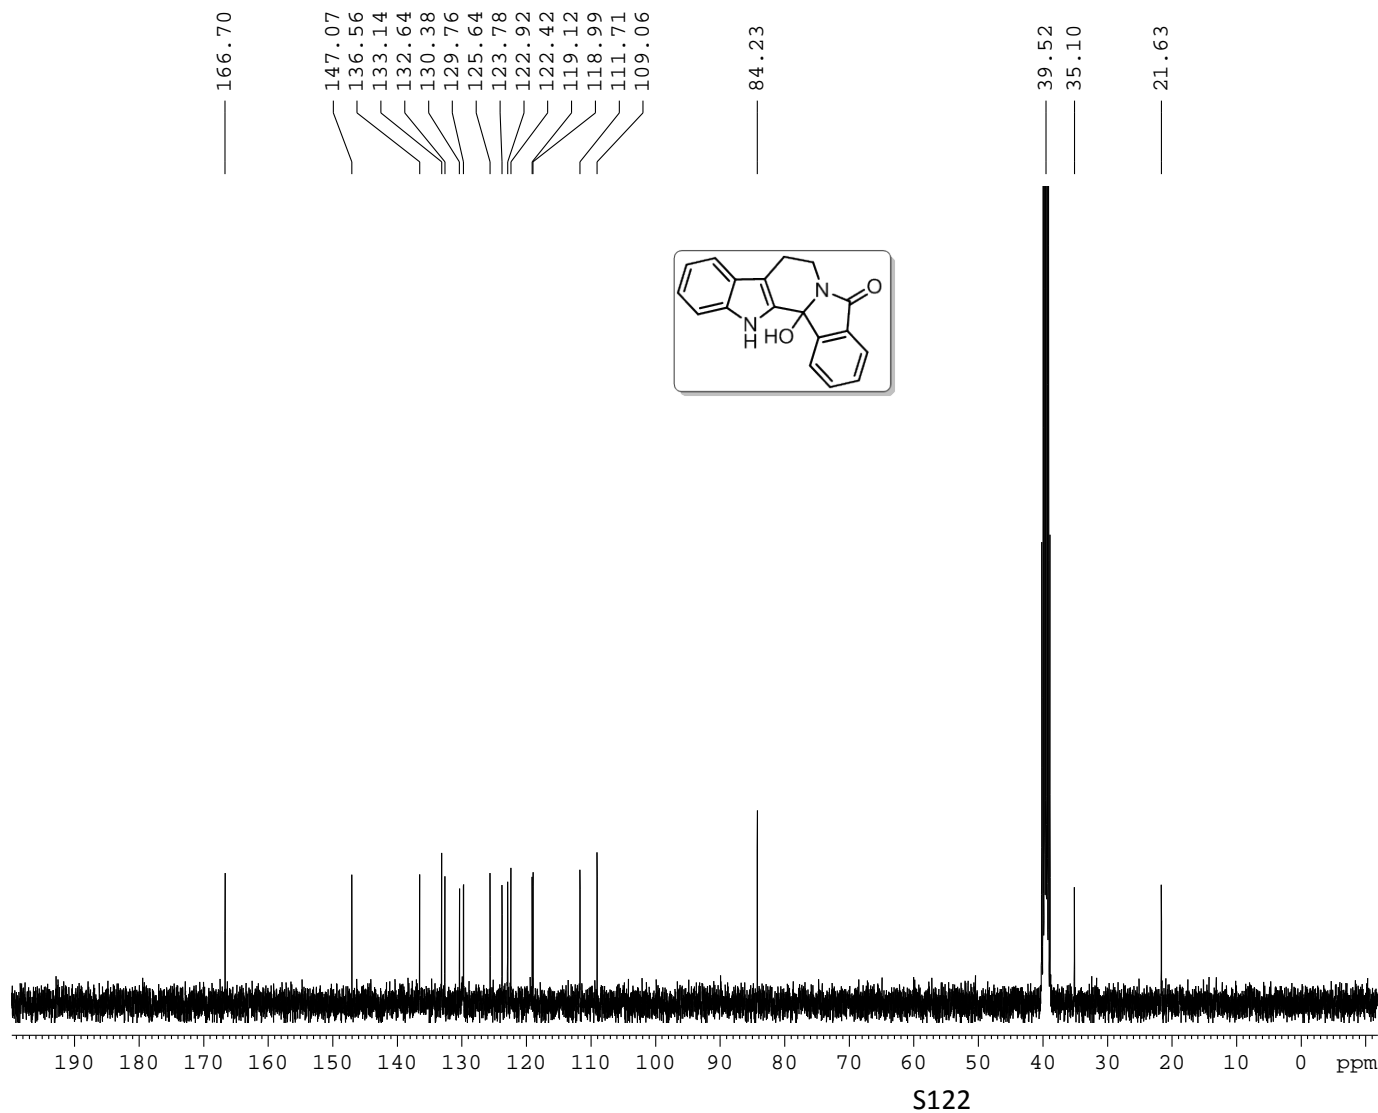

Current Data Parameters  
NAME SMR-I-108-2  
EXPNO 2  
PROCNO 1

F2 - Acquisition Parameters  
Date\_ 20100819  
Time 16.15  
INSTRUM spect  
PROBHD 5 mm BBO BB-1H  
PULPROG zgpg30  
TD 65536  
SOLVENT CDC13  
NS 256  
DS 4  
SWH 24038.461 Hz  
FIDRES 0.366798 Hz  
AQ 1.3631988 sec  
RG 812  
DW 20.800 usec  
DE 6.00 usec  
TE 296.3 K  
D1 2.00000000 sec  
d11 0.03000000 sec  
DELTA 1.89999998 sec  
TD0 1

==== CHANNEL f1 =====  
NUC1 13C  
P1 9.50 usec  
PL1 -0.60 dB  
SFO1 100.6228298 MHz

==== CHANNEL f2 =====  
CPDPRG2 waltz16  
NUC2 1H  
PCPD2 90.00 usec  
PL12 15.60 dB  
PL13 15.60 dB  
PL2 -0.90 dB  
SFO2 400.1316005 MHz

F2 - Processing parameters  
SI 32768  
SF 100.6132729 MHz  
WDW EM  
SSB 0  
LB 1.00 Hz  
GB 0  
PC 1.40

PROTON CDC13 {D:\CRR} KOPAL 1

7.8464  
7.4987  
7.4798  
7.3226  
7.3030  
7.2599  
7.1642  
7.1615  
7.1464  
7.1442  
7.1274  
7.1238  
7.1170  
7.1140  
7.0978  
7.0960  
7.0800  
7.0778  
4.2571  
4.2521  
4.2465  
4.2397  
4.2335  
4.2283  
3.3556  
3.3498  
3.3420  
3.3366  
3.3233  
3.3179  
3.3097  
3.3048  
3.1205  
3.1086  
3.0940  
3.0881  
3.0822  
3.0772  
3.0618  
3.0503  
2.9607  
2.9554  
2.9459  
2.9421  
2.9341  
2.9288  
2.9222  
2.9016  
2.8898  
2.8813  
2.8764  
2.8706  
2.8684  
2.6828  
2.6770  
2.6497  
2.6442  
2.6384  
2.5051  
2.2998  
2.2947  
2.2859  
2.2804  
2.2752  
1.9915  
1.9437  
1.9319  
1.9223  
1.9050  
1.8983  
1.8932  
1.8804  
1.8751  
1.8657  
1.8585  
1.8502  
0.0052

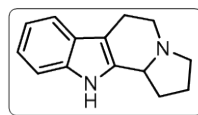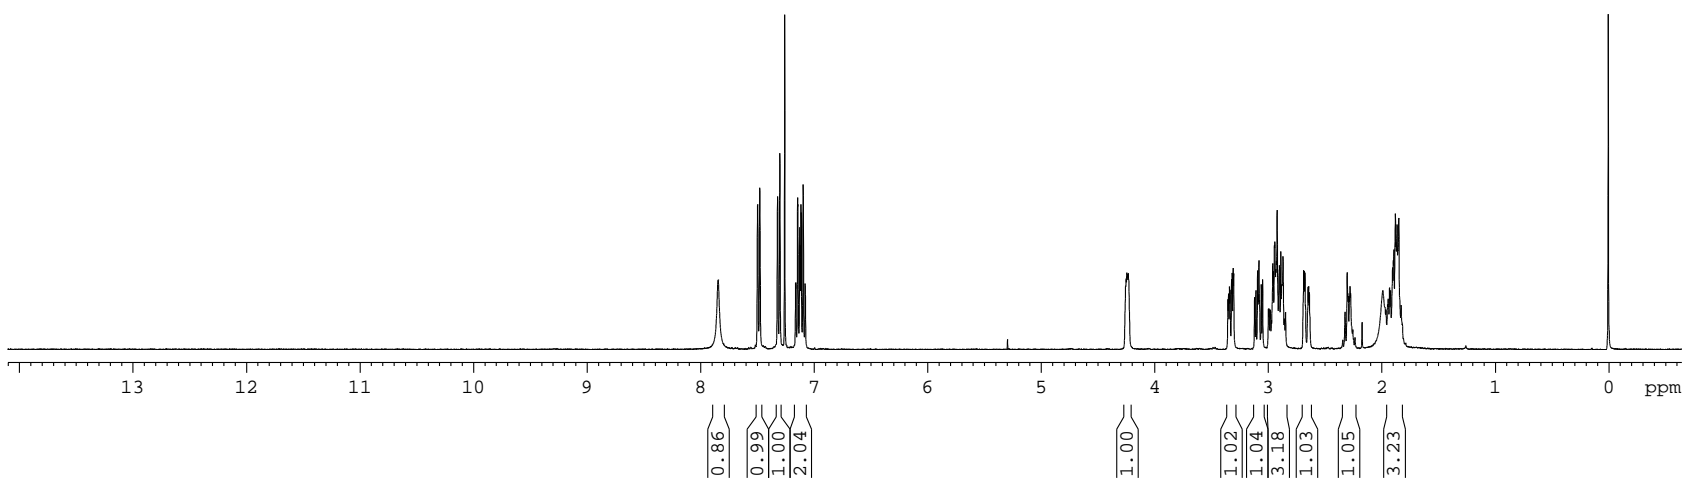

PROTON CDC13 {D:\CRR} KOPAL 1

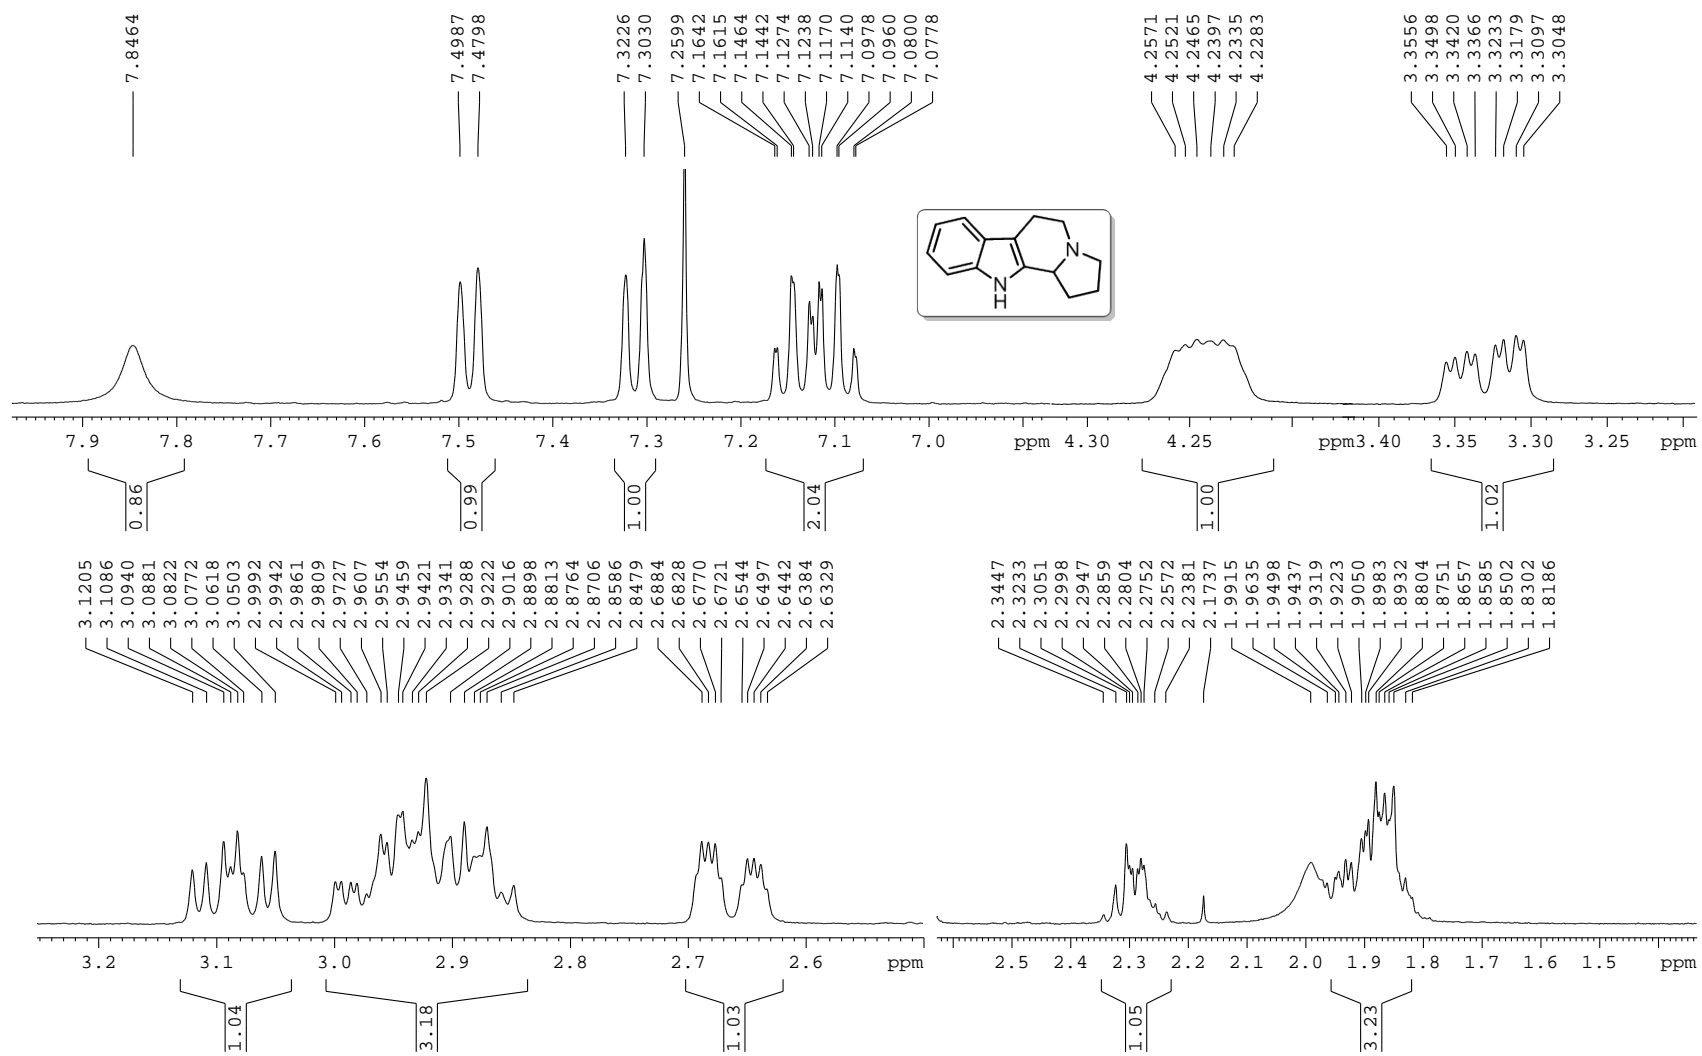

C13CPD CDC13 {D:\CRR} KOPAL 1

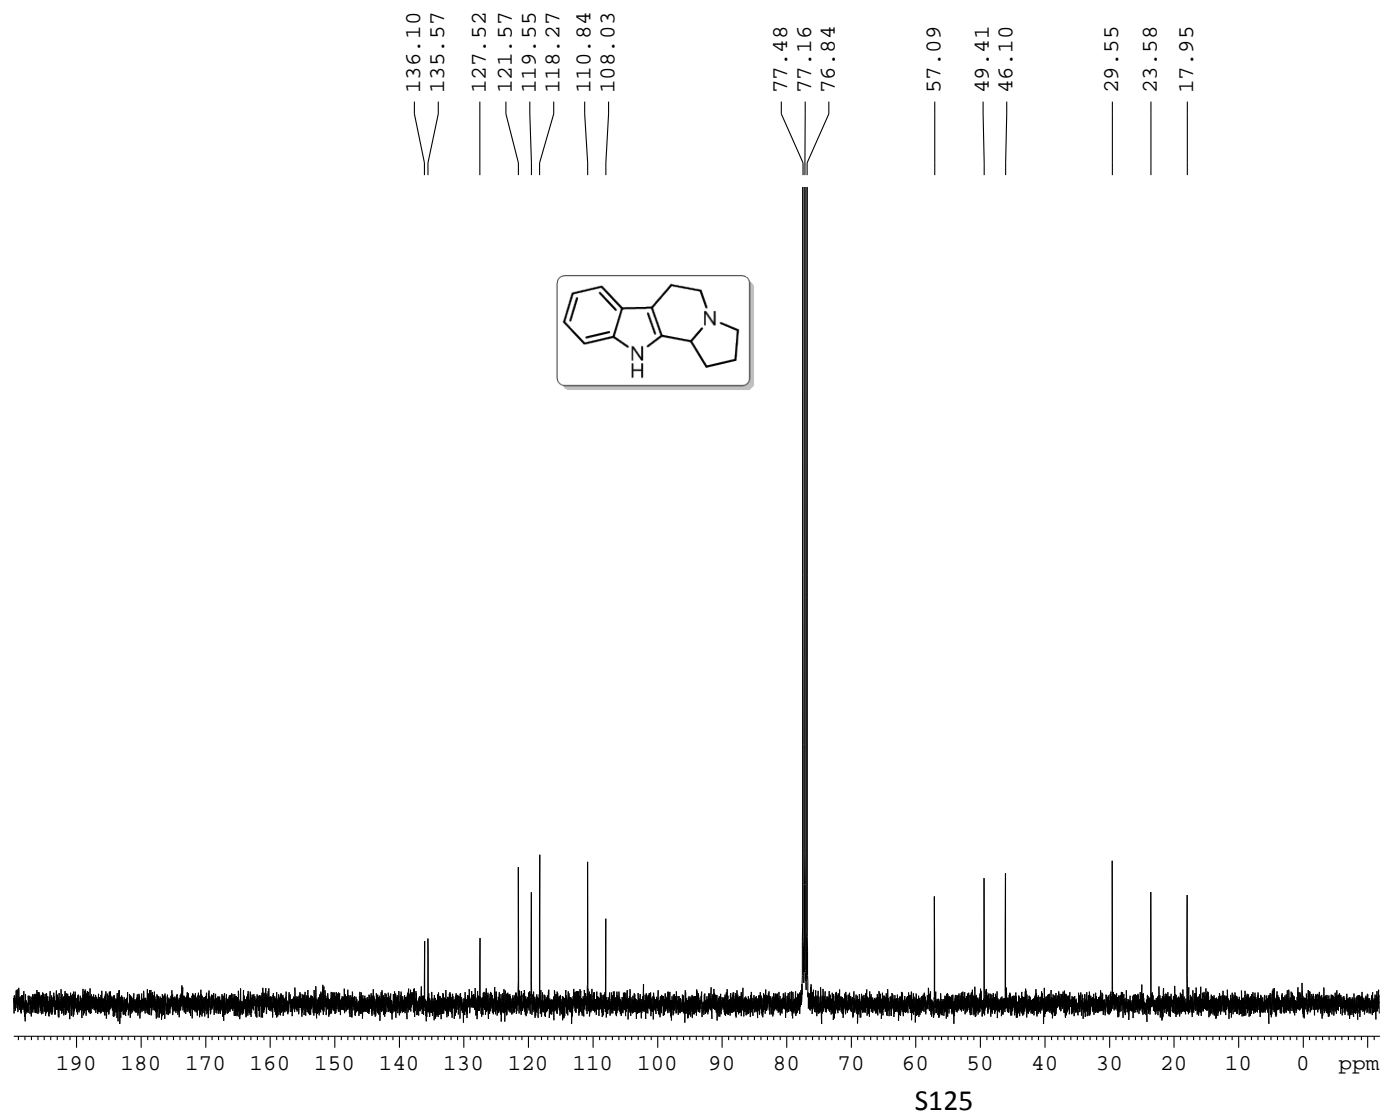

Current Data Parameters  
NAME SMR-AL  
EXPNO 2  
PROCNO 1

F2 - Acquisition Parameters  
Date\_ 20111125  
Time 12.10  
INSTRUM spect  
PROBHD 5 mm BBO BB-1H  
PULPROG zgpg30  
TD 65536  
SOLVENT CDC13  
NS 512  
DS 4  
SWH 24038.461 Hz  
FIDRES 0.366798 Hz  
AQ 1.3631988 sec  
RG 2050  
DW 20.800 usec  
DE 6.00 usec  
TE 295.8 K  
D1 2.00000000 sec  
d11 0.03000000 sec  
DELTA 1.89999998 sec  
TD0 1

==== CHANNEL f1 =====  
NUC1 13C  
P1 9.50 usec  
PL1 -0.60 dB  
SFO1 100.6228298 MHz

==== CHANNEL f2 =====  
CPDPRG2 waltz16  
NUC2 1H  
PCPD2 90.00 usec  
PL12 15.60 dB  
PL13 15.60 dB  
PL2 -0.90 dB  
SFO2 400.1316005 MHz

F2 - Processing parameters  
SI 32768  
SF 100.6127541 MHz  
WDW EM  
SSB 0  
LB 1.00 Hz  
GB 0  
PC 1.40

PROTON CDC13 {D:\CRR} KOPAL 1

7.7167  
7.4812  
7.4623  
7.3140  
7.2944  
7.2600  
7.1477  
7.1315  
7.1130  
7.1101  
7.1020  
7.0996  
7.0829  
7.0651  
3.2620  
3.2358  
3.0980  
3.0835  
3.0725  
3.0582  
3.0451  
3.0381  
3.0273  
3.0219  
3.0170  
3.0003  
2.9939  
2.9856  
2.9798  
2.7335  
2.7268  
2.6993  
2.6891  
2.6742  
2.6471  
2.6362  
2.6192  
2.4286  
2.4187  
2.4006  
2.3911  
2.3724  
2.3632  
2.0919  
2.0849  
2.0605  
2.0550  
1.9367  
1.9285  
1.9199  
1.9062  
1.8978  
1.8891  
1.7942  
1.7738  
1.7639  
1.7532  
1.7455  
1.7377  
1.7115  
1.6676  
1.6589  
1.6491  
1.6266  
1.6182  
1.5979  
1.5900  
1.5673  
1.5604  
1.5403  
1.5189  
1.5091  
1.4984  
1.4884  
1.4778  
1.4676  
0.0036

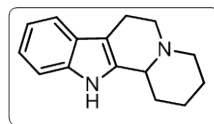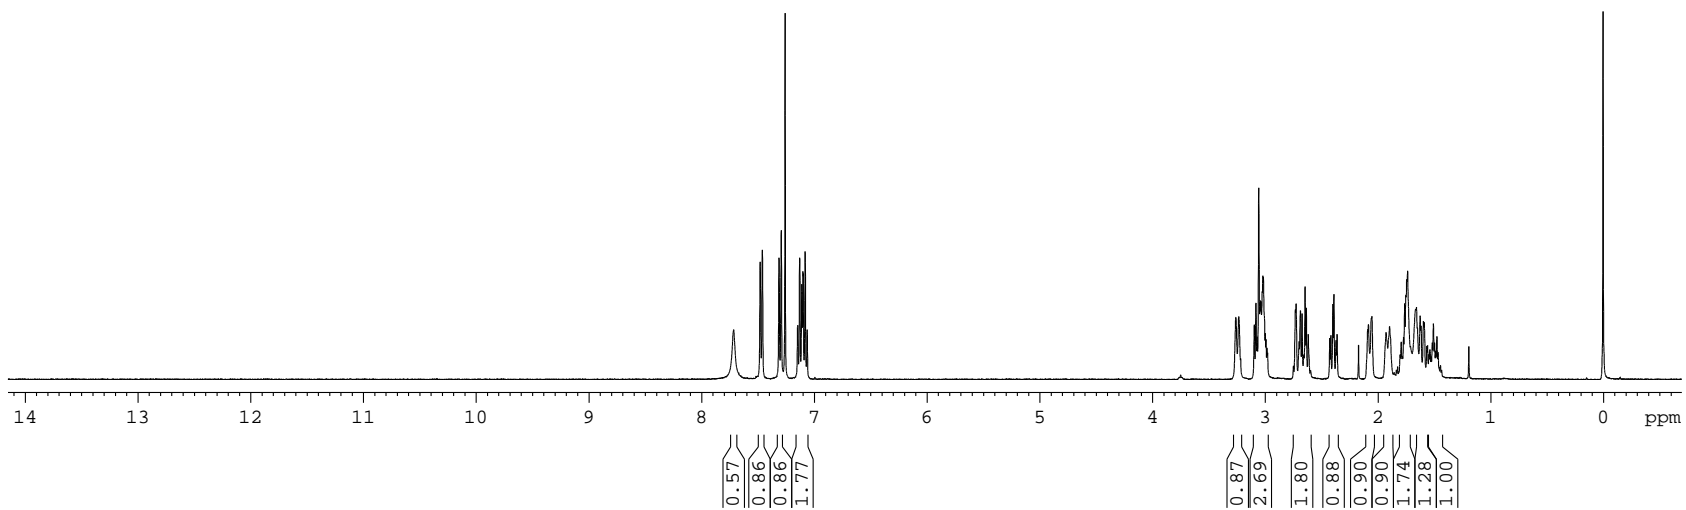

PROTON CDC13 {D:\CRR} KOPAL 1

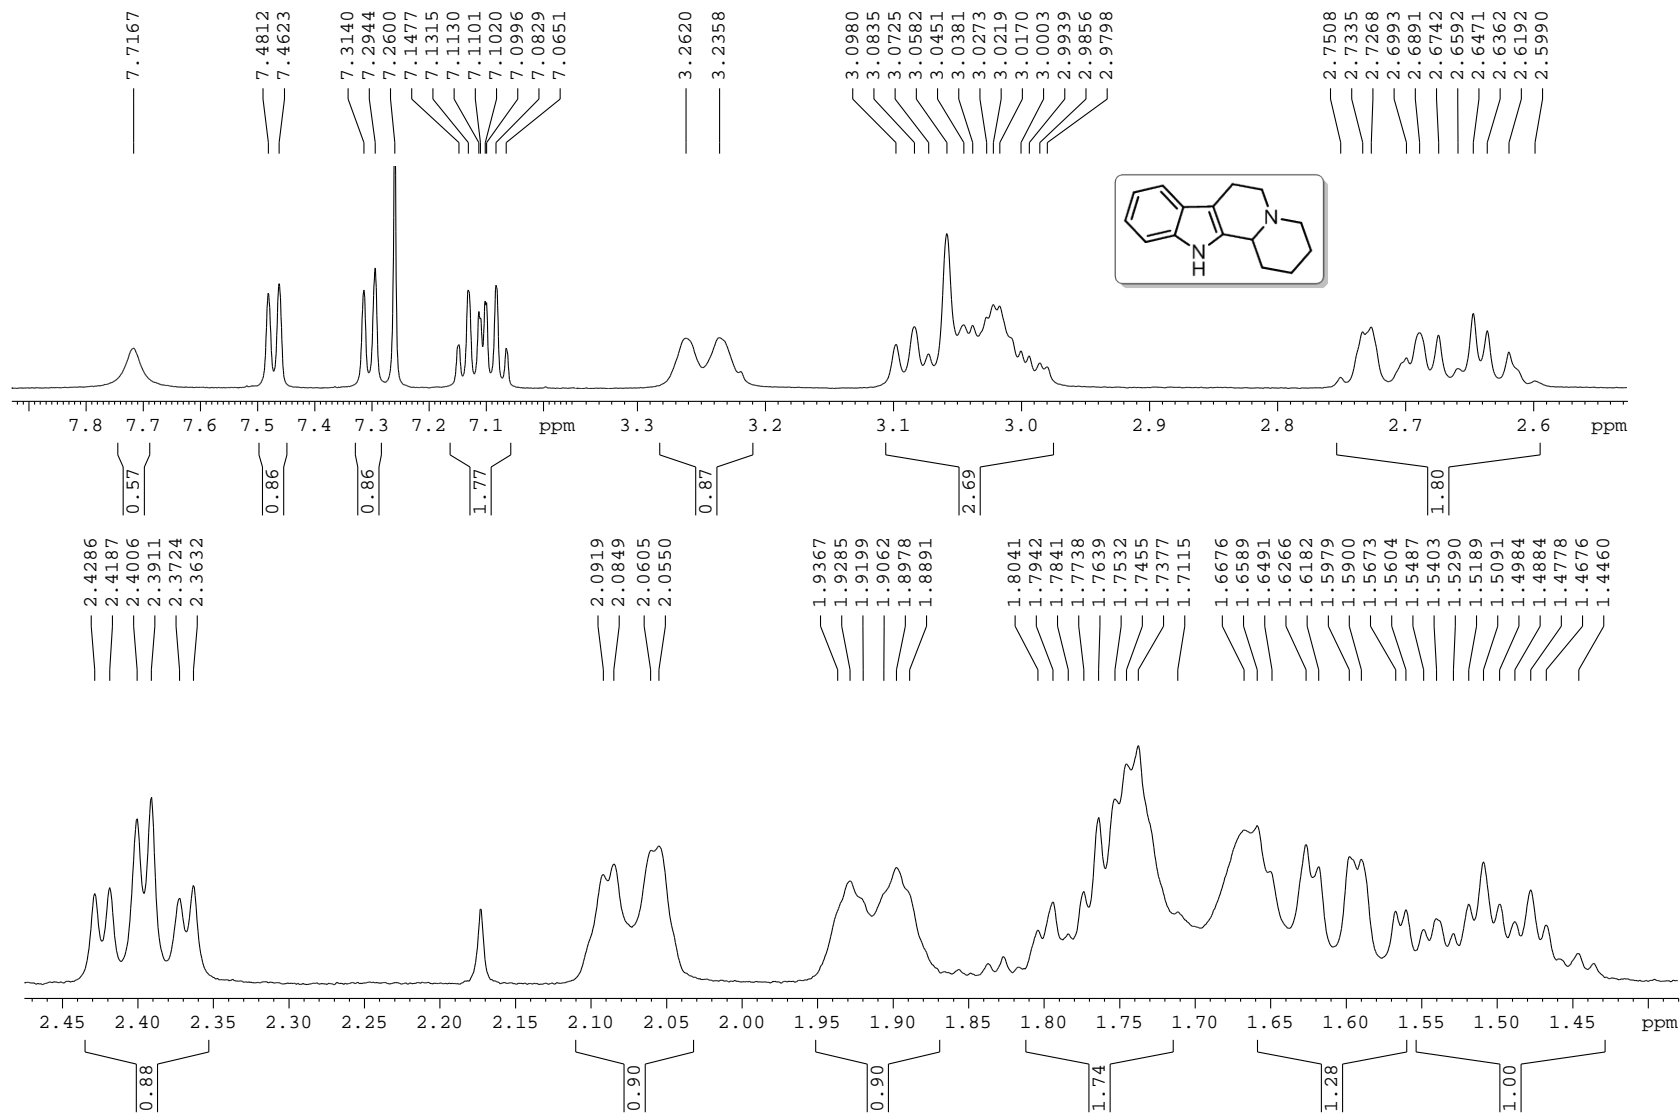

C13CPD CDC13 {D:\CRR} KOPAL 1

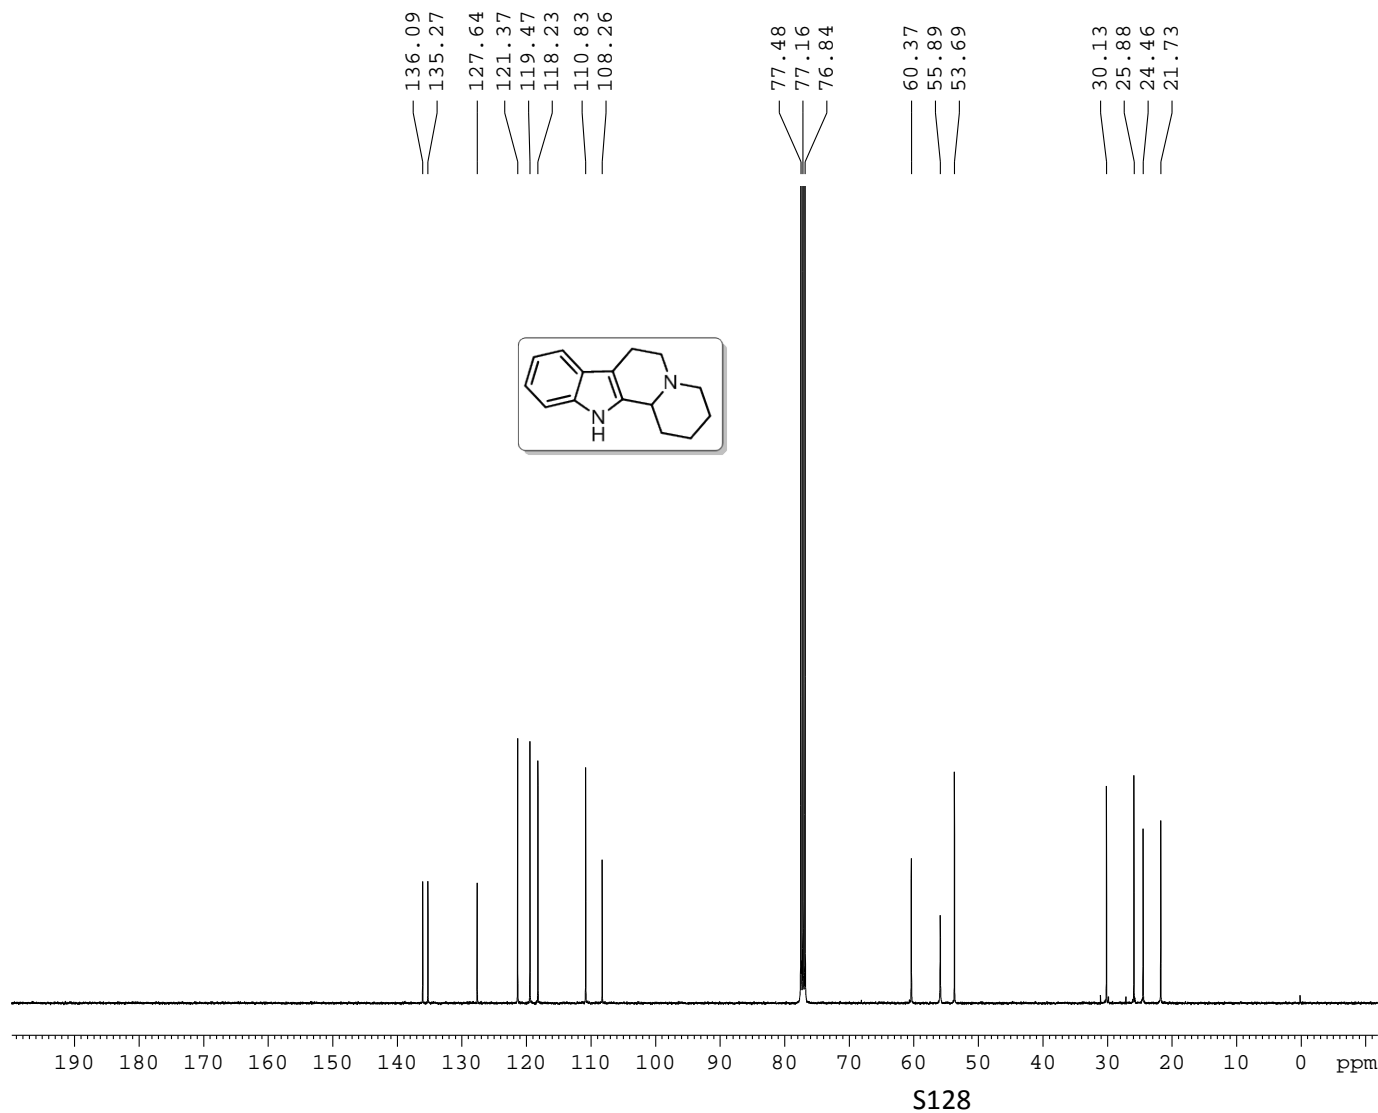

Current Data Parameters  
NAME SMR-DES  
EXPNO 1  
PROCNO 1

F2 - Acquisition Parameters  
Date\_ 20120201  
Time 9.32  
INSTRUM spect  
PROBHD 5 mm BBO BB-1H  
PULPROG zgpg30  
TD 65536  
SOLVENT CDC13  
NS 17000  
DS 4  
SWH 24038.461 Hz  
FIDRES 0.366798 Hz  
AQ 1.3631988 sec  
RG 1150  
DW 20.800 usec  
DE 6.00 usec  
TE 296.8 K  
D1 2.00000000 sec  
d11 0.03000000 sec  
DELTA 1.89999998 sec  
TD0 1

==== CHANNEL f1 =====  
NUC1 13C  
P1 9.50 usec  
PL1 -0.60 dB  
SFO1 100.6228298 MHz

==== CHANNEL f2 =====  
CPDPRG2 waltz16  
NUC2 1H  
PCPD2 90.00 usec  
PL12 15.60 dB  
PL13 15.60 dB  
PL2 -0.90 dB  
SFO2 400.1316005 MHz

F2 - Processing parameters  
SI 32768  
SF 100.6127566 MHz  
WDW EM  
SSB 0  
LB 1.00 Hz  
GB 0  
PC 1.40
